# Supplementary material
Source: publisher figshare collection journal article supplement (https://acs.figshare.com/ndownloader/files/3739654)
Supplement: Supplementary file 1 [file 3739654]

data_trans1
_publcif_datablock.id '{37931d38-8e4f-473e-a510-49f906bd7968}'
_iucr_refine_instructions_details
;
TITL AT196 in P2(1)/c
CELL 0.71073 11.2034 25.0424 11.8440 90.000 101.066 90.000
ZERR 4.00 0.0003 0.0007 0.0003 0.000 0.001 0.000
LATT 1
SYMM -x, y+1/2, -z+1/2
SFAC C  N  P  Ru Cl H
UNIT 132  4  4  4  16  176
L.S. 40
ACTA
BOND $H
FMAP 2
OMIT 1   1   0
OMIT 0  12   0
OMIT 2   1   3
PLAN -95
SIZE 0.080 0.150 0.170
HTAB
CONF
TEMP -173.140
WGHT    0.022500    4.270600
FVAR       0.10267
RU1   4    0.264417    0.387663    0.172926    11.00000    0.01351    0.00792 =
         0.00821    0.00075    0.00411    0.00065
P1    3    0.222050    0.339054    0.329979    11.00000    0.01194    0.00789 =
         0.00839    0.00015    0.00337   -0.00005
C1    1    0.225503    0.379526    0.462564    11.00000    0.01712    0.01043 =
         0.00942   -0.00048    0.00520   -0.00031
AFIX  13
H1    6    0.313375    0.387999    0.490902    11.00000   -1.20000
AFIX   0
C2    1    0.161377    0.434305    0.446157    11.00000    0.02739    0.01104 =
         0.01454   -0.00071    0.00636    0.00245
AFIX  23
H2A   6    0.190212    0.454399    0.384571    11.00000   -1.20000
H2B   6    0.072538    0.428994    0.422341    11.00000   -1.20000
AFIX   0
C3    1    0.187943    0.466503    0.558378    11.00000    0.03068    0.01274 =
         0.01708   -0.00348    0.00752    0.00081
AFIX  23
H3A   6    0.275655    0.475337    0.577087    11.00000   -1.20000
H3B   6    0.141804    0.500433    0.547683    11.00000   -1.20000
AFIX   0
C4    1    0.153124    0.435530    0.658195    11.00000    0.02318    0.01833 =
         0.01355   -0.00519    0.00600   -0.00075
AFIX  23
H4A   6    0.176355    0.456446    0.729983    11.00000   -1.20000
H4B   6    0.063891    0.430310    0.643672    11.00000   -1.20000
AFIX   0
C5    1    0.216196    0.381277    0.673077    11.00000    0.02502    0.01701 =
         0.01096   -0.00152    0.00604   -0.00261
AFIX  23
H5A   6    0.189447    0.361400    0.736071    11.00000   -1.20000
H5B   6    0.305286    0.386474    0.694355    11.00000   -1.20000
AFIX   0
C6    1    0.186050    0.348905    0.561812    11.00000    0.01921    0.01327 =
         0.01156   -0.00038    0.00633   -0.00098
AFIX  23
H6A   6    0.097460    0.341981    0.542736    11.00000   -1.20000
H6B   6    0.228533    0.314078    0.572517    11.00000   -1.20000
AFIX   0
C7    1    0.082595    0.297729    0.319383    11.00000    0.01339    0.01015 =
         0.01180    0.00150    0.00391   -0.00129
AFIX  13
H7    6    0.080946    0.284978    0.399080    11.00000   -1.20000
AFIX   0
C8    1    0.079341    0.247507    0.244382    11.00000    0.01608    0.01245 =
         0.01834   -0.00310    0.00360   -0.00297
AFIX  23
H8A   6    0.077790    0.258057    0.163558    11.00000   -1.20000
H8B   6    0.153631    0.226054    0.271030    11.00000   -1.20000
AFIX   0
C9    1   -0.033351    0.213772    0.251018    11.00000    0.02054    0.01474 =
         0.02060   -0.00280    0.00294   -0.00637
AFIX  23
H9A   6   -0.035578    0.182364    0.199896    11.00000   -1.20000
H9B   6   -0.027838    0.200626    0.330683    11.00000   -1.20000
AFIX   0
C10   1   -0.150179    0.245828    0.215602    11.00000    0.01601    0.02534 =
         0.02305    0.00357   -0.00056   -0.00707
AFIX  23
H10A  6   -0.160804    0.255386    0.133168    11.00000   -1.20000
H10B  6   -0.220517    0.223709    0.225979    11.00000   -1.20000
AFIX   0
C11   1   -0.146697    0.296540    0.287247    11.00000    0.01437    0.02116 =
         0.02776    0.00700    0.00552    0.00105
AFIX  23
H11A  6   -0.146088    0.286851    0.368393    11.00000   -1.20000
H11B  6   -0.220868    0.317842    0.259040    11.00000   -1.20000
AFIX   0
C12   1   -0.034108    0.330342    0.280827    11.00000    0.01469    0.01453 =
         0.02353    0.00414    0.00620    0.00120
AFIX  23
H12A  6   -0.032596    0.362115    0.330818    11.00000   -1.20000
H12B  6   -0.038271    0.342842    0.200867    11.00000   -1.20000
AFIX   0
C13   1    0.342831    0.287841    0.376674    11.00000    0.01275    0.00973 =
         0.00939    0.00069    0.00242   -0.00007
AFIX  13
H13   6    0.303038    0.256855    0.407812    11.00000   -1.20000
AFIX   0
C14   1    0.392398    0.267316    0.272062    11.00000    0.01771    0.01477 =
         0.01092   -0.00010    0.00450    0.00207
AFIX  23
H14A  6    0.323759    0.256409    0.210664    11.00000   -1.20000
H14B  6    0.437037    0.296383    0.241537    11.00000   -1.20000
AFIX   0
C15   1    0.477350    0.219866    0.305575    11.00000    0.02317    0.01583 =
         0.01603   -0.00052    0.00510    0.00724
AFIX  23
H15A  6    0.509800    0.207969    0.237666    11.00000   -1.20000
H15B  6    0.430903    0.189865    0.330367    11.00000   -1.20000
AFIX   0
C16   1    0.582954    0.234237    0.402704    11.00000    0.01626    0.02326 =
         0.02238    0.00106    0.00311    0.00656
AFIX  23
H16A  6    0.631868    0.201873    0.427150    11.00000   -1.20000
H16B  6    0.636170    0.260620    0.374495    11.00000   -1.20000
AFIX   0
C17   1    0.536786    0.257454    0.505229    11.00000    0.01557    0.02447 =
         0.01428   -0.00054   -0.00061    0.00420
AFIX  23
H17A  6    0.606948    0.269331    0.563943    11.00000   -1.20000
H17B  6    0.493477    0.229298    0.540101    11.00000   -1.20000
AFIX   0
C18   1    0.450630    0.304875    0.470508    11.00000    0.01452    0.01617 =
         0.01360   -0.00103    0.00109    0.00000
AFIX  23
H18A  6    0.495336    0.334354    0.441485    11.00000   -1.20000
H18B  6    0.420207    0.318008    0.538592    11.00000   -1.20000
AFIX   0
N1    2    0.323242    0.429047    0.036601    11.00000    0.01630    0.01218 =
         0.00951   -0.00050    0.00410   -0.00185
C19   1    0.140432    0.435391    0.167861    11.00000    0.01628    0.01271 =
         0.01048   -0.00102    0.00587   -0.00033
AFIX  43
H19   6    0.073447    0.423769    0.200004    11.00000   -1.20000
AFIX   0
C20   1    0.132071    0.489138    0.120406    11.00000    0.01531    0.01121 =
         0.01140    0.00029    0.00232    0.00082
C21   1    0.046120    0.522009    0.156220    11.00000    0.02208    0.01424 =
         0.01411   -0.00008    0.00614    0.00050
AFIX  43
H21   6   -0.001994    0.507796    0.206944    11.00000   -1.20000
AFIX   0
C22   1    0.027947    0.574957    0.120529    11.00000    0.02339    0.01266 =
         0.01938   -0.00126    0.00412    0.00537
AFIX  43
H22   6   -0.030010    0.596568    0.148096    11.00000   -1.20000
AFIX   0
C23   1    0.094871    0.595362    0.045143    11.00000    0.02258    0.00865 =
         0.02029    0.00234    0.00060    0.00255
AFIX  43
H23   6    0.083162    0.631433    0.020682    11.00000   -1.20000
AFIX   0
C24   1    0.180691    0.563685    0.003410    11.00000    0.01573    0.01346 =
         0.01549    0.00173   -0.00137   -0.00109
C25   1    0.241578    0.584849   -0.083162    11.00000    0.01934    0.01381 =
         0.02174    0.00926    0.00030   -0.00089
AFIX  43
H25   6    0.227181    0.620856   -0.107194    11.00000   -1.20000
AFIX   0
C26   1    0.318320    0.555016   -0.130959    11.00000    0.01927    0.01938 =
         0.01673    0.00774    0.00465   -0.00269
AFIX  43
H26   6    0.353467    0.569453   -0.191190    11.00000   -1.20000
AFIX   0
C27   1    0.347595    0.501617   -0.091859    11.00000    0.01470    0.01503 =
         0.01134    0.00088    0.00104   -0.00433
C28   1    0.432871    0.471223   -0.136870    11.00000    0.01779    0.01973 =
         0.00999   -0.00073    0.00390   -0.00717
AFIX  43
H28   6    0.469929    0.485347   -0.196158    11.00000   -1.20000
AFIX   0
C29   1    0.462168    0.420981   -0.094483    11.00000    0.01850    0.01644 =
         0.01442   -0.00412    0.00726   -0.00249
AFIX  43
H29   6    0.520276    0.399883   -0.123095    11.00000   -1.20000
AFIX   0
C30   1    0.404702    0.401625   -0.008491    11.00000    0.02023    0.01219 =
         0.01477    0.00016    0.00560   -0.00005
AFIX  43
H30   6    0.424838    0.366632    0.019863    11.00000   -1.20000
AFIX   0
C31   1    0.292094    0.479410   -0.003840    11.00000    0.01424    0.01103 =
         0.00948    0.00006    0.00081   -0.00260
C32   1    0.203259    0.510149    0.042429    11.00000    0.01519    0.01047 =
         0.01063    0.00088    0.00000   -0.00068
C33   1    0.327787    0.573903    0.433581    11.00000    0.04989    0.02902 =
         0.03551    0.00153    0.02083   -0.00315
AFIX  23
H33A  6    0.403744    0.567000    0.489817    11.00000   -1.20000
H33B  6    0.287904    0.539160    0.411525    11.00000   -1.20000
AFIX   0
CL1   5    0.422942    0.430293    0.300862    11.00000    0.02115    0.01956 =
         0.01368    0.00136    0.00422   -0.00795
CL2   5    0.182905    0.324015    0.033136    11.00000    0.02125    0.01154 =
         0.01114   -0.00122    0.00277    0.00053
CL3   5    0.362671    0.604971    0.311567    11.00000    0.09064    0.04421 =
         0.03505   -0.00281    0.03482   -0.01865
CL4   5    0.230141    0.614525    0.497798    11.00000    0.05887    0.04075 =
         0.06558   -0.00038    0.03945    0.00101
HKLF 4 1 1 0 0 0 1 0 0 0 1
 
REM  AT196 in P2(1)/c
REM R1 =  0.0262 for   6184 Fo > 4sig(Fo)  and  0.0348 for all   7209 data
REM    361 parameters refined using      0 restraints
 
END  
     
WGHT      0.0214      4.3378 
REM Highest difference peak  0.837,  deepest hole -0.867,  1-sigma level  0.072
Q1    1  -0.1964  0.4030  0.5598  11.00000  0.05    0.84
Q2    1  -0.4287  0.4105  0.6499  11.00000  0.05    0.78
Q3    1   0.2859  0.3114  0.3599  11.00000  0.05    0.50
Q4    1   0.4364  0.2446  0.2968  11.00000  0.05    0.40
Q5    1   0.1887  0.5372  0.0228  11.00000  0.05    0.39
Q6    1   0.1746  0.3964  0.1633  11.00000  0.05    0.38
Q7    1   0.0820  0.2721  0.2851  11.00000  0.05    0.37
Q8    1   0.2108  0.3642  0.5154  11.00000  0.05    0.37
Q9    1   0.3288  0.4948 -0.0378  11.00000  0.05    0.36
Q10   1  -0.2879  0.4024  0.4693  11.00000  0.05    0.36
Q11   1   0.4926  0.2808  0.4872  11.00000  0.05    0.36
Q12   1   0.1067  0.5070  0.1618  11.00000  0.05    0.35
Q13   1   0.3539  0.4506  0.2776  11.00000  0.05    0.35
Q14   1   0.4772  0.3775  0.2424  11.00000  0.05    0.35
Q15   1   0.0227  0.2312  0.2568  11.00000  0.05    0.35
Q16   1   0.1679  0.5808  0.0517  11.00000  0.05    0.35
Q17   1   0.0265  0.3145  0.3036  11.00000  0.05    0.35
Q18   1   0.3508  0.3940  0.1758  11.00000  0.05    0.35
Q19   1   0.1387  0.3192  0.3242  11.00000  0.05    0.34
Q20   1   0.4020  0.2932  0.4301  11.00000  0.05    0.34
Q21   1   0.1902  0.4045  0.4588  11.00000  0.05    0.34
Q22   1  -0.0854  0.3109  0.2857  11.00000  0.05    0.33
Q23   1  -0.2502  0.4242  0.6238  11.00000  0.05    0.33
Q24   1   0.0574  0.5502  0.1536  11.00000  0.05    0.32
Q25   1   0.5213  0.2240  0.3581  11.00000  0.05    0.32
Q26   1   0.3389  0.5298 -0.1082  11.00000  0.05    0.31
Q27   1  -0.3119  0.4130  0.7046  11.00000  0.05    0.31
Q28   1  -0.1509  0.2774  0.2417  11.00000  0.05    0.31
Q29   1   0.1340  0.4615  0.1357  11.00000  0.05    0.31
Q30   1   0.1699  0.4999  0.0831  11.00000  0.05    0.31
Q31   1  -0.0881  0.2380  0.2371  11.00000  0.05    0.30
Q32   1   0.1589  0.4518  0.6048  11.00000  0.05    0.30
Q33   1   0.2140  0.3710  0.4018  11.00000  0.05    0.30
Q34   1   0.2540  0.5612 -0.1246  11.00000  0.05    0.30
Q35   1   0.3712  0.2720  0.3342  11.00000  0.05    0.29
Q36   1  -0.4714  0.4277  0.5959  11.00000  0.05    0.29
Q37   1   0.3944  0.4869 -0.1017  11.00000  0.05    0.29
Q38   1   0.2016  0.5724 -0.0397  11.00000  0.05    0.28
Q39   1   0.1869  0.4087  0.6640  11.00000  0.05    0.28
Q40   1   0.5620  0.2428  0.4596  11.00000  0.05    0.27
Q41   1   0.4202  0.4398 -0.1315  11.00000  0.05    0.27
Q42   1   0.3282  0.4198  0.1014  11.00000  0.05    0.27
Q43   1   0.3374  0.4187  0.2560  11.00000  0.05    0.27
Q44   1   0.1246  0.5750  0.0156  11.00000  0.05    0.27
Q45   1  -0.3500  0.4378  0.6572  11.00000  0.05    0.27
Q46   1   0.5171  0.4262  0.3227  11.00000  0.05    0.26
Q47   1   0.3500  0.5625 -0.1435  11.00000  0.05    0.25
Q48   1   0.0851  0.2899  0.3565  11.00000  0.05    0.25
Q49   1   0.0588  0.5807  0.0786  11.00000  0.05    0.25
Q50   1   0.1712  0.4507  0.5044  11.00000  0.05    0.24
Q51   1   0.1110  0.3385  0.0347  11.00000  0.05    0.24
Q52   1   0.3513  0.4158 -0.0009  11.00000  0.05    0.24
Q53   1   0.2723  0.3207  0.0476  11.00000  0.05    0.24
Q54   1  -0.2070  0.4193  0.4434  11.00000  0.05    0.24
Q55   1   0.2408  0.4907  0.0058  11.00000  0.05    0.23
Q56   1   0.2922  0.3965  0.4568  11.00000  0.05    0.23
Q57   1   0.4821  0.1874  0.2434  11.00000  0.05    0.23
Q58   1   0.2071  0.3668  0.6167  11.00000  0.05    0.23
Q59   1   0.2734  0.4121  0.0537  11.00000  0.05    0.23
Q60   1   0.1873  0.3230  0.5587  11.00000  0.05    0.22
Q61   1   0.2691  0.3850  0.4734  11.00000  0.05    0.22
Q62   1   0.3105  0.5769 -0.0835  11.00000  0.05    0.22
Q63   1   0.2132  0.3619  0.2603  11.00000  0.05    0.22
Q64   1   0.4441  0.4220 -0.0416  11.00000  0.05    0.21
Q65   1   0.2558  0.3582  0.2785  11.00000  0.05    0.21
Q66   1  -0.1198  0.2576  0.3782  11.00000  0.05    0.21
Q67   1   0.1028  0.2470  0.2124  11.00000  0.05    0.21
Q68   1   0.3081  0.4515  0.0231  11.00000  0.05    0.21
Q69   1   0.0816  0.4393  0.2330  11.00000  0.05    0.21
Q70   1  -0.3036  0.3801  0.7785  11.00000  0.05    0.20
Q71   1  -0.2509  0.3774  0.2446  11.00000  0.05    0.20
Q72   1   0.4767  0.2027  0.2763  11.00000  0.05    0.20
Q73   1  -0.0958  0.2579  0.0903  11.00000  0.05    0.19
Q74   1   0.5220  0.1733  0.1736  11.00000  0.05    0.19
Q75   1   0.2434  0.3537 -0.0023  11.00000  0.05    0.19
Q76   1  -0.2429  0.3801  0.7147  11.00000  0.05    0.19
Q77   1  -0.2486  0.3602  0.5363  11.00000  0.05    0.19
Q78   1   0.0191  0.4304  0.4028  11.00000  0.05    0.19
Q79   1  -0.1867  0.3575  0.7467  11.00000  0.05    0.19
Q80   1  -0.2077  0.4578  0.6437  11.00000  0.05    0.19
Q81   1   0.1322  0.4235  0.1403  11.00000  0.05    0.19
Q82   1   0.4981  0.2428  0.5187  11.00000  0.05    0.18
Q83   1   0.6715  0.2286  0.4529  11.00000  0.05    0.18
Q84   1   0.3280  0.2733  0.3945  11.00000  0.05    0.18
Q85   1  -0.1476  0.4386  0.5873  11.00000  0.05    0.18
Q86   1  -0.3422  0.3682  0.4524  11.00000  0.05    0.18
Q87   1  -0.2355  0.3858  0.3985  11.00000  0.05    0.18
Q88   1  -0.0069  0.2699  0.1402  11.00000  0.05    0.18
Q89   1  -0.2132  0.3817  0.6438  11.00000  0.05    0.18
Q90   1   0.5711  0.4386  0.4014  11.00000  0.05    0.18
Q91   1   0.4762  0.3890  0.3361  11.00000  0.05    0.18
Q92   1   0.1092  0.3974  0.0828  11.00000  0.05    0.18
Q93   1   0.2092  0.3666  0.6983  11.00000  0.05    0.18
Q94   1   0.0679  0.6086  0.0188  11.00000  0.05    0.18
Q95   1   0.3226  0.3713  0.8203  11.00000  0.05    0.18

;

_audit_update_record
;
2013-08-09 # Formatted by publCIF

;

# publcif _publ_body_element loop start
loop_
_publ_body_element
_publ_body_title
_publ_body_contents

 section 
;
Introduction
; 
;

;
 section 
;
Experimental
; 
;

;
 subsection 
;
Synthesis and crystallization
; 
;

;
 subsection 
;
Refinement
;
;
Crystal data, data collection and structure refinement details are summarized
in Table 1.
;

 section 
;
Results and discussion
; 
;

;
# publcif _publ_body_element loop end
 
_audit_creation_method            SHELXL-97 
_chemical_name_systematic 
? 
_chemical_name_common             ? 
_chemical_melting_point           ? 
_chemical_formula_moiety          'C32 H42 Cl2 N P Ru, C H2 Cl2' 
_chemical_formula_sum 
 'C33 H44 Cl4 N P Ru' 
_chemical_formula_weight          728.53
_symmetry_space_group_name_Hall 'P 2ybc' 
 
loop_ 
 _atom_type_symbol 
 _atom_type_description 
 _atom_type_scat_dispersion_real 
 _atom_type_scat_dispersion_imag 
 _atom_type_scat_source 
 'C'  'C'   0.0033   0.0016 
 'International Tables Vol C Tables 4.2.6.8 and 6.1.1.4' 
 'N'  'N'   0.0061   0.0033 
 'International Tables Vol C Tables 4.2.6.8 and 6.1.1.4' 
 'P'  'P'   0.1023   0.0942 
 'International Tables Vol C Tables 4.2.6.8 and 6.1.1.4' 
 'Ru'  'Ru'  -1.2594   0.8363 
 'International Tables Vol C Tables 4.2.6.8 and 6.1.1.4' 
 'Cl'  'Cl'   0.1484   0.1585 
 'International Tables Vol C Tables 4.2.6.8 and 6.1.1.4' 
 'H'  'H'   0.0000   0.0000 
 'International Tables Vol C Tables 4.2.6.8 and 6.1.1.4' 
 
_symmetry_cell_setting           monoclinic
_symmetry_space_group_name_H-M   'P2(1)/c  '
 
loop_ 
 _symmetry_equiv_pos_as_xyz 
 'x, y, z' 
 '-x, y+1/2, -z+1/2' 
 '-x, -y, -z' 
 'x, -y-1/2, z-1/2' 
 
_cell_length_a                    11.2034(3) 
_cell_length_b                    25.0424(7) 
_cell_length_c                    11.8440(3) 
_cell_angle_alpha                 90.00 
_cell_angle_beta                  101.0660(10) 
_cell_angle_gamma                 90.00 
_cell_volume                      3261.17(15) 
_cell_formula_units_Z             4 
_cell_measurement_temperature     100(2) 
_cell_measurement_reflns_used    9237
_cell_measurement_theta_min        2.39
_cell_measurement_theta_max       27.10

_exptl_crystal_description       'block'
_exptl_crystal_colour            'green'
_exptl_crystal_size_max           0.17 
_exptl_crystal_size_mid           0.15 
_exptl_crystal_size_min           0.08 
_exptl_crystal_density_diffrn     1.484 
_exptl_crystal_density_method     'not measured' 
_exptl_crystal_F_000              1504 
_exptl_absorpt_coefficient_mu     0.882 
_exptl_absorpt_correction_type    multi-scan 
_exptl_absorpt_correction_T_min   0.59 
_exptl_absorpt_correction_T_max   0.69
_exptl_absorpt_process_details    SADABS 
 
_exptl_special_details 
? 
 
_diffrn_ambient_temperature       100(2) 
_diffrn_radiation_wavelength      0.71073 
_diffrn_radiation_type            MoK\a 
_diffrn_radiation_source          'fine-focus sealed tube' 
_diffrn_radiation_monochromator   graphite 
_diffrn_measurement_device_type  'Bruker APEX-II CCD'
_diffrn_measurement_method       '\f and \w scans'
_diffrn_detector_area_resol_mean  ? 
_diffrn_reflns_number             177965 
_diffrn_reflns_av_R_equivalents   0.0558 
_diffrn_reflns_av_sigmaI/netI     0.0210 
_diffrn_reflns_limit_h_min        -13 
_diffrn_reflns_limit_h_max        14 
_diffrn_reflns_limit_k_min        -32 
_diffrn_reflns_limit_k_max        32 
_diffrn_reflns_limit_l_min        -15 
_diffrn_reflns_limit_l_max        15 
_diffrn_reflns_theta_min          1.93 
_diffrn_reflns_theta_max          27.13 
_reflns_number_total              7209 
_reflns_number_gt                 6184 
_reflns_threshold_expression      >2sigma(I) 
 
_computing_data_collection      'Bruker APEX2'
_computing_cell_refinement      'Bruker SAINT'
_computing_data_reduction       'Bruker SAINT'  
_computing_structure_solution   'SHELXS-97 (Sheldrick, 2008)'
_computing_structure_refinement 'SHELXL-97 (Sheldrick, 2008)'
_computing_molecular_graphics   'Bruker SHELXTL'
_computing_publication_material 'Bruker SHELXTL'
 
_refine_special_details 
; 
 Refinement of F^2^ against ALL reflections.  The weighted R-factor wR and 
 goodness of fit S are based on F^2^, conventional R-factors R are based 
 on F, with F set to zero for negative F^2^. The threshold expression of 
 F^2^ > 2sigma(F^2^) is used only for calculating R-factors(gt) etc. and is 
 not relevant to the choice of reflections for refinement.  R-factors based 
 on F^2^ are statistically about twice as large as those based on F, and R- 
 factors based on ALL data will be even larger. 
; 
 
_refine_ls_structure_factor_coef  Fsqd  
_refine_ls_matrix_type            full 
_refine_ls_weighting_scheme       calc  
_refine_ls_weighting_details 
 'calc w=1/[\s^2^(Fo^2^)+(0.0225P)^2^+4.2706P] where P=(Fo^2^+2Fc^2^)/3' 
_atom_sites_solution_primary      direct 
_atom_sites_solution_secondary    difmap 
_atom_sites_solution_hydrogens    geom 
_refine_ls_hydrogen_treatment     constr
_refine_ls_extinction_method      none 
_refine_ls_extinction_coef        ? 
_refine_ls_number_reflns          7209 
_refine_ls_number_parameters      361 
_refine_ls_number_restraints      0 
_refine_ls_R_factor_all           0.0348 
_refine_ls_R_factor_gt            0.0262 
_refine_ls_wR_factor_ref          0.0613 
_refine_ls_wR_factor_gt           0.0571 
_refine_ls_goodness_of_fit_ref    1.031 
_refine_ls_restrained_S_all       1.031 
_refine_ls_shift/su_max           0.002 
_refine_ls_shift/su_mean          0.000 
 
loop_ 
 _atom_site_label 
 _atom_site_type_symbol 
 _atom_site_fract_x 
 _atom_site_fract_y 
 _atom_site_fract_z 
 _atom_site_U_iso_or_equiv 
 _atom_site_adp_type 
 _atom_site_occupancy 
 _atom_site_symmetry_multiplicity 
 _atom_site_calc_flag 
 _atom_site_refinement_flags 
 _atom_site_disorder_assembly 
 _atom_site_disorder_group 
Ru1 Ru 0.264417(14) 0.387663(6) 0.172926(12) 0.00961(5) Uani 1 1 d . . . 
P1 P 0.22205(4) 0.339054(19) 0.32998(4) 0.00922(10) Uani 1 1 d . . . 
C1 C 0.22550(18) 0.37953(7) 0.46256(16) 0.0120(4) Uani 1 1 d . . . 
H1 H 0.3134 0.3880 0.4909 0.014 Uiso 1 1 calc R . . 
C2 C 0.1614(2) 0.43430(8) 0.44616(17) 0.0173(4) Uani 1 1 d . . . 
H2A H 0.1902 0.4544 0.3846 0.021 Uiso 1 1 calc R . . 
H2B H 0.0725 0.4290 0.4223 0.021 Uiso 1 1 calc R . . 
C3 C 0.1879(2) 0.46650(8) 0.55838(18) 0.0198(4) Uani 1 1 d . . . 
H3A H 0.2757 0.4753 0.5771 0.024 Uiso 1 1 calc R . . 
H3B H 0.1418 0.5004 0.5477 0.024 Uiso 1 1 calc R . . 
C4 C 0.1531(2) 0.43553(8) 0.65819(17) 0.0180(4) Uani 1 1 d . . . 
H4A H 0.1764 0.4564 0.7300 0.022 Uiso 1 1 calc R . . 
H4B H 0.0639 0.4303 0.6437 0.022 Uiso 1 1 calc R . . 
C5 C 0.2162(2) 0.38128(8) 0.67308(17) 0.0173(4) Uani 1 1 d . . . 
H5A H 0.1894 0.3614 0.7361 0.021 Uiso 1 1 calc R . . 
H5B H 0.3053 0.3865 0.6944 0.021 Uiso 1 1 calc R . . 
C6 C 0.18605(18) 0.34890(8) 0.56181(16) 0.0142(4) Uani 1 1 d . . . 
H6A H 0.0975 0.3420 0.5427 0.017 Uiso 1 1 calc R . . 
H6B H 0.2285 0.3141 0.5725 0.017 Uiso 1 1 calc R . . 
C7 C 0.08259(17) 0.29773(7) 0.31938(16) 0.0116(4) Uani 1 1 d . . . 
H7 H 0.0809 0.2850 0.3991 0.014 Uiso 1 1 calc R . . 
C8 C 0.07934(18) 0.24751(8) 0.24438(18) 0.0156(4) Uani 1 1 d . . . 
H8A H 0.0778 0.2581 0.1636 0.019 Uiso 1 1 calc R . . 
H8B H 0.1536 0.2261 0.2710 0.019 Uiso 1 1 calc R . . 
C9 C -0.03335(19) 0.21377(8) 0.25102(19) 0.0188(4) Uani 1 1 d . . . 
H9A H -0.0356 0.1824 0.1999 0.023 Uiso 1 1 calc R . . 
H9B H -0.0278 0.2006 0.3307 0.023 Uiso 1 1 calc R . . 
C10 C -0.15018(19) 0.24583(9) 0.21560(19) 0.0220(5) Uani 1 1 d . . . 
H10A H -0.1608 0.2554 0.1332 0.026 Uiso 1 1 calc R . . 
H10B H -0.2205 0.2237 0.2260 0.026 Uiso 1 1 calc R . . 
C11 C -0.14670(19) 0.29654(9) 0.2872(2) 0.0209(5) Uani 1 1 d . . . 
H11A H -0.1461 0.2869 0.3684 0.025 Uiso 1 1 calc R . . 
H11B H -0.2209 0.3178 0.2590 0.025 Uiso 1 1 calc R . . 
C12 C -0.03411(18) 0.33034(8) 0.28083(19) 0.0172(4) Uani 1 1 d . . . 
H12A H -0.0326 0.3621 0.3308 0.021 Uiso 1 1 calc R . . 
H12B H -0.0383 0.3428 0.2009 0.021 Uiso 1 1 calc R . . 
C13 C 0.34283(17) 0.28784(7) 0.37667(16) 0.0106(4) Uani 1 1 d . . . 
H13 H 0.3030 0.2569 0.4078 0.013 Uiso 1 1 calc R . . 
C14 C 0.39240(18) 0.26732(8) 0.27206(16) 0.0142(4) Uani 1 1 d . . . 
H14A H 0.3238 0.2564 0.2107 0.017 Uiso 1 1 calc R . . 
H14B H 0.4370 0.2964 0.2415 0.017 Uiso 1 1 calc R . . 
C15 C 0.47735(19) 0.21987(8) 0.30557(18) 0.0182(4) Uani 1 1 d . . . 
H15A H 0.5098 0.2080 0.2377 0.022 Uiso 1 1 calc R . . 
H15B H 0.4309 0.1899 0.3304 0.022 Uiso 1 1 calc R . . 
C16 C 0.58295(19) 0.23424(9) 0.40270(18) 0.0207(4) Uani 1 1 d . . . 
H16A H 0.6319 0.2019 0.4272 0.025 Uiso 1 1 calc R . . 
H16B H 0.6362 0.2606 0.3745 0.025 Uiso 1 1 calc R . . 
C17 C 0.53679(19) 0.25745(9) 0.50523(17) 0.0186(4) Uani 1 1 d . . . 
H17A H 0.6069 0.2693 0.5639 0.022 Uiso 1 1 calc R . . 
H17B H 0.4935 0.2293 0.5401 0.022 Uiso 1 1 calc R . . 
C18 C 0.45063(17) 0.30488(8) 0.47051(17) 0.0150(4) Uani 1 1 d . . . 
H18A H 0.4953 0.3344 0.4415 0.018 Uiso 1 1 calc R . . 
H18B H 0.4202 0.3180 0.5386 0.018 Uiso 1 1 calc R . . 
N1 N 0.32324(15) 0.42905(6) 0.03660(13) 0.0124(3) Uani 1 1 d . . . 
C19 C 0.14043(18) 0.43539(8) 0.16786(16) 0.0127(4) Uani 1 1 d . . . 
H19 H 0.0734 0.4238 0.2000 0.015 Uiso 1 1 calc R . . 
C20 C 0.13207(17) 0.48914(8) 0.12041(16) 0.0127(4) Uani 1 1 d . . . 
C21 C 0.04612(19) 0.52201(8) 0.15622(17) 0.0165(4) Uani 1 1 d . . . 
H21 H -0.0020 0.5078 0.2069 0.020 Uiso 1 1 calc R . . 
C22 C 0.02795(19) 0.57496(8) 0.12053(18) 0.0185(4) Uani 1 1 d . . . 
H22 H -0.0300 0.5966 0.1481 0.022 Uiso 1 1 calc R . . 
C23 C 0.09487(19) 0.59536(8) 0.04514(18) 0.0176(4) Uani 1 1 d . . . 
H23 H 0.0832 0.6314 0.0207 0.021 Uiso 1 1 calc R . . 
C24 C 0.18069(18) 0.56368(8) 0.00341(17) 0.0155(4) Uani 1 1 d . . . 
C25 C 0.24158(19) 0.58485(8) -0.08316(18) 0.0188(4) Uani 1 1 d . . . 
H25 H 0.2272 0.6209 -0.1072 0.023 Uiso 1 1 calc R . . 
C26 C 0.31832(19) 0.55502(8) -0.13096(18) 0.0183(4) Uani 1 1 d . . . 
H26 H 0.3535 0.5695 -0.1912 0.022 Uiso 1 1 calc R . . 
C27 C 0.34760(18) 0.50162(8) -0.09186(16) 0.0139(4) Uani 1 1 d . . . 
C28 C 0.43287(18) 0.47122(8) -0.13687(17) 0.0157(4) Uani 1 1 d . . . 
H28 H 0.4699 0.4853 -0.1962 0.019 Uiso 1 1 calc R . . 
C29 C 0.46217(18) 0.42098(8) -0.09448(17) 0.0159(4) Uani 1 1 d . . . 
H29 H 0.5203 0.3999 -0.1231 0.019 Uiso 1 1 calc R . . 
C30 C 0.40470(18) 0.40163(8) -0.00849(17) 0.0154(4) Uani 1 1 d . . . 
H30 H 0.4248 0.3666 0.0199 0.019 Uiso 1 1 calc R . . 
C31 C 0.29209(17) 0.47941(8) -0.00384(16) 0.0118(4) Uani 1 1 d . . . 
C32 C 0.20326(17) 0.51015(8) 0.04243(16) 0.0124(4) Uani 1 1 d . . . 
C33 C 0.3278(3) 0.57390(11) 0.4336(2) 0.0365(6) Uani 1 1 d . . . 
H33A H 0.4037 0.5670 0.4898 0.044 Uiso 1 1 calc R . . 
H33B H 0.2879 0.5392 0.4115 0.044 Uiso 1 1 calc R . . 
Cl1 Cl 0.42294(5) 0.43029(2) 0.30086(4) 0.01801(11) Uani 1 1 d . . . 
Cl2 Cl 0.18291(4) 0.324015(18) 0.03314(4) 0.01469(10) Uani 1 1 d . . . 
Cl3 Cl 0.36267(9) 0.60497(3) 0.31157(6) 0.0536(2) Uani 1 1 d . . . 
Cl4 Cl 0.23014(8) 0.61452(3) 0.49780(7) 0.0514(2) Uani 1 1 d . . . 
 
loop_ 
 _atom_site_aniso_label 
 _atom_site_aniso_U_11 
 _atom_site_aniso_U_22 
 _atom_site_aniso_U_33 
 _atom_site_aniso_U_23 
 _atom_site_aniso_U_13 
 _atom_site_aniso_U_12 
Ru1 0.01351(8) 0.00792(8) 0.00821(8) 0.00075(6) 0.00411(5) 0.00065(6) 
P1 0.0119(2) 0.0079(2) 0.0084(2) 0.00015(18) 0.00337(17) -0.00005(17) 
C1 0.0171(10) 0.0104(9) 0.0094(9) -0.0005(7) 0.0052(7) -0.0003(7) 
C2 0.0274(11) 0.0110(10) 0.0145(10) -0.0007(8) 0.0064(8) 0.0024(8) 
C3 0.0307(12) 0.0127(10) 0.0171(10) -0.0035(8) 0.0075(9) 0.0008(9) 
C4 0.0232(11) 0.0183(10) 0.0135(10) -0.0052(8) 0.0060(8) -0.0008(8) 
C5 0.0250(11) 0.0170(10) 0.0110(9) -0.0015(8) 0.0060(8) -0.0026(8) 
C6 0.0192(10) 0.0133(10) 0.0116(9) -0.0004(7) 0.0063(8) -0.0010(8) 
C7 0.0134(9) 0.0101(9) 0.0118(9) 0.0015(7) 0.0039(7) -0.0013(7) 
C8 0.0161(10) 0.0125(10) 0.0183(10) -0.0031(8) 0.0036(8) -0.0030(8) 
C9 0.0205(11) 0.0147(10) 0.0206(11) -0.0028(8) 0.0029(8) -0.0064(8) 
C10 0.0160(11) 0.0253(12) 0.0230(11) 0.0036(9) -0.0006(8) -0.0071(9) 
C11 0.0144(10) 0.0212(11) 0.0278(12) 0.0070(9) 0.0055(9) 0.0011(8) 
C12 0.0147(10) 0.0145(10) 0.0235(11) 0.0041(8) 0.0062(8) 0.0012(8) 
C13 0.0128(9) 0.0097(9) 0.0094(9) 0.0007(7) 0.0024(7) -0.0001(7) 
C14 0.0177(10) 0.0148(10) 0.0109(9) -0.0001(8) 0.0045(7) 0.0021(8) 
C15 0.0232(11) 0.0158(10) 0.0160(10) -0.0005(8) 0.0051(8) 0.0072(8) 
C16 0.0163(10) 0.0233(11) 0.0224(11) 0.0011(9) 0.0031(8) 0.0066(8) 
C17 0.0156(10) 0.0245(11) 0.0143(10) -0.0005(8) -0.0006(8) 0.0042(8) 
C18 0.0145(10) 0.0162(10) 0.0136(9) -0.0010(8) 0.0011(7) 0.0000(8) 
N1 0.0163(8) 0.0122(8) 0.0095(8) -0.0005(6) 0.0041(6) -0.0018(6) 
C19 0.0163(10) 0.0127(9) 0.0105(9) -0.0010(7) 0.0059(7) -0.0003(7) 
C20 0.0153(9) 0.0112(9) 0.0114(9) 0.0003(7) 0.0023(7) 0.0008(7) 
C21 0.0221(11) 0.0142(10) 0.0141(10) -0.0001(8) 0.0061(8) 0.0005(8) 
C22 0.0234(11) 0.0127(10) 0.0194(11) -0.0013(8) 0.0041(8) 0.0054(8) 
C23 0.0226(11) 0.0086(9) 0.0203(11) 0.0023(8) 0.0006(8) 0.0026(8) 
C24 0.0157(10) 0.0135(10) 0.0155(10) 0.0017(8) -0.0014(8) -0.0011(8) 
C25 0.0193(10) 0.0138(10) 0.0217(11) 0.0093(8) 0.0003(8) -0.0009(8) 
C26 0.0193(10) 0.0194(11) 0.0167(10) 0.0077(8) 0.0046(8) -0.0027(8) 
C27 0.0147(9) 0.0150(10) 0.0113(9) 0.0009(7) 0.0010(7) -0.0043(7) 
C28 0.0178(10) 0.0197(10) 0.0100(9) -0.0007(8) 0.0039(7) -0.0072(8) 
C29 0.0185(10) 0.0164(10) 0.0144(10) -0.0041(8) 0.0073(8) -0.0025(8) 
C30 0.0202(10) 0.0122(10) 0.0148(10) 0.0002(8) 0.0056(8) 0.0000(8) 
C31 0.0142(9) 0.0110(9) 0.0095(9) 0.0001(7) 0.0008(7) -0.0026(7) 
C32 0.0152(9) 0.0105(9) 0.0106(9) 0.0009(7) 0.0000(7) -0.0007(7) 
C33 0.0499(17) 0.0290(14) 0.0355(15) 0.0015(11) 0.0208(12) -0.0032(12) 
Cl1 0.0212(2) 0.0196(2) 0.0137(2) 0.00136(19) 0.00422(18) -0.00795(19) 
Cl2 0.0212(2) 0.0115(2) 0.0111(2) -0.00122(17) 0.00277(18) 0.00053(18) 
Cl3 0.0906(6) 0.0442(4) 0.0351(4) -0.0028(3) 0.0348(4) -0.0186(4) 
Cl4 0.0589(5) 0.0408(4) 0.0656(5) -0.0004(4) 0.0394(4) 0.0010(3) 
 
_geom_special_details 
; 
 All esds (except the esd in the dihedral angle between two l.s. planes) 
 are estimated using the full covariance matrix.  The cell esds are taken 
 into account individually in the estimation of esds in distances, angles 
 and torsion angles; correlations between esds in cell parameters are only 
 used when they are defined by crystal symmetry.  An approximate (isotropic) 
 treatment of cell esds is used for estimating esds involving l.s. planes. 
; 
 
loop_ 
 _geom_bond_atom_site_label_1 
 _geom_bond_atom_site_label_2 
 _geom_bond_distance 
 _geom_bond_site_symmetry_2 
 _geom_bond_publ_flag 
Ru1 C19 1.8247(19) . ? 
Ru1 N1 2.1269(16) . ? 
Ru1 P1 2.3465(5) . ? 
Ru1 Cl2 2.3527(5) . ? 
Ru1 Cl1 2.3573(5) . ? 
P1 C7 1.8581(19) . ? 
P1 C1 1.8632(19) . ? 
P1 C13 1.8693(19) . ? 
C1 C6 1.538(3) . ? 
C1 C2 1.543(3) . ? 
C1 H1 1.0000 . ? 
C2 C3 1.534(3) . ? 
C2 H2A 0.9900 . ? 
C2 H2B 0.9900 . ? 
C3 C4 1.526(3) . ? 
C3 H3A 0.9900 . ? 
C3 H3B 0.9900 . ? 
C4 C5 1.526(3) . ? 
C4 H4A 0.9900 . ? 
C4 H4B 0.9900 . ? 
C5 C6 1.529(3) . ? 
C5 H5A 0.9900 . ? 
C5 H5B 0.9900 . ? 
C6 H6A 0.9900 . ? 
C6 H6B 0.9900 . ? 
C7 C12 1.535(3) . ? 
C7 C8 1.536(3) . ? 
C7 H7 1.0000 . ? 
C8 C9 1.534(3) . ? 
C8 H8A 0.9900 . ? 
C8 H8B 0.9900 . ? 
C9 C10 1.524(3) . ? 
C9 H9A 0.9900 . ? 
C9 H9B 0.9900 . ? 
C10 C11 1.524(3) . ? 
C10 H10A 0.9900 . ? 
C10 H10B 0.9900 . ? 
C11 C12 1.533(3) . ? 
C11 H11A 0.9900 . ? 
C11 H11B 0.9900 . ? 
C12 H12A 0.9900 . ? 
C12 H12B 0.9900 . ? 
C13 C18 1.536(3) . ? 
C13 C14 1.540(3) . ? 
C13 H13 1.0000 . ? 
C14 C15 1.527(3) . ? 
C14 H14A 0.9900 . ? 
C14 H14B 0.9900 . ? 
C15 C16 1.526(3) . ? 
C15 H15A 0.9900 . ? 
C15 H15B 0.9900 . ? 
C16 C17 1.524(3) . ? 
C16 H16A 0.9900 . ? 
C16 H16B 0.9900 . ? 
C17 C18 1.536(3) . ? 
C17 H17A 0.9900 . ? 
C17 H17B 0.9900 . ? 
C18 H18A 0.9900 . ? 
C18 H18B 0.9900 . ? 
N1 C30 1.333(3) . ? 
N1 C31 1.370(2) . ? 
C19 C20 1.455(3) . ? 
C19 H19 0.9500 . ? 
C20 C21 1.393(3) . ? 
C20 C32 1.431(3) . ? 
C21 C22 1.395(3) . ? 
C21 H21 0.9500 . ? 
C22 C23 1.370(3) . ? 
C22 H22 0.9500 . ? 
C23 C24 1.407(3) . ? 
C23 H23 0.9500 . ? 
C24 C32 1.425(3) . ? 
C24 C25 1.437(3) . ? 
C25 C26 1.343(3) . ? 
C25 H25 0.9500 . ? 
C26 C27 1.432(3) . ? 
C26 H26 0.9500 . ? 
C27 C28 1.404(3) . ? 
C27 C31 1.425(3) . ? 
C28 C29 1.371(3) . ? 
C28 H28 0.9500 . ? 
C29 C30 1.392(3) . ? 
C29 H29 0.9500 . ? 
C30 H30 0.9500 . ? 
C31 C32 1.447(3) . ? 
C33 Cl3 1.750(3) . ? 
C33 Cl4 1.769(3) . ? 
C33 H33A 0.9900 . ? 
C33 H33B 0.9900 . ? 
 
loop_ 
 _geom_angle_atom_site_label_1 
 _geom_angle_atom_site_label_2 
 _geom_angle_atom_site_label_3 
 _geom_angle 
 _geom_angle_site_symmetry_1 
 _geom_angle_site_symmetry_3 
 _geom_angle_publ_flag 
C19 Ru1 N1 90.04(7) . . ? 
C19 Ru1 P1 95.58(6) . . ? 
N1 Ru1 P1 173.64(5) . . ? 
C19 Ru1 Cl2 103.32(6) . . ? 
N1 Ru1 Cl2 86.03(4) . . ? 
P1 Ru1 Cl2 95.519(17) . . ? 
C19 Ru1 Cl1 101.50(6) . . ? 
N1 Ru1 Cl1 87.84(4) . . ? 
P1 Ru1 Cl1 88.135(17) . . ? 
Cl2 Ru1 Cl1 154.415(19) . . ? 
C7 P1 C1 103.95(9) . . ? 
C7 P1 C13 100.92(8) . . ? 
C1 P1 C13 103.13(8) . . ? 
C7 P1 Ru1 122.06(6) . . ? 
C1 P1 Ru1 114.29(6) . . ? 
C13 P1 Ru1 110.20(6) . . ? 
C6 C1 C2 110.14(16) . . ? 
C6 C1 P1 114.24(13) . . ? 
C2 C1 P1 116.33(13) . . ? 
C6 C1 H1 105.0 . . ? 
C2 C1 H1 105.0 . . ? 
P1 C1 H1 105.0 . . ? 
C3 C2 C1 110.48(17) . . ? 
C3 C2 H2A 109.6 . . ? 
C1 C2 H2A 109.6 . . ? 
C3 C2 H2B 109.6 . . ? 
C1 C2 H2B 109.6 . . ? 
H2A C2 H2B 108.1 . . ? 
C4 C3 C2 111.60(17) . . ? 
C4 C3 H3A 109.3 . . ? 
C2 C3 H3A 109.3 . . ? 
C4 C3 H3B 109.3 . . ? 
C2 C3 H3B 109.3 . . ? 
H3A C3 H3B 108.0 . . ? 
C5 C4 C3 111.13(17) . . ? 
C5 C4 H4A 109.4 . . ? 
C3 C4 H4A 109.4 . . ? 
C5 C4 H4B 109.4 . . ? 
C3 C4 H4B 109.4 . . ? 
H4A C4 H4B 108.0 . . ? 
C4 C5 C6 110.60(17) . . ? 
C4 C5 H5A 109.5 . . ? 
C6 C5 H5A 109.5 . . ? 
C4 C5 H5B 109.5 . . ? 
C6 C5 H5B 109.5 . . ? 
H5A C5 H5B 108.1 . . ? 
C5 C6 C1 110.25(16) . . ? 
C5 C6 H6A 109.6 . . ? 
C1 C6 H6A 109.6 . . ? 
C5 C6 H6B 109.6 . . ? 
C1 C6 H6B 109.6 . . ? 
H6A C6 H6B 108.1 . . ? 
C12 C7 C8 109.83(16) . . ? 
C12 C7 P1 112.39(13) . . ? 
C8 C7 P1 114.92(13) . . ? 
C12 C7 H7 106.4 . . ? 
C8 C7 H7 106.4 . . ? 
P1 C7 H7 106.4 . . ? 
C9 C8 C7 110.47(16) . . ? 
C9 C8 H8A 109.6 . . ? 
C7 C8 H8A 109.6 . . ? 
C9 C8 H8B 109.6 . . ? 
C7 C8 H8B 109.6 . . ? 
H8A C8 H8B 108.1 . . ? 
C10 C9 C8 111.57(17) . . ? 
C10 C9 H9A 109.3 . . ? 
C8 C9 H9A 109.3 . . ? 
C10 C9 H9B 109.3 . . ? 
C8 C9 H9B 109.3 . . ? 
H9A C9 H9B 108.0 . . ? 
C11 C10 C9 110.91(17) . . ? 
C11 C10 H10A 109.5 . . ? 
C9 C10 H10A 109.5 . . ? 
C11 C10 H10B 109.5 . . ? 
C9 C10 H10B 109.5 . . ? 
H10A C10 H10B 108.0 . . ? 
C10 C11 C12 111.47(18) . . ? 
C10 C11 H11A 109.3 . . ? 
C12 C11 H11A 109.3 . . ? 
C10 C11 H11B 109.3 . . ? 
C12 C11 H11B 109.3 . . ? 
H11A C11 H11B 108.0 . . ? 
C11 C12 C7 110.70(16) . . ? 
C11 C12 H12A 109.5 . . ? 
C7 C12 H12A 109.5 . . ? 
C11 C12 H12B 109.5 . . ? 
C7 C12 H12B 109.5 . . ? 
H12A C12 H12B 108.1 . . ? 
C18 C13 C14 108.65(15) . . ? 
C18 C13 P1 116.58(13) . . ? 
C14 C13 P1 110.08(12) . . ? 
C18 C13 H13 107.0 . . ? 
C14 C13 H13 107.0 . . ? 
P1 C13 H13 107.0 . . ? 
C15 C14 C13 110.71(16) . . ? 
C15 C14 H14A 109.5 . . ? 
C13 C14 H14A 109.5 . . ? 
C15 C14 H14B 109.5 . . ? 
C13 C14 H14B 109.5 . . ? 
H14A C14 H14B 108.1 . . ? 
C14 C15 C16 111.52(17) . . ? 
C14 C15 H15A 109.3 . . ? 
C16 C15 H15A 109.3 . . ? 
C14 C15 H15B 109.3 . . ? 
C16 C15 H15B 109.3 . . ? 
H15A C15 H15B 108.0 . . ? 
C17 C16 C15 110.98(17) . . ? 
C17 C16 H16A 109.4 . . ? 
C15 C16 H16A 109.4 . . ? 
C17 C16 H16B 109.4 . . ? 
C15 C16 H16B 109.4 . . ? 
H16A C16 H16B 108.0 . . ? 
C16 C17 C18 111.95(17) . . ? 
C16 C17 H17A 109.2 . . ? 
C18 C17 H17A 109.2 . . ? 
C16 C17 H17B 109.2 . . ? 
C18 C17 H17B 109.2 . . ? 
H17A C17 H17B 107.9 . . ? 
C17 C18 C13 110.21(16) . . ? 
C17 C18 H18A 109.6 . . ? 
C13 C18 H18A 109.6 . . ? 
C17 C18 H18B 109.6 . . ? 
C13 C18 H18B 109.6 . . ? 
H18A C18 H18B 108.1 . . ? 
C30 N1 C31 118.82(16) . . ? 
C30 N1 Ru1 112.88(13) . . ? 
C31 N1 Ru1 128.21(13) . . ? 
C20 C19 Ru1 127.66(14) . . ? 
C20 C19 H19 116.2 . . ? 
Ru1 C19 H19 116.2 . . ? 
C21 C20 C32 118.85(18) . . ? 
C21 C20 C19 115.21(17) . . ? 
C32 C20 C19 125.94(17) . . ? 
C20 C21 C22 122.59(19) . . ? 
C20 C21 H21 118.7 . . ? 
C22 C21 H21 118.7 . . ? 
C23 C22 C21 119.06(19) . . ? 
C23 C22 H22 120.5 . . ? 
C21 C22 H22 120.5 . . ? 
C22 C23 C24 120.99(19) . . ? 
C22 C23 H23 119.5 . . ? 
C24 C23 H23 119.5 . . ? 
C23 C24 C32 120.47(19) . . ? 
C23 C24 C25 119.50(18) . . ? 
C32 C24 C25 119.96(19) . . ? 
C26 C25 C24 121.69(19) . . ? 
C26 C25 H25 119.2 . . ? 
C24 C25 H25 119.2 . . ? 
C25 C26 C27 120.55(19) . . ? 
C25 C26 H26 119.7 . . ? 
C27 C26 H26 119.7 . . ? 
C28 C27 C31 119.36(18) . . ? 
C28 C27 C26 120.90(18) . . ? 
C31 C27 C26 119.72(18) . . ? 
C29 C28 C27 119.40(18) . . ? 
C29 C28 H28 120.3 . . ? 
C27 C28 H28 120.3 . . ? 
C28 C29 C30 118.40(19) . . ? 
C28 C29 H29 120.8 . . ? 
C30 C29 H29 120.8 . . ? 
N1 C30 C29 124.20(19) . . ? 
N1 C30 H30 117.9 . . ? 
C29 C30 H30 117.9 . . ? 
N1 C31 C27 119.81(18) . . ? 
N1 C31 C32 120.32(17) . . ? 
C27 C31 C32 119.86(17) . . ? 
C24 C32 C20 117.97(18) . . ? 
C24 C32 C31 118.03(17) . . ? 
C20 C32 C31 123.91(17) . . ? 
Cl3 C33 Cl4 110.73(15) . . ? 
Cl3 C33 H33A 109.5 . . ? 
Cl4 C33 H33A 109.5 . . ? 
Cl3 C33 H33B 109.5 . . ? 
Cl4 C33 H33B 109.5 . . ? 
H33A C33 H33B 108.1 . . ? 
 
loop_ 
 _geom_torsion_atom_site_label_1 
 _geom_torsion_atom_site_label_2 
 _geom_torsion_atom_site_label_3 
 _geom_torsion_atom_site_label_4 
 _geom_torsion 
 _geom_torsion_site_symmetry_1 
 _geom_torsion_site_symmetry_2 
 _geom_torsion_site_symmetry_3 
 _geom_torsion_site_symmetry_4 
 _geom_torsion_publ_flag 
C19 Ru1 P1 C7 68.15(9) . . . . ? 
Cl2 Ru1 P1 C7 -35.86(7) . . . . ? 
Cl1 Ru1 P1 C7 169.52(7) . . . . ? 
C19 Ru1 P1 C1 -58.34(9) . . . . ? 
Cl2 Ru1 P1 C1 -162.35(7) . . . . ? 
Cl1 Ru1 P1 C1 43.03(7) . . . . ? 
C19 Ru1 P1 C13 -173.91(9) . . . . ? 
Cl2 Ru1 P1 C13 82.08(7) . . . . ? 
Cl1 Ru1 P1 C13 -72.54(7) . . . . ? 
C7 P1 C1 C6 39.14(16) . . . . ? 
C13 P1 C1 C6 -65.83(16) . . . . ? 
Ru1 P1 C1 C6 174.54(12) . . . . ? 
C7 P1 C1 C2 -90.96(16) . . . . ? 
C13 P1 C1 C2 164.07(15) . . . . ? 
Ru1 P1 C1 C2 44.45(16) . . . . ? 
C6 C1 C2 C3 56.6(2) . . . . ? 
P1 C1 C2 C3 -171.39(14) . . . . ? 
C1 C2 C3 C4 -55.3(2) . . . . ? 
C2 C3 C4 C5 55.4(2) . . . . ? 
C3 C4 C5 C6 -56.8(2) . . . . ? 
C4 C5 C6 C1 58.5(2) . . . . ? 
C2 C1 C6 C5 -58.4(2) . . . . ? 
P1 C1 C6 C5 168.51(14) . . . . ? 
C1 P1 C7 C12 73.70(15) . . . . ? 
C13 P1 C7 C12 -179.67(14) . . . . ? 
Ru1 P1 C7 C12 -57.27(15) . . . . ? 
C1 P1 C7 C8 -159.71(14) . . . . ? 
C13 P1 C7 C8 -53.08(15) . . . . ? 
Ru1 P1 C7 C8 69.32(15) . . . . ? 
C12 C7 C8 C9 -57.5(2) . . . . ? 
P1 C7 C8 C9 174.57(14) . . . . ? 
C7 C8 C9 C10 56.8(2) . . . . ? 
C8 C9 C10 C11 -55.3(2) . . . . ? 
C9 C10 C11 C12 55.1(2) . . . . ? 
C10 C11 C12 C7 -56.7(2) . . . . ? 
C8 C7 C12 C11 57.6(2) . . . . ? 
P1 C7 C12 C11 -173.14(14) . . . . ? 
C7 P1 C13 C18 -138.02(14) . . . . ? 
C1 P1 C13 C18 -30.74(16) . . . . ? 
Ru1 P1 C13 C18 91.66(14) . . . . ? 
C7 P1 C13 C14 97.67(14) . . . . ? 
C1 P1 C13 C14 -155.05(13) . . . . ? 
Ru1 P1 C13 C14 -32.64(14) . . . . ? 
C18 C13 C14 C15 59.5(2) . . . . ? 
P1 C13 C14 C15 -171.70(14) . . . . ? 
C13 C14 C15 C16 -57.5(2) . . . . ? 
C14 C15 C16 C17 53.9(2) . . . . ? 
C15 C16 C17 C18 -53.9(2) . . . . ? 
C16 C17 C18 C13 57.2(2) . . . . ? 
C14 C13 C18 C17 -59.0(2) . . . . ? 
P1 C13 C18 C17 175.99(13) . . . . ? 
C19 Ru1 N1 C30 -167.49(14) . . . . ? 
Cl2 Ru1 N1 C30 -64.13(13) . . . . ? 
Cl1 Ru1 N1 C30 91.01(13) . . . . ? 
C19 Ru1 N1 C31 15.81(17) . . . . ? 
Cl2 Ru1 N1 C31 119.16(16) . . . . ? 
Cl1 Ru1 N1 C31 -85.70(16) . . . . ? 
N1 Ru1 C19 C20 -21.18(17) . . . . ? 
P1 Ru1 C19 C20 155.86(16) . . . . ? 
Cl2 Ru1 C19 C20 -107.11(17) . . . . ? 
Cl1 Ru1 C19 C20 66.63(17) . . . . ? 
Ru1 C19 C20 C21 -162.44(15) . . . . ? 
Ru1 C19 C20 C32 17.4(3) . . . . ? 
C32 C20 C21 C22 -1.1(3) . . . . ? 
C19 C20 C21 C22 178.84(19) . . . . ? 
C20 C21 C22 C23 1.6(3) . . . . ? 
C21 C22 C23 C24 0.2(3) . . . . ? 
C22 C23 C24 C32 -2.5(3) . . . . ? 
C22 C23 C24 C25 174.6(2) . . . . ? 
C23 C24 C25 C26 -175.7(2) . . . . ? 
C32 C24 C25 C26 1.4(3) . . . . ? 
C24 C25 C26 C27 -3.7(3) . . . . ? 
C25 C26 C27 C28 -176.4(2) . . . . ? 
C25 C26 C27 C31 1.8(3) . . . . ? 
C31 C27 C28 C29 -0.7(3) . . . . ? 
C26 C27 C28 C29 177.57(19) . . . . ? 
C27 C28 C29 C30 0.7(3) . . . . ? 
C31 N1 C30 C29 0.6(3) . . . . ? 
Ru1 N1 C30 C29 -176.45(16) . . . . ? 
C28 C29 C30 N1 -0.7(3) . . . . ? 
C30 N1 C31 C27 -0.6(3) . . . . ? 
Ru1 N1 C31 C27 175.97(13) . . . . ? 
C30 N1 C31 C32 179.48(18) . . . . ? 
Ru1 N1 C31 C32 -4.0(3) . . . . ? 
C28 C27 C31 N1 0.6(3) . . . . ? 
C26 C27 C31 N1 -177.66(17) . . . . ? 
C28 C27 C31 C32 -179.42(17) . . . . ? 
C26 C27 C31 C32 2.3(3) . . . . ? 
C23 C24 C32 C20 3.0(3) . . . . ? 
C25 C24 C32 C20 -174.10(18) . . . . ? 
C23 C24 C32 C31 179.74(18) . . . . ? 
C25 C24 C32 C31 2.7(3) . . . . ? 
C21 C20 C32 C24 -1.2(3) . . . . ? 
C19 C20 C32 C24 178.90(18) . . . . ? 
C21 C20 C32 C31 -177.78(18) . . . . ? 
C19 C20 C32 C31 2.3(3) . . . . ? 
N1 C31 C32 C24 175.51(17) . . . . ? 
C27 C31 C32 C24 -4.4(3) . . . . ? 
N1 C31 C32 C20 -7.9(3) . . . . ? 
C27 C31 C32 C20 172.13(18) . . . . ? 
 
_diffrn_measured_fraction_theta_max    0.998 
_diffrn_reflns_theta_full              27.13 
_diffrn_measured_fraction_theta_full   0.998 
_refine_diff_density_max    0.837 
_refine_diff_density_min   -0.867 
_refine_diff_density_rms    0.072

data_trans2
_publcif_datablock.id '{ad2387a4-fc48-4d60-a1cf-1a988e666ee7}'
_audit_update_record
;
2013-11-04 # Formatted by publCIF

;

# publcif _publ_body_element loop start
loop_
_publ_body_element
_publ_body_title
_publ_body_contents

 section 
;
Introduction
; 
;

;
 section 
;
Experimental
; 
;

;
 subsection 
;
Synthesis and crystallization
; 
;

;
 subsection 
;
Refinement
;
;
Crystal data, data collection and structure refinement details are summarized
in Table 1.
;

 section 
;
Results and discussion
; 
;

;
# publcif _publ_body_element loop end
 
_audit_creation_method            SHELXL-2013
_chemical_name_systematic
?
_chemical_name_common             ?
_chemical_melting_point           ?
_chemical_formula_moiety          'C41 H47 Cl2 N3 Ru, C1 H2 Cl2' 
_chemical_formula_sum
 'C42 H49 Cl4 N3 Ru' 
_chemical_formula_weight          838.71

loop_
 _atom_type_symbol
 _atom_type_description
 _atom_type_scat_dispersion_real
 _atom_type_scat_dispersion_imag
 _atom_type_scat_source
 'C'  'C'   0.0033   0.0016
 'International Tables Vol C Tables 4.2.6.8 and 6.1.1.4'
 'H'  'H'   0.0000   0.0000
 'International Tables Vol C Tables 4.2.6.8 and 6.1.1.4'
 'N'  'N'   0.0061   0.0033
 'International Tables Vol C Tables 4.2.6.8 and 6.1.1.4'
 'Cl'  'Cl'   0.1484   0.1585
 'International Tables Vol C Tables 4.2.6.8 and 6.1.1.4'
 'Ru'  'Ru'  -1.2594   0.8363
 'International Tables Vol C Tables 4.2.6.8 and 6.1.1.4'
 
_space_group_crystal_system       monoclinic
_space_group_IT_number            14
_space_group_name_H-M_alt         'P 21/n'
_space_group_name_Hall            '-P 2yn'
 
_shelx_space_group_comment
;
The symmetry employed for this shelxl refinement is uniquely defined
by the following loop, which should always be used as a source of
symmetry information in preference to the above space-group names.
They are only intended as comments.
;
 
loop_
 _space_group_symop_operation_xyz
 'x, y, z'
 '-x+1/2, y+1/2, -z+1/2'
 '-x, -y, -z'
 'x-1/2, -y-1/2, z-1/2'
 
_cell_length_a                    10.5939(19)
_cell_length_b                    28.939(6)
_cell_length_c                    12.949(3)
_cell_angle_alpha                 90
_cell_angle_beta                  93.682(9)
_cell_angle_gamma                 90
_cell_volume                      3961.7(14)
_cell_formula_units_Z             4
_cell_measurement_temperature     100(2)
_cell_measurement_reflns_used      9095
_cell_measurement_theta_min        2.38
_cell_measurement_theta_max       27.15
_exptl_crystal_description       'block'
_exptl_crystal_colour            'green'

_exptl_crystal_density_method     'not measured'               
_exptl_crystal_density_diffrn     1.406          
_exptl_crystal_F_000              1736
_exptl_transmission_factor_min    ?                                             
_exptl_transmission_factor_max    ?                                             
_exptl_crystal_size_max           0.250
_exptl_crystal_size_mid           0.200
_exptl_crystal_size_min           0.190
_exptl_absorpt_coefficient_mu     0.699
_shelx_estimated_absorpt_T_min    0.845
_shelx_estimated_absorpt_T_max    0.879
_exptl_absorpt_correction_type    multi-scan 
_exptl_absorpt_correction_T_min   0.702 
_exptl_absorpt_correction_T_max   0.741 
_exptl_absorpt_process_details    SADABS 
 
_exptl_special_details
?
 
_diffrn_ambient_temperature       100(2)
_diffrn_radiation_wavelength      0.71073
_diffrn_radiation_type           MoK\a
_diffrn_radiation_source         'sealed tube'
_diffrn_radiation_monochromator  'graphite'
_diffrn_measurement_device_type  'Bruker APEX-II CCD'
_diffrn_measurement_method       '\f and \w scans'
_diffrn_detector_area_resol_mean  ? 
_diffrn_reflns_number             63785
_diffrn_reflns_av_unetI/netI      0.0329
_diffrn_reflns_av_R_equivalents   0.0528
_diffrn_reflns_limit_h_min        -13
_diffrn_reflns_limit_h_max        12
_diffrn_reflns_limit_k_min        -36
_diffrn_reflns_limit_k_max        36
_diffrn_reflns_limit_l_min        -16
_diffrn_reflns_limit_l_max        16
_diffrn_reflns_theta_min          2.113
_diffrn_reflns_theta_max          26.372
_diffrn_reflns_theta_full         25.242
_diffrn_measured_fraction_theta_max   0.996
_diffrn_measured_fraction_theta_full  0.998
_diffrn_reflns_Laue_measured_fraction_max    0.996
_diffrn_reflns_Laue_measured_fraction_full   0.998
_diffrn_reflns_point_group_measured_fraction_max   0.996
_diffrn_reflns_point_group_measured_fraction_full  0.998
_reflns_number_total              8083
_reflns_number_gt                 6749
_reflns_threshold_expression      'I > 2\s(I)'
_reflns_Friedel_coverage          0.000
_reflns_Friedel_fraction_max      .
_reflns_Friedel_fraction_full     .
 
_reflns_special_details
;
 Reflections were merged by SHELXL according to the crystal
 class for the calculation of statistics and refinement.
 
 _reflns_Friedel_fraction is defined as the number of unique
 Friedel pairs measured divided by the number that would be
 possible theoretically, ignoring centric projections and
 systematic absences.
;
 
_computing_data_collection       'Bruker APEX2'
_computing_cell_refinement       'Bruker SAINT'
_computing_data_reduction        'Bruker SAINT'
_computing_structure_solution    'SHELXS-97 (Sheldrick 2008)'
_computing_structure_refinement  'SHELXL-2013 (Sheldrick 2013)'
_computing_molecular_graphics    'Bruker SHELXTL'
_computing_publication_material  'Bruker SHELXTL'
 
_refine_special_details
?
_refine_ls_structure_factor_coef  Fsqd
_refine_ls_matrix_type            full
_refine_ls_weighting_scheme       calc
_refine_ls_weighting_details
'w=1/[\s^2^(Fo^2^)+(0.0451P)^2^+3.0156P] where P=(Fo^2^+2Fc^2^)/3'
_atom_sites_solution_primary      ?
_atom_sites_solution_secondary    ?
_atom_sites_solution_hydrogens    geom
_refine_ls_hydrogen_treatment     constr
_refine_ls_extinction_method      none
_refine_ls_extinction_coef        .
_refine_ls_number_reflns          8083
_refine_ls_number_parameters      459
_refine_ls_number_restraints      140
_refine_ls_R_factor_all           0.0437
_refine_ls_R_factor_gt            0.0321
_refine_ls_wR_factor_ref          0.0839
_refine_ls_wR_factor_gt           0.0781
_refine_ls_goodness_of_fit_ref    1.024
_refine_ls_restrained_S_all       1.015
_refine_ls_shift/su_max           0.001
_refine_ls_shift/su_mean          0.000
 
loop_
 _atom_site_label
 _atom_site_type_symbol
 _atom_site_fract_x
 _atom_site_fract_y
 _atom_site_fract_z
 _atom_site_U_iso_or_equiv
 _atom_site_adp_type
 _atom_site_occupancy
 _atom_site_site_symmetry_order  
 _atom_site_calc_flag
 _atom_site_refinement_flags_posn
 _atom_site_refinement_flags_adp
 _atom_site_refinement_flags_occupancy
 _atom_site_disorder_assembly
 _atom_site_disorder_group
Ru1 Ru 0.67395(2) 0.37674(2) 0.88968(2) 0.00884(6) Uani 1 1 d . U . . .
C1 C 0.7731(2) 0.34769(8) 0.77644(17) 0.0090(4) Uani 1 1 d . U . . .
C2 C 0.8577(2) 0.28296(8) 0.69297(17) 0.0148(5) Uani 1 1 d . U . . .
H2A H 0.7962 0.2581 0.6747 0.018 Uiso 1 1 calc R U . . .
H2B H 0.9444 0.2700 0.6965 0.018 Uiso 1 1 calc R U . . .
C3 C 0.8443(2) 0.32299(9) 0.61654(18) 0.0182(5) Uani 1 1 d . U . . .
H3A H 0.9281 0.3349 0.5994 0.022 Uiso 1 1 calc R U . . .
H3B H 0.7960 0.3137 0.5519 0.022 Uiso 1 1 calc R U . . .
C4 C 0.7495(2) 0.40169(8) 0.62620(17) 0.0118(5) Uani 1 1 d . U . . .
C5 C 0.6360(2) 0.40796(8) 0.56602(17) 0.0126(5) Uani 1 1 d . U . . .
C6 C 0.6172(2) 0.44990(9) 0.51431(18) 0.0170(5) Uani 1 1 d . U . . .
H6 H 0.5409 0.4549 0.4732 0.020 Uiso 1 1 calc R U . . .
C7 C 0.7084(3) 0.48456(9) 0.5220(2) 0.0198(6) Uani 1 1 d . U . . .
H7 H 0.6944 0.5128 0.4857 0.024 Uiso 1 1 calc R U . . .
C8 C 0.8197(2) 0.47783(9) 0.58252(19) 0.0170(5) Uani 1 1 d . U . . .
H8 H 0.8810 0.5018 0.5879 0.020 Uiso 1 1 calc R U . . .
C9 C 0.8435(2) 0.43639(9) 0.63567(17) 0.0133(5) Uani 1 1 d . U . . .
C10 C 0.5368(2) 0.36990(9) 0.55389(18) 0.0143(5) Uani 1 1 d . U . . .
H10 H 0.5622 0.3444 0.6030 0.017 Uiso 1 1 calc R U . . .
C11 C 0.4053(2) 0.38716(9) 0.5797(2) 0.0199(6) Uani 1 1 d . U . . .
H11A H 0.4113 0.4025 0.6472 0.030 Uiso 1 1 calc R U . . .
H11B H 0.3472 0.3609 0.5817 0.030 Uiso 1 1 calc R U . . .
H11C H 0.3735 0.4091 0.5265 0.030 Uiso 1 1 calc R U . . .
C12 C 0.5329(3) 0.35056(10) 0.44341(19) 0.0215(6) Uani 1 1 d . U . . .
H12A H 0.5067 0.3750 0.3942 0.032 Uiso 1 1 calc R U . . .
H12B H 0.4724 0.3249 0.4370 0.032 Uiso 1 1 calc R U . . .
H12C H 0.6172 0.3394 0.4285 0.032 Uiso 1 1 calc R U . . .
C13 C 0.9656(2) 0.43065(9) 0.70232(18) 0.0157(5) Uani 1 1 d . U . . .
H13 H 0.9630 0.3998 0.7370 0.019 Uiso 1 1 calc R U . . .
C14 C 0.9786(3) 0.46767(10) 0.7872(2) 0.0244(6) Uani 1 1 d . U . . .
H14A H 0.9866 0.4982 0.7553 0.037 Uiso 1 1 calc R U . . .
H14B H 1.0540 0.4613 0.8328 0.037 Uiso 1 1 calc R U . . .
H14C H 0.9035 0.4672 0.8276 0.037 Uiso 1 1 calc R U . . .
C15 C 1.0818(3) 0.43152(11) 0.6375(2) 0.0302(7) Uani 1 1 d . U . . .
H15A H 1.0725 0.4079 0.5832 0.045 Uiso 1 1 calc R U . . .
H15B H 1.1580 0.4251 0.6822 0.045 Uiso 1 1 calc R U . . .
H15C H 1.0892 0.4621 0.6057 0.045 Uiso 1 1 calc R U . . .
C16 C 0.8731(2) 0.28663(8) 0.88998(17) 0.0110(5) Uani 1 1 d . U . . .
C17 C 0.9990(2) 0.29555(8) 0.92591(19) 0.0151(5) Uani 1 1 d . U . . .
C18 C 1.0384(3) 0.27916(9) 1.0245(2) 0.0219(6) Uani 1 1 d . U . . .
H18 H 1.1227 0.2849 1.0510 0.026 Uiso 1 1 calc R U . . .
C19 C 0.9577(3) 0.25492(9) 1.0841(2) 0.0245(6) Uani 1 1 d . U . . .
H19 H 0.9851 0.2455 1.1521 0.029 Uiso 1 1 calc R U . . .
C20 C 0.8366(3) 0.24439(9) 1.04456(19) 0.0211(6) Uani 1 1 d . U . . .
H20 H 0.7824 0.2270 1.0854 0.025 Uiso 1 1 calc R U . . .
C21 C 0.7926(2) 0.25886(8) 0.94588(18) 0.0135(5) Uani 1 1 d . U . . .
C22 C 0.6678(2) 0.24082(9) 0.89768(19) 0.0172(5) Uani 1 1 d . U . . .
H22 H 0.6385 0.2625 0.8411 0.021 Uiso 1 1 calc R U . . .
C23 C 0.5635(3) 0.23780(11) 0.9741(2) 0.0290(7) Uani 1 1 d . U . . .
H23A H 0.5868 0.2147 1.0273 0.044 Uiso 1 1 calc R U . . .
H23B H 0.4838 0.2288 0.9371 0.044 Uiso 1 1 calc R U . . .
H23C H 0.5533 0.2680 1.0070 0.044 Uiso 1 1 calc R U . . .
C24 C 0.6897(3) 0.19318(9) 0.8484(2) 0.0252(6) Uani 1 1 d . U . . .
H24A H 0.7578 0.1955 0.8009 0.038 Uiso 1 1 calc R U . . .
H24B H 0.6118 0.1830 0.8101 0.038 Uiso 1 1 calc R U . . .
H24C H 0.7134 0.1707 0.9029 0.038 Uiso 1 1 calc R U . . .
C25 C 1.0933(2) 0.31941(9) 0.8605(2) 0.0195(6) Uani 1 1 d . U . . .
H25 H 1.0451 0.3331 0.7990 0.023 Uiso 1 1 calc R U . . .
C26 C 1.1864(3) 0.28377(10) 0.8208(2) 0.0280(7) Uani 1 1 d . U . . .
H26A H 1.2366 0.2703 0.8795 0.042 Uiso 1 1 calc R U . . .
H26B H 1.2428 0.2990 0.7743 0.042 Uiso 1 1 calc R U . . .
H26C H 1.1390 0.2592 0.7832 0.042 Uiso 1 1 calc R U . . .
C27 C 1.1656(3) 0.35862(10) 0.9175(3) 0.0300(7) Uani 1 1 d . U . . .
H27A H 1.1053 0.3804 0.9448 0.045 Uiso 1 1 calc R U . . .
H27B H 1.2182 0.3747 0.8694 0.045 Uiso 1 1 calc R U . . .
H27C H 1.2196 0.3458 0.9748 0.045 Uiso 1 1 calc R U . . .
C28 C 0.6320(2) 0.43259(8) 0.83138(17) 0.0112(5) Uani 1 1 d . U . . .
H28 H 0.6910 0.4455 0.7872 0.013 Uiso 1 1 calc R U . . .
C29 C 0.5185(2) 0.45944(8) 0.84519(17) 0.0116(5) Uani 1 1 d . U . . .
C30 C 0.4895(2) 0.49309(8) 0.76955(18) 0.0142(5) Uani 1 1 d . U . . .
H30 H 0.5462 0.4977 0.7166 0.017 Uiso 1 1 calc R U . . .
C31 C 0.3803(2) 0.51998(8) 0.76939(19) 0.0168(5) Uani 1 1 d . U . . .
H31 H 0.3616 0.5417 0.7155 0.020 Uiso 1 1 calc R U . . .
C32 C 0.2997(2) 0.51484(8) 0.84789(19) 0.0152(5) Uani 1 1 d . U . . .
H32 H 0.2259 0.5335 0.8485 0.018 Uiso 1 1 calc R U . . .
C33 C 0.3252(2) 0.48224(8) 0.92750(18) 0.0122(5) Uani 1 1 d . U . . .
C34 C 0.2411(2) 0.47906(9) 1.00950(19) 0.0160(5) Uani 1 1 d . U . . .
H34 H 0.1693 0.4987 1.0088 0.019 Uiso 1 1 calc R U . . .
C35 C 0.2621(2) 0.44870(9) 1.08748(18) 0.0155(5) Uani 1 1 d . U . . .
H35 H 0.2050 0.4472 1.1411 0.019 Uiso 1 1 calc R U . . .
C36 C 0.3699(2) 0.41867(8) 1.09022(18) 0.0138(5) Uani 1 1 d . U . . .
C37 C 0.4557(2) 0.42068(8) 1.01021(17) 0.0108(5) Uani 1 1 d . U . . .
C38 C 0.4338(2) 0.45343(8) 0.92653(17) 0.0109(5) Uani 1 1 d . U . . .
C39 C 0.3928(2) 0.38689(9) 1.17095(18) 0.0165(5) Uani 1 1 d . U . . .
H39 H 0.3360 0.3847 1.2246 0.020 Uiso 1 1 calc R U . . .
C40 C 0.4976(2) 0.35890(9) 1.17232(18) 0.0174(5) Uani 1 1 d . U . . .
H40 H 0.5148 0.3375 1.2270 0.021 Uiso 1 1 calc R U . . .
C41 C 0.5780(2) 0.36261(8) 1.09173(18) 0.0144(5) Uani 1 1 d . U . . .
H41 H 0.6506 0.3433 1.0930 0.017 Uiso 1 1 calc R U . . .
C42 C 0.8816(4) 0.37750(11) 0.2563(2) 0.0392(8) Uani 1 1 d . U . . .
H42A H 0.9596 0.3743 0.2187 0.047 Uiso 1 1 calc R U . . .
H42B H 0.8188 0.3947 0.2113 0.047 Uiso 1 1 calc R U . . .
Cl1 Cl 0.49662(5) 0.33593(2) 0.82003(4) 0.01387(13) Uani 1 1 d . U . . .
Cl2 Cl 0.85476(5) 0.39529(2) 0.99707(4) 0.01511(13) Uani 1 1 d . U . . .
Cl3 Cl 0.91583(11) 0.40883(3) 0.36997(7) 0.0546(3) Uani 1 1 d . U . . .
Cl4 Cl 0.82144(7) 0.32213(3) 0.28229(6) 0.02966(17) Uani 1 1 d . U . . .
N1 N 0.77442(18) 0.35756(7) 0.67415(14) 0.0114(4) Uani 1 1 d . U . . .
N2 N 0.82999(18) 0.30574(7) 0.79084(14) 0.0098(4) Uani 1 1 d . U . . .
N3 N 0.55839(19) 0.39197(7) 1.01264(14) 0.0119(4) Uani 1 1 d . U . . .
 
loop_
 _atom_site_aniso_label
 _atom_site_aniso_U_11
 _atom_site_aniso_U_22
 _atom_site_aniso_U_33
 _atom_site_aniso_U_23
 _atom_site_aniso_U_13
 _atom_site_aniso_U_12
Ru1 0.00840(10) 0.01012(10) 0.00811(10) -0.00055(7) 0.00128(7) 0.00065(7)
C1 0.0028(10) 0.0117(11) 0.0124(11) 0.0006(9) -0.0001(9) -0.0033(9)
C2 0.0175(13) 0.0157(12) 0.0114(11) -0.0032(9) 0.0022(10) 0.0036(10)
C3 0.0224(14) 0.0197(13) 0.0129(12) -0.0011(10) 0.0052(10) 0.0082(11)
C4 0.0135(12) 0.0150(12) 0.0075(10) 0.0007(9) 0.0058(9) 0.0012(9)
C5 0.0143(12) 0.0159(12) 0.0079(10) 0.0000(9) 0.0037(9) 0.0019(10)
C6 0.0155(13) 0.0205(13) 0.0151(12) 0.0047(10) 0.0012(10) 0.0035(10)
C7 0.0233(14) 0.0176(13) 0.0192(13) 0.0080(10) 0.0067(11) 0.0041(11)
C8 0.0156(13) 0.0183(13) 0.0176(12) 0.0018(10) 0.0061(10) -0.0028(10)
C9 0.0135(12) 0.0182(13) 0.0086(11) -0.0010(9) 0.0039(9) 0.0011(10)
C10 0.0132(12) 0.0182(13) 0.0114(11) 0.0018(9) -0.0004(9) 0.0020(10)
C11 0.0147(13) 0.0218(14) 0.0231(13) -0.0005(11) -0.0003(11) 0.0009(11)
C12 0.0243(14) 0.0260(15) 0.0142(12) -0.0035(10) 0.0006(11) -0.0030(12)
C13 0.0118(12) 0.0190(13) 0.0164(12) 0.0022(10) 0.0009(10) -0.0009(10)
C14 0.0225(15) 0.0280(15) 0.0224(14) -0.0033(11) -0.0009(11) -0.0063(12)
C15 0.0179(14) 0.0454(19) 0.0277(15) -0.0012(13) 0.0040(12) 0.0018(13)
C16 0.0123(12) 0.0094(11) 0.0111(11) -0.0014(9) -0.0005(9) 0.0018(9)
C17 0.0162(12) 0.0085(12) 0.0203(12) -0.0041(9) -0.0007(10) 0.0028(10)
C18 0.0191(14) 0.0187(14) 0.0262(14) -0.0046(11) -0.0109(11) 0.0053(11)
C19 0.0375(16) 0.0210(14) 0.0136(12) 0.0019(10) -0.0083(12) 0.0086(12)
C20 0.0316(15) 0.0167(13) 0.0158(12) 0.0041(10) 0.0069(11) 0.0045(11)
C21 0.0168(12) 0.0097(11) 0.0142(11) -0.0008(9) 0.0027(10) 0.0022(10)
C22 0.0181(13) 0.0121(12) 0.0217(13) 0.0017(10) 0.0038(10) -0.0003(10)
C23 0.0234(15) 0.0315(17) 0.0335(16) 0.0042(13) 0.0115(13) -0.0052(13)
C24 0.0218(15) 0.0186(14) 0.0349(16) -0.0080(12) -0.0007(12) -0.0034(11)
C25 0.0087(12) 0.0175(13) 0.0319(15) -0.0036(11) -0.0015(11) -0.0013(10)
C26 0.0162(14) 0.0294(16) 0.0383(17) -0.0128(13) 0.0007(12) 0.0004(12)
C27 0.0171(14) 0.0240(15) 0.0491(18) -0.0116(14) 0.0034(13) -0.0056(12)
C28 0.0118(12) 0.0141(12) 0.0078(10) -0.0007(9) 0.0017(9) -0.0015(9)
C29 0.0125(12) 0.0099(11) 0.0123(11) -0.0037(9) -0.0005(9) -0.0023(9)
C30 0.0147(12) 0.0146(12) 0.0136(11) -0.0012(9) 0.0028(10) -0.0018(10)
C31 0.0196(13) 0.0124(12) 0.0176(12) 0.0003(10) -0.0038(10) 0.0009(10)
C32 0.0132(12) 0.0130(12) 0.0190(12) -0.0027(10) -0.0027(10) 0.0022(10)
C33 0.0094(11) 0.0121(12) 0.0149(11) -0.0060(9) -0.0016(9) -0.0027(9)
C34 0.0108(12) 0.0166(13) 0.0205(13) -0.0063(10) 0.0006(10) 0.0016(10)
C35 0.0133(12) 0.0189(13) 0.0146(11) -0.0062(10) 0.0048(10) -0.0029(10)
C36 0.0145(12) 0.0154(12) 0.0117(11) -0.0045(9) 0.0017(9) -0.0038(10)
C37 0.0106(11) 0.0122(12) 0.0095(10) -0.0040(9) -0.0011(9) -0.0027(9)
C38 0.0101(11) 0.0108(11) 0.0115(11) -0.0042(9) 0.0001(9) -0.0026(9)
C39 0.0176(13) 0.0214(13) 0.0114(11) -0.0027(9) 0.0067(10) -0.0034(10)
C40 0.0218(14) 0.0192(13) 0.0112(11) 0.0032(10) 0.0010(10) -0.0003(11)
C41 0.0160(13) 0.0152(12) 0.0119(11) -0.0014(9) 0.0004(10) 0.0034(10)
C42 0.062(2) 0.0283(17) 0.0254(16) 0.0051(13) -0.0076(15) -0.0025(16)
Cl1 0.0100(3) 0.0169(3) 0.0149(3) -0.0027(2) 0.0014(2) -0.0021(2)
Cl2 0.0126(3) 0.0181(3) 0.0142(3) -0.0038(2) -0.0017(2) 0.0014(2)
Cl3 0.0879(8) 0.0403(5) 0.0345(4) -0.0096(4) -0.0052(5) -0.0132(5)
Cl4 0.0287(4) 0.0274(4) 0.0325(4) 0.0023(3) -0.0006(3) 0.0030(3)
N1 0.0129(10) 0.0127(10) 0.0087(9) -0.0003(8) 0.0023(8) 0.0028(8)
N2 0.0091(10) 0.0105(10) 0.0099(9) -0.0006(7) 0.0012(8) 0.0019(8)
N3 0.0126(10) 0.0133(10) 0.0098(9) -0.0026(8) -0.0001(8) -0.0013(8)
 
_geom_special_details
;
 All esds (except the esd in the dihedral angle between two l.s. planes)
 are estimated using the full covariance matrix.  The cell esds are taken
 into account individually in the estimation of esds in distances, angles
 and torsion angles; correlations between esds in cell parameters are only
 used when they are defined by crystal symmetry.  An approximate (isotropic)
 treatment of cell esds is used for estimating esds involving l.s. planes.
;
 
loop_
 _geom_bond_atom_site_label_1
 _geom_bond_atom_site_label_2
 _geom_bond_distance
 _geom_bond_site_symmetry_2
 _geom_bond_publ_flag
Ru1 C28 1.827(2) . ?
Ru1 C1 2.039(2) . ?
Ru1 N3 2.116(2) . ?
Ru1 Cl1 2.3493(7) . ?
Ru1 Cl2 2.3556(7) . ?
C1 N1 1.356(3) . ?
C1 N2 1.363(3) . ?
C2 N2 1.475(3) . ?
C2 C3 1.524(3) . ?
C2 H2A 0.9900 . ?
C2 H2B 0.9900 . ?
C3 N1 1.475(3) . ?
C3 H3A 0.9900 . ?
C3 H3B 0.9900 . ?
C4 C5 1.402(3) . ?
C4 C9 1.414(3) . ?
C4 N1 1.437(3) . ?
C5 C6 1.394(3) . ?
C5 C10 1.523(3) . ?
C6 C7 1.392(4) . ?
C6 H6 0.9500 . ?
C7 C8 1.387(4) . ?
C7 H7 0.9500 . ?
C8 C9 1.398(3) . ?
C8 H8 0.9500 . ?
C9 C13 1.518(3) . ?
C10 C12 1.534(3) . ?
C10 C11 1.537(3) . ?
C10 H10 1.0000 . ?
C11 H11A 0.9800 . ?
C11 H11B 0.9800 . ?
C11 H11C 0.9800 . ?
C12 H12A 0.9800 . ?
C12 H12B 0.9800 . ?
C12 H12C 0.9800 . ?
C13 C15 1.535(4) . ?
C13 C14 1.534(4) . ?
C13 H13 1.0000 . ?
C14 H14A 0.9800 . ?
C14 H14B 0.9800 . ?
C14 H14C 0.9800 . ?
C15 H15A 0.9800 . ?
C15 H15B 0.9800 . ?
C15 H15C 0.9800 . ?
C16 C21 1.406(3) . ?
C16 C17 1.408(3) . ?
C16 N2 1.445(3) . ?
C17 C18 1.400(4) . ?
C17 C25 1.517(4) . ?
C18 C19 1.380(4) . ?
C18 H18 0.9500 . ?
C19 C20 1.384(4) . ?
C19 H19 0.9500 . ?
C20 C21 1.396(3) . ?
C20 H20 0.9500 . ?
C21 C22 1.517(3) . ?
C22 C23 1.533(4) . ?
C22 C24 1.543(4) . ?
C22 H22 1.0000 . ?
C23 H23A 0.9800 . ?
C23 H23B 0.9800 . ?
C23 H23C 0.9800 . ?
C24 H24A 0.9800 . ?
C24 H24B 0.9800 . ?
C24 H24C 0.9800 . ?
C25 C27 1.532(4) . ?
C25 C26 1.538(4) . ?
C25 H25 1.0000 . ?
C26 H26A 0.9800 . ?
C26 H26B 0.9800 . ?
C26 H26C 0.9800 . ?
C27 H27A 0.9800 . ?
C27 H27B 0.9800 . ?
C27 H27C 0.9800 . ?
C28 C29 1.453(3) . ?
C28 H28 0.9500 . ?
C29 C30 1.401(3) . ?
C29 C38 1.437(3) . ?
C30 C31 1.394(3) . ?
C30 H30 0.9500 . ?
C31 C32 1.377(4) . ?
C31 H31 0.9500 . ?
C32 C33 1.411(3) . ?
C32 H32 0.9500 . ?
C33 C38 1.422(3) . ?
C33 C34 1.432(3) . ?
C34 C35 1.346(4) . ?
C34 H34 0.9500 . ?
C35 C36 1.434(3) . ?
C35 H35 0.9500 . ?
C36 C39 1.402(3) . ?
C36 C37 1.423(3) . ?
C37 N3 1.367(3) . ?
C37 C38 1.447(3) . ?
C39 C40 1.373(4) . ?
C39 H39 0.9500 . ?
C40 C41 1.393(3) . ?
C40 H40 0.9500 . ?
C41 N3 1.337(3) . ?
C41 H41 0.9500 . ?
C42 Cl3 1.746(3) . ?
C42 Cl4 1.765(3) . ?
C42 H42A 0.9900 . ?
C42 H42B 0.9900 . ?
 
loop_
 _geom_angle_atom_site_label_1
 _geom_angle_atom_site_label_2
 _geom_angle_atom_site_label_3
 _geom_angle
 _geom_angle_site_symmetry_1
 _geom_angle_site_symmetry_3
 _geom_angle_publ_flag
C28 Ru1 C1 100.97(10) . . ?
C28 Ru1 N3 89.41(9) . . ?
C1 Ru1 N3 167.57(8) . . ?
C28 Ru1 Cl1 96.84(7) . . ?
C1 Ru1 Cl1 87.31(6) . . ?
N3 Ru1 Cl1 84.64(6) . . ?
C28 Ru1 Cl2 102.07(7) . . ?
C1 Ru1 Cl2 94.67(6) . . ?
N3 Ru1 Cl2 89.78(6) . . ?
Cl1 Ru1 Cl2 160.23(2) . . ?
N1 C1 N2 106.81(19) . . ?
N1 C1 Ru1 130.81(17) . . ?
N2 C1 Ru1 120.82(16) . . ?
N2 C2 C3 101.70(18) . . ?
N2 C2 H2A 111.4 . . ?
C3 C2 H2A 111.4 . . ?
N2 C2 H2B 111.4 . . ?
C3 C2 H2B 111.4 . . ?
H2A C2 H2B 109.3 . . ?
N1 C3 C2 102.46(18) . . ?
N1 C3 H3A 111.3 . . ?
C2 C3 H3A 111.3 . . ?
N1 C3 H3B 111.3 . . ?
C2 C3 H3B 111.3 . . ?
H3A C3 H3B 109.2 . . ?
C5 C4 C9 122.0(2) . . ?
C5 C4 N1 118.9(2) . . ?
C9 C4 N1 119.0(2) . . ?
C6 C5 C4 118.1(2) . . ?
C6 C5 C10 120.2(2) . . ?
C4 C5 C10 121.7(2) . . ?
C5 C6 C7 121.1(2) . . ?
C5 C6 H6 119.5 . . ?
C7 C6 H6 119.5 . . ?
C8 C7 C6 120.0(2) . . ?
C8 C7 H7 120.0 . . ?
C6 C7 H7 120.0 . . ?
C7 C8 C9 121.2(2) . . ?
C7 C8 H8 119.4 . . ?
C9 C8 H8 119.4 . . ?
C8 C9 C4 117.6(2) . . ?
C8 C9 C13 119.6(2) . . ?
C4 C9 C13 122.8(2) . . ?
C5 C10 C12 109.7(2) . . ?
C5 C10 C11 111.8(2) . . ?
C12 C10 C11 110.5(2) . . ?
C5 C10 H10 108.2 . . ?
C12 C10 H10 108.2 . . ?
C11 C10 H10 108.2 . . ?
C10 C11 H11A 109.5 . . ?
C10 C11 H11B 109.5 . . ?
H11A C11 H11B 109.5 . . ?
C10 C11 H11C 109.5 . . ?
H11A C11 H11C 109.5 . . ?
H11B C11 H11C 109.5 . . ?
C10 C12 H12A 109.5 . . ?
C10 C12 H12B 109.5 . . ?
H12A C12 H12B 109.5 . . ?
C10 C12 H12C 109.5 . . ?
H12A C12 H12C 109.5 . . ?
H12B C12 H12C 109.5 . . ?
C9 C13 C15 111.8(2) . . ?
C9 C13 C14 111.4(2) . . ?
C15 C13 C14 110.0(2) . . ?
C9 C13 H13 107.8 . . ?
C15 C13 H13 107.8 . . ?
C14 C13 H13 107.8 . . ?
C13 C14 H14A 109.5 . . ?
C13 C14 H14B 109.5 . . ?
H14A C14 H14B 109.5 . . ?
C13 C14 H14C 109.5 . . ?
H14A C14 H14C 109.5 . . ?
H14B C14 H14C 109.5 . . ?
C13 C15 H15A 109.5 . . ?
C13 C15 H15B 109.5 . . ?
H15A C15 H15B 109.5 . . ?
C13 C15 H15C 109.5 . . ?
H15A C15 H15C 109.5 . . ?
H15B C15 H15C 109.5 . . ?
C21 C16 C17 121.9(2) . . ?
C21 C16 N2 120.5(2) . . ?
C17 C16 N2 117.5(2) . . ?
C18 C17 C16 117.4(2) . . ?
C18 C17 C25 119.6(2) . . ?
C16 C17 C25 122.9(2) . . ?
C19 C18 C17 121.5(2) . . ?
C19 C18 H18 119.3 . . ?
C17 C18 H18 119.3 . . ?
C18 C19 C20 119.9(2) . . ?
C18 C19 H19 120.1 . . ?
C20 C19 H19 120.1 . . ?
C19 C20 C21 121.3(2) . . ?
C19 C20 H20 119.3 . . ?
C21 C20 H20 119.3 . . ?
C20 C21 C16 117.6(2) . . ?
C20 C21 C22 120.3(2) . . ?
C16 C21 C22 121.8(2) . . ?
C21 C22 C23 113.5(2) . . ?
C21 C22 C24 109.1(2) . . ?
C23 C22 C24 110.5(2) . . ?
C21 C22 H22 107.8 . . ?
C23 C22 H22 107.8 . . ?
C24 C22 H22 107.8 . . ?
C22 C23 H23A 109.5 . . ?
C22 C23 H23B 109.5 . . ?
H23A C23 H23B 109.5 . . ?
C22 C23 H23C 109.5 . . ?
H23A C23 H23C 109.5 . . ?
H23B C23 H23C 109.5 . . ?
C22 C24 H24A 109.5 . . ?
C22 C24 H24B 109.5 . . ?
H24A C24 H24B 109.5 . . ?
C22 C24 H24C 109.5 . . ?
H24A C24 H24C 109.5 . . ?
H24B C24 H24C 109.5 . . ?
C17 C25 C27 113.3(2) . . ?
C17 C25 C26 109.9(2) . . ?
C27 C25 C26 110.3(2) . . ?
C17 C25 H25 107.7 . . ?
C27 C25 H25 107.7 . . ?
C26 C25 H25 107.7 . . ?
C25 C26 H26A 109.5 . . ?
C25 C26 H26B 109.5 . . ?
H26A C26 H26B 109.5 . . ?
C25 C26 H26C 109.5 . . ?
H26A C26 H26C 109.5 . . ?
H26B C26 H26C 109.5 . . ?
C25 C27 H27A 109.5 . . ?
C25 C27 H27B 109.5 . . ?
H27A C27 H27B 109.5 . . ?
C25 C27 H27C 109.5 . . ?
H27A C27 H27C 109.5 . . ?
H27B C27 H27C 109.5 . . ?
C29 C28 Ru1 127.12(17) . . ?
C29 C28 H28 116.4 . . ?
Ru1 C28 H28 116.4 . . ?
C30 C29 C38 118.5(2) . . ?
C30 C29 C28 115.6(2) . . ?
C38 C29 C28 125.9(2) . . ?
C31 C30 C29 122.3(2) . . ?
C31 C30 H30 118.9 . . ?
C29 C30 H30 118.9 . . ?
C32 C31 C30 119.5(2) . . ?
C32 C31 H31 120.3 . . ?
C30 C31 H31 120.3 . . ?
C31 C32 C33 120.9(2) . . ?
C31 C32 H32 119.6 . . ?
C33 C32 H32 119.6 . . ?
C32 C33 C38 120.2(2) . . ?
C32 C33 C34 119.0(2) . . ?
C38 C33 C34 120.8(2) . . ?
C35 C34 C33 121.2(2) . . ?
C35 C34 H34 119.4 . . ?
C33 C34 H34 119.4 . . ?
C34 C35 C36 120.5(2) . . ?
C34 C35 H35 119.8 . . ?
C36 C35 H35 119.8 . . ?
C39 C36 C37 118.8(2) . . ?
C39 C36 C35 121.0(2) . . ?
C37 C36 C35 120.2(2) . . ?
N3 C37 C36 120.2(2) . . ?
N3 C37 C38 120.3(2) . . ?
C36 C37 C38 119.5(2) . . ?
C33 C38 C29 118.6(2) . . ?
C33 C38 C37 117.9(2) . . ?
C29 C38 C37 123.4(2) . . ?
C40 C39 C36 119.9(2) . . ?
C40 C39 H39 120.1 . . ?
C36 C39 H39 120.1 . . ?
C39 C40 C41 118.5(2) . . ?
C39 C40 H40 120.7 . . ?
C41 C40 H40 120.7 . . ?
N3 C41 C40 123.4(2) . . ?
N3 C41 H41 118.3 . . ?
C40 C41 H41 118.3 . . ?
Cl3 C42 Cl4 111.65(17) . . ?
Cl3 C42 H42A 109.3 . . ?
Cl4 C42 H42A 109.3 . . ?
Cl3 C42 H42B 109.3 . . ?
Cl4 C42 H42B 109.3 . . ?
H42A C42 H42B 108.0 . . ?
C1 N1 C4 126.59(19) . . ?
C1 N1 C3 112.83(19) . . ?
C4 N1 C3 117.93(18) . . ?
C1 N2 C16 125.06(19) . . ?
C1 N2 C2 113.04(18) . . ?
C16 N2 C2 121.55(18) . . ?
C41 N3 C37 119.2(2) . . ?
C41 N3 Ru1 112.03(16) . . ?
C37 N3 Ru1 127.37(15) . . ?
 
loop_
 _geom_torsion_atom_site_label_1
 _geom_torsion_atom_site_label_2
 _geom_torsion_atom_site_label_3
 _geom_torsion_atom_site_label_4
 _geom_torsion
 _geom_torsion_site_symmetry_1
 _geom_torsion_site_symmetry_2
 _geom_torsion_site_symmetry_3
 _geom_torsion_site_symmetry_4
 _geom_torsion_publ_flag
N2 C2 C3 N1 -16.7(2) . . . . ?
C9 C4 C5 C6 0.2(3) . . . . ?
N1 C4 C5 C6 -175.7(2) . . . . ?
C9 C4 C5 C10 178.3(2) . . . . ?
N1 C4 C5 C10 2.5(3) . . . . ?
C4 C5 C6 C7 0.1(4) . . . . ?
C10 C5 C6 C7 -178.1(2) . . . . ?
C5 C6 C7 C8 -0.6(4) . . . . ?
C6 C7 C8 C9 0.8(4) . . . . ?
C7 C8 C9 C4 -0.5(3) . . . . ?
C7 C8 C9 C13 -179.1(2) . . . . ?
C5 C4 C9 C8 0.0(3) . . . . ?
N1 C4 C9 C8 175.9(2) . . . . ?
C5 C4 C9 C13 178.6(2) . . . . ?
N1 C4 C9 C13 -5.6(3) . . . . ?
C6 C5 C10 C12 68.8(3) . . . . ?
C4 C5 C10 C12 -109.3(2) . . . . ?
C6 C5 C10 C11 -54.2(3) . . . . ?
C4 C5 C10 C11 127.7(2) . . . . ?
C8 C9 C13 C15 -64.9(3) . . . . ?
C4 C9 C13 C15 116.5(3) . . . . ?
C8 C9 C13 C14 58.6(3) . . . . ?
C4 C9 C13 C14 -120.0(3) . . . . ?
C21 C16 C17 C18 -5.7(3) . . . . ?
N2 C16 C17 C18 176.5(2) . . . . ?
C21 C16 C17 C25 170.9(2) . . . . ?
N2 C16 C17 C25 -6.9(3) . . . . ?
C16 C17 C18 C19 0.4(4) . . . . ?
C25 C17 C18 C19 -176.2(2) . . . . ?
C17 C18 C19 C20 3.2(4) . . . . ?
C18 C19 C20 C21 -1.7(4) . . . . ?
C19 C20 C21 C16 -3.3(4) . . . . ?
C19 C20 C21 C22 170.5(2) . . . . ?
C17 C16 C21 C20 7.0(3) . . . . ?
N2 C16 C21 C20 -175.2(2) . . . . ?
C17 C16 C21 C22 -166.6(2) . . . . ?
N2 C16 C21 C22 11.1(3) . . . . ?
C20 C21 C22 C23 41.1(3) . . . . ?
C16 C21 C22 C23 -145.4(2) . . . . ?
C20 C21 C22 C24 -82.6(3) . . . . ?
C16 C21 C22 C24 90.9(3) . . . . ?
C18 C17 C25 C27 -51.7(3) . . . . ?
C16 C17 C25 C27 131.8(3) . . . . ?
C18 C17 C25 C26 72.1(3) . . . . ?
C16 C17 C25 C26 -104.3(3) . . . . ?
C1 Ru1 C28 C29 147.9(2) . . . . ?
N3 Ru1 C28 C29 -25.2(2) . . . . ?
Cl1 Ru1 C28 C29 59.3(2) . . . . ?
Cl2 Ru1 C28 C29 -114.85(19) . . . . ?
Ru1 C28 C29 C30 -160.96(18) . . . . ?
Ru1 C28 C29 C38 17.2(3) . . . . ?
C38 C29 C30 C31 -1.5(3) . . . . ?
C28 C29 C30 C31 176.7(2) . . . . ?
C29 C30 C31 C32 2.4(4) . . . . ?
C30 C31 C32 C33 -1.0(4) . . . . ?
C31 C32 C33 C38 -1.3(3) . . . . ?
C31 C32 C33 C34 178.0(2) . . . . ?
C32 C33 C34 C35 -179.6(2) . . . . ?
C38 C33 C34 C35 -0.3(3) . . . . ?
C33 C34 C35 C36 0.0(4) . . . . ?
C34 C35 C36 C39 180.0(2) . . . . ?
C34 C35 C36 C37 -0.1(4) . . . . ?
C39 C36 C37 N3 0.1(3) . . . . ?
C35 C36 C37 N3 -179.8(2) . . . . ?
C39 C36 C37 C38 -179.7(2) . . . . ?
C35 C36 C37 C38 0.4(3) . . . . ?
C32 C33 C38 C29 2.2(3) . . . . ?
C34 C33 C38 C29 -177.1(2) . . . . ?
C32 C33 C38 C37 179.8(2) . . . . ?
C34 C33 C38 C37 0.6(3) . . . . ?
C30 C29 C38 C33 -0.8(3) . . . . ?
C28 C29 C38 C33 -178.8(2) . . . . ?
C30 C29 C38 C37 -178.3(2) . . . . ?
C28 C29 C38 C37 3.6(4) . . . . ?
N3 C37 C38 C33 179.6(2) . . . . ?
C36 C37 C38 C33 -0.6(3) . . . . ?
N3 C37 C38 C29 -2.8(3) . . . . ?
C36 C37 C38 C29 176.9(2) . . . . ?
C37 C36 C39 C40 0.8(3) . . . . ?
C35 C36 C39 C40 -179.3(2) . . . . ?
C36 C39 C40 C41 -0.8(4) . . . . ?
C39 C40 C41 N3 -0.2(4) . . . . ?
N2 C1 N1 C4 -166.0(2) . . . . ?
Ru1 C1 N1 C4 28.5(3) . . . . ?
N2 C1 N1 C3 -5.0(3) . . . . ?
Ru1 C1 N1 C3 -170.52(17) . . . . ?
C5 C4 N1 C1 -108.3(3) . . . . ?
C9 C4 N1 C1 75.7(3) . . . . ?
C5 C4 N1 C3 91.6(3) . . . . ?
C9 C4 N1 C3 -84.4(3) . . . . ?
C2 C3 N1 C1 14.4(3) . . . . ?
C2 C3 N1 C4 177.2(2) . . . . ?
N1 C1 N2 C16 165.9(2) . . . . ?
Ru1 C1 N2 C16 -26.8(3) . . . . ?
N1 C1 N2 C2 -7.4(3) . . . . ?
Ru1 C1 N2 C2 159.87(16) . . . . ?
C21 C16 N2 C1 90.8(3) . . . . ?
C17 C16 N2 C1 -91.4(3) . . . . ?
C21 C16 N2 C2 -96.4(3) . . . . ?
C17 C16 N2 C2 81.4(3) . . . . ?
C3 C2 N2 C1 15.8(3) . . . . ?
C3 C2 N2 C16 -157.8(2) . . . . ?
C40 C41 N3 C37 1.1(4) . . . . ?
C40 C41 N3 Ru1 -166.4(2) . . . . ?
C36 C37 N3 C41 -1.0(3) . . . . ?
C38 C37 N3 C41 178.7(2) . . . . ?
C36 C37 N3 Ru1 164.40(16) . . . . ?
C38 C37 N3 Ru1 -15.8(3) . . . . ?
 
_refine_diff_density_max    1.205
_refine_diff_density_min   -1.063
_refine_diff_density_rms    0.076

_shelxl_version_number 2013-3

_shelx_res_file
;
TITL AT235 in P2(1)/n
CELL  0.71073  10.5939  28.9393  12.9491   90.000   93.682   90.000
ZERR    4.00   0.00190   0.00620   0.00260   0.0000   0.0092   0.0000
LATT 1
SYMM 1/2-X, 1/2+Y, 1/2-Z
SFAC C  H  N  Cl Ru
UNIT 168 196 12 16 4
REM Solution 1  R1  0.087  Rweak  0.005,  Alpha= 0.0533  in P2(1)/n
REM Formula:  C42 N3 Cl4 Ru
L.S. 40
SHEL 999 0.8
BOND $H
ACTA
OMIT 0   1   1
OMIT 1   1   0
OMIT -1   6   3
OMIT -2  12   2
HTAB
CONF
FMAP 2
PLAN 20
SIZE 0.190 0.200 0.250
DELU
TEMP -173.150
WGHT    0.045100    3.015600
FVAR       0.19879
RU1   5    0.673949    0.376740    0.889681    11.00000    0.00840    0.01012 =
         0.00811   -0.00055    0.00128    0.00065
C1    1    0.773143    0.347695    0.776438    11.00000    0.00282    0.01174 =
         0.01240    0.00060   -0.00009   -0.00334
C2    1    0.857743    0.282964    0.692973    11.00000    0.01750    0.01573 =
         0.01144   -0.00323    0.00223    0.00360
AFIX  23
H2A   2    0.796153    0.258085    0.674736    11.00000   -1.20000
H2B   2    0.944386    0.269995    0.696491    11.00000   -1.20000
AFIX   0
C3    1    0.844348    0.322995    0.616540    11.00000    0.02242    0.01969 =
         0.01292   -0.00108    0.00521    0.00822
AFIX  23
H3A   2    0.928070    0.334924    0.599439    11.00000   -1.20000
H3B   2    0.795998    0.313662    0.551937    11.00000   -1.20000
AFIX   0
C4    1    0.749462    0.401687    0.626197    11.00000    0.01348    0.01499 =
         0.00750    0.00070    0.00583    0.00118
C5    1    0.635989    0.407956    0.566023    11.00000    0.01432    0.01593 =
         0.00786    0.00000    0.00368    0.00193
C6    1    0.617205    0.449901    0.514314    11.00000    0.01547    0.02048 =
         0.01508    0.00468    0.00121    0.00355
AFIX  43
H6    2    0.540915    0.454899    0.473185    11.00000   -1.20000
AFIX   0
C7    1    0.708393    0.484564    0.521972    11.00000    0.02335    0.01756 =
         0.01921    0.00796    0.00668    0.00414
AFIX  43
H7    2    0.694401    0.512835    0.485742    11.00000   -1.20000
AFIX   0
C8    1    0.819732    0.477833    0.582516    11.00000    0.01560    0.01833 =
         0.01764    0.00185    0.00611   -0.00283
AFIX  43
H8    2    0.880965    0.501839    0.587938    11.00000   -1.20000
AFIX   0
C9    1    0.843461    0.436390    0.635669    11.00000    0.01350    0.01825 =
         0.00865   -0.00098    0.00390    0.00114
C10   1    0.536829    0.369897    0.553887    11.00000    0.01319    0.01820 =
         0.01142    0.00176   -0.00044    0.00205
AFIX  13
H10   2    0.562238    0.344368    0.602953    11.00000   -1.20000
AFIX   0
C11   1    0.405269    0.387164    0.579672    11.00000    0.01468    0.02176 =
         0.02306   -0.00046   -0.00032    0.00086
AFIX 137
H11A  2    0.411308    0.402535    0.647245    11.00000   -1.50000
H11B  2    0.347163    0.360878    0.581716    11.00000   -1.50000
H11C  2    0.373470    0.409087    0.526493    11.00000   -1.50000
AFIX   0
C12   1    0.532934    0.350557    0.443408    11.00000    0.02426    0.02599 =
         0.01420   -0.00350    0.00062   -0.00299
AFIX 137
H12A  2    0.506711    0.374972    0.394155    11.00000   -1.50000
H12B  2    0.472408    0.324949    0.436978    11.00000   -1.50000
H12C  2    0.617195    0.339396    0.428522    11.00000   -1.50000
AFIX   0
C13   1    0.965580    0.430646    0.702323    11.00000    0.01181    0.01903 =
         0.01636    0.00220    0.00091   -0.00085
AFIX  13
H13   2    0.963011    0.399804    0.736952    11.00000   -1.20000
AFIX   0
C14   1    0.978571    0.467673    0.787151    11.00000    0.02253    0.02805 =
         0.02242   -0.00327   -0.00091   -0.00630
AFIX 137
H14A  2    0.986575    0.498158    0.755272    11.00000   -1.50000
H14B  2    1.053964    0.461337    0.832804    11.00000   -1.50000
H14C  2    0.903471    0.467174    0.827556    11.00000   -1.50000
AFIX   0
C15   1    1.081817    0.431525    0.637477    11.00000    0.01791    0.04538 =
         0.02768   -0.00116    0.00404    0.00185
AFIX 137
H15A  2    1.072485    0.407945    0.583203    11.00000   -1.50000
H15B  2    1.158010    0.425137    0.682152    11.00000   -1.50000
H15C  2    1.089186    0.462052    0.605665    11.00000   -1.50000
AFIX   0
C16   1    0.873131    0.286630    0.889982    11.00000    0.01228    0.00937 =
         0.01106   -0.00141   -0.00046    0.00180
C17   1    0.999024    0.295551    0.925913    11.00000    0.01624    0.00851 =
         0.02033   -0.00414   -0.00066    0.00281
C18   1    1.038445    0.279159    1.024520    11.00000    0.01913    0.01867 =
         0.02624   -0.00462   -0.01085    0.00531
AFIX  43
H18   2    1.122716    0.284857    1.051004    11.00000   -1.20000
AFIX   0
C19   1    0.957657    0.254918    1.084087    11.00000    0.03746    0.02105 =
         0.01360    0.00192   -0.00834    0.00858
AFIX  43
H19   2    0.985094    0.245473    1.152125    11.00000   -1.20000
AFIX   0
C20   1    0.836639    0.244391    1.044558    11.00000    0.03156    0.01673 =
         0.01580    0.00408    0.00693    0.00455
AFIX  43
H20   2    0.782435    0.226965    1.085381    11.00000   -1.20000
AFIX   0
C21   1    0.792560    0.258864    0.945876    11.00000    0.01677    0.00969 =
         0.01419   -0.00076    0.00269    0.00217
C22   1    0.667841    0.240820    0.897677    11.00000    0.01811    0.01210 =
         0.02171    0.00170    0.00381   -0.00032
AFIX  13
H22   2    0.638515    0.262547    0.841065    11.00000   -1.20000
AFIX   0
C23   1    0.563535    0.237796    0.974142    11.00000    0.02335    0.03145 =
         0.03347    0.00423    0.01154   -0.00524
AFIX 137
H23A  2    0.586814    0.214678    1.027298    11.00000   -1.50000
H23B  2    0.483759    0.228813    0.937050    11.00000   -1.50000
H23C  2    0.553345    0.267965    1.006963    11.00000   -1.50000
AFIX   0
C24   1    0.689717    0.193176    0.848399    11.00000    0.02181    0.01864 =
         0.03490   -0.00805   -0.00075   -0.00336
AFIX 137
H24A  2    0.757832    0.195537    0.800917    11.00000   -1.50000
H24B  2    0.611840    0.183019    0.810105    11.00000   -1.50000
H24C  2    0.713374    0.170711    0.902878    11.00000   -1.50000
AFIX   0
C25   1    1.093332    0.319408    0.860519    11.00000    0.00866    0.01752 =
         0.03191   -0.00360   -0.00152   -0.00126
AFIX  13
H25   2    1.045149    0.333095    0.798991    11.00000   -1.20000
AFIX   0
C26   1    1.186365    0.283767    0.820768    11.00000    0.01621    0.02944 =
         0.03834   -0.01280    0.00070    0.00041
AFIX 137
H26A  2    1.236551    0.270346    0.879521    11.00000   -1.50000
H26B  2    1.242791    0.298997    0.774266    11.00000   -1.50000
H26C  2    1.139033    0.259248    0.783186    11.00000   -1.50000
AFIX   0
C27   1    1.165630    0.358622    0.917516    11.00000    0.01714    0.02395 =
         0.04912   -0.01161    0.00345   -0.00556
AFIX 137
H27A  2    1.105312    0.380428    0.944804    11.00000   -1.50000
H27B  2    1.218227    0.374733    0.869415    11.00000   -1.50000
H27C  2    1.219603    0.345792    0.974792    11.00000   -1.50000
AFIX   0
C28   1    0.632047    0.432594    0.831382    11.00000    0.01182    0.01412 =
         0.00782   -0.00073    0.00165   -0.00147
AFIX  43
H28   2    0.690969    0.445502    0.787190    11.00000   -1.20000
AFIX   0
C29   1    0.518473    0.459444    0.845195    11.00000    0.01248    0.00986 =
         0.01230   -0.00366   -0.00053   -0.00232
C30   1    0.489463    0.493095    0.769553    11.00000    0.01466    0.01459 =
         0.01363   -0.00123    0.00284   -0.00176
AFIX  43
H30   2    0.546151    0.497745    0.716564    11.00000   -1.20000
AFIX   0
C31   1    0.380256    0.519985    0.769394    11.00000    0.01961    0.01244 =
         0.01762    0.00034   -0.00380    0.00090
AFIX  43
H31   2    0.361578    0.541691    0.715530    11.00000   -1.20000
AFIX   0
C32   1    0.299700    0.514841    0.847887    11.00000    0.01317    0.01296 =
         0.01905   -0.00267   -0.00274    0.00219
AFIX  43
H32   2    0.225948    0.533490    0.848455    11.00000   -1.20000
AFIX   0
C33   1    0.325238    0.482238    0.927502    11.00000    0.00941    0.01207 =
         0.01488   -0.00602   -0.00163   -0.00266
C34   1    0.241107    0.479058    1.009503    11.00000    0.01076    0.01657 =
         0.02049   -0.00630    0.00057    0.00161
AFIX  43
H34   2    0.169257    0.498723    1.008842    11.00000   -1.20000
AFIX   0
C35   1    0.262052    0.448700    1.087477    11.00000    0.01335    0.01891 =
         0.01463   -0.00615    0.00481   -0.00288
AFIX  43
H35   2    0.205009    0.447159    1.141062    11.00000   -1.20000
AFIX   0
C36   1    0.369875    0.418669    1.090216    11.00000    0.01449    0.01539 =
         0.01175   -0.00447    0.00168   -0.00376
C37   1    0.455735    0.420682    1.010214    11.00000    0.01064    0.01222 =
         0.00945   -0.00396   -0.00108   -0.00269
C38   1    0.433849    0.453429    0.926533    11.00000    0.01014    0.01084 =
         0.01155   -0.00422    0.00010   -0.00263
C39   1    0.392816    0.386894    1.170948    11.00000    0.01761    0.02135 =
         0.01140   -0.00274    0.00673   -0.00339
AFIX  43
H39   2    0.336004    0.384726    1.224597    11.00000   -1.20000
AFIX   0
C40   1    0.497579    0.358905    1.172324    11.00000    0.02179    0.01923 =
         0.01116    0.00318    0.00101   -0.00029
AFIX  43
H40   2    0.514829    0.337488    1.227018    11.00000   -1.20000
AFIX   0
C41   1    0.578011    0.362614    1.091728    11.00000    0.01601    0.01519 =
         0.01191   -0.00144    0.00041    0.00338
AFIX  43
H41   2    0.650556    0.343274    1.093049    11.00000   -1.20000
AFIX   0
C42   1    0.881646    0.377505    0.256343    11.00000    0.06249    0.02833 =
         0.02545    0.00508   -0.00758   -0.00254
AFIX  23
H42A  2    0.959562    0.374250    0.218657    11.00000   -1.20000
H42B  2    0.818797    0.394684    0.211350    11.00000   -1.20000
AFIX   0
CL1   4    0.496622    0.335934    0.820035    11.00000    0.00998    0.01686 =
         0.01486   -0.00267    0.00143   -0.00212
CL2   4    0.854757    0.395293    0.997067    11.00000    0.01264    0.01814 =
         0.01422   -0.00383   -0.00172    0.00145
CL3   4    0.915826    0.408832    0.369971    11.00000    0.08792    0.04025 =
         0.03453   -0.00956   -0.00521   -0.01317
CL4   4    0.821445    0.322134    0.282285    11.00000    0.02873    0.02739 =
         0.03253    0.00229   -0.00057    0.00305
N1    3    0.774418    0.357557    0.674150    11.00000    0.01294    0.01268 =
         0.00870   -0.00028    0.00235    0.00277
N2    3    0.829989    0.305744    0.790837    11.00000    0.00906    0.01054 =
         0.00991   -0.00057    0.00118    0.00194
N3    3    0.558393    0.391975    1.012642    11.00000    0.01258    0.01334 =
         0.00977   -0.00262   -0.00012   -0.00130
HKLF 4

REM  AT235 in P2(1)/n
REM R1 =  0.0321 for    6749 Fo > 4sig(Fo)  and  0.0437 for all    8083 data
REM    459 parameters refined using    140 restraints

END

WGHT      0.0310      5.2187

REM Instructions for potential hydrogen bonds
EQIV $1 x, y, z-1
HTAB C42 Cl2_$1

REM Highest difference peak  1.205,  deepest hole -1.063,  1-sigma level  0.076
Q1    1   0.9986  0.4092  0.3405  11.00000  0.05    1.21
Q2    1   0.6728  0.3943  0.8274  11.00000  0.05    1.15
Q3    1   1.0756  0.4145  0.3367  11.00000  0.05    0.57
Q4    1   0.8230  0.3792  0.3221  11.00000  0.05    0.45
Q5    1   0.8960  0.4329  0.6784  11.00000  0.05    0.43
Q6    1   0.8048  0.3709  0.3516  11.00000  0.05    0.39
Q7    1   0.7970  0.4207  0.6333  11.00000  0.05    0.38
Q8    1   0.8356  0.2937  0.7434  11.00000  0.05    0.37
Q9    1   0.6576  0.4169  0.8812  11.00000  0.05    0.36
Q10   1   0.5416  0.3635  0.4998  11.00000  0.05    0.36
Q11   1   0.4416  0.4334  0.9632  11.00000  0.05    0.35
Q12   1   0.8350  0.2741  0.9227  11.00000  0.05    0.35
Q13   1   0.6815  0.4049  0.6000  11.00000  0.05    0.34
Q14   1   0.8485  0.2933  0.8410  11.00000  0.05    0.34
Q15   1   0.3727  0.3976  1.1223  11.00000  0.05    0.34
Q16   1   0.7647  0.3825  0.6624  11.00000  0.05    0.34
Q17   1   0.4803  0.3427  1.1776  11.00000  0.05    0.32
Q18   1   0.6682  0.2176  0.8854  11.00000  0.05    0.32
Q19   1   0.5910  0.3895  0.5606  11.00000  0.05    0.32
Q20   1   0.4837  0.4576  0.8931  11.00000  0.05    0.32
;
_shelx_res_checksum   49965

_shelx_hkl_file
;
  -1   0   0    0.30    0.50
  -2   0   0   22.30    1.30
  -2   0   0   22.50    1.30
  -2   0   0   22.00    3.10
   2   0   0   21.20    1.30
   2   0   0   22.40    2.90
   2   0   0   19.50    1.30
  -3   0   0   -2.70    2.60
  -3   0   0   -2.30    0.90
  -3   0   0   -1.50    0.90
   3   0   0   -0.30    1.00
   3   0   0   -2.20    2.60
   3   0   0   -2.90    0.90
  -4   0   0  200.28    5.40
  -4   0   0  199.78    5.40
  -4   0   0  201.88    9.30
   4   0   0  213.08    9.50
   4   0   0  201.78    5.60
  -5   0   0   -2.50    3.00
  -5   0   0   -1.30    2.60
   5   0   0    1.30    3.20
   5   0   0    0.50    0.90
   5   0   0   -0.20    0.90
  -6   0   0 1928.51   51.19
  -6   0   0 2035.30   52.99
   6   0   0 2030.30   53.29
  -7   0   0   -2.90    3.50
  -7   0   0    0.30    3.70
   7   0   0   -5.90    3.80
  -8   0   0   85.99    9.20
  -8   0   0   69.29    8.50
   8   0   0   74.29    8.90
  -9   0   0   -5.30    4.00
 -10   0   0    4.00    5.40
 -10   0   0    3.40    5.00
 -11   0   0    7.50    5.90
 -11   0   0    0.20    5.10
 -12   0   0  326.87   19.30
 -12   0   0  338.27   19.00
 -13   0   0    3.30    6.40
 -13   0   0    5.70    6.60
 -13   0   1    1.70    6.30
 -13   0   1    5.10    6.30
 -12   0   1    1.20    5.50
 -12   0   1   -0.10    5.30
 -11   0   1  531.75   22.40
 -11   0   1  486.95   22.20
 -10   0   1   -1.40    4.30
  -9   0   1  648.44   23.20
  -9   0   1  625.44   24.60
   8   0  -1   -4.20    3.50
  -8   0   1    3.10    4.00
  -8   0   1    4.40    4.50
   7   0  -1  303.87   14.50
  -7   0   1  297.07   13.20
  -7   0   1  312.87   14.50
   6   0  -1   -1.20    3.30
  -6   0   1   -4.60    2.60
  -6   0   1   -1.50    2.90
   5   0  -1  565.64   18.60
  -5   0   1  556.74   18.30
  -5   0   1  547.95   17.20
   4   0  -1   -0.10    2.50
  -4   0   1    1.20    2.30
  -4   0   1   -4.30    2.40
   3   0  -1   62.39    2.40
   3   0  -1   51.49    4.70
   3   0  -1   56.49    2.40
  -3   0   1   60.19    2.30
  -3   0   1   61.49    2.40
  -3   0   1   58.99    4.30
  -3   0   1   54.29    4.90
   2   0  -1   -1.20    0.90
   2   0  -1   -1.40    1.60
   2   0  -1   -0.20    0.90
  -2   0   1   -0.10    0.90
  -2   0   1   -1.70    1.20
  -2   0   1    0.10    0.90
  -2   0   1   -1.70    1.50
   1   0  -1   61.59    2.40
  -1   0   1   57.39    2.30
  -1   0   1   63.99    2.40
  -1   0   1   61.19    2.00
  -1   0   1   59.69    2.40
  -1   0  -1 2306.47   53.29
  -1   0  -1 2288.47   53.09
  -1   0  -1 2238.58   53.09
  -1   0  -1 2252.67   52.89
   1   0   1 2231.68   53.09
   1   0   1 2283.17   52.89
  -2   0  -1   -1.90    1.30
  -2   0  -1   -0.60    2.10
  -2   0  -1   -3.40    1.30
   2   0   1   -3.50    0.30
   2   0   1   -2.50    2.10
   2   0   1   -3.70    1.30
  -3   0  -1  980.10   26.90
  -3   0  -1 1009.10   24.80
  -3   0  -1 1044.00   24.80
   3   0   1  997.60   27.10
   3   0   1  997.60   24.80
  -4   0  -1    0.30    1.30
  -4   0  -1    0.60    1.30
  -4   0  -1    0.10    2.50
   4   0   1    1.20    1.40
   4   0   1    0.10    1.40
   4   0   1   -3.70    2.20
  -5   0  -1    1.60    3.30
  -5   0  -1    2.40    1.50
  -5   0  -1    0.90    1.40
   5   0   1    2.90    1.50
   5   0   1    5.30    1.70
   5   0   1    2.90    3.60
  -6   0  -1   -0.10    1.30
  -6   0  -1    1.30    1.30
  -6   0  -1    2.50    3.40
   6   0   1   -0.30    1.30
   6   0   1   -0.70    1.30
   6   0   1   -2.60    3.10
  -7   0  -1   21.20    5.10
  -7   0  -1   12.60    1.60
  -7   0  -1    7.80    4.40
  -7   0  -1   13.10    1.70
   7   0   1    7.10    1.80
   7   0   1    6.70    4.80
  -8   0  -1   -0.60    4.20
  -8   0  -1    0.70    4.00
  -8   0  -1    0.90    4.60
   8   0   1    4.00    4.80
  -9   0  -1   36.10    7.00
  -9   0  -1   35.00    7.10
   9   0   1   26.90    6.90
 -10   0  -1   -6.00    4.50
 -10   0  -1    2.60    5.10
 -11   0  -1  172.68   14.20
 -11   0  -1  147.39   14.00
 -12   0  -1    5.50    6.50
 -12   0  -1  -10.10    5.40
 -13   0  -1   30.50    8.90
 -13   0  -1   24.10    9.10
 -13   0   2    4.00    6.00
 -13   0   2   -9.10    5.30
 -12   0   2  103.09   12.00
 -12   0   2  104.09   11.20
 -11   0   2   -0.40    4.70
 -11   0   2    7.30    5.20
 -10   0   2   -5.90    3.80
  -9   0   2    5.70    4.20
  -9   0   2   -0.90    4.20
  -8   0   2  668.43   22.10
  -8   0   2  653.73   23.70
  -7   0   2    2.20    3.30
  -7   0   2    1.90    3.80
   6   0  -2  123.79    8.60
  -6   0   2  124.99    7.40
  -6   0   2  122.89    8.60
   5   0  -2    1.00    1.10
   5   0  -2    1.80    2.90
   5   0  -2    1.60    1.10
  -5   0   2   -1.10    2.20
  -5   0   2    0.50    1.00
  -5   0   2    1.60    1.00
  -5   0   2   -2.90    2.40
   4   0  -2  635.34   16.10
   4   0  -2  620.64   18.60
   4   0  -2  640.54   16.10
  -4   0   2  612.34   18.50
  -4   0   2  637.44   15.90
  -4   0   2  636.64   17.30
  -4   0   2  632.94   15.90
   3   0  -2   -2.40    2.10
   3   0  -2   -0.40    1.40
   3   0  -2   -0.30    1.30
  -3   0   2   -0.80    1.90
  -3   0   2    1.30    1.40
  -3   0   2   -0.30    1.60
  -3   0   2    1.40    1.40
   2   0  -2 1470.75   33.80
   2   0  -2 1456.15   35.20
  -2   0   2 1442.46   34.70
  -2   0   2 1451.35   35.10
  -2   0   2 1449.76   33.80
  -2   0   2 1462.65   35.20
   1   0  -2    0.00    0.80
   1   0  -2   -0.10    1.00
   1   0  -2    0.80    0.70
   1   0  -2    1.50    1.60
   1   0  -2   -0.40    1.40
  -1   0   2    0.10    1.40
  -1   0   2    1.00    0.70
  -1   0   2   -0.40    1.30
  -1   0   2    0.30    1.00
  -1   0   2    0.30    0.90
   0   0  -2  276.47    8.00
   0   0  -2  284.87    8.60
   0   0  -2  279.57    8.70
   0   0   2  278.17    7.30
   0   0   2  272.67    8.50
   0   0   2  277.57    7.60
   0   0   2  275.97    8.60
   0   0   2  281.67    7.90
  -1   0  -2    0.20    1.70
  -1   0  -2    0.40    1.50
  -1   0  -2   -1.70    1.60
  -1   0  -2   -0.40    1.40
   1   0   2   -1.60    1.60
   1   0   2    0.90    1.60
   1   0   2   -2.20    1.70
   1   0   2    0.90    1.60
  -2   0  -2  939.71   25.20
  -2   0  -2  943.21   24.60
  -2   0  -2  990.50   24.70
  -2   0  -2  951.70   25.40
   2   0   2  995.50   24.70
   2   0   2  960.20   25.30
   2   0   2  951.50   24.70
  -3   0  -2   -1.10    2.50
  -3   0  -2   -2.90    1.60
  -3   0  -2   -0.40    1.80
  -3   0  -2    1.10    2.80
   3   0   2    2.00    2.70
   3   0   2    2.60    1.90
   3   0   2   -1.60    1.80
  -4   0  -2 2524.35   62.59
  -4   0  -2 2577.54   60.29
  -4   0  -2 2511.45   62.59
  -4   0  -2 2602.64   60.19
   4   0   2 2578.74   62.89
   4   0   2 2192.38   59.89
   4   0   2 2547.65   60.39
  -5   0  -2    1.00    3.30
  -5   0  -2   -1.20    1.70
  -5   0  -2   -1.20    1.60
  -5   0  -2    2.00    3.30
   5   0   2    0.70    1.90
   5   0   2    0.70    3.00
   5   0   2   -0.20    0.50
  -6   0  -2   22.90    5.40
  -6   0  -2   30.60    3.60
  -6   0  -2   24.40    5.40
  -6   0  -2   27.40    3.40
   6   0   2   31.00    3.60
   6   0   2   32.90    6.00
   6   0   2   28.80    3.70
  -7   0  -2    2.70    1.90
  -7   0  -2    0.50    4.00
  -7   0  -2   -0.50    1.80
  -7   0  -2    8.80    4.80
   7   0   2    1.20    1.90
   7   0   2    0.20    2.00
   7   0   2    3.00    4.30
  -8   0  -2   80.29    9.20
  -8   0  -2   98.89   10.70
  -8   0  -2   94.39    4.80
  -8   0  -2   81.89    9.60
   8   0   2   79.99   10.40
   8   0   2   94.59    5.00
   8   0   2   88.79    5.10
  -9   0  -2    0.30    4.80
  -9   0  -2   -1.00    5.10
   9   0   2   -1.00    1.50
   9   0   2    1.20    4.60
 -10   0  -2  675.83   26.90
 -10   0  -2  633.44   26.50
 -11   0  -2   -8.60    5.30
 -11   0  -2    0.60    6.50
 -12   0  -2    3.40    6.60
 -12   0  -2   14.60    7.60
 -13   0  -2    4.30    7.00
 -13   0  -2    5.50    7.20
 -13   0   3  189.08   15.20
 -12   0   3    2.20    4.80
 -12   0   3   -0.80    5.00
 -11   0   3   15.90    5.70
 -10   0   3   -3.20    3.90
  -9   0   3   12.80    4.60
  -9   0   3   11.90    4.90
  -8   0   3   -0.50    3.30
  -8   0   3    0.20    3.90
  -7   0   3 1405.06   37.70
  -7   0   3 1457.25   40.20
   6   0  -3   -0.60    1.40
   6   0  -3   -0.70    1.40
  -6   0   3   -1.50    2.60
  -6   0   3    2.00    2.40
  -6   0   3    2.60    1.40
  -6   0   3    2.10    1.40
   5   0  -3   51.09    3.50
   5   0  -3   51.19    3.60
  -5   0   3   52.69    5.50
  -5   0   3   47.90    4.30
  -5   0   3   43.10    3.30
  -5   0   3   54.79    3.40
   4   0  -3   -1.20    0.60
   4   0  -3   -0.20    1.70
  -4   0   3   -1.50    1.50
  -4   0   3    2.60    2.20
  -4   0   3   -0.20    1.60
  -4   0   3    0.40    1.60
   3   0  -3 2803.62   63.79
   3   0  -3 2853.71   66.29
   3   0  -3 2738.43   66.19
  -3   0   3 2745.13   66.09
  -3   0   3 2757.62   65.29
  -3   0   3 2710.03   63.59
  -3   0   3 2799.82   66.09
   2   0  -3   -0.30    2.20
   2   0  -3    0.80    2.20
   2   0  -3    0.90    1.00
  -2   0   3   -4.10    2.00
  -2   0   3    0.00    1.10
  -2   0   3   -2.00    1.10
  -2   0   3   -1.00    2.00
  -2   0   3   -1.10    1.20
  -2   0   3    1.30    1.80
   1   0  -3 9083.49  220.18
   1   0  -3 9424.36  217.58
   1   0  -3 9999.00  213.28
   1   0  -3 9423.26  220.28
  -1   0   3 9589.14  220.18
  -1   0   3 9543.65  223.98
  -1   0   3 9167.88  210.48
  -1   0   3 9877.51  224.48
   0   0  -3    0.40    1.30
   0   0  -3   -0.80    2.20
   0   0  -3    0.70    2.10
   0   0  -3   -0.30    2.10
   0   0  -3   -2.40    2.00
   0   0   3   -2.30    1.20
   0   0   3    1.60    1.80
   0   0   3    0.70    2.10
   0   0   3    2.60    1.80
   0   0   3    1.60    2.30
  -1   0  -3  477.25   14.30
  -1   0  -3  466.85   14.30
  -1   0  -3  459.85   14.00
  -1   0  -3  453.45   12.70
  -1   0  -3  461.05   13.20
   1   0   3  464.95   13.30
   1   0   3  471.75   14.30
   1   0   3  460.85   14.20
   1   0   3  458.45   13.80
  -2   0  -3   -3.30    2.80
  -2   0  -3   -1.40    2.20
  -2   0  -3    0.30    2.50
  -2   0  -3   -4.10    2.40
   2   0   3   -0.50    2.30
   2   0   3    0.30    2.50
   2   0   3   -3.80    2.20
  -3   0  -3  177.18    7.70
  -3   0  -3  159.98    8.50
  -3   0  -3  179.18    7.60
   3   0   3  172.78    7.80
   3   0   3  177.48    8.80
   3   0   3  174.58    7.60
  -4   0  -3   -1.60    2.50
  -4   0  -3   -0.50    2.90
  -4   0  -3   -0.60    2.00
  -4   0  -3    0.20    2.10
   4   0   3   -1.20    2.00
   4   0   3   -1.30    2.20
   4   0   3    1.30    2.80
  -5   0  -3 2732.53   69.69
  -5   0  -3 2690.33   66.49
  -5   0  -3 2681.93   69.39
  -5   0  -3 2788.42   66.69
   5   0   3 2736.83   66.89
   5   0   3 2747.43   69.69
   5   0   3 2749.02   66.89
  -6   0  -3   -3.20    3.70
  -6   0  -3    1.10    3.70
  -6   0  -3   -2.10    2.10
   6   0   3    0.70    3.40
   6   0   3   -2.00    2.10
   6   0   3    1.80    2.40
  -7   0  -3    6.60    5.00
  -7   0  -3    4.40    2.60
  -7   0  -3    7.30    4.90
   7   0   3    9.40    3.00
   7   0   3    1.20    4.80
  -8   0  -3   -0.60    4.60
  -8   0  -3   -1.10    2.20
  -8   0  -3   -4.80    4.60
   8   0   3    0.30    4.70
   8   0   3   -2.30    2.20
   8   0   3   -1.30    2.30
  -9   0  -3    1.80    2.30
  -9   0  -3    4.70    5.80
  -9   0  -3   -2.40    4.60
   9   0   3   -3.30    4.60
   9   0   3   -0.70    2.00
   9   0   3    4.50    2.50
 -10   0  -3    8.10    6.70
 -10   0  -3    0.50    6.00
  10   0   3    1.20    2.10
 -11   0  -3   93.69   12.70
 -11   0  -3  112.99   13.30
 -12   0  -3   -4.90    6.20
 -12   0  -3   11.10    7.00
 -13   0  -3    0.90    7.50
 -13   0  -3   13.40    8.20
 -13   0   4    7.20    6.30
 -12   0   4  550.54   23.20
 -12   0   4  511.75   21.30
 -11   0   4   -0.30    4.30
 -10   0   4    8.50    4.20
  -9   0   4    7.00    4.50
  -9   0   4   -2.20    3.30
   8   0  -4   21.20    2.30
  -8   0   4   17.00    4.00
  -8   0   4   19.70    5.20
   7   0  -4   -1.30    1.80
   7   0  -4    3.00    1.90
  -7   0   4    2.70    3.40
  -7   0   4    1.30    1.70
  -7   0   4    1.00    1.70
  -7   0   4    0.00    2.70
   6   0  -4  188.08    7.40
   6   0  -4  182.78    7.30
  -6   0   4  169.28    9.20
  -6   0   4  190.98    7.20
  -6   0   4  199.88    7.30
  -6   0   4  170.98    7.70
   5   0  -4    4.10    2.20
   5   0  -4    0.30    0.60
  -5   0   4    0.70    1.90
  -5   0   4    0.60    2.30
  -5   0   4    0.20    1.70
  -5   0   4    2.30    1.90
   4   0  -4  793.52   21.90
   4   0  -4  809.42   22.00
  -4   0   4  786.02   21.80
  -4   0   4  801.02   21.50
  -4   0   4  792.22   19.80
  -4   0   4  799.72   21.80
  -4   0   4  799.72   21.50
   3   0  -4   -1.40    2.10
   3   0  -4   -1.50    2.10
   3   0  -4   -0.70    1.10
  -3   0   4   -1.30    1.40
  -3   0   4    1.10    2.10
  -3   0   4    1.20    1.20
  -3   0   4    1.10    1.20
  -3   0   4    0.40    2.00
  -3   0   4    0.40    1.80
   2   0  -4  106.19    3.80
   2   0  -4  112.59    5.10
   2   0  -4  118.19    4.10
   2   0  -4  117.39    6.40
   2   0  -4  115.59    6.50
  -2   0   4  109.19    6.30
  -2   0   4  118.39    3.70
  -2   0   4  113.59    5.00
  -2   0   4  116.69    5.20
  -2   0   4  121.79    6.40
   1   0  -4    2.40    2.00
   1   0  -4    0.00    2.60
   1   0  -4   -0.20    2.50
   1   0  -4   -0.20    1.90
  -1   0   4    4.30    2.50
  -1   0   4   -0.20    2.10
  -1   0   4    2.00    1.90
  -1   0   4   -2.00    1.80
   0   0  -4  845.22   21.70
   0   0  -4  832.12   23.90
   0   0  -4  842.82   23.80
   0   0  -4  860.71   22.70
   0   0  -4  850.01   21.20
   0   0   4  882.41   24.00
   0   0   4  873.91   22.60
   0   0   4  878.81   21.80
   0   0   4  838.52   24.00
   0   0   4  849.81   21.10
  -1   0  -4    0.50    2.60
  -1   0  -4   -2.80    2.60
  -1   0  -4    2.20    2.90
  -1   0  -4    0.40    2.00
  -1   0  -4   -2.50    2.10
   1   0   4   -2.70    2.20
   1   0   4    1.40    2.60
   1   0   4    0.00    2.00
   1   0   4    0.50    2.50
   1   0   4   -0.80    0.40
  -2   0  -4  357.26   11.00
  -2   0  -4  343.67   12.70
  -2   0  -4  395.16   13.00
  -2   0  -4  359.86   12.80
  -2   0  -4  358.16   12.20
   2   0   4  339.87   12.50
   2   0   4  366.56   12.80
   2   0   4  361.76   12.60
   2   0   4  341.47   12.10
  -3   0  -4   -0.60    2.30
  -3   0  -4    1.80    3.00
  -3   0  -4    2.60    2.50
  -3   0  -4    2.60    2.50
   3   0   4    0.60    2.60
   3   0   4   -0.40    2.60
   3   0   4    3.10    2.50
  -4   0  -4   25.20    3.90
  -4   0  -4   25.80    4.70
  -4   0  -4   26.00    4.70
  -4   0  -4   16.50    3.60
   4   0   4   23.10    3.90
   4   0   4   20.70    4.10
   4   0   4   23.10    4.00
  -5   0  -4   -1.20    3.90
  -5   0  -4    1.40    3.30
  -5   0  -4    0.20    2.40
   5   0   4    1.00    3.40
   5   0   4    1.00    2.50
   5   0   4   -1.00    2.50
  -6   0  -4   33.90    4.60
  -6   0  -4   28.00    5.70
  -6   0  -4   29.10    5.90
   6   0   4   33.00    4.90
   6   0   4   24.30    4.10
   6   0   4   34.70    6.40
  -7   0  -4   -4.70    5.10
  -7   0  -4   -3.60    4.20
  -7   0  -4   -0.90    2.50
   7   0   4    0.60    2.70
   7   0   4    1.60    2.90
   7   0   4   -0.70    5.00
  -8   0  -4  381.56   13.60
  -8   0  -4  370.86   18.80
   8   0   4  318.77   17.80
   8   0   4  385.86   14.10
  -9   0  -4   -3.60    5.10
  -9   0  -4   -3.20    5.30
   9   0   4   -1.20    4.50
   9   0   4   -1.10    2.60
 -10   0  -4  285.47   18.00
 -10   0  -4  291.77   18.00
  10   0   4  288.47   11.50
 -11   0  -4    2.60    6.50
 -11   0  -4    8.30    6.60
  11   0   4    0.10    2.30
 -12   0  -4  101.19   14.10
 -12   0  -4  136.89   14.90
 -11   0   5  110.39    9.30
 -10   0   5    0.20    3.40
 -10   0   5    3.30    5.00
  -9   0   5  543.75   17.90
  -9   0   5  515.25   20.60
   8   0  -5   -0.10    2.20
   8   0  -5   -1.00    2.00
  -8   0   5   -5.70    3.20
  -8   0   5   -0.10    1.90
  -8   0   5    3.00    3.00
   7   0  -5   82.09    5.70
   7   0  -5   83.49    5.50
  -7   0   5   79.69    5.70
  -7   0   5   85.29    7.50
  -7   0   5   83.49    5.20
   6   0  -5   -0.80    2.40
   6   0  -5   -0.70    0.80
  -6   0   5   -1.80    1.90
  -6   0   5   -1.70    2.50
  -6   0   5    0.40    2.00
  -6   0   5    0.80    2.60
   5   0  -5  532.05   16.50
   5   0  -5  508.75   16.40
  -5   0   5  499.85   15.70
  -5   0   5  532.75   16.20
  -5   0   5  525.85   16.30
  -5   0   5  518.55   15.90
  -5   0   5  508.35   13.80
   4   0  -5   -4.70    2.00
   4   0  -5    0.60    2.40
   4   0  -5    0.20    1.10
  -4   0   5    3.00    2.20
  -4   0   5    0.30    2.40
  -4   0   5    0.50    1.30
  -4   0   5   -1.10    1.70
  -4   0   5   -0.50    2.20
   3   0  -5 2433.36   61.79
   3   0  -5 2510.85   57.09
   3   0  -5 2521.25   61.89
  -3   0   5 2529.95   56.99
  -3   0   5 2506.85   61.79
  -3   0   5 2432.46   61.49
  -3   0   5 2474.25   59.39
  -3   0   5 2465.95   57.79
   2   0  -5   -1.90    1.40
   2   0  -5   -0.10    1.20
   2   0  -5    3.20    2.60
   2   0  -5    1.40    2.80
   2   0  -5   -0.40    1.80
  -2   0   5   -1.70    1.80
  -2   0   5    0.70    1.80
  -2   0   5    0.50    2.50
  -2   0   5   -1.10    2.30
   1   0  -5  141.59    6.30
   1   0  -5  142.29    6.50
   1   0  -5  152.58    8.10
   1   0  -5  160.78    8.10
  -1   0   5  151.58    6.50
  -1   0   5  144.99    4.20
  -1   0   5  140.59    7.70
  -1   0   5  140.39    6.50
  -1   0   5  142.39    7.80
   0   0  -5   -0.10    2.50
   0   0  -5   -2.00    2.10
   0   0  -5   -1.90    2.70
   0   0  -5   -1.30    2.20
   0   0   5   -0.10    1.50
   0   0   5   -1.10    2.70
   0   0   5   -3.80    2.50
   0   0   5   -0.80    2.20
   0   0   5    0.60    2.20
  -1   0  -5  221.48   10.20
  -1   0  -5  196.68    8.20
  -1   0  -5  209.88    8.10
  -1   0  -5  215.48    9.90
  -1   0  -5  204.18    9.10
   1   0   5  209.18    9.90
   1   0   5  205.18    8.90
   1   0   5  214.58    8.20
   1   0   5  212.38    8.10
   1   0   5  196.28    9.50
  -2   0  -5   -2.90    2.20
  -2   0  -5    2.40    3.10
  -2   0  -5   -2.10    2.80
  -2   0  -5   -1.40    2.10
  -2   0  -5   -4.80    2.20
   2   0   5    0.20    2.20
   2   0   5   -1.20    2.50
   2   0   5   -2.10    2.10
   2   0   5    0.30    2.90
  -3   0  -5 2236.38   52.09
  -3   0  -5 2233.98   55.79
  -3   0  -5 2235.38   56.39
  -3   0  -5 2195.68   56.39
  -3   0  -5 2153.28   56.59
   3   0   5 2163.08   56.29
   3   0   5 2198.58   56.69
   3   0   5 2178.78   55.79
  -4   0  -5    0.90    3.00
  -4   0  -5   -2.00    2.90
  -4   0  -5    6.60    4.20
   4   0   5    0.50    2.90
   4   0   5   -2.80    2.90
   4   0   5    1.00    2.80
  -5   0  -5   90.89    9.20
  -5   0  -5   99.99    7.50
  -5   0  -5   92.19    8.60
   5   0   5   75.09    8.30
   5   0   5   95.19    7.20
   5   0   5   93.39    7.40
  -6   0  -5    0.90    3.30
  -6   0  -5    7.60    4.70
  -6   0  -5   -6.40    3.80
   6   0   5    1.60    3.20
   6   0   5    1.20    4.40
   6   0   5    0.30    3.00
  -7   0  -5   86.19   10.20
  -7   0  -5   60.79    8.70
  -7   0  -5   69.09    6.70
   7   0   5   68.29    6.80
   7   0   5   67.89    9.30
   7   0   5   59.69    7.00
  -8   0  -5   -7.80    5.20
  -8   0  -5   -1.60    3.10
   8   0   5    3.10    3.50
   8   0   5   -5.70    5.00
   8   0   5   -3.10    2.90
  -9   0  -5  310.07   18.20
  -9   0  -5  284.77   17.40
   9   0   5  336.07   13.90
   9   0   5  344.47   19.20
 -10   0  -5   -3.00    5.50
 -10   0  -5   -1.90    5.50
  10   0   5   -4.90    2.80
 -11   0  -5   -6.70    6.20
 -11   0  -5   -4.10    6.10
  11   0   5    0.30    3.00
 -12   0  -5    9.50    7.70
 -12   0  -5   11.70    8.10
 -10   0   6  101.59    7.50
 -10   0   6   86.39    9.70
   9   0  -6    0.50    2.20
   9   0  -6    0.90    2.10
  -9   0   6   -0.80    2.60
  -9   0   6   -3.20    3.70
   8   0  -6  828.72   23.80
   8   0  -6  846.32   24.00
  -8   0   6  828.72   23.50
  -8   0   6  854.11   25.90
  -8   0   6  848.32   26.60
  -8   0   6  858.21   23.10
   7   0  -6   -3.60    2.80
  -7   0   6    0.10    2.20
  -7   0   6   -1.40    2.90
  -7   0   6    0.80    2.90
  -7   0   6    0.10    2.50
   6   0  -6    3.00    3.20
   6   0  -6    6.90    3.20
  -6   0   6    5.70    3.00
  -6   0   6    7.30    3.10
  -6   0   6    6.70    2.00
  -6   0   6    7.40    3.00
   5   0  -6   -0.70    2.60
   5   0  -6   -1.40    2.90
  -5   0   6   -0.50    2.60
  -5   0   6    0.50    2.40
  -5   0   6    1.80    2.10
   4   0  -6  584.64   18.80
   4   0  -6  580.64   18.80
   4   0  -6  571.14   14.20
  -4   0   6  562.94   15.20
  -4   0   6  560.34   16.50
  -4   0   6  542.15   18.30
   3   0  -6   -1.00    3.00
   3   0  -6    3.00    3.00
   3   0  -6   -0.80    1.90
   3   0  -6    0.10    1.20
  -3   0   6   -0.60    2.00
  -3   0   6   -1.10    2.90
  -3   0   6    1.30    2.10
   2   0  -6 1412.26   35.60
   2   0  -6 1382.46   38.40
   2   0  -6 1392.86   38.30
   2   0  -6 1377.46   33.50
   2   0  -6 1400.76   34.10
  -2   0   6 1420.26   34.80
  -2   0   6 1436.16   38.50
  -2   0   6 1431.96   38.30
  -2   0   6 1392.66   35.40
   1   0  -6   -0.50    2.30
   1   0  -6   -3.10    2.00
   1   0  -6    0.90    3.30
   1   0  -6    2.00    2.90
  -1   0   6    0.60    2.20
  -1   0   6    1.30    3.00
  -1   0   6   -2.50    1.90
  -1   0   6   -0.80    2.70
  -1   0   6   -0.40    0.90
   0   0  -6   -0.60    2.60
   0   0  -6   -4.80    3.10
   0   0  -6    2.70    2.50
   0   0  -6    0.90    3.10
   0   0   6    2.60    3.40
   0   0   6    2.20    2.30
   0   0   6    5.20    3.20
   0   0   6    3.40    1.70
   0   0   6    3.70    2.60
  -1   0  -6    3.70    3.10
  -1   0  -6    0.20    2.50
  -1   0  -6   -1.20    2.00
  -1   0  -6    1.80    3.00
  -1   0  -6   -3.90    2.80
   1   0   6    1.00    2.70
   1   0   6   -4.40    2.00
   1   0   6   -6.90    3.00
   1   0   6   -1.50    3.00
   1   0   6   -0.50    2.00
  -2   0  -6  136.69    7.70
  -2   0  -6  139.89    8.90
  -2   0  -6  149.59    9.30
  -2   0  -6  142.49    7.70
   2   0   6  160.98    9.60
   2   0   6  150.88    8.00
   2   0   6  154.38    8.70
   2   0   6  158.98    9.40
  -3   0  -6    1.10    2.60
  -3   0  -6   -0.20    2.90
  -3   0  -6    0.80    3.40
  -3   0  -6    4.30    3.80
   3   0   6   -0.60    3.10
   3   0   6    2.80    3.30
   3   0   6    2.40    2.90
  -4   0  -6 1678.93   48.10
  -4   0  -6 1764.82   47.50
  -4   0  -6 1755.72   43.40
  -4   0  -6 1799.12   47.50
   4   0   6 1728.33   47.40
   4   0   6 1783.62   47.90
   4   0   6 1759.52   47.60
  -5   0  -6   -0.10    3.60
  -5   0  -6   -4.00    4.00
  -5   0  -6    1.20    3.50
   5   0   6   -1.00    3.20
   5   0   6   -4.90    3.50
   5   0   6   -1.20    3.40
  -6   0  -6  201.18   10.90
  -6   0  -6  175.88   12.40
  -6   0  -6  185.48   13.20
   6   0   6  186.78   12.20
   6   0   6  159.28   10.50
   6   0   6  186.08   10.90
  -7   0  -6   -0.20    5.00
  -7   0  -6   -6.20    3.20
   7   0   6   -1.30    3.30
   7   0   6   -5.50    4.50
   7   0   6    1.70    3.80
  -8   0  -6    3.40    3.80
  -8   0  -6   -3.70    5.20
   8   0   6    0.80    3.70
   8   0   6    6.80    3.80
   8   0   6   -0.70    5.20
  -9   0  -6    4.30    5.90
  -9   0  -6    0.30    5.70
   9   0   6   -2.90    3.30
   9   0   6    0.80    5.40
 -10   0  -6  132.29   13.60
 -10   0  -6  162.28   14.30
  10   0   6  144.89    9.90
 -11   0  -6   -4.10    6.40
 -11   0  -6   -6.50    5.50
  11   0   6   -4.70    3.10
 -12   0  -6  151.88   16.80
 -12   0  -6  163.68   16.90
  12   0   6  159.28    9.30
  10   0  -7    3.00    2.30
   9   0  -7   24.80    4.10
  -9   0   7   23.30    5.10
  -9   0   7   27.90    3.60
   8   0  -7    4.00    3.10
  -8   0   7   -0.40    1.80
  -8   0   7    0.20    3.30
  -8   0   7   -0.40    3.20
  -8   0   7    2.20    2.70
   7   0  -7  209.08   10.40
   7   0  -7  214.38   10.80
  -7   0   7  234.28   10.50
  -7   0   7  205.28   10.10
  -7   0   7  222.78    7.10
  -7   0   7  218.68   10.30
   6   0  -7    1.70    3.40
   6   0  -7   -0.60    2.80
  -6   0   7    0.40    2.40
  -6   0   7   -1.80    2.90
  -6   0   7   -0.90    2.90
   5   0  -7  291.77   13.30
   5   0  -7  328.67   13.50
  -5   0   7  302.27   13.10
  -5   0   7  319.87   11.40
  -5   0   7  311.47   10.10
   4   0  -7   -0.90    3.10
   4   0  -7    1.80    1.20
   4   0  -7    1.10    3.40
  -4   0   7    2.30    2.50
  -4   0   7   -1.80    2.70
  -4   0   7    0.30    1.10
   3   0  -7   11.40    2.80
   3   0  -7   16.50    4.40
   3   0  -7   10.60    4.10
   3   0  -7    9.00    1.80
   3   0  -7    9.00    1.60
  -3   0   7    7.70    3.90
  -3   0   7    9.30    2.70
   2   0  -7    0.10    3.00
   2   0  -7    0.60    2.30
   2   0  -7    1.80    3.20
   2   0  -7   -2.30    2.00
   2   0  -7    1.80    1.70
  -2   0   7   -2.30    2.40
  -2   0   7    2.50    2.40
  -2   0   7   -1.80    3.10
   1   0  -7  492.75   15.10
   1   0  -7  467.45   15.50
   1   0  -7  486.15   17.90
   1   0  -7  488.95   17.80
  -1   0   7  467.95   15.40
  -1   0   7  468.75   17.80
  -1   0   7  483.25   15.30
   0   0  -7    6.90    3.90
   0   0  -7    3.60    2.80
   0   0  -7    0.70    3.80
   0   0  -7    1.60    2.90
   0   0   7    0.70    2.70
   0   0   7   -0.80    1.70
   0   0   7   -2.30    3.30
   0   0   7   -2.70    2.40
  -1   0  -7    4.20    3.10
  -1   0  -7    9.70    3.50
  -1   0  -7    4.70    4.40
  -1   0  -7    7.40    2.60
   1   0   7    2.40    3.40
   1   0   7    4.70    3.10
   1   0   7   10.50    2.70
   1   0   7    2.10    2.90
   1   0   7    4.20    3.60
  -2   0  -7    0.40    3.60
  -2   0  -7   -0.90    2.90
  -2   0  -7   -1.00    2.50
  -2   0  -7    1.60    3.50
   2   0   7   -0.20    3.10
   2   0   7   -2.60    2.30
   2   0   7    1.80    3.20
   2   0   7    0.10    3.50
  -3   0  -7  649.74   19.80
  -3   0  -7  643.44   22.40
  -3   0  -7  617.34   21.00
  -3   0  -7  646.74   22.50
   3   0   7  671.53   21.50
   3   0   7  629.24   22.60
   3   0   7  660.43   22.70
  -4   0  -7   -0.90    3.70
  -4   0  -7   -1.20    2.70
  -4   0  -7    1.30    4.40
  -4   0  -7    0.90    3.40
   4   0   7   -5.60    3.00
   4   0   7   -1.10    3.20
   4   0   7   -0.10    3.60
  -5   0  -7  455.15   18.90
  -5   0  -7  488.75   16.30
  -5   0  -7  447.26   18.30
  -5   0  -7  460.25   20.10
   5   0   7  464.75   19.20
   5   0   7  456.85   18.40
   5   0   7  465.15   18.70
  -6   0  -7    5.30    4.40
  -6   0  -7   -1.50    5.00
  -6   0  -7    0.30    4.70
  -6   0  -7   -2.70    3.10
   6   0   7    2.80    4.10
   6   0   7    0.50    3.50
   6   0   7   -0.60    4.60
  -7   0  -7  547.25   24.10
  -7   0  -7  581.94   21.80
   7   0   7  619.94   22.50
   7   0   7  600.44   24.80
   7   0   7  585.84   21.80
  -8   0  -7   -2.10    3.60
  -8   0  -7   -0.70    5.10
   8   0   7   -3.30    3.70
   8   0   7    4.20    5.50
  -9   0  -7   44.30    9.40
  -9   0  -7   18.60    8.00
   9   0   7   20.40    5.50
 -10   0  -7    2.10    6.40
 -10   0  -7   12.20    7.00
  10   0   7   -8.80    3.40
 -11   0  -7  139.69   16.30
 -11   0  -7  119.79   15.50
  11   0   7  142.29   10.60
  10   0  -8  276.57   11.30
   9   0  -8   -2.70    3.00
   8   0  -8   13.70    4.40
  -8   0   8   23.50    4.40
   7   0  -8   -3.10    3.40
   7   0  -8   -0.30    2.90
  -7   0   8    2.70    3.10
  -7   0   8    0.80    2.50
  -7   0   8   -6.00    2.90
   6   0  -8    6.80    4.30
   6   0  -8    9.70    4.20
  -6   0   8    9.60    2.60
  -6   0   8    6.60    3.50
  -6   0   8   11.90    4.20
   5   0  -8   -2.20    3.10
   5   0  -8    3.30    4.10
  -5   0   8    0.30    2.70
  -5   0   8    0.40    3.50
   4   0  -8  804.52   20.10
   4   0  -8  805.12   26.50
   4   0  -8  829.62   26.80
  -4   0   8  816.62   23.00
  -4   0   8  827.12   26.60
   3   0  -8    0.60    1.70
   3   0  -8    1.10    1.90
   3   0  -8    1.90    3.60
   3   0  -8    3.20    3.60
   3   0  -8    0.60    2.50
  -3   0   8   -3.40    2.40
  -3   0   8    1.90    3.80
   2   0  -8  120.49    7.30
   2   0  -8  118.49    9.00
   2   0  -8  116.29    6.60
   2   0  -8  120.79    6.10
   2   0  -8  118.89    9.30
  -2   0   8  127.39    9.60
  -2   0   8  110.19    6.90
  -2   0   8  105.99    7.40
   1   0  -8    1.30    2.80
   1   0  -8   -4.10    3.50
   1   0  -8   -1.70    2.70
  -1   0   8    1.50    2.90
  -1   0   8   -0.90    3.80
  -1   0   8   -2.10    2.50
   0   0  -8  197.08    9.70
   0   0  -8  197.58   10.00
   0   0  -8  193.38   11.50
   0   0   8  189.18    9.60
   0   0   8  188.18    7.50
   0   0   8  180.68   11.10
   0   0   8  186.58    9.70
  -1   0  -8   -2.40    3.00
  -1   0  -8   -2.90    3.70
  -1   0  -8    5.20    3.80
   1   0   8   -2.30    2.80
   1   0   8    2.20    2.30
   1   0   8    8.10    3.60
   1   0   8    6.10    4.40
  -2   0  -8  442.36   18.60
  -2   0  -8  429.16   17.50
  -2   0  -8  448.26   15.80
  -2   0  -8  472.25   16.20
   2   0   8  447.66   15.90
   2   0   8  434.86   18.60
  -3   0  -8   -0.70    3.30
  -3   0  -8    0.70    4.40
  -3   0  -8   -1.10    4.40
  -3   0  -8    2.40    3.40
   3   0   8   -0.40    3.50
   3   0   8   -3.30    2.90
  -4   0  -8  114.09   10.80
  -4   0  -8  100.89    8.30
  -4   0  -8  103.89    9.00
  -4   0  -8  110.29    9.50
   4   0   8  115.09    9.70
   4   0   8  130.99   10.40
  -5   0  -8   -0.70    4.20
  -5   0  -8   -2.00    3.50
  -5   0  -8    0.30    5.00
  -5   0  -8   -0.60    4.10
   5   0   8    2.50    4.70
   5   0   8   -5.00    3.60
   5   0   8   -4.20    3.80
  -6   0  -8    8.20    5.00
  -6   0  -8   15.60    7.00
  -6   0  -8   11.00    4.20
  -6   0  -8    4.40    5.10
   6   0   8    4.80    5.40
   6   0   8    8.50    4.90
   6   0   8    8.60    5.10
  -7   0  -8    5.50    4.40
  -7   0  -8    2.50    5.50
   7   0   8   -8.30    4.10
   7   0   8    0.10    4.00
  -8   0  -8  202.38   12.90
  -8   0  -8  154.78   15.00
   8   0   8  212.58   15.60
   8   0   8  189.28   12.90
  -9   0  -8    0.00    5.60
  -9   0  -8    0.20    6.40
   9   0   8   -0.60    4.30
 -10   0  -8   11.00    7.50
 -10   0  -8   19.40    8.10
  10   0   8   12.10    5.20
 -11   0  -8    3.20    7.40
 -11   0  -8  -13.40    6.30
  11   0   8    6.50    5.00
  11   0  -9  198.08    9.40
  10   0  -9    0.70    3.50
   9   0  -9  533.05   19.70
   8   0  -9   -4.00    3.30
   7   0  -9   97.09    8.90
  -7   0   9   84.79    8.40
   6   0  -9   -3.80    4.00
   6   0  -9    0.70    3.80
  -6   0   9    2.00    3.20
  -6   0   9   -6.90    3.20
   5   0  -9   53.39    7.40
   5   0  -9   46.50    7.30
  -5   0   9   40.80    4.90
  -5   0   9   34.60    6.20
   4   0  -9    0.10    3.90
   4   0  -9   -1.10    1.30
   4   0  -9   -2.60    4.20
  -4   0   9   -0.90    2.70
  -4   0   9    0.60    4.10
   3   0  -9  229.18   13.40
   3   0  -9  227.08    8.40
   3   0  -9  230.68    8.40
   3   0  -9  248.68   13.50
   3   0  -9  229.08   10.10
  -3   0   9  213.68   12.90
  -3   0   9  219.78    9.90
   2   0  -9    5.10    3.40
   2   0  -9    4.30    2.40
   2   0  -9    0.50    2.70
   2   0  -9    0.90    4.60
  -2   0   9   -3.00    3.00
  -2   0   9   -2.30    4.40
  -2   0   9    3.20    2.90
   1   0  -9  116.19   10.70
   1   0  -9  119.59    8.20
   1   0  -9  112.39    8.10
  -1   0   9  113.69    9.80
  -1   0   9  126.09    8.00
  -1   0   9  131.39    8.80
   0   0  -9   -2.10    3.50
   0   0  -9   -2.70    3.90
   0   0  -9    2.80    3.40
   0   0   9    2.00    3.20
   0   0   9    4.30    4.30
   0   0   9    3.40    3.70
  -1   0  -9   33.40    5.50
  -1   0  -9   24.00    6.70
  -1   0  -9   32.50    5.80
   1   0   9   26.00    5.90
   1   0   9   43.70    5.20
  -2   0  -9   -5.10    3.90
  -2   0  -9    2.10    3.10
  -2   0  -9   -2.80    3.80
  -2   0  -9    2.90    4.70
   2   0   9    3.40    4.70
   2   0   9   -5.20    2.70
  -3   0  -9  437.46   17.00
  -3   0  -9  424.56   16.70
  -3   0  -9  444.56   19.10
  -3   0  -9  438.16   19.60
   3   0   9  420.16   19.20
   3   0   9  449.66   17.40
  -4   0  -9   -2.00    3.80
  -4   0  -9   -4.60    4.60
  -4   0  -9    1.60    5.10
  -4   0  -9   -2.70    3.90
   4   0   9    0.00    3.80
   4   0   9    6.30    4.90
  -5   0  -9  122.89    9.60
  -5   0  -9  115.69   10.30
  -5   0  -9  138.29   11.10
  -5   0  -9  138.49   12.60
   5   0   9  111.99   10.30
   5   0   9  135.29   11.40
  -6   0  -9   -4.20    4.30
  -6   0  -9    3.40    5.80
   6   0   9   -1.50    4.30
   6   0   9   -3.10    4.10
  -7   0  -9   -4.50    4.90
  -7   0  -9    4.00    4.70
   7   0   9    1.00    5.00
   7   0   9   -4.10    4.10
  -8   0  -9   -8.50    5.00
   8   0   9   -1.30    4.20
  -9   0  -9  348.97   21.20
  -9   0  -9  441.26   23.30
   9   0   9  381.16   19.10
 -10   0  -9  -13.90    6.20
 -10   0  -9    7.50    7.50
  10   0   9   -5.00    4.40
  11   0 -10    1.50    3.60
  10   0 -10   15.50    5.10
   9   0 -10    5.80    4.30
   8   0 -10  239.88   13.60
   7   0 -10    6.20    4.70
  -7   0  10   -2.60    3.70
   6   0 -10  267.07   14.70
  -6   0  10  259.77   14.20
   5   0 -10    3.90    4.70
   5   0 -10   -1.00    3.80
  -5   0  10   -1.00    2.90
  -5   0  10   -1.70    3.90
   4   0 -10    8.50    5.30
   4   0 -10    5.30    3.10
   4   0 -10    5.20    1.80
  -4   0  10    0.40    4.30
  -4   0  10    6.60    3.50
   3   0 -10    3.30    2.60
   3   0 -10   -2.10    4.70
   3   0 -10   -1.20    3.00
   3   0 -10   -1.90    1.90
  -3   0  10    0.50    3.00
  -3   0  10   -5.50    3.80
   2   0 -10   18.10    4.50
   2   0 -10   12.10    3.80
   2   0 -10   17.50    5.80
   2   0 -10   20.20    3.60
  -2   0  10   19.90    5.80
  -2   0  10   25.20    4.50
   1   0 -10    4.60    3.70
   1   0 -10    4.30    3.70
   1   0 -10    3.20    5.20
  -1   0  10   -0.60    3.30
  -1   0  10   -2.20    4.20
  -1   0  10    2.60    3.90
   0   0 -10  607.74   20.40
   0   0 -10  606.44   24.50
   0   0 -10  614.44   21.30
   0   0  10  586.84   20.60
   0   0  10  622.24   24.60
  -1   0 -10   -0.70    4.10
  -1   0 -10    6.00    5.10
  -1   0 -10    0.80    4.00
   1   0  10    5.80    5.40
  -2   0 -10  302.67   15.20
  -2   0 -10  292.47   14.10
  -2   0 -10  283.07   16.60
   2   0  10  296.57   12.90
   2   0  10  268.67   15.70
  -3   0 -10    2.40    4.00
  -3   0 -10    5.40    5.30
  -3   0 -10   -3.60    4.00
  -3   0 -10    4.00    5.20
   3   0  10   -1.80    3.40
   3   0  10    0.20    4.30
  -4   0 -10  235.28   13.10
  -4   0 -10  268.17   15.80
  -4   0 -10  267.57   15.80
  -4   0 -10  240.58   13.60
   4   0  10  241.08   13.70
   4   0  10  250.57   15.50
  -5   0 -10   -2.10    3.80
  -5   0 -10    6.20    5.60
  -5   0 -10   -3.80    3.60
  -5   0 -10    6.40    4.60
   5   0  10    0.20    4.70
   5   0  10   -6.60    3.80
  -6   0 -10  289.87   16.80
  -6   0 -10  301.47   18.40
   6   0  10  320.97   17.40
   6   0  10  273.87   16.70
  -7   0 -10   -3.20    4.70
  -7   0 -10    5.20    6.80
   7   0  10    3.40    4.90
  -8   0 -10    2.40    7.00
   8   0  10    2.40    5.30
  -9   0 -10    4.10    6.70
  -9   0 -10   -2.70    6.20
   9   0  10   -0.20    5.10
 -10   0 -10  339.07   23.20
 -10   0 -10  379.16   24.10
  10   0  10  396.16   20.20
  10   0 -11    0.00    4.00
   9   0 -11   25.90    6.40
   8   0 -11   -1.20    4.40
   7   0 -11  252.07   15.10
   6   0 -11    0.70    4.80
  -6   0  11   -3.10    4.60
   5   0 -11  431.66   19.90
  -5   0  11  369.66   18.30
   4   0 -11   -0.90    1.60
   4   0 -11    1.30    5.20
   4   0 -11    6.10    2.90
  -4   0  11    1.90    2.90
  -4   0  11   -0.30    4.40
   3   0 -11   42.90    4.60
   3   0 -11   28.50    4.90
   3   0 -11   47.70    8.20
   3   0 -11   34.00    4.80
  -3   0  11   35.80    7.60
  -3   0  11   44.60    6.20
   2   0 -11   -0.50    3.20
   2   0 -11    1.50    3.70
   2   0 -11   -1.50    4.40
   2   0 -11   -0.20    2.50
  -2   0  11   -3.80    3.10
  -2   0  11   -4.90    4.40
   1   0 -11  221.08   14.80
   1   0 -11  215.78   12.10
   1   0 -11  244.88   12.00
  -1   0  11  234.38   14.90
  -1   0  11  239.48   12.80
   0   0 -11   -2.60    5.50
   0   0 -11    9.20    4.40
   0   0 -11   -8.90    3.40
   0   0  11   -2.00    4.30
   0   0  11    2.60    5.60
  -1   0 -11  565.44   20.60
  -1   0 -11  591.74   24.80
  -1   0 -11  521.45   21.20
   1   0  11  588.64   24.40
  -2   0 -11   -6.90    4.20
  -2   0 -11   -7.20    4.30
  -2   0 -11    5.30    4.50
   2   0  11    4.20    5.40
  -3   0 -11   73.79    9.80
  -3   0 -11   81.19   10.90
  -3   0 -11   70.89    8.80
   3   0  11   58.59    9.90
  -4   0 -11    4.20    4.80
  -4   0 -11   -1.50    4.80
  -4   0 -11    3.70    5.60
  -4   0 -11   -5.50    3.90
   4   0  11    0.40    5.20
  -5   0 -11   -2.10    4.80
  -5   0 -11   -2.80    4.90
   5   0  11    5.60    5.40
  -6   0 -11   -0.50    6.40
  -6   0 -11    3.10    5.60
   6   0  11    3.40    5.80
  -7   0 -11  152.78   13.70
  -7   0 -11  191.88   16.50
   7   0  11  193.68   14.90
  -8   0 -11    5.70    7.10
   8   0  11    7.60    6.20
  -9   0 -11   -3.50    6.70
  -9   0 -11    2.70    7.70
   9   0  11    4.30    6.20
   9   0 -12   -4.90    4.60
   8   0 -12   29.50    7.30
   7   0 -12   -2.30    4.80
   6   0 -12   95.69   11.00
  -6   0  12   73.49   10.60
   5   0 -12    0.30    5.20
  -5   0  12   -0.30    5.10
   4   0 -12  324.57   13.50
   4   0 -12  343.57   18.70
  -4   0  12  344.07   18.40
   3   0 -12    1.20    3.20
   3   0 -12   -5.40    4.60
   3   0 -12   -0.20    2.70
  -3   0  12    2.50    5.10
   2   0 -12   93.29   10.80
   2   0 -12   95.69    8.40
   2   0 -12  100.19    7.80
  -2   0  12   90.89   11.10
   1   0 -12   -6.10    3.40
   1   0 -12   -3.90    4.50
   1   0 -12   -0.40    3.50
  -1   0  12    0.30    5.20
   0   0 -12    8.30    4.70
   0   0 -12    5.60    5.60
   0   0 -12    2.70    4.30
   0   0  12   13.40    5.90
  -1   0 -12   -5.90    3.90
  -1   0 -12   -1.60    3.90
  -1   0 -12    4.90    5.60
   1   0  12    6.70    6.00
  -2   0 -12  610.24   26.50
  -2   0 -12  554.84   23.00
  -2   0 -12  558.04   21.60
   2   0  12  594.14   26.00
  -3   0 -12    1.80    4.90
  -3   0 -12    4.10    4.50
  -3   0 -12   -4.10    4.80
   3   0  12    6.80    5.60
  -4   0 -12  216.98   15.40
  -4   0 -12  197.28   13.50
  -4   0 -12  187.28   15.40
   4   0  12  214.18   15.50
  -5   0 -12   13.60    6.90
  -5   0 -12    4.40    5.80
   5   0  12   -2.10    5.20
  -6   0 -12    1.20    6.30
  -6   0 -12   10.60    7.00
   6   0  12   10.20    6.60
  -7   0 -12    3.20    6.40
   7   0  12   -4.30    5.30
  -8   0 -12  284.57   20.30
  -8   0 -12  211.88   19.10
   8   0  12  279.67   19.00
   9   0 -13  135.19   13.10
   8   0 -13    3.00    5.40
   7   0 -13  110.79   12.60
   6   0 -13    0.70    5.90
   5   0 -13    6.50    6.30
  -5   0  13   -6.50    4.80
   4   0 -13    2.20    3.00
   4   0 -13   -3.40    4.50
  -4   0  13   -6.80    5.00
   3   0 -13   77.59   11.70
   3   0 -13  100.69    8.30
   3   0 -13   83.79    6.50
  -3   0  13   92.89   11.80
   2   0 -13   -0.30    3.90
   2   0 -13   -4.40    5.20
   2   0 -13    3.90    3.60
  -2   0  13    0.00    5.70
   1   0 -13  361.06   20.50
   1   0 -13  392.86   17.20
   1   0 -13  365.76   15.90
  -1   0  13  400.26   21.50
   0   0 -13   -4.50    5.50
   0   0 -13   -3.60    3.90
   0   0 -13   -0.30    4.30
   0   0  13   -2.40    5.10
  -1   0 -13   23.30    6.10
  -1   0 -13   21.50    6.30
  -1   0 -13   10.90    6.80
   1   0  13   18.20    7.30
  -2   0 -13   -1.40    5.00
  -2   0 -13    3.20    5.90
  -2   0 -13   -2.10    4.20
   2   0  13    3.30    6.00
  -3   0 -13  195.08   13.40
  -3   0 -13  213.28   16.90
  -3   0 -13  174.58   13.80
   3   0  13  202.38   16.60
  -4   0 -13   -2.00    4.50
  -4   0 -13    2.50    5.40
  -4   0 -13    6.40    6.60
   4   0  13   -3.60    5.90
  -5   0 -13  122.69   12.90
  -5   0 -13  117.79   14.20
   5   0  13  157.78   15.10
  -6   0 -13   -5.40    6.40
  -6   0 -13    0.00    6.20
   6   0  13    3.50    6.50
  -7   0 -13   23.80    9.20
  -7   0 -13   32.20    9.60
   7   0  13   51.19   10.30
   8   0 -14   44.60    9.20
   7   0 -14    1.00    6.50
   6   0 -14  118.99   13.30
   5   0 -14   -5.50    5.60
  -5   0  14    3.10    6.00
   4   0 -14   44.80    9.80
  -4   0  14   40.10    9.10
   3   0 -14   -1.50    3.70
   3   0 -14    0.70    2.80
   3   0 -14   -3.20    5.70
  -3   0  14   -5.90    5.30
   2   0 -14   46.70    7.10
   2   0 -14   32.80    5.40
   2   0 -14   28.30    8.10
  -2   0  14   55.79   10.50
   1   0 -14   -0.60    3.80
   1   0 -14   -1.00    4.50
   1   0 -14    1.40    6.60
  -1   0  14   -4.30    5.40
   0   0 -14    6.90    7.40
   0   0 -14   16.60    5.70
   0   0 -14   19.30    6.00
   0   0  14    7.60    6.80
  -1   0 -14    0.00    6.70
  -1   0 -14   -0.40    4.30
  -1   0 -14   -3.20    4.60
   1   0  14    9.10    7.10
  -2   0 -14    2.40    7.10
  -2   0 -14   -1.30    5.30
  -2   0 -14    6.20    5.30
   2   0  14    2.50    5.40
  -3   0 -14   -1.00    4.90
  -3   0 -14    7.50    6.50
  -3   0 -14   -4.60    5.00
   3   0  14    3.20    6.20
  -4   0 -14   21.00    8.20
  -4   0 -14   13.40    6.80
   4   0  14   24.50    8.20
  -5   0 -14    4.60    6.10
  -5   0 -14  -10.40    5.10
   5   0  14  -13.30    4.70
  -6   0 -14  100.99   14.10
  -6   0 -14  110.29   14.10
   6   0  14   94.39   13.00
   6   0 -15   -2.50    6.20
   5   0 -15  199.18   17.00
   4   0 -15    0.10    6.10
  -4   0  15   -4.70    5.80
   3   0 -15   76.79    6.60
   3   0 -15   98.79   13.50
  -3   0  15   78.59   12.20
   2   0 -15   -0.50    4.00
   2   0 -15   -0.60    5.80
   2   0 -15   -0.10    3.40
  -2   0  15   -2.20    6.10
   1   0 -15   -1.70    6.40
   1   0 -15   -0.10    4.30
   1   0 -15    2.80    4.30
  -1   0  15    2.50    6.00
   0   0 -15    1.00    6.50
   0   0 -15    1.20    5.30
   0   0 -15    0.40    4.50
   0   0  15    3.90    6.10
  -1   0 -15  357.36   18.90
  -1   0 -15  333.47   22.40
  -1   0 -15  368.26   18.20
   1   0  15  357.66   22.20
  -2   0 -15   11.10    7.30
  -2   0 -15    9.00    5.80
  -2   0 -15   -4.40    4.60
   2   0  15    1.40    6.90
  -3   0 -15   98.09   11.50
  -3   0 -15  103.29   13.00
  -3   0 -15   91.99   14.40
   3   0  15   89.89   13.90
  -4   0 -15   -3.70    6.20
  -4   0 -15    9.20    8.20
   4   0  15    0.00    7.30
  -5   0 -15   -7.00    6.50
  -5   0 -15    1.60    6.70
   5   0  15   -5.40    6.20
   4   0 -16  234.78   18.60
  -4   0  16  247.28   19.50
   3   0 -16   -7.70    6.80
   3   0 -16    2.60    2.90
  -3   0  16   -7.50    6.70
   2   0 -16  268.97   20.70
   2   0 -16  242.78   12.70
  -2   0  16  267.57   19.60
   1   0 -16   -1.70    6.10
   1   0 -16   -7.50    3.80
  -1   0  16   -0.50    7.60
   0   0 -16   22.00    7.60
   0   0 -16   48.20   11.40
   0   0 -16   23.60    6.30
   0   0  16   15.70    8.80
  -1   0 -16    5.30    6.20
  -1   0 -16    1.10    7.00
  -1   0 -16    6.20    5.50
   1   0  16   -3.10    7.00
  -2   0 -16   91.99   12.40
  -2   0 -16   84.99   14.40
  -2   0 -16  100.39   12.10
   2   0  16   76.79   13.00
   2   1  16   16.60    8.10
  -2  -1 -16   11.20    9.20
  -2  -1 -16   23.40    7.20
  -2  -1 -16   40.20    8.00
  -2  -1 -16   17.90    7.20
   1   1  16  106.39   15.40
  -1  -1 -16   90.99   11.20
  -1  -1 -16   87.39   14.30
  -1  -1 -16  101.79   11.40
  -1  -1 -16   93.49   11.50
   0   1  16  131.39   16.40
   0  -1 -16  108.69   15.70
   0  -1 -16  117.89   11.80
   0  -1 -16  121.39   11.50
  -1   1  16   54.09   11.90
   1  -1 -16   56.09   11.30
   1  -1 -16   43.90    7.30
  -2   1  16   -0.50    6.90
   2  -1 -16   -1.60    7.00
   2  -1 -16   -3.10    3.60
  -3   1  16   20.80    8.60
   3  -1 -16   18.40    3.70
   3  -1 -16   20.00    8.90
  -4   1  16    8.70    7.10
   4  -1 -16   -0.80    6.80
   5   1  15   57.19   11.70
  -5  -1 -15   35.90   10.10
  -5  -1 -15   43.00    9.70
  -5  -1 -15   37.30   10.50
   4   1  15   49.99   11.40
  -4  -1 -15   25.70    9.90
  -4  -1 -15   39.90    9.60
  -4  -1 -15   44.00    9.40
   3   1  15   21.00    8.70
  -3  -1 -15   20.40    8.40
  -3  -1 -15   11.30    5.80
  -3  -1 -15   23.30    7.90
   2   1  15   84.89   13.10
  -2  -1 -15   98.19   11.30
  -2  -1 -15   88.09   11.00
  -2  -1 -15  105.79   15.00
   1   1  15    4.40    6.80
  -1  -1 -15   16.60    7.90
  -1  -1 -15    0.80    4.90
  -1  -1 -15   -5.50    4.90
   0   1  15  107.39   13.30
   0  -1 -15  106.49   10.50
   0  -1 -15   89.79   10.60
   0  -1 -15  125.99   15.40
  -1   1  15  131.69   15.00
   1  -1 -15   98.89   14.40
   1  -1 -15  120.79   10.30
   1  -1 -15   98.59    9.30
   1  -1 -15  110.69   10.60
  -2   1  15   47.90   10.60
   2  -1 -15   58.79    8.60
   2  -1 -15   57.59   11.50
   2  -1 -15   53.79    7.20
  -3   1  15   -6.60    5.90
   3  -1 -15    1.10    2.80
   3  -1 -15   -3.80    5.80
  -4   1  15   10.20    7.00
   4  -1 -15   17.50    8.10
   5  -1 -15   11.20    7.70
   6  -1 -15    4.10    6.20
   6   1  14   38.20   10.70
  -6  -1 -14   20.90    9.00
  -6  -1 -14   37.60   10.10
  -6  -1 -14   30.10    8.90
   5   1  14   48.90   10.20
  -5  -1 -14   39.60    8.90
  -5  -1 -14   43.50    9.40
  -5  -1 -14   36.10   10.10
   4   1  14  155.98   16.00
  -4  -1 -14  162.58   14.30
  -4  -1 -14  103.79   14.50
   3   1  14   73.39   12.50
  -3  -1 -14   77.69   10.60
  -3  -1 -14   83.79   13.00
  -3  -1 -14   75.89   11.00
   2   1  14   58.49   10.90
  -2  -1 -14   64.39    8.90
  -2  -1 -14   58.69    9.60
  -2  -1 -14   44.10    9.70
   1   1  14  112.99   13.10
  -1  -1 -14   96.09   10.10
  -1  -1 -14   88.19   10.10
  -1  -1 -14   92.39   12.70
   0   1  14   24.00    7.90
   0  -1 -14   19.70    7.50
   0  -1 -14   19.90    6.00
   0  -1 -14   28.90    6.70
  -1   1  14   43.10    9.30
   1  -1 -14   59.49    8.50
   1  -1 -14   76.79   11.50
   1  -1 -14   60.09    8.20
  -2   1  14  184.78   15.10
   2  -1 -14  175.98    9.90
   2  -1 -14  170.98   11.20
   2  -1 -14  153.58    9.90
   2  -1 -14  175.68   16.00
  -3   1  14  160.78   14.90
   3  -1 -14  155.68    9.90
   3  -1 -14  136.99   14.50
   3  -1 -14  140.39    8.00
  -4   1  14  112.19   13.10
   4  -1 -14  101.29   13.00
  -5   1  14  103.09   12.60
   5  -1 -14   87.89   12.40
   6  -1 -14   14.10    7.00
   7  -1 -14   16.70    7.00
   7   1  13  100.79   13.30
  -7  -1 -13  111.59   14.70
  -7  -1 -13   86.39   12.80
   6   1  13   52.99   10.10
  -6  -1 -13   35.10    9.60
  -6  -1 -13   37.70    9.20
  -6  -1 -13   15.30    7.30
   5   1  13   12.60    7.10
  -5  -1 -13   -1.70    5.40
  -5  -1 -13    9.70    6.70
   4   1  13    0.30    6.00
  -4  -1 -13    6.10    6.20
  -4  -1 -13   11.50    6.40
  -4  -1 -13    3.80    5.00
   3   1  13   -0.40    5.70
  -3  -1 -13    5.20    5.10
  -3  -1 -13   14.30    6.10
  -3  -1 -13   10.10    6.70
   2   1  13   63.59   11.00
  -2  -1 -13   73.99   10.00
  -2  -1 -13   66.89   10.70
  -2  -1 -13   68.99    9.60
   1   1  13   73.19   11.20
  -1  -1 -13   95.09   13.00
  -1  -1 -13  100.19    9.90
  -1  -1 -13   89.69   10.10
   0   1  13    1.00    5.80
   0  -1 -13   15.30    7.30
   0  -1 -13   11.70    5.20
   0  -1 -13    6.80    4.90
  -1   1  13    6.60    6.60
   1  -1 -13   10.80    6.70
   1  -1 -13    1.50    3.90
   1  -1 -13    5.20    4.50
  -2   1  13   -7.50    4.70
   2  -1 -13    4.70    3.70
   2  -1 -13    8.20    6.20
   2  -1 -13    6.20    4.20
  -3   1  13   25.10    7.90
   3  -1 -13   16.20    4.40
   3  -1 -13   20.80    3.70
   3  -1 -13   15.60    7.50
   3  -1 -13   19.90    3.80
  -4   1  13   89.19   11.80
   4  -1 -13   98.99   11.40
   4  -1 -13   91.39    7.20
  -5   1  13  180.28   14.50
   5  -1 -13  193.78   15.10
   6  -1 -13   62.09   10.10
   7  -1 -13   15.20    6.80
   8  -1 -13   14.70    6.60
   9  -1 -13   21.50    7.20
   8   1  12   -6.20    5.30
  -8  -1 -12    6.60    7.60
  -8  -1 -12    6.50    7.10
   7   1  12   29.60    8.50
  -7  -1 -12   13.00    7.30
  -7  -1 -12   19.50    8.30
   6   1  12   81.29   12.10
  -6  -1 -12  131.99   14.20
  -6  -1 -12  118.09   13.20
   5   1  12  190.28   15.30
  -5  -1 -12  174.18   14.80
  -5  -1 -12  201.58   15.80
   4   1  12    5.80    5.30
  -4  -1 -12   -0.30    4.90
  -4  -1 -12   -0.70    5.60
  -4  -1 -12    4.40    6.30
   3   1  12   41.50    8.70
  -3  -1 -12   27.90    6.40
  -3  -1 -12   35.50    8.20
  -3  -1 -12   24.10    6.90
   2   1  12   10.40    6.00
  -2  -1 -12    7.90    4.70
  -2  -1 -12   -9.70    4.90
  -2  -1 -12    1.20    4.40
   1   1  12  339.17   19.50
  -1  -1 -12  354.86   16.90
  -1  -1 -12  344.07   19.60
  -1  -1 -12  343.57   15.80
   0   1  12   35.10    7.80
   0  -1 -12   29.30    5.90
   0  -1 -12   21.50    7.40
   0  -1 -12   22.30    5.50
  -1   1  12    6.20    5.40
   1  -1 -12    0.80    3.90
   1  -1 -12    3.80    6.00
   1  -1 -12    7.60    4.20
  -2   1  12   18.00    6.60
   2  -1 -12   11.50    4.10
   2  -1 -12   19.20    6.80
   2  -1 -12   11.20    4.00
  -3   1  12   77.49   10.60
   3  -1 -12   94.99    7.50
   3  -1 -12   70.79   10.60
   3  -1 -12   80.69    6.00
  -4   1  12   21.80    6.60
   4  -1 -12   18.00    6.80
   4  -1 -12   23.60    4.20
  -5   1  12   27.60    6.80
   5  -1 -12   37.60    7.80
  -6   1  12  108.19   11.20
   6  -1 -12  130.69   12.10
   7  -1 -12   89.99   10.80
   8  -1 -12    2.70    5.30
   9  -1 -12   33.70    7.40
   9   1  11   24.40    7.50
  -9  -1 -11   50.89   10.60
  -9  -1 -11   28.20    9.80
   8   1  11   13.80    6.90
  -8  -1 -11   -4.40    6.40
  -8  -1 -11   -0.50    6.00
   7   1  11   40.40    8.90
  -7  -1 -11   22.70    8.50
  -7  -1 -11   25.20    7.50
   6   1  11  104.89   11.10
   6   1  11   89.09   10.80
  -6  -1 -11   82.99   10.60
  -6  -1 -11   85.89   12.40
   5   1  11  159.48   13.60
   5   1  11  160.68   12.30
  -5  -1 -11  182.08   14.80
  -5  -1 -11  164.98   13.70
   4   1  11  269.17   14.90
   4   1  11  294.67   17.50
  -4  -1 -11  269.47   16.40
  -4  -1 -11  320.07   15.30
  -4  -1 -11  286.77   17.50
   3   1  11  224.48   12.80
   3   1  11  226.08   15.00
  -3  -1 -11  241.78   13.30
  -3  -1 -11  243.58   14.80
  -3  -1 -11  232.78   15.30
   2   1  11  112.49   11.20
   2   1  11  118.29    8.50
  -2  -1 -11  103.99   10.30
  -2  -1 -11  115.89   12.40
  -2  -1 -11  102.29    9.70
   1   1  11   10.70    6.00
  -1  -1 -11    5.90    4.50
  -1  -1 -11    3.10    4.50
  -1  -1 -11    1.30    5.30
   0   1  11  369.46   19.00
   0   1  11  366.06   15.90
   0  -1 -11  373.16   16.10
   0  -1 -11  365.96   15.50
   0  -1 -11  378.66   19.20
  -1   1  11   68.29    8.20
  -1   1  11   52.79    9.00
   1  -1 -11   79.69   10.10
   1  -1 -11   57.49    7.30
   1  -1 -11   54.99    7.50
  -2   1  11   77.49    7.10
  -2   1  11   69.89    9.50
   2  -1 -11   59.89    7.10
   2  -1 -11   77.99    6.00
   2  -1 -11   78.19   10.60
   2  -1 -11   77.29    7.00
  -3   1  11    3.20    5.00
  -3   1  11    9.80    3.40
   3  -1 -11   -0.40    5.00
   3  -1 -11    4.80    3.10
   3  -1 -11    6.90    2.70
   3  -1 -11    3.00    2.30
  -4   1  11   67.39    9.30
  -4   1  11   70.49    6.30
   4  -1 -11   85.09   10.20
   4  -1 -11   79.99    3.90
   4  -1 -11   78.79    3.90
   4  -1 -11   73.49    6.20
  -5   1  11   28.60    7.00
   5  -1 -11   36.70    7.40
  -6   1  11    5.80    4.80
   6  -1 -11   10.50    5.40
   7  -1 -11    3.20    4.90
   8  -1 -11    3.00    4.90
   9  -1 -11   46.40    7.70
  10  -1 -11   44.10    7.30
  10   1  10   49.00    9.00
 -10  -1 -10   62.59   12.80
 -10  -1 -10   52.49   10.80
   9   1  10  103.49   11.90
  -9  -1 -10  123.29   15.00
  -9  -1 -10   92.59   12.60
   8   1  10   36.40    7.90
  -8  -1 -10   24.90    8.60
  -8  -1 -10   31.20    9.10
   7   1  10   27.10    7.30
   7   1  10   40.60    8.10
  -7  -1 -10   40.80    7.80
  -7  -1 -10   42.10    9.50
   6   1  10   -1.00    4.90
   6   1  10   12.10    6.20
  -6  -1 -10   24.60    7.80
  -6  -1 -10   10.80    5.90
   5   1  10   18.80    6.60
   5   1  10    5.90    5.20
  -5  -1 -10    5.90    4.70
  -5  -1 -10   10.70    6.30
  -5  -1 -10   15.70    6.00
  -5  -1 -10    8.00    5.00
   4   1  10    1.40    4.80
   4   1  10    3.40    4.40
  -4  -1 -10    9.40    5.90
  -4  -1 -10    9.90    5.80
  -4  -1 -10    7.40    4.60
  -4  -1 -10    7.70    4.80
   3   1  10   37.90    7.40
   3   1  10   23.40    5.40
  -3  -1 -10   45.10    7.60
  -3  -1 -10   33.30    6.40
  -3  -1 -10   21.40    6.80
   2   1  10  152.48   11.90
   2   1  10  157.08    9.60
  -2  -1 -10  123.59   12.30
  -2  -1 -10  157.58   11.50
  -2  -1 -10  159.28   10.80
   1   1  10  137.19   11.90
   1   1  10  141.79    8.10
  -1  -1 -10  140.19   10.30
  -1  -1 -10  141.69   11.80
  -1  -1 -10  130.29    9.90
   0   1  10  136.29    6.90
   0   1  10  149.88   12.10
   0   1  10  129.49    9.60
   0   1  10  144.49    9.50
   0  -1 -10  141.19    9.80
   0  -1 -10  137.09   11.60
   0  -1 -10  157.18    9.80
  -1   1  10   68.39    6.90
  -1   1  10   84.39    8.50
  -1   1  10   73.69    9.10
   1  -1 -10   75.69    7.70
   1  -1 -10   94.19   10.80
   1  -1 -10   84.09    7.60
  -2   1  10  105.69    7.30
  -2   1  10  104.99   10.00
   2  -1 -10   86.89    9.70
   2  -1 -10   96.99    7.40
   2  -1 -10  101.09    7.30
  -3   1  10   46.40    5.70
  -3   1  10   36.70    7.00
   3  -1 -10   42.90    4.70
   3  -1 -10   33.30    4.80
   3  -1 -10   39.50    4.10
   3  -1 -10   44.60    8.10
  -4   1  10  339.47   16.60
  -4   1  10  323.17   12.20
   4  -1 -10  358.96   17.30
   4  -1 -10  325.87    9.20
  -5   1  10   29.10    4.10
  -5   1  10   19.30    5.70
   5  -1 -10   18.10    5.90
   5  -1 -10   28.40    6.10
  -6   1  10   16.50    5.20
   6  -1 -10   10.80    5.00
  -7   1  10  260.67   13.80
   7  -1 -10  231.08   13.60
   8  -1 -10   61.49    8.50
   9  -1 -10    4.90    4.60
  10  -1 -10  126.79    9.50
  11  -1 -10  168.38    9.80
  10   1   9   89.69   10.90
 -10  -1  -9  106.59   14.70
 -10  -1  -9  114.39   15.00
   9   1   9    6.50    5.10
  -9  -1  -9    3.90    6.70
  -9  -1  -9    8.80    6.20
   8   1   9   62.39    9.30
   8   1   9   50.39    9.10
  -8  -1  -9   49.00    9.80
  -8  -1  -9   65.59   10.50
   7   1   9   89.19   10.10
   7   1   9   88.29   11.50
  -7  -1  -9   82.59   10.10
  -7  -1  -9   91.19   12.20
   6   1   9  128.29   11.70
   6   1   9  148.59   11.70
  -6  -1  -9  126.69   11.90
  -6  -1  -9  156.88   12.10
   5   1   9   38.30    7.10
   5   1   9   25.70    6.20
  -5  -1  -9   45.10    7.90
  -5  -1  -9   36.30    6.80
  -5  -1  -9   55.49    7.10
  -5  -1  -9   25.00    7.00
   4   1   9    9.00    4.70
   4   1   9    9.40    5.50
  -4  -1  -9   10.30    5.10
  -4  -1  -9   15.20    5.80
  -4  -1  -9    5.70    4.60
  -4  -1  -9    6.10    4.50
   3   1   9   34.40    6.50
   3   1   9   33.40    5.70
  -3  -1  -9   34.70    6.20
  -3  -1  -9   49.40    7.90
  -3  -1  -9   34.90    5.80
  -3  -1  -9   31.90    6.40
   2   1   9   21.40    5.60
   2   1   9   24.10    4.60
  -2  -1  -9   29.10    6.30
  -2  -1  -9   20.60    5.00
  -2  -1  -9   20.10    6.50
   1   1   9  103.69   10.30
   1   1   9  118.99    7.40
   1   1   9  122.79    9.60
  -1  -1  -9  128.09   10.50
  -1  -1  -9  130.89    9.30
  -1  -1  -9  110.79    8.70
   0   1   9  253.67   14.30
   0   1   9  227.68   11.40
   0   1   9  248.88   11.50
   0   1   9  241.08    9.10
   0  -1  -9  235.78   11.70
   0  -1  -9  232.08   11.30
   0  -1  -9  264.67   14.60
  -1   1   9  241.08   11.40
  -1   1   9  243.58   13.70
  -1   1   9  234.28   10.70
   1  -1  -9  237.48   11.10
   1  -1  -9  225.08   10.60
   1  -1  -9  234.18   13.50
  -2   1   9  185.68    9.10
  -2   1   9  204.78   12.30
   2  -1  -9  218.38    9.30
   2  -1  -9  170.98   11.70
   2  -1  -9  210.38    9.60
  -3   1   9    4.20    4.70
  -3   1   9    8.10    3.10
   3  -1  -9    5.10    4.50
   3  -1  -9    5.70    2.80
   3  -1  -9   13.00    5.30
   3  -1  -9    2.50    1.90
   3  -1  -9    6.90    2.50
  -4   1   9  174.88   11.40
  -4   1   9  182.88    8.40
   4  -1  -9  174.38   11.90
   4  -1  -9  188.38   11.70
  -5   1   9   85.69    6.10
  -5   1   9   83.19    8.90
   5  -1  -9   88.89    9.00
   5  -1  -9   92.29    9.20
  -6   1   9   51.49    7.20
  -6   1   9   59.69    5.70
   6  -1  -9   39.90    6.70
   6  -1  -9   64.09    7.40
  -7   1   9   58.49    7.20
  -7   1   9   48.50    4.90
   7  -1  -9   54.69    7.50
   8  -1  -9    6.30    4.20
   9  -1  -9   -0.80    3.50
  10  -1  -9   41.80    5.70
  11  -1  -9   42.40    5.30
  11   1   8   49.99    7.90
 -11  -1  -8   46.90   12.30
 -11  -1  -8   50.69   11.40
  10   1   8   96.09    9.90
 -10  -1  -8   83.89   13.10
 -10  -1  -8   93.69   13.40
   9   1   8    6.70    6.20
   9   1   8    9.40    5.00
  -9  -1  -8   12.10    7.50
  -9  -1  -8   10.00    6.70
   8   1   8   50.39    8.00
   8   1   8   38.60    8.90
  -8  -1  -8   46.80    9.30
  -8  -1  -8   67.29    8.50
  -8  -1  -8   53.99    9.80
   7   1   8  112.39   11.90
   7   1   8  105.99    9.90
  -7  -1  -8  125.19   10.20
  -7  -1  -8  121.09   12.70
   6   1   8  436.96   18.90
   6   1   8  434.46   19.00
   6   1   8  420.16   19.80
  -6  -1  -8  457.25   19.10
  -6  -1  -8  414.56   20.60
  -6  -1  -8  426.96   19.60
  -6  -1  -8  422.96   16.30
   5   1   8  302.47   15.50
   5   1   8  284.97   14.90
   5   1   8  301.27   15.40
  -5  -1  -8  329.47   15.80
  -5  -1  -8  285.87   15.80
  -5  -1  -8  272.37   12.90
  -5  -1  -8  312.67   15.50
   4   1   8  121.69   10.00
   4   1   8  133.29   10.80
  -4  -1  -8  141.19   10.80
  -4  -1  -8  106.99    9.90
  -4  -1  -8  137.79   10.00
  -4  -1  -8  119.59    8.70
   3   1   8   28.40    5.00
   3   1   8   27.50    6.00
  -3  -1  -8   22.40    5.70
  -3  -1  -8   28.90    5.30
  -3  -1  -8   25.60    5.00
  -3  -1  -8   39.10    6.80
   2   1   8   60.89    6.30
   2   1   8   50.69    7.60
  -2  -1  -8   49.00    6.60
  -2  -1  -8   59.59    8.10
  -2  -1  -8   65.29    7.90
  -2  -1  -8   58.19    6.20
   1   1   8  453.85   18.70
   1   1   8  436.46   14.60
   1   1   8  454.15   16.20
  -1  -1  -8  429.46   18.10
  -1  -1  -8  415.56   15.50
  -1  -1  -8  451.15   16.60
   0   1   8  254.27    9.20
   0   1   8  262.27   11.40
   0   1   8  269.57   11.30
   0   1   8  267.97   13.80
   0  -1  -8  266.87   11.60
   0  -1  -8  268.97   11.40
   0  -1  -8  254.97   13.80
  -1   1   8   26.30    2.70
  -1   1   8   22.00    5.10
  -1   1   8   26.00    4.50
  -1   1   8   35.30    5.00
   1  -1  -8   22.60    4.00
   1  -1  -8   27.40    6.00
   1  -1  -8   30.90    4.50
  -2   1   8  361.46   13.40
  -2   1   8  386.26   12.80
  -2   1   8  337.57   15.50
   2  -1  -8  380.96   13.00
   2  -1  -8  379.96   16.10
   2  -1  -8  379.16   16.30
   2  -1  -8  368.36   12.30
  -3   1   8  230.58   12.10
  -3   1   8  230.88    9.30
   3  -1  -8  239.28   12.40
   3  -1  -8  230.78    7.70
   3  -1  -8  235.98    9.40
   3  -1  -8  240.98    7.70
   3  -1  -8  252.77   12.90
  -4   1   8   28.00    5.30
  -4   1   8   32.70    4.30
   4  -1  -8   36.00    6.10
   4  -1  -8   42.10    6.60
  -5   1   8   17.60    2.30
  -5   1   8   20.10    3.50
  -5   1   8   18.40    4.80
   5  -1  -8   28.50    5.40
   5  -1  -8   16.80    4.90
  -6   1   8   22.80    5.00
  -6   1   8   22.40    3.90
  -6   1   8   19.60    3.20
   6  -1  -8   21.70    4.80
   6  -1  -8   18.30    5.10
  -7   1   8    8.60    3.80
  -7   1   8   -4.10    2.50
  -7   1   8    9.40    3.20
   7  -1  -8    1.50    3.10
   7  -1  -8    7.20    4.00
  -8   1   8   80.49    7.30
   8  -1  -8   82.59    7.50
   9  -1  -8  152.68    8.90
  10  -1  -8   45.20    5.40
  11   1   7   20.50    5.70
 -11  -1  -7   10.10    7.70
 -11  -1  -7   14.20    8.80
  10   1   7   27.80    5.90
 -10  -1  -7    6.00    6.50
 -10  -1  -7   28.10    9.10
   9   1   7   80.89   11.80
   9   1   7   87.79    9.30
  -9  -1  -7   60.59   10.70
  -9  -1  -7   88.79   11.60
   8   1   7   44.10    8.30
   8   1   7   46.00    6.90
  -8  -1  -7   65.69   10.30
  -8  -1  -7   37.40    6.40
  -8  -1  -7   32.80    7.50
   7   1   7    8.10    5.30
   7   1   7   20.50    5.20
   7   1   7   13.30    4.70
  -7  -1  -7   19.60    5.50
  -7  -1  -7   13.70    6.40
   6   1   7    1.50    4.10
   6   1   7   -1.10    4.30
   6   1   7    9.70    4.50
  -6  -1  -7   -4.10    3.90
  -6  -1  -7    6.70    5.40
  -6  -1  -7    1.20    5.40
   5   1   7    7.70    4.50
   5   1   7   13.30    4.60
   5   1   7   14.30    4.60
  -5  -1  -7    6.50    3.50
  -5  -1  -7   11.00    4.80
  -5  -1  -7   10.30    4.70
  -5  -1  -7    4.20    5.00
   4   1   7   94.89    8.80
   4   1   7  109.39    9.30
   4   1   7   98.69    8.70
  -4  -1  -7   97.89    8.80
  -4  -1  -7   90.09    9.60
  -4  -1  -7  100.49    7.40
  -4  -1  -7   90.29    8.60
   3   1   7  370.26   16.20
   3   1   7  356.76   14.50
   3   1   7  385.86   16.00
  -3  -1  -7  355.76   14.60
  -3  -1  -7  382.96   13.70
  -3  -1  -7  358.96   15.70
  -3  -1  -7  372.66   15.80
   2   1   7  132.19    9.40
   2   1   7  151.08    8.30
   2   1   7  149.88    9.50
  -2  -1  -7  139.99    9.20
  -2  -1  -7  142.09    8.20
  -2  -1  -7  137.99    9.50
  -2  -1  -7  159.18    8.50
   1   1   7   54.29    5.00
   1   1   7   49.00    6.20
   1   1   7   50.19    5.60
   1   1   7   33.80    5.60
  -1  -1  -7   51.39    5.80
  -1  -1  -7   48.60    7.20
  -1  -1  -7   43.50    5.90
   0   1   7    3.40    3.80
   0   1   7    6.60    2.10
   0   1   7    6.40    2.80
   0   1   7    8.80    3.20
   0  -1  -7   10.80    3.40
   0  -1  -7    5.70    3.10
   0  -1  -7    7.70    4.10
   0  -1  -7    6.30    3.60
  -1   1   7    8.80    1.70
  -1   1   7   17.30    3.70
  -1   1   7   19.30    4.80
  -1   1   7   14.50    3.20
   1  -1  -7   12.10    3.00
   1  -1  -7   15.00    4.70
   1  -1  -7   10.70    3.10
   1  -1  -7   18.40    4.40
  -2   1   7   97.79    7.60
  -2   1   7   98.79    5.70
  -2   1   7  104.99    6.60
   2  -1  -7   97.79    5.90
   2  -1  -7  105.89    8.10
   2  -1  -7  103.79    5.70
   2  -1  -7  109.49    8.40
  -3   1   7  526.85   15.40
  -3   1   7  511.55   18.60
   3  -1  -7  534.05   15.50
   3  -1  -7  532.25   12.90
   3  -1  -7  514.45   18.40
   3  -1  -7  537.85   13.70
   3  -1  -7  514.65   18.80
  -4   1   7  220.28    7.00
  -4   1   7  204.98   10.70
  -4   1   7  233.68    8.60
   4  -1  -7  221.38   11.20
   4  -1  -7  225.48   11.20
  -5   1   7  316.77   13.30
  -5   1   7  331.27   10.70
  -5   1   7  316.07   11.20
   5  -1  -7  333.67   14.00
   5  -1  -7  342.67   13.90
  -6   1   7  194.58   10.10
  -6   1   7  191.08    8.70
  -6   1   7  193.28    8.70
   6  -1  -7  175.78   10.10
   6  -1  -7  203.08   10.10
  -7   1   7  168.68    9.20
  -7   1   7  176.58    8.80
  -7   1   7  189.18    9.40
   7  -1  -7  176.28    9.70
   7  -1  -7  164.58    9.20
  -8   1   7   17.90    3.80
  -8   1   7   12.50    4.00
  -8   1   7   19.30    2.80
  -8   1   7   16.50    4.50
   8  -1  -7   15.70    4.00
  -9   1   7  210.18   12.00
   9  -1  -7  204.58    9.20
  10  -1  -7  226.18    8.30
  12   1   6   -1.00    3.40
 -12  -1  -6    9.60    7.30
 -12  -1  -6   13.30    8.80
  11   1   6    2.20    3.70
 -11  -1  -6    9.50    6.80
 -11  -1  -6   10.10    7.70
  10   1   6   -2.30    3.40
  10   1   6   -2.60    5.50
 -10  -1  -6   -1.90    6.10
 -10  -1  -6    4.70    6.70
   9   1   6  152.58   10.50
   9   1   6  171.38   14.90
  -9  -1  -6  172.48   14.80
  -9  -1  -6  159.38   14.30
   8   1   6  155.48   13.60
   8   1   6  185.38   10.70
   8   1   6  159.68   10.40
  -8  -1  -6  151.18   13.40
  -8  -1  -6  149.09   10.00
  -8  -1  -6  169.28   14.00
   7   1   6   43.90    7.50
   7   1   6   60.09    7.30
   7   1   6   67.79    7.40
  -7  -1  -6   62.79    7.50
  -7  -1  -6   73.29   10.00
   6   1   6   38.80    6.40
   6   1   6   47.70    7.90
   6   1   6   45.90    6.50
  -6  -1  -6   31.00    5.50
  -6  -1  -6   38.10    7.00
  -6  -1  -6   43.40    7.40
   5   1   6   50.09    7.20
   5   1   6   32.70    5.80
   5   1   6   55.59    6.90
  -5  -1  -6   37.30    7.50
  -5  -1  -6   30.90    5.40
  -5  -1  -6   45.90    6.50
   4   1   6   10.30    4.20
   4   1   6   10.00    4.10
   4   1   6   14.20    4.20
  -4  -1  -6   10.40    4.80
  -4  -1  -6   17.70    4.70
  -4  -1  -6   17.50    4.20
  -4  -1  -6   10.20    3.30
   3   1   6   48.10    6.00
   3   1   6   54.69    6.30
   3   1   6   58.79    6.60
  -3  -1  -6   58.39    6.80
  -3  -1  -6   57.19    6.60
  -3  -1  -6   58.19    6.40
  -3  -1  -6   65.09    5.70
   2   1   6   14.40    3.30
   2   1   6   20.90    4.50
   2   1   6   20.50    4.70
  -2  -1  -6   19.80    3.70
  -2  -1  -6   23.00    4.60
  -2  -1  -6   21.80    4.80
  -2  -1  -6   17.50    3.60
   1   1   6  219.58   10.80
   1   1   6  207.98   11.00
   1   1   6  227.68    9.70
   1   1   6  220.68    8.70
  -1  -1  -6  227.18   10.70
  -1  -1  -6  232.58    9.30
  -1  -1  -6  218.68   10.80
  -1  -1  -6  201.08    9.70
  -1  -1  -6  217.18    8.70
   0   1   6   84.19    5.80
   0   1   6   75.79    4.40
   0   1   6   70.89    6.30
   0   1   6   75.29    6.70
   0   1   6   78.69    5.50
   0  -1  -6   72.89    6.40
   0  -1  -6   82.09    6.90
   0  -1  -6   76.79    5.80
   0  -1  -6   74.79    5.60
  -1   1   6   40.00    4.10
  -1   1   6   33.80    4.50
  -1   1   6   40.10    2.60
  -1   1   6   34.40    5.00
  -1   1   6   37.70    5.40
   1  -1  -6   48.50    6.20
   1  -1  -6   44.20    5.70
   1  -1  -6   47.20    4.60
   1  -1  -6   39.00    4.30
  -2   1   6   14.10    2.70
  -2   1   6   11.50    2.80
  -2   1   6   15.30    3.80
  -2   1   6   12.40    3.50
   2  -1  -6   11.80    2.40
   2  -1  -6    8.80    3.40
   2  -1  -6   14.90    2.80
   2  -1  -6   15.50    4.30
  -3   1   6  898.01   23.40
  -3   1   6  903.71   23.50
  -3   1   6  914.81   26.60
  -3   1   6  890.61   21.80
   3  -1  -6  906.31   23.60
   3  -1  -6  886.01   21.40
   3  -1  -6  905.01   26.60
   3  -1  -6  906.41   26.60
  -4   1   6  434.56   15.50
  -4   1   6  445.56   12.80
  -4   1   6  452.05   13.40
   4  -1  -6  460.45   15.90
   4  -1  -6  449.36   15.90
  -5   1   6    1.20    2.00
  -5   1   6    4.00    2.70
  -5   1   6    3.20    2.40
   5  -1  -6    1.50    3.00
   5  -1  -6    2.80    2.90
  -6   1   6    1.20    2.60
  -6   1   6    3.40    2.80
  -6   1   6    2.90    2.70
  -6   1   6   -1.30    1.40
   6  -1  -6   -0.80    2.90
   6  -1  -6    2.60    2.80
  -7   1   6   43.30    3.90
  -7   1   6   40.60    5.50
  -7   1   6   45.30    5.10
  -7   1   6   54.59    5.70
   7  -1  -6   51.19    5.70
  -8   1   6    6.80    3.70
  -8   1   6    4.50    3.80
  -8   1   6    5.10    2.80
  -8   1   6    3.40    2.50
   8  -1  -6   -1.40    2.50
   8  -1  -6    5.80    2.80
  -9   1   6    8.30    4.80
  -9   1   6   11.00    3.20
   9  -1  -6   13.90    2.80
   9  -1  -6   16.30    2.90
 -10   1   6   32.40    5.10
 -10   1   6   26.50    6.30
  12   1   5   52.59    5.50
 -12  -1  -5   45.40   10.90
 -12  -1  -5   56.89   11.50
  11   1   5    6.10    3.50
 -11  -1  -5   21.00    8.10
 -11  -1  -5    4.30    7.00
  10   1   5    2.70    5.60
  10   1   5    6.10    3.80
 -10  -1  -5   19.30    7.80
 -10  -1  -5   11.10    7.00
   9   1   5   90.29   11.80
   9   1   5   72.59    7.30
  -9  -1  -5   85.29   11.80
  -9  -1  -5   72.19   10.60
   8   1   5  180.38   10.00
   8   1   5  193.88   14.00
   8   1   5  204.68   10.70
  -8  -1  -5  173.28   13.90
  -8  -1  -5  203.78   14.50
  -8  -1  -5  182.88   10.10
   7   1   5  158.38    9.80
   7   1   5  202.78   10.40
   7   1   5  157.48   12.80
  -7  -1  -5  201.08   13.40
  -7  -1  -5  195.68   13.70
  -7  -1  -5  178.98   10.00
   6   1   5   70.59    7.30
   6   1   5   84.19    7.30
   6   1   5   91.69    9.70
  -6  -1  -5   86.39    9.20
  -6  -1  -5  108.09   10.00
  -6  -1  -5   94.39    7.60
   5   1   5  281.37   12.10
   5   1   5  260.07   11.90
   5   1   5  259.77   13.40
  -5  -1  -5  255.27   13.40
  -5  -1  -5  272.77   12.00
  -5  -1  -5  259.47   13.30
   4   1   5    9.40    4.00
   4   1   5   10.90    3.60
   4   1   5   18.90    4.10
  -4  -1  -5   16.50    4.80
  -4  -1  -5   31.80    5.30
  -4  -1  -5   20.80    4.40
   3   1   5   36.80    5.20
   3   1   5   48.10    6.00
   3   1   5   50.09    5.30
  -3  -1  -5   45.80    5.90
  -3  -1  -5   53.69    5.30
  -3  -1  -5   42.00    5.80
  -3  -1  -5   34.90    4.90
   2   1   5   60.79    5.40
   2   1   5   56.89    5.80
   2   1   5   78.69    6.20
  -2  -1  -5   71.79    6.10
  -2  -1  -5   57.99    5.90
  -2  -1  -5   60.49    5.30
  -2  -1  -5   64.29    5.10
  -2  -1  -5   71.59    6.30
   1   1   5  232.78    9.50
   1   1   5  260.97   10.70
   1   1   5  235.98   10.50
   1   1   5  242.38    9.00
  -1  -1  -5  247.38    9.90
  -1  -1  -5  257.77   10.70
  -1  -1  -5  224.48    8.80
  -1  -1  -5  251.67    9.20
  -1  -1  -5  241.88   10.80
   0   1   5   30.20    3.80
   0   1   5   23.00    4.00
   0   1   5   24.70    4.20
   0   1   5   31.70    4.00
   0   1   5   29.60    3.10
   0  -1  -5   14.10    3.60
   0  -1  -5   35.20    4.70
   0  -1  -5   23.60    3.40
   0  -1  -5   30.10    4.10
  -1   1   5  326.37   10.50
  -1   1   5  308.67    8.50
  -1   1   5  328.47   12.50
  -1   1   5  302.87   10.00
  -1   1   5  315.27   12.10
   1  -1  -5  333.67   10.20
   1  -1  -5  327.67   12.50
   1  -1  -5  315.07   12.20
   1  -1  -5  315.47   10.20
  -2   1   5 1155.18   28.40
  -2   1   5 1158.78   31.40
  -2   1   5 1184.18   31.70
  -2   1   5 1167.28   28.80
   2  -1  -5 1138.59   27.40
   2  -1  -5 1141.39   28.80
   2  -1  -5 1147.09   31.50
   2  -1  -5 1149.98   27.20
   2  -1  -5 1161.08   31.60
  -3   1   5    0.30    1.60
  -3   1   5    2.30    2.50
  -3   1   5    1.40    2.60
  -3   1   5    3.70    1.50
  -3   1   5    3.90    1.80
   3  -1  -5    1.40    2.60
   3  -1  -5    0.80    2.70
  -4   1   5  236.58    8.50
  -4   1   5  245.88    8.60
  -4   1   5  239.98    9.80
  -4   1   5  236.38    9.60
   4  -1  -5  244.18    9.90
   4  -1  -5  253.77   10.00
  -5   1   5    5.60    2.40
  -5   1   5    8.90    2.80
  -5   1   5    6.80    1.60
  -5   1   5    5.80    2.50
  -5   1   5    2.80    2.40
   5  -1  -5    3.60    2.60
   5  -1  -5    8.10    2.80
  -6   1   5   53.69    4.00
  -6   1   5   49.40    4.60
  -6   1   5   52.29    5.70
   6  -1  -5   63.19    5.20
  -7   1   5  325.57   11.10
  -7   1   5  352.26   11.50
  -7   1   5  361.06   14.40
   7  -1  -5  328.27   11.50
   7  -1  -5  341.77   11.60
  -8   1   5  269.17    8.50
  -8   1   5  255.87   13.10
  -8   1   5  261.87   10.60
   8  -1  -5  255.57    9.00
   8  -1  -5  254.37    8.90
  -9   1   5   33.40    6.00
  -9   1   5   37.50    5.00
 -10   1   5   33.90    7.00
 -10   1   5   29.10    5.10
 -11   1   5   27.20    5.60
 -12   1   5    4.70    5.40
 -12  -1  -4    6.10    7.20
 -12  -1  -4   20.30    8.30
  11   1   4   12.40    3.20
 -11  -1  -4   14.60    7.40
 -11  -1  -4   17.40    7.80
  10   1   4  294.17   18.40
  10   1   4  259.17   11.00
 -10  -1  -4  251.07   17.30
 -10  -1  -4  251.27   17.30
   9   1   4   99.09    7.20
   9   1   4  116.49   11.70
  -9  -1  -4   81.89   11.30
  -9  -1  -4  107.69   12.10
   8   1   4   73.49    6.60
   8   1   4   66.79    9.30
  -8  -1  -4   83.19   10.60
  -8  -1  -4   82.69    6.60
  -8  -1  -4   78.39   10.70
   7   1   4  121.39    7.50
   7   1   4  111.09   10.80
   7   1   4  111.59    7.70
  -7  -1  -4  116.69    7.40
  -7  -1  -4  102.89   10.70
  -7  -1  -4  113.99   11.00
   6   1   4    1.80    2.70
   6   1   4    0.60    2.80
   6   1   4    1.50    3.90
  -6  -1  -4   -1.50    3.70
  -6  -1  -4    2.70    4.20
  -6  -1  -4   -3.60    2.50
   5   1   4  206.08    9.60
   5   1   4  187.78    9.40
   5   1   4  208.98   11.50
  -5  -1  -4  195.48   11.10
  -5  -1  -4  198.08    9.30
  -5  -1  -4  208.98   11.40
   4   1   4 1134.89   32.40
   4   1   4 1127.29   31.20
   4   1   4 1145.59   31.10
  -4  -1  -4 1107.89   30.80
  -4  -1  -4 1087.59   32.40
  -4  -1  -4 1129.09   32.20
  -4  -1  -4 1153.68   31.00
   3   1   4  153.28    8.00
   3   1   4  149.39    7.70
   3   1   4  135.49    8.00
  -3  -1  -4  133.59    8.00
  -3  -1  -4  124.99    7.20
  -3  -1  -4  151.18    8.10
  -3  -1  -4  152.18    7.80
   2   1   4  276.17   11.00
   2   1   4  295.87   11.10
   2   1   4  281.47   10.60
  -2  -1  -4  266.67   10.30
  -2  -1  -4  274.77   10.70
  -2  -1  -4  256.77   10.30
  -2  -1  -4  282.67    9.30
  -2  -1  -4  251.87   10.70
   1   1   4   16.40    3.60
   1   1   4   18.00    2.90
   1   1   4   22.10    3.30
   1   1   4   24.00    3.80
  -1  -1  -4   20.70    3.80
  -1  -1  -4   21.00    3.90
  -1  -1  -4   20.60    3.50
  -1  -1  -4   17.70    2.70
  -1  -1  -4   18.80    2.90
   0   1   4  189.18    7.40
   0   1   4  215.58    9.20
   0   1   4  209.78    6.70
   0   1   4  193.58    7.50
   0   1   4  192.18    8.50
   0  -1  -4  194.78    7.50
   0  -1  -4  208.08    9.10
   0  -1  -4  195.08    8.60
   0  -1  -4  194.48    7.60
  -1   1   4    2.30    1.80
  -1   1   4    1.00    2.50
  -1   1   4    4.50    2.60
  -1   1   4    0.00    2.00
   1  -1  -4   -3.20    2.10
   1  -1  -4    0.50    1.80
   1  -1  -4    0.50    1.80
   1  -1  -4    1.20    2.50
  -2   1   4  712.63   20.40
  -2   1   4  721.03   17.90
  -2   1   4  722.53   20.30
  -2   1   4  710.63   18.20
   2  -1  -4  728.93   20.50
   2  -1  -4  718.93   16.50
   2  -1  -4  701.53   18.20
   2  -1  -4  710.33   16.90
   2  -1  -4  711.23   20.40
  -3   1   4  852.31   22.00
  -3   1   4  887.51   20.60
  -3   1   4  867.81   23.70
  -3   1   4  887.41   22.20
  -3   1   4  850.81   23.70
   3  -1  -4  853.31   23.80
   3  -1  -4  911.01   24.10
  -4   1   4 1077.49   25.80
  -4   1   4 1067.89   28.20
  -4   1   4 1098.99   28.10
  -4   1   4 1078.79   27.60
  -4   1   4 1049.89   28.20
   4  -1  -4 1086.99   28.40
   4  -1  -4 1100.49   28.50
  -5   1   4  411.86   11.80
  -5   1   4  401.46   13.80
  -5   1   4  412.76   12.60
  -5   1   4  414.36   12.60
   5  -1  -4  405.16   12.70
  -6   1   4   30.00    3.30
  -6   1   4   37.90    5.10
  -6   1   4   35.80    4.10
  -6   1   4   39.10    3.50
   6  -1  -4   35.80    3.80
   6  -1  -4   41.70    3.70
  -7   1   4   97.99    6.60
  -7   1   4  104.79    4.50
  -7   1   4  105.99    8.40
  -7   1   4  104.69    4.50
   7  -1  -4  102.59    4.80
   7  -1  -4   98.89    4.80
  -8   1   4  159.48   10.90
  -8   1   4  147.99    8.60
  -9   1   4   50.19    6.60
  -9   1   4   63.19    8.70
 -10   1   4  107.09    8.90
 -11   1   4   17.50    5.40
 -12   1   4   69.49    9.90
 -13   1   4   21.20    7.30
 -13  -1  -3    6.10    7.60
 -13  -1  -3    1.60    7.40
 -12  -1  -3   -4.00    5.60
 -12  -1  -3    7.60    6.80
 -11  -1  -3   11.90    7.10
 -11  -1  -3    2.50    6.40
  10   1   3  155.48   14.30
  10   1   3  147.19    7.00
 -10  -1  -3  174.58   14.40
 -10  -1  -3  168.78   14.40
   9   1   3  156.28   13.10
   9   1   3  166.78    7.70
   9   1   3  187.88    8.30
  -9  -1  -3  177.48   13.70
  -9  -1  -3  167.88   13.60
  -9  -1  -3  178.78    7.80
   8   1   3    6.30    5.30
   8   1   3   14.90    3.60
   8   1   3   14.40    3.30
  -8  -1  -3    9.20    5.40
  -8  -1  -3   11.20    3.10
  -8  -1  -3    6.30    5.70
   7   1   3   14.60    5.30
   7   1   3   22.30    3.80
  -7  -1  -3   34.20    6.20
  -7  -1  -3   19.00    5.60
  -7  -1  -3   32.90    4.40
  -7  -1  -3   19.90    5.60
   6   1   3  149.69    7.70
   6   1   3  144.99    7.50
   6   1   3  151.08   10.30
  -6  -1  -3  158.68   10.70
  -6  -1  -3  162.88    7.50
  -6  -1  -3  138.89    9.90
   5   1   3   24.50    3.60
   5   1   3   23.30    3.70
   5   1   3   21.10    5.00
  -5  -1  -3   24.60    3.60
  -5  -1  -3   11.80    4.10
  -5  -1  -3   19.50    4.50
  -5  -1  -3   27.20    3.80
   4   1   3  123.29    6.70
   4   1   3  110.99    8.00
   4   1   3  126.99    6.70
  -4  -1  -3  122.89    8.10
  -4  -1  -3  133.39    6.60
  -4  -1  -3  118.59    6.50
  -4  -1  -3  129.59    8.40
   3   1   3  319.27   12.20
   3   1   3  332.77   11.20
   3   1   3  296.87   11.00
  -3  -1  -3  325.27   11.10
  -3  -1  -3  319.07   11.00
  -3  -1  -3  285.27   11.50
  -3  -1  -3  314.17   12.00
   2   1   3   77.39    5.40
   2   1   3   76.09    5.60
   2   1   3   73.79    5.40
  -2  -1  -3   75.59    5.20
  -2  -1  -3   68.29    5.10
  -2  -1  -3   76.19    5.40
  -2  -1  -3   62.49    5.40
   1   1   3   20.30    3.50
   1   1   3   13.80    2.70
   1   1   3   15.50    3.10
  -1  -1  -3   10.80    2.40
  -1  -1  -3   13.60    2.80
  -1  -1  -3   13.50    2.50
  -1  -1  -3    9.40    2.90
  -1  -1  -3   13.40    3.30
   0   1   3   36.00    4.10
   0   1   3   46.40    3.10
   0   1   3   46.30    3.60
   0   1   3   44.20    3.70
   0   1   3   47.00    4.40
   0  -1  -3   55.19    4.60
   0  -1  -3   51.49    4.40
   0  -1  -3   45.00    3.60
  -1   1   3  340.27   10.80
  -1   1   3  325.67    9.10
  -1   1   3  323.77    9.30
  -1   1   3  312.37   10.60
   1  -1  -3  343.47    9.30
   1  -1  -3  338.07    9.10
   1  -1  -3  337.67   10.80
   1  -1  -3  319.57   10.80
  -2   1   3  336.37    8.80
  -2   1   3  351.66    9.40
  -2   1   3  331.47   10.80
  -2   1   3  331.17   10.80
   2  -1  -3  352.36   10.90
   2  -1  -3  347.07   11.00
  -3   1   3   40.00    2.40
  -3   1   3   44.30    3.70
  -3   1   3   39.30    3.50
  -3   1   3   44.90    3.60
   3  -1  -3   37.30    3.50
   3  -1  -3   39.50    3.70
  -4   1   3    0.90    2.10
  -4   1   3    0.30    1.50
  -4   1   3   -0.70    1.60
  -4   1   3    1.70    1.50
   4  -1  -3    0.60    1.60
   4  -1  -3    0.30    1.10
  -5   1   3   71.49    3.70
  -5   1   3   70.69    5.80
  -5   1   3   72.79    4.70
  -5   1   3   71.29    3.70
   5  -1  -3   71.69    3.90
   5  -1  -3   64.49    3.80
  -6   1   3  299.67   12.40
  -6   1   3  280.97    8.00
  -6   1   3  287.67   10.70
  -6   1   3  294.77    8.00
   6  -1  -3  282.17    8.30
   6  -1  -3  277.47    8.30
  -7   1   3   74.79    7.60
  -7   1   3   57.29    6.00
  -8   1   3   71.49    7.10
  -8   1   3   67.09    8.50
  -9   1   3  133.99   10.80
  -9   1   3   92.69    8.50
 -10   1   3  172.98   11.20
 -11   1   3    4.30    5.00
 -11   1   3    7.20    5.10
 -12   1   3   18.00    6.20
 -12   1   3   35.10    7.60
 -13   1   3   21.70    7.60
 -13  -1  -2    2.70    7.20
 -13  -1  -2    6.20    7.50
 -12  -1  -2   70.59   11.20
 -12  -1  -2   69.99   11.10
 -11  -1  -2    4.60    6.40
 -11  -1  -2    9.50    7.20
  10   1   2  122.59   12.70
 -10  -1  -2  108.59   11.80
 -10  -1  -2   98.99   11.70
   9   1   2  113.89    5.50
   9   1   2  147.29   13.00
   9   1   2  118.69    5.40
  -9  -1  -2  107.39   10.80
  -9  -1  -2  129.89   12.20
  -9  -1  -2  113.89    4.90
   8   1   2  187.78    7.50
   8   1   2  195.48   13.70
   8   1   2  193.68    7.70
  -8  -1  -2  186.28    7.30
  -8  -1  -2  193.28   13.20
  -8  -1  -2  189.08   13.30
  -8  -1  -2  180.78   12.50
   7   1   2   67.89    8.80
   7   1   2   57.29    4.40
   7   1   2   59.19    4.70
  -7  -1  -2   59.29    4.40
  -7  -1  -2   60.69    8.00
  -7  -1  -2   55.59    7.80
  -7  -1  -2   62.49    4.50
   6   1   2  239.48   12.50
   6   1   2  241.28    8.60
   6   1   2  230.48    8.70
  -6  -1  -2  232.38    8.50
  -6  -1  -2  223.68    8.40
   5   1   2   42.50    6.00
   5   1   2   50.69    4.30
  -5  -1  -2   47.60    6.60
  -5  -1  -2   42.90    3.90
  -5  -1  -2   52.69    4.10
   4   1   2   16.20    2.70
   4   1   2   14.10    3.50
   4   1   2   16.00    2.70
  -4  -1  -2   17.80    3.70
  -4  -1  -2   18.80    2.70
  -4  -1  -2   21.90    2.90
   3   1   2   64.19    4.50
   3   1   2   68.39    5.90
   3   1   2   69.19    4.50
  -3  -1  -2   70.69    4.60
  -3  -1  -2   64.59    4.40
  -3  -1  -2   69.79    5.60
   2   1   2  660.03   18.00
   2   1   2  664.23   18.60
   2   1   2  636.64   17.80
  -2  -1  -2  678.13   17.90
  -2  -1  -2  630.34   18.30
  -2  -1  -2  678.63   17.90
   1   1   2  625.04   17.40
   1   1   2  680.53   17.50
   1   1   2  647.94   17.00
  -1  -1  -2  661.93   17.10
  -1  -1  -2  606.04   17.20
  -1  -1  -2  669.23   17.50
  -1  -1  -2  672.03   17.30
   0   1   2 1479.25   32.60
   0   1   2 1455.25   34.80
   0   1   2 1439.96   33.30
   0   1   2 1416.46   33.70
   0   1   2 1314.87   34.70
   0  -1  -2 1416.06   33.70
   0  -1  -2 1360.46   34.70
   0  -1  -2 1499.35   35.00
   0  -1  -2 1439.86   32.60
  -1   1   2   20.10    1.50
  -1   1   2   19.40    1.70
  -1   1   2   19.80    2.60
  -1   1   2   16.50    2.20
   1  -1  -2   20.60    1.60
   1  -1  -2   16.50    2.40
   1  -1  -2   19.10    1.50
   1  -1  -2   16.20    2.50
  -2   1   2   39.50    3.20
  -2   1   2   46.60    3.50
  -2   1   2   38.30    3.00
  -2   1   2   38.70    2.00
   2  -1  -2   36.00    3.10
  -3   1   2  227.58    7.00
  -3   1   2  235.38    7.20
  -3   1   2  232.88    7.00
  -3   1   2  224.28    8.40
   3  -1  -2  243.58    7.10
   3  -1  -2  220.28    7.00
  -4   1   2   -1.90    2.10
  -4   1   2   -0.40    1.00
  -4   1   2    1.80    1.10
  -4   1   2    0.20    1.80
   4  -1  -2   -0.10    1.10
   4  -1  -2   -0.10    1.20
  -5   1   2  142.89    7.00
  -5   1   2  145.39    8.20
   5  -1  -2  148.19    4.40
  -6   1   2 1342.57   34.90
  -6   1   2 1310.77   36.70
  -7   1   2  335.17   13.10
  -7   1   2  303.67   14.20
  -8   1   2   59.29    8.30
  -8   1   2   52.09    7.20
  -9   1   2    7.30    4.30
  -9   1   2   10.40    5.40
 -10   1   2   17.10    5.50
 -10   1   2   10.80    5.50
 -11   1   2    9.30    5.40
 -11   1   2   14.60    5.60
 -12   1   2  220.48   15.00
 -12   1   2  232.68   15.10
 -13   1   2  183.68   15.00
 -13   1   2  193.08   14.90
 -13  -1  -1    5.20    7.10
 -13  -1  -1   24.20    8.60
 -12  -1  -1  122.19   13.60
 -12  -1  -1  119.79   13.40
 -11  -1  -1  359.16   19.80
 -11  -1  -1  376.96   20.30
  10   1   1  248.58   16.70
 -10  -1  -1  220.98   14.90
 -10  -1  -1  268.37   15.70
   9   1   1    3.60    5.10
  -9  -1  -1    3.20    4.90
   8   1   1    3.00    1.60
   8   1   1    8.00    5.20
   8   1   1    3.20    1.60
  -8  -1  -1    3.90    4.50
  -8  -1  -1   -4.70    4.20
   7   1   1   35.30    6.50
   7   1   1   28.20    3.10
  -7  -1  -1   37.20    3.00
  -7  -1  -1   33.50    6.30
  -7  -1  -1   33.50    6.00
  -7  -1  -1   32.90    2.90
   6   1   1  156.78    6.00
   6   1   1  156.88    6.10
   6   1   1  157.98   10.20
  -6  -1  -1  167.48    5.90
  -6  -1  -1  163.38    9.70
  -6  -1  -1  153.38   10.10
  -6  -1  -1  163.48    5.90
   5   1   1  797.12   20.70
   5   1   1  795.52   20.80
   5   1   1  818.92   25.10
  -5  -1  -1  809.02   20.70
  -5  -1  -1  801.12   20.60
  -5  -1  -1  830.82   24.90
  -5  -1  -1  804.42   24.10
   4   1   1   39.60    5.20
   4   1   1   43.30    3.10
   4   1   1   43.50    3.30
  -4  -1  -1   45.10    3.20
  -4  -1  -1   36.30    5.50
  -4  -1  -1   39.90    3.10
   3   1   1   16.00    2.20
   3   1   1   15.10    3.50
  -3  -1  -1   17.90    3.50
  -3  -1  -1   14.50    2.20
  -3  -1  -1   16.70    2.20
   2   1   1   51.89    4.50
   2   1   1   48.00    3.20
  -2  -1  -1   51.79    3.10
  -2  -1  -1   49.50    3.20
  -2  -1  -1   53.09    4.10
   1   1   1   80.39    3.40
  -1  -1  -1   84.49    3.40
  -1  -1  -1   78.79    3.30
   0   1   1   -0.60    0.40
  -1   1   1  669.73   16.30
  -1   1   1  656.53   16.20
   1  -1  -1  675.73   16.30
  -2   1   1  538.05   14.60
  -2   1   1  547.65   13.10
  -2   1   1  539.55   13.10
   2  -1  -1  550.24   13.20
   2  -1  -1  534.95   13.20
  -3   1   1    8.10    2.60
   3  -1  -1    6.60    2.60
  -4   1   1   37.00    4.80
   4  -1  -1   43.80    5.10
  -5   1   1   16.30    3.60
  -5   1   1   16.10    3.40
   5  -1  -1    8.30    3.10
  -6   1   1  488.75   16.40
  -6   1   1  489.45   17.50
   6  -1  -1  454.35   17.50
  -7   1   1  283.77   12.90
  -7   1   1  299.47   14.10
  -8   1   1   32.40    5.90
  -8   1   1   26.00    6.00
  -9   1   1  206.88   13.80
  -9   1   1  220.88   12.90
 -10   1   1   21.00    6.00
 -10   1   1   13.90    5.60
 -11   1   1   16.00    6.30
 -11   1   1   32.00    7.40
 -12   1   1   15.50    6.90
 -12   1   1   20.70    7.50
 -13   1   1    4.70    6.20
 -13   1   1    5.80    6.10
 -13  -1   0   36.80    9.10
 -13  -1   0   14.00    7.30
 -12  -1   0   48.30    9.70
 -12  -1   0   72.69   10.60
 -11  -1   0   93.99   10.90
 -11  -1   0   86.69   11.50
 -10  -1   0  204.18   13.80
   9   1   0   -1.20    5.20
  -9  -1   0    2.80    4.80
   8   1   0   25.20    6.50
  -8  -1   0   20.40    5.90
  -8  -1   0   19.80    5.60
   7   1   0   26.90    6.30
  -7  -1   0   22.60    5.50
  -7  -1   0   30.20    5.80
   6   1   0   76.89    3.30
   6   1   0   74.79    7.70
   6   1   0   74.19    3.20
  -6  -1   0   68.59    2.70
  -6  -1   0   73.09    2.80
  -6  -1   0   62.59    6.70
  -6  -1   0   74.49    7.00
   5   1   0  156.68    5.20
   5   1   0  166.38    5.20
   5   1   0  152.88    9.10
  -5  -1   0  161.68    5.00
  -5  -1   0  152.38    8.40
  -5  -1   0  154.48    4.90
  -5  -1   0  153.88    9.10
   4   1   0   12.90    3.30
   4   1   0    7.40    1.50
   4   1   0   11.20    1.50
  -4  -1   0    8.10    1.40
  -4  -1   0    5.40    2.70
  -4  -1   0    6.10    3.30
  -4  -1   0    7.30    1.40
   3   1   0   21.10    3.50
   3   1   0   16.30    2.10
  -3  -1   0   16.80    2.10
  -3  -1   0   16.30    3.20
  -3  -1   0   19.20    2.10
  -3  -1   0    7.10    2.60
   2   1   0   27.30    1.90
   2   1   0   29.30    1.80
   2   1   0   30.00    3.60
  -2  -1   0   30.00    1.90
  -2  -1   0   24.50    1.80
  -2  -1   0   28.80    3.00
  -2  -1   0   28.40    3.30
  -1  -1   0  259.77    6.60
  -1   1   0  254.47    6.80
  -2   1   0   27.80    3.40
   2  -1   0   24.70    3.60
  -3   1   0   15.00    3.30
   3  -1   0   21.10    3.60
  -4   1   0    8.50    3.20
   4  -1   0    2.80    2.80
  -5   1   0  142.99    8.80
   5  -1   0  157.58    9.10
  -6   1   0   75.09    7.50
   6  -1   0   82.09    8.00
  -7   1   0   25.90    5.70
  -7   1   0   15.70    4.70
   7  -1   0   24.50    5.50
  -8   1   0   27.80    6.20
  -8   1   0   16.50    5.00
  -9   1   0    3.70    4.90
  -9   1   0    1.20    4.90
 -10   1   0  183.58   13.00
 -10   1   0  214.88   14.00
 -11   1   0   80.89   10.40
 -11   1   0   75.89   10.80
 -12   1   0   46.70    9.50
 -12   1   0   61.89    9.70
 -13   1   0   24.80    8.00
 -13   1   0   31.10    8.90
 -13  -1   1   -5.40    5.50
 -13  -1   1    5.70    6.70
 -12  -1   1   14.90    6.90
 -12  -1   1   25.60    7.30
 -11  -1   1   21.30    7.20
 -11  -1   1   28.00    7.50
 -10  -1   1    9.60    5.50
   9   1  -1  197.48   13.60
  -9  -1   1  177.98   12.10
  -9  -1   1  198.88   13.60
   8   1  -1   42.10    7.30
  -8  -1   1   21.10    5.50
  -8  -1   1   46.60    7.20
   7   1  -1  306.07   14.70
  -7  -1   1  289.57   13.80
  -7  -1   1  311.07   13.50
   6   1  -1  486.95   17.90
  -6  -1   1  496.05   17.80
  -6  -1   1  468.45   16.50
   5   1  -1   17.90    4.00
   5   1  -1   14.80    1.70
   5   1  -1   15.40    1.80
  -5  -1   1   17.50    3.50
  -5  -1   1   16.40    1.50
  -5  -1   1   10.80    3.40
  -5  -1   1   16.30    1.50
   4   1  -1   42.60    2.40
   4   1  -1   42.70    5.00
   4   1  -1   40.80    2.40
  -4  -1   1   41.20    2.20
  -4  -1   1   45.50    5.00
  -4  -1   1   42.30    4.30
  -4  -1   1   41.90    2.30
   3   1  -1   12.90    1.90
   3   1  -1    6.50    1.40
   3   1  -1    9.90    2.60
  -3  -1   1    9.10    2.50
  -3  -1   1    6.70    2.60
  -3  -1   1    8.30    1.40
  -3  -1   1    8.60    1.40
   2   1  -1  567.34   14.40
   2   1  -1  554.74   13.90
   2   1  -1  553.04   14.80
  -2  -1   1  562.74   14.90
  -2  -1   1  543.85   13.90
  -2  -1   1  563.24   14.40
  -2  -1   1  563.34   13.90
   1   1  -1  640.04   15.50
   1   1  -1  582.44   15.00
   1   1  -1  618.44   15.00
  -1  -1   1  633.14   15.00
  -1  -1   1  626.84   15.40
  -1  -1   1  640.64   15.50
  -1  -1   1  639.74   15.10
   0   1  -1    0.30    0.40
  -1   1  -1   77.19    3.20
  -1   1  -1   76.59    3.50
  -1   1  -1   83.19    3.70
  -1   1  -1   77.09    3.20
   1  -1   1   80.39    3.60
   1  -1   1   77.19    3.20
   1  -1   1   80.19    3.70
  -2   1  -1   51.09    2.90
  -2   1  -1   54.69    2.90
  -2   1  -1   48.60    4.30
  -2   1  -1   53.79    4.40
   2  -1   1   40.50    4.40
   2  -1   1   49.60    2.90
  -3   1  -1   15.50    3.10
  -3   1  -1   16.00    2.00
  -3   1  -1   13.30    3.30
  -3   1  -1   15.90    2.00
   3  -1   1   14.50    1.90
   3  -1   1   11.00    1.80
   3  -1   1   18.40    3.60
  -4   1  -1   46.90    5.30
  -4   1  -1   44.40    2.90
  -4   1  -1   42.00    2.80
   4  -1   1   44.00    2.90
   4  -1   1   46.80    5.80
   4  -1   1   44.60    3.00
  -5   1  -1  816.22   24.90
  -5   1  -1  806.62   20.00
  -5   1  -1  799.12   20.10
   5  -1   1  817.62   20.30
   5  -1   1  779.82   24.80
   5  -1   1  801.32   20.30
  -6   1  -1  159.08    5.20
  -6   1  -1  166.48    5.30
  -6   1  -1  160.18    9.90
  -6   1  -1  162.78   10.20
   6  -1   1  160.88    5.50
   6  -1   1  167.28   10.30
   6  -1   1  160.28    5.60
  -7   1  -1   29.00    5.50
  -7   1  -1   30.70    6.10
   7  -1   1   32.90    6.30
   7  -1   1   28.40    2.40
  -8   1  -1    2.10    5.00
  -8   1  -1    0.70    4.40
  -8   1  -1    3.50    4.40
   8  -1   1    2.80    4.30
  -9   1  -1    1.20    4.70
  -9   1  -1    3.60    5.20
 -10   1  -1  245.58   15.50
 -10   1  -1  240.88   15.50
 -11   1  -1  342.27   19.50
 -11   1  -1  431.06   20.80
 -12   1  -1  141.09   14.10
 -12   1  -1  112.99   13.20
 -13   1  -1    3.10    6.90
 -13   1  -1    4.90    7.00
 -13  -1   2  194.78   15.50
 -13  -1   2  194.18   15.80
 -12  -1   2  239.38   15.30
 -12  -1   2  212.88   15.80
 -11  -1   2    6.40    5.10
 -10  -1   2   15.50    5.30
  -9  -1   2    9.20    5.00
  -9  -1   2   14.40    5.10
   8   1  -2   50.59    7.40
  -8  -1   2   60.19    7.50
  -8  -1   2   62.39    8.20
   7   1  -2  320.37   15.10
  -7  -1   2  356.16   13.80
  -7  -1   2  319.37   14.60
   6   1  -2 1254.97   30.90
   6   1  -2 1300.57   31.00
   6   1  -2 1308.47   36.40
  -6  -1   2 1328.57   36.30
  -6  -1   2 1303.77   34.60
   5   1  -2  158.78    8.40
   5   1  -2  143.19    5.20
   5   1  -2  148.99    5.10
  -5  -1   2  145.09    4.90
  -5  -1   2  146.39    5.00
  -5  -1   2  136.39    7.20
  -5  -1   2  154.88    8.20
   4   1  -2   -0.90    2.10
   4   1  -2   -0.60    1.30
   4   1  -2   -2.00    1.30
  -4  -1   2   -0.60    1.30
  -4  -1   2   -1.10    2.20
  -4  -1   2   -1.80    1.90
  -4  -1   2    2.10    1.40
   3   1  -2  235.28    7.70
   3   1  -2  233.48    8.50
   3   1  -2  242.78    7.50
  -3  -1   2  248.38    7.50
  -3  -1   2  241.78    8.50
  -3  -1   2  232.48    7.40
  -3  -1   2  225.48    7.70
   2   1  -2   44.80    3.30
   2   1  -2   39.80    3.30
   2   1  -2   37.30    2.70
   2   1  -2   41.70    3.20
  -2  -1   2   34.70    3.20
  -2  -1   2   36.10    3.00
  -2  -1   2   37.90    3.20
  -2  -1   2   39.60    2.80
   1   1  -2   19.80    1.20
   1   1  -2   20.70    1.80
   1   1  -2   22.00    1.90
   1   1  -2   18.40    2.30
   1   1  -2   19.10    2.60
   1   1  -2   19.90    2.20
  -1  -1   2   25.10    2.80
  -1  -1   2   20.10    1.90
  -1  -1   2   18.00    1.90
  -1  -1   2   18.10    2.30
  -1  -1   2   23.10    2.40
   0   1  -2 1402.66   33.10
   0   1  -2 1371.56   33.70
   0   1  -2 1410.66   31.50
   0   1  -2 1324.17   33.60
   0  -1   2 1400.46   31.70
   0  -1   2 1364.46   33.00
   0  -1   2 1385.26   33.70
   0  -1   2 1351.16   33.60
  -1   1  -2  640.34   15.60
  -1   1  -2  636.64   16.80
  -1   1  -2  656.73   17.30
  -1   1  -2  607.64   17.00
   1  -1   2  627.44   16.80
   1  -1   2  694.13   17.30
   1  -1   2  652.23   17.20
   1  -1   2  647.64   17.20
  -2   1  -2  653.63   17.90
  -2   1  -2  666.93   17.90
  -2   1  -2  694.73   19.10
  -2   1  -2  681.23   18.80
   2  -1   2  657.13   18.80
   2  -1   2  654.33   18.00
   2  -1   2  684.83   18.80
   2  -1   2  679.33   18.00
  -3   1  -2   69.19    5.70
  -3   1  -2   65.59    5.40
  -3   1  -2   70.19    4.30
  -3   1  -2   66.49    4.20
   3  -1   2   67.29    4.30
   3  -1   2   67.79    4.30
   3  -1   2   70.89    6.00
  -4   1  -2   13.50    2.40
  -4   1  -2   18.00    3.80
  -4   1  -2   14.50    2.50
  -4   1  -2   16.10    4.10
   4  -1   2   16.30    2.60
   4  -1   2   12.90    3.70
  -5   1  -2   50.19    6.60
  -5   1  -2   53.39    3.90
  -5   1  -2   49.40    6.60
  -5   1  -2   52.59    3.90
   5  -1   2   48.30    4.00
   5  -1   2   50.69    6.20
  -6   1  -2  230.38   12.00
  -6   1  -2  240.18    8.30
  -6   1  -2  221.08    8.10
  -6   1  -2  229.18   12.20
   6  -1   2  231.28    8.30
   6  -1   2  246.28   12.90
   6  -1   2  230.48    8.40
  -7   1  -2   54.69    7.60
  -7   1  -2   70.19    4.40
  -7   1  -2   61.39    7.90
  -7   1  -2   59.29    4.10
   7  -1   2   60.39    8.80
   7  -1   2   62.79    4.30
   7  -1   2   64.39    4.40
  -8   1  -2  189.38    6.70
  -8   1  -2  204.28   13.60
  -8   1  -2  188.58    6.70
  -8   1  -2  204.08   13.10
   8  -1   2  185.58    7.00
   8  -1   2  181.08   13.30
   8  -1   2  201.78    7.30
  -9   1  -2  118.19   11.30
  -9   1  -2  106.09   11.30
   9  -1   2  110.39    4.40
 -10   1  -2  121.99   11.60
 -10   1  -2   94.59   11.30
 -11   1  -2   -4.80    5.70
 -11   1  -2   13.10    7.30
 -12   1  -2   83.99   12.70
 -12   1  -2   72.29   11.10
 -13   1  -2   12.30    7.80
 -13   1  -2    9.00    7.60
 -13  -1   3   24.70    7.90
 -12  -1   3   33.60    7.50
 -11  -1   3    1.10    4.60
 -10  -1   3  145.69   10.70
  -9  -1   3   97.29    9.90
  -9  -1   3  100.09    8.80
  -8  -1   3   67.29    8.40
  -8  -1   3   53.49    7.00
   7   1  -3   55.39    3.30
   7   1  -3   47.60    7.00
   7   1  -3   56.79    3.30
  -7  -1   3   55.49    7.10
  -7  -1   3   54.09    2.70
  -7  -1   3   55.59    6.20
  -7  -1   3   57.59    2.70
   6   1  -3  293.17    9.20
   6   1  -3  311.17   12.90
   6   1  -3  286.57    9.20
  -6  -1   3  322.07   12.90
  -6  -1   3  295.37   11.20
  -6  -1   3  297.37    8.90
  -6  -1   3  296.17    9.00
   5   1  -3   68.79    4.10
   5   1  -3   65.29    6.00
   5   1  -3   72.39    4.20
  -5  -1   3   56.99    5.60
  -5  -1   3   69.29    5.00
  -5  -1   3   58.69    3.80
  -5  -1   3   71.29    4.00
   4   1  -3    0.40    1.70
   4   1  -3    0.10    1.50
   4   1  -3    0.20    0.50
   4   1  -3    1.10    2.10
  -4  -1   3    0.30    1.70
  -4  -1   3   -0.40    1.90
  -4  -1   3    1.30    1.70
  -4  -1   3    1.10    1.60
   3   1  -3   38.50    3.00
   3   1  -3   42.50    3.90
   3   1  -3   42.10    3.80
   3   1  -3   42.10    3.70
  -3  -1   3   41.90    3.70
  -3  -1   3   37.90    3.60
  -3  -1   3   40.90    3.70
  -3  -1   3   41.20    3.10
  -3  -1   3   46.30    3.90
   2   1  -3  326.67   10.50
   2   1  -3  324.67    8.80
   2   1  -3  322.47   10.60
  -2  -1   3  321.47    8.80
  -2  -1   3  308.57    8.60
  -2  -1   3  319.17    8.70
  -2  -1   3  335.07   10.60
  -2  -1   3  329.77    9.90
  -2  -1   3  324.47   10.60
   1   1  -3  358.96    9.60
   1   1  -3  355.26   11.40
   1   1  -3  354.16    9.60
   1   1  -3  363.36   11.50
   1   1  -3  347.67   10.30
  -1  -1   3  345.57   10.30
  -1  -1   3  334.97   11.20
  -1  -1   3  344.57    9.80
  -1  -1   3  326.67   11.10
   0   1  -3   49.99    2.90
   0   1  -3   58.89    4.50
   0   1  -3   49.60    4.50
   0   1  -3   44.30    3.90
   0   1  -3   57.29    4.40
   0  -1   3   49.30    3.80
   0  -1   3   50.59    4.70
   0  -1   3   51.49    3.00
   0  -1   3   54.59    4.30
   0  -1   3   49.00    4.30
  -1   1  -3   19.30    3.60
  -1   1  -3   20.30    3.50
  -1   1  -3   10.00    2.40
  -1   1  -3   13.70    2.50
  -1   1  -3   15.80    3.40
   1  -1   3   17.80    2.60
   1  -1   3   15.40    2.80
   1  -1   3   18.20    3.30
   1  -1   3   17.40    3.30
   1  -1   3   11.80    3.10
  -2   1  -3   70.69    5.30
  -2   1  -3   71.09    6.00
  -2   1  -3   67.29    5.10
  -2   1  -3   64.49    4.80
   2  -1   3   71.79    5.10
   2  -1   3   66.69    5.30
   2  -1   3   71.99    5.60
   2  -1   3   62.09    5.10
  -3   1  -3  309.27   12.00
  -3   1  -3  320.67   10.90
  -3   1  -3  321.27   12.00
  -3   1  -3  296.07   10.70
   3  -1   3  326.27   10.90
   3  -1   3  299.37   10.80
   3  -1   3  313.57   12.10
  -4   1  -3  134.99    8.30
  -4   1  -3  117.39    7.90
  -4   1  -3  119.69    6.30
  -4   1  -3  125.89    6.30
   4  -1   3  123.89    6.50
   4  -1   3  126.69    7.90
   4  -1   3  130.79    6.60
  -5   1  -3   29.80    3.80
  -5   1  -3   31.00    5.20
  -5   1  -3   25.20    3.50
  -5   1  -3   18.20    4.70
   5  -1   3   21.80    3.50
   5  -1   3   25.90    3.60
   5  -1   3   21.00    4.70
  -6   1  -3  163.58    7.60
  -6   1  -3  167.68   10.80
  -6   1  -3  166.18    7.40
  -6   1  -3  168.58   11.00
   6  -1   3  156.68    7.60
   6  -1   3  165.28   11.20
   6  -1   3  127.29    6.90
  -7   1  -3   18.70    5.90
  -7   1  -3   26.30    3.60
  -7   1  -3   24.20    5.80
   7  -1   3   22.40    3.60
   7  -1   3   13.80    5.30
  -8   1  -3   14.40    3.00
  -8   1  -3   17.40    6.50
   8  -1   3   17.50    6.10
   8  -1   3   10.80    2.90
   8  -1   3   14.60    3.20
  -9   1  -3  179.58   13.60
  -9   1  -3  185.18   13.40
  -9   1  -3  163.98    7.50
   9  -1   3  168.08    7.30
   9  -1   3  169.18    7.60
 -10   1  -3  136.59   13.20
 -10   1  -3  168.68   13.90
  10  -1   3  149.99    6.20
 -11   1  -3    6.80    7.10
 -11   1  -3   24.10    8.30
 -12   1  -3    0.90    6.30
 -12   1  -3   10.90    7.30
 -13   1  -3   -0.10    7.30
 -13   1  -3    5.50    7.70
 -13  -1   4   23.80    7.50
 -12  -1   4   39.40    7.30
 -11  -1   4   17.60    5.50
 -10  -1   4  106.49    9.00
  -9  -1   4   61.79    7.20
  -9  -1   4   47.60    7.10
   8   1  -4  148.89    5.70
   8   1  -4  143.39    5.60
  -8  -1   4  144.99    8.80
  -8  -1   4  170.08   10.80
   7   1  -4  102.09    5.30
   7   1  -4  107.79    5.50
  -7  -1   4  105.89    8.30
  -7  -1   4  102.29    5.10
  -7  -1   4  107.99    7.10
  -7  -1   4   92.79    5.00
   6   1  -4   45.40    4.10
   6   1  -4   37.20    3.90
  -6  -1   4   32.80    4.40
  -6  -1   4   39.50    3.80
  -6  -1   4   40.30    5.60
  -6  -1   4   34.30    3.80
   5   1  -4  421.26   13.30
  -5  -1   4  437.96   14.20
  -5  -1   4  425.66   12.70
  -5  -1   4  424.56   13.20
  -5  -1   4  415.26   13.10
   4   1  -4 1095.19   28.30
   4   1  -4 1039.90   26.30
   4   1  -4 1050.59   28.20
  -4  -1   4 1066.99   28.10
  -4  -1   4 1108.19   27.60
  -4  -1   4 1048.40   27.90
  -4  -1   4 1049.99   26.20
  -4  -1   4 1054.99   27.90
   3   1  -4  886.01   21.60
   3   1  -4  831.92   23.90
   3   1  -4  867.11   24.00
  -3  -1   4  882.81   22.00
  -3  -1   4  871.91   21.00
  -3  -1   4  903.81   24.10
  -3  -1   4  883.41   21.50
  -3  -1   4  887.61   23.90
  -3  -1   4  875.81   23.00
   2   1  -4  694.83   19.10
   2   1  -4  709.23   17.90
   2   1  -4  730.63   20.70
   2   1  -4  709.23   17.00
   2   1  -4  740.53   20.70
  -2  -1   4  709.63   18.10
  -2  -1   4  724.63   20.40
  -2  -1   4  732.53   20.60
  -2  -1   4  725.53   19.20
   1   1  -4   -0.20    2.00
   1   1  -4    5.10    2.70
   1   1  -4    1.60    1.80
   1   1  -4    1.40    2.70
  -1  -1   4   -0.50    1.80
  -1  -1   4   -2.30    2.20
  -1  -1   4    1.20    2.10
  -1  -1   4    3.80    2.60
   0   1  -4  211.68    8.00
   0   1  -4  185.18    6.20
   0   1  -4  196.18    8.60
   0   1  -4  199.78    8.90
   0   1  -4  193.38    7.50
   0  -1   4  197.98    7.40
   0  -1   4  190.98    6.30
   0  -1   4  199.48    7.90
   0  -1   4  190.38    8.40
  -1   1  -4   17.50    2.70
  -1   1  -4   22.00    3.70
  -1   1  -4   21.00    3.70
  -1   1  -4   25.30    3.50
  -1   1  -4   24.90    3.90
   1  -1   4   15.50    3.30
   1  -1   4   19.30    3.40
   1  -1   4   22.00    3.00
   1  -1   4   22.20    3.50
  -2   1  -4  272.57    9.20
  -2   1  -4  264.97   10.70
  -2   1  -4  292.17   10.50
  -2   1  -4  268.17   10.40
  -2   1  -4  265.27   11.00
   2  -1   4  277.07   10.90
   2  -1   4  275.87   10.40
   2  -1   4  298.07   11.00
   2  -1   4  253.87   10.50
  -3   1  -4  160.78    7.70
  -3   1  -4  157.28    8.20
  -3   1  -4  159.38    7.90
  -3   1  -4  141.59    8.30
   3  -1   4  144.49    7.60
   3  -1   4  142.49    8.10
   3  -1   4  139.49    7.70
  -4   1  -4 1069.99   30.10
  -4   1  -4 1073.99   31.80
  -4   1  -4 1124.19   31.80
  -4   1  -4 1104.09   30.20
   4  -1   4 1095.79   31.80
   4  -1   4 1143.19   30.50
   4  -1   4 1122.19   30.50
  -5   1  -4  192.18   10.70
  -5   1  -4  181.18   10.80
  -5   1  -4  192.58    9.00
   5  -1   4  205.78    9.10
   5  -1   4  195.48    9.10
   5  -1   4  191.98   11.20
  -6   1  -4    1.40    3.50
  -6   1  -4    2.20    2.60
  -6   1  -4    5.80    4.80
   6  -1   4    4.50    4.40
   6  -1   4    2.40    2.80
   6  -1   4   -0.30    2.80
  -7   1  -4  116.49   10.30
  -7   1  -4  113.49   11.20
  -7   1  -4  102.99    7.00
   7  -1   4  123.79    7.50
   7  -1   4  118.99   10.60
   7  -1   4  123.49    7.80
  -8   1  -4   70.29   10.60
  -8   1  -4   79.79    6.30
   8  -1   4   72.69    6.50
   8  -1   4   63.79    9.30
  -9   1  -4  109.39   11.90
  -9   1  -4   95.89   11.50
   9  -1   4  104.29    6.70
   9  -1   4  109.69    7.10
 -10   1  -4  246.58   16.60
 -10   1  -4  240.68   16.30
  10  -1   4  251.47   10.30
 -11   1  -4    7.80    6.50
 -11   1  -4   17.10    7.60
  11  -1   4   12.40    2.70
 -12   1  -4    7.90    7.10
 -12   1  -4   22.80    8.40
 -11  -1   5   22.50    5.60
 -10  -1   5   28.30    6.60
 -10  -1   5   31.10    5.50
   9   1  -5   29.10    3.00
   9   1  -5   29.40    3.10
  -9  -1   5   35.90    6.30
  -9  -1   5   38.60    5.30
   8   1  -5  286.47   10.00
   8   1  -5  281.27    9.90
  -8  -1   5  261.57   13.30
  -8  -1   5  287.77   11.50
  -8  -1   5  265.27    9.40
   7   1  -5  348.57   11.90
   7   1  -5  327.87   11.90
  -7  -1   5  334.77   11.90
  -7  -1   5  336.87   11.50
  -7  -1   5  347.17   14.00
   6   1  -5   48.00    4.50
   6   1  -5   46.00    5.20
  -6  -1   5   62.69    5.70
  -6  -1   5   63.19    5.00
  -6  -1   5   57.99    4.70
  -6  -1   5   50.19    5.80
   5   1  -5    2.40    2.60
   5   1  -5    8.00    3.00
  -5  -1   5    1.50    2.50
  -5  -1   5    5.00    2.40
  -5  -1   5    4.60    1.90
  -5  -1   5    5.30    2.60
   4   1  -5  240.78    7.80
   4   1  -5  240.08   10.20
   4   1  -5  259.27   10.30
  -4  -1   5  243.08    9.90
  -4  -1   5  277.47   10.30
  -4  -1   5  245.18    8.40
  -4  -1   5  242.98    7.70
  -4  -1   5  243.88    9.30
   3   1  -5    3.20    1.50
   3   1  -5    1.20    2.60
   3   1  -5    5.20    3.00
  -3  -1   5    6.20    2.20
  -3  -1   5    5.40    1.40
  -3  -1   5    3.40    2.70
  -3  -1   5    3.40    2.00
  -3  -1   5    4.90    2.70
   2   1  -5 1174.18   30.00
   2   1  -5 1138.79   31.90
   2   1  -5 1173.18   32.00
   2   1  -5 1147.69   27.80
   2   1  -5 1179.58   28.60
  -2  -1   5 1197.48   32.10
  -2  -1   5 1177.18   31.80
  -2  -1   5 1188.38   28.90
  -2  -1   5 1170.68   29.80
   1   1  -5  299.17   12.00
   1   1  -5  295.77    9.80
   1   1  -5  304.47   11.90
   1   1  -5  291.07   10.40
  -1  -1   5  299.67   10.30
  -1  -1   5  311.37   10.10
  -1  -1   5  302.57   11.70
  -1  -1   5  290.97   11.60
   0   1  -5   24.00    3.80
   0   1  -5   32.90    4.90
   0   1  -5   33.20    2.90
   0   1  -5   28.50    3.60
   0   1  -5   23.80    4.10
   0  -1   5   30.10    2.90
   0  -1   5   20.70    3.00
   0  -1   5   31.10    4.10
   0  -1   5   28.40    4.50
   0  -1   5   36.80    5.20
  -1   1  -5  246.88    8.90
  -1   1  -5  241.78   10.20
  -1   1  -5  241.48    9.20
  -1   1  -5  267.77   10.80
  -1   1  -5  253.47   11.00
   1  -1   5  247.88   10.00
   1  -1   5  250.47   10.80
   1  -1   5  244.88    9.00
   1  -1   5  246.78   10.50
  -2   1  -5   56.39    6.10
  -2   1  -5   57.99    5.90
  -2   1  -5   53.19    5.10
  -2   1  -5   57.59    4.90
  -2   1  -5   60.79    5.80
   2  -1   5   60.59    6.10
   2  -1   5   60.59    5.80
   2  -1   5   58.39    5.30
   2  -1   5   55.49    5.60
  -3   1  -5   47.10    5.70
  -3   1  -5   39.70    5.30
  -3   1  -5   40.40    4.70
  -3   1  -5   46.80    6.00
  -3   1  -5   47.70    5.00
   3  -1   5   44.30    5.60
   3  -1   5   45.90    5.30
   3  -1   5   48.00    5.70
  -4   1  -5   20.60    5.00
  -4   1  -5   14.90    4.00
  -4   1  -5    4.30    3.30
   4  -1   5   12.00    3.70
   4  -1   5   17.20    3.80
   4  -1   5   21.40    4.90
  -5   1  -5  264.57   13.30
  -5   1  -5  250.77   11.60
  -5   1  -5  257.27   13.20
   5  -1   5  257.87   11.50
   5  -1   5  267.77   13.40
   5  -1   5  255.57   11.50
  -6   1  -5   85.29    7.20
  -6   1  -5   68.99    8.80
  -6   1  -5   83.39    8.80
   6  -1   5   85.19    9.50
   6  -1   5   91.29    7.30
   6  -1   5   97.19    7.50
  -7   1  -5  198.78   13.50
  -7   1  -5  189.98   10.00
  -7   1  -5  212.78   14.10
   7  -1   5  182.68   13.50
   7  -1   5  185.58   10.20
   7  -1   5  186.08   10.00
  -8   1  -5  182.18    9.90
  -8   1  -5  202.48   14.80
   8  -1   5  205.28   10.70
   8  -1   5  197.48   10.30
   8  -1   5  199.48   14.50
  -9   1  -5   76.59   11.30
   9  -1   5   80.69    7.40
 -10   1  -5   11.10    7.00
 -10   1  -5   12.10    6.90
  10  -1   5    6.50    3.60
 -11   1  -5    5.30    6.90
 -11   1  -5   -4.00    5.90
  11  -1   5    3.10    3.20
 -12   1  -5   49.10   10.40
 -12   1  -5   51.39   11.10
 -10  -1   6   39.50    7.20
 -10  -1   6   34.80    5.10
   9   1  -6   15.90    3.00
   9   1  -6   17.10    3.10
  -9  -1   6    7.70    3.50
  -9  -1   6   10.40    4.50
   8   1  -6   11.90    3.30
   8   1  -6    9.80    3.00
  -8  -1   6    5.20    3.80
  -8  -1   6    5.00    3.70
  -8  -1   6    6.30    3.00
  -8  -1   6   10.10    3.10
   7   1  -6   53.29    5.80
  -7  -1   6   45.40    6.30
  -7  -1   6   52.89    5.50
  -7  -1   6   49.00    6.30
  -7  -1   6   62.89    4.90
   6   1  -6   -1.90    2.90
   6   1  -6    2.20    2.70
  -6  -1   6    0.70    2.90
  -6  -1   6    0.20    2.60
  -6  -1   6    1.90    2.70
  -6  -1   6    0.10    2.00
   5   1  -6    3.80    1.70
   5   1  -6    0.00    2.60
   5   1  -6   -2.40    2.80
  -5  -1   6    0.30    2.00
  -5  -1   6    1.10    2.60
  -5  -1   6    1.30    2.70
  -5  -1   6    2.90    1.70
   4   1  -6  444.36   12.30
   4   1  -6  443.76   16.00
   4   1  -6  476.55   16.20
  -4  -1   6  464.15   14.40
  -4  -1   6  450.65   15.90
  -4  -1   6  451.85   12.50
   3   1  -6  876.81   25.70
   3   1  -6  884.21   21.60
   3   1  -6  839.32   23.40
   3   1  -6  840.82   25.60
  -3  -1   6  853.71   22.50
  -3  -1   6  877.21   23.40
  -3  -1   6  830.62   25.50
   2   1  -6   17.50    2.60
   2   1  -6   13.00    3.70
   2   1  -6   17.90    2.60
   2   1  -6   16.30    3.90
   2   1  -6   16.80    3.30
  -2  -1   6   14.00    3.10
  -2  -1   6    7.90    3.40
  -2  -1   6   12.30    2.90
  -2  -1   6   26.00    4.60
   1   1  -6   42.70    4.60
   1   1  -6   40.70    5.50
   1   1  -6   39.80    4.80
   1   1  -6   46.00    5.30
  -1  -1   6   40.80    4.50
  -1  -1   6   41.90    4.60
  -1  -1   6   45.80    6.00
  -1  -1   6   42.90    5.60
   0   1  -6   72.29    4.10
   0   1  -6   62.69    6.40
   0   1  -6   68.39    5.80
   0   1  -6   70.49    6.30
   0   1  -6   61.79    5.40
   0  -1   6   67.19    5.40
   0  -1   6   69.89    6.20
   0  -1   6   62.49    6.20
   0  -1   6   69.39    5.40
  -1   1  -6  229.48    8.80
  -1   1  -6  210.78    9.20
  -1   1  -6  217.38   11.10
  -1   1  -6  232.48   11.10
  -1   1  -6  224.28   10.30
   1  -1   6  212.88    9.80
   1  -1   6  223.88    8.80
   1  -1   6  262.17   11.20
   1  -1   6  220.28   10.80
   1  -1   6  231.18    9.20
  -2   1  -6   16.20    4.50
  -2   1  -6    9.80    3.10
  -2   1  -6   26.50    4.80
  -2   1  -6   16.00    3.40
   2  -1   6   20.90    4.20
   2  -1   6   13.00    3.40
   2  -1   6   21.20    4.80
   2  -1   6   25.70    4.90
  -3   1  -6   52.79    7.10
  -3   1  -6   52.89    5.40
  -3   1  -6   51.79    6.70
  -3   1  -6   45.70    6.00
   3  -1   6   46.50    5.80
   3  -1   6   53.49    6.50
   3  -1   6   51.39    6.30
  -4   1  -6    3.70    4.00
  -4   1  -6    5.20    3.70
  -4   1  -6    2.30    2.80
  -4   1  -6    9.30    4.20
   4  -1   6    1.90    3.70
   4  -1   6    1.50    3.30
   4  -1   6   10.30    4.10
  -5   1  -6   46.30    6.90
  -5   1  -6   49.99    7.90
  -5   1  -6   39.50    5.40
  -5   1  -6   52.59    7.60
   5  -1   6   45.10    6.50
   5  -1   6   60.09    8.00
   5  -1   6   52.59    6.60
  -6   1  -6   35.70    5.70
  -6   1  -6   40.20    7.90
  -6   1  -6   40.80    7.30
   6  -1   6   43.30    6.30
   6  -1   6   39.70    7.40
   6  -1   6   44.20    6.70
  -7   1  -6   48.50    8.60
  -7   1  -6   62.89    7.50
   7  -1   6   40.70    7.80
   7  -1   6   63.39    7.70
   7  -1   6   57.79    7.20
  -8   1  -6  182.28   13.80
  -8   1  -6  180.18   10.60
   8  -1   6  172.78   13.80
   8  -1   6  182.28   11.00
   8  -1   6  176.58   10.40
  -9   1  -6  159.18   13.70
   9  -1   6  148.29   10.10
 -10   1  -6   -1.10    6.00
 -10   1  -6   -5.00    5.70
  10  -1   6    3.80    3.90
 -11   1  -6   -1.40    6.90
 -11   1  -6   -6.80    5.60
  11  -1   6    6.50    3.90
 -12   1  -6   -1.00    7.70
 -12   1  -6    2.00    7.50
  12  -1   6   -5.30    2.90
  10   1  -7  214.18    8.80
   9   1  -7  236.48   10.20
  -9  -1   7  205.98    9.00
  -9  -1   7  232.28   12.30
   8   1  -7   23.10    4.30
  -8  -1   7   11.30    4.30
  -8  -1   7    9.30    3.40
  -8  -1   7   17.40    3.00
  -8  -1   7   19.00    4.50
   7   1  -7  158.38    9.70
   7   1  -7  177.98    9.60
  -7  -1   7  171.08    9.10
  -7  -1   7  172.28    6.80
  -7  -1   7  178.28    9.50
  -7  -1   7  177.68    9.60
   6   1  -7  211.08   10.70
   6   1  -7  222.58   11.10
  -6  -1   7  206.48    8.80
  -6  -1   7  204.48   10.40
  -6  -1   7  209.58    9.80
   5   1  -7  300.17   13.30
   5   1  -7  306.97   13.40
   5   1  -7  297.37    9.10
  -5  -1   7  320.07   11.90
  -5  -1   7  323.57   13.50
  -5  -1   7  321.47   10.00
   4   1  -7  245.38   11.80
   4   1  -7  226.28    7.40
   4   1  -7  222.58   11.20
  -4  -1   7  230.48    9.40
  -4  -1   7  210.98   11.00
   3   1  -7  542.25   16.70
   3   1  -7  574.24   19.40
   3   1  -7  538.15   19.20
   3   1  -7  520.45   13.70
   3   1  -7  537.95   14.90
  -3  -1   7  540.45   19.10
  -3  -1   7  547.75   16.60
   2   1  -7  101.29    8.30
   2   1  -7   96.39    5.30
   2   1  -7   89.59    6.20
   2   1  -7  100.29    5.80
   2   1  -7  105.89    8.10
  -2  -1   7   97.89    6.40
  -2  -1   7   94.99    8.00
  -2  -1   7   89.79    6.00
   1   1  -7   12.10    3.40
   1   1  -7    2.80    4.10
   1   1  -7   12.60    3.30
   1   1  -7   11.00    3.80
  -1  -1   7   11.70    3.30
  -1  -1   7    3.80    3.60
  -1  -1   7   10.80    3.10
   0   1  -7    8.00    4.00
   0   1  -7   10.00    3.30
   0   1  -7    6.70    3.40
   0   1  -7    7.30    4.00
   0  -1   7    5.80    3.50
   0  -1   7   13.60    3.50
   0  -1   7    5.00    3.10
  -1   1  -7   56.09    6.40
  -1   1  -7   40.30    4.50
  -1   1  -7   48.60    5.60
  -1   1  -7   50.99    6.70
   1  -1   7   41.30    5.60
   1  -1   7   43.50    6.30
   1  -1   7   44.70    6.10
   1  -1   7   45.10    5.30
   1  -1   7   51.99    4.80
  -2   1  -7  141.09    9.60
  -2   1  -7  145.79    9.60
  -2   1  -7  148.59    8.30
  -2   1  -7  143.09    8.00
   2  -1   7  163.48   10.00
   2  -1   7  158.88    8.40
   2  -1   7  140.89    9.30
   2  -1   7  147.09    8.80
  -3   1  -7  362.96   14.20
  -3   1  -7  341.07   15.40
  -3   1  -7  361.16   15.70
  -3   1  -7  365.86   13.40
   3  -1   7  341.87   15.30
   3  -1   7  367.46   14.70
   3  -1   7  338.87   14.90
  -4   1  -7  112.09    7.60
  -4   1  -7   97.89    8.90
  -4   1  -7  118.39   10.30
  -4   1  -7  100.99    8.60
   4  -1   7  103.39    8.90
   4  -1   7   94.59    8.60
   4  -1   7   92.99    8.70
  -5   1  -7    9.10    3.80
  -5   1  -7    7.70    5.10
  -5   1  -7   16.10    5.20
  -5   1  -7   13.90    4.70
   5  -1   7    2.00    4.50
   5  -1   7    5.40    4.40
   5  -1   7    4.70    4.30
  -6   1  -7    4.70    3.50
  -6   1  -7   -0.50    5.50
  -6   1  -7    0.40    4.70
  -6   1  -7    2.20    4.10
   6  -1   7   -2.80    4.20
   6  -1   7    2.30    4.00
   6  -1   7    6.10    4.10
  -7   1  -7    8.70    4.60
  -7   1  -7   12.90    6.20
   7  -1   7   12.00    5.00
   7  -1   7   11.20    5.70
   7  -1   7    8.20    4.50
  -8   1  -7   41.70    6.60
  -8   1  -7   54.19    9.60
   8  -1   7   60.59    8.00
  -9   1  -7   80.99   11.40
   9  -1   7   73.09    8.70
 -10   1  -7   20.20    8.10
 -10   1  -7   20.40    7.70
  10  -1   7   32.60    6.30
 -11   1  -7   -0.10    7.20
 -11   1  -7   12.30    8.50
  11  -1   7   22.50    5.50
  11   1  -8    9.30    2.70
  10   1  -8   40.60    5.30
   9   1  -8  178.38    9.90
   8   1  -8   86.29    7.70
  -8  -1   8   78.29    7.00
   7   1  -8    1.70    3.40
   7   1  -8    6.40    4.10
  -7  -1   8    8.00    3.00
  -7  -1   8    3.50    3.40
  -7  -1   8    3.50    3.60
   6   1  -8   25.30    5.40
   6   1  -8   21.40    5.10
  -6  -1   8   27.40    4.60
  -6  -1   8   31.50    5.50
   5   1  -8   17.50    2.10
   5   1  -8   19.70    4.90
   5   1  -8   34.10    6.10
  -5  -1   8   23.20    4.10
  -5  -1   8    8.10    4.20
   4   1  -8   34.90    6.10
   4   1  -8   18.60    4.90
   4   1  -8   28.00    3.10
  -4  -1   8   38.00    4.70
  -4  -1   8   33.60    5.70
   3   1  -8  230.08    8.00
   3   1  -8  219.68    9.90
   3   1  -8  246.18    8.50
   3   1  -8  258.67   13.00
   3   1  -8  240.48   12.20
  -3  -1   8  232.48   12.40
  -3  -1   8  222.98    9.70
   2   1  -8  376.56   12.70
   2   1  -8  387.66   16.10
   2   1  -8  391.36   12.60
   2   1  -8  375.46   13.80
   2   1  -8  387.26   16.60
  -2  -1   8  378.66   16.30
  -2  -1   8  387.96   13.90
  -2  -1   8  379.36   13.60
   1   1  -8   18.30    4.20
   1   1  -8   16.80    5.10
   1   1  -8   27.10    4.30
  -1  -1   8   26.70    5.40
  -1  -1   8   21.40    4.10
  -1  -1   8   23.20    4.70
   0   1  -8  266.77   12.00
   0   1  -8  250.97   13.30
   0   1  -8  263.87   11.30
   0  -1   8  279.47   11.80
   0  -1   8  273.57   13.60
   0  -1   8  282.37   11.60
  -1   1  -8  404.16   15.20
  -1   1  -8  453.25   18.50
  -1   1  -8  442.86   14.10
  -1   1  -8  422.96   16.40
   1  -1   8  436.96   16.20
   1  -1   8  422.66   15.00
   1  -1   8  397.06   17.40
  -2   1  -8   55.89    7.80
  -2   1  -8   58.89    7.80
  -2   1  -8   56.29    6.00
  -2   1  -8   59.09    6.90
   2  -1   8   66.09    6.50
   2  -1   8   53.39    7.30
  -3   1  -8   23.10    6.00
  -3   1  -8   25.30    4.70
  -3   1  -8   22.00    4.60
  -3   1  -8   39.30    7.10
   3  -1   8   30.00    5.70
   3  -1   8   27.40    4.90
  -4   1  -8  144.69    9.30
  -4   1  -8  140.59   11.20
  -4   1  -8  146.99   10.90
  -4   1  -8  125.49    9.80
   4  -1   8  136.79   10.90
   4  -1   8  141.69   11.00
   4  -1   8  126.19    9.90
  -5   1  -8  277.27   14.50
  -5   1  -8  284.87   12.90
  -5   1  -8  313.57   15.30
  -5   1  -8  285.47   16.50
   5  -1   8  286.07   15.30
   5  -1   8  285.37   15.20
   5  -1   8  307.87   15.20
  -6   1  -8  422.56   18.90
  -6   1  -8  457.75   21.30
  -6   1  -8  434.66   16.60
  -6   1  -8  437.96   19.80
   6  -1   8  453.65   19.40
   6  -1   8  428.46   20.00
   6  -1   8  442.36   18.80
  -7   1  -8  100.69    9.80
  -7   1  -8   96.49   12.00
   7  -1   8  109.59   10.30
   7  -1   8   75.39   10.40
  -8   1  -8   54.69    8.00
  -8   1  -8   43.80    9.00
   8  -1   8   61.79    8.40
  -9   1  -8   -3.70    5.60
   9  -1   8    4.60    4.80
 -10   1  -8   98.29   13.50
 -10   1  -8  120.29   14.40
  10  -1   8   99.59   10.10
 -11   1  -8   41.90   10.10
 -11   1  -8   45.90   10.80
  11  -1   8   53.09    8.00
  11   1  -9   50.39    5.90
  10   1  -9   45.70    6.60
   9   1  -9    5.50    3.90
   8   1  -9    4.50    4.00
   7   1  -9   60.19    7.80
  -7  -1   9   50.49    7.20
   6   1  -9   49.99    7.50
   6   1  -9   44.80    7.10
  -6  -1   9   58.49    7.70
  -6  -1   9   57.79    6.20
   5   1  -9   82.99    9.10
   5   1  -9   90.29    3.90
   5   1  -9   85.69    8.70
  -5  -1   9   91.09    8.90
  -5  -1   9   89.69    7.20
   4   1  -9  152.78   10.90
   4   1  -9  164.28   11.40
   4   1  -9  159.58    6.30
  -4  -1   9  157.78    8.50
  -4  -1   9  141.59   10.70
   3   1  -9    3.10    4.70
   3   1  -9    2.40    3.20
   3   1  -9    3.50    2.40
   3   1  -9   -2.20    4.30
   3   1  -9    4.50    2.30
  -3  -1   9    0.20    3.70
  -3  -1   9    3.50    3.10
   2   1  -9  200.98   12.80
   2   1  -9  187.88    9.90
   2   1  -9  220.48    9.10
   2   1  -9  186.28    9.00
  -2  -1   9  194.08   12.40
  -2  -1   9  189.78    9.70
  -2  -1   9  196.78   10.30
   1   1  -9  248.38   11.00
   1   1  -9  232.98   11.50
   1   1  -9  256.47   14.30
  -1  -1   9  217.48   11.10
  -1  -1   9  221.98   13.20
  -1  -1   9  232.98   11.10
   0   1  -9  249.28   11.40
   0   1  -9  241.28   13.60
   0   1  -9  239.08   11.90
   0  -1   9  246.78   11.60
   0  -1   9  219.78   11.40
   0  -1   9  214.68   13.10
  -1   1  -9  112.59    9.20
  -1   1  -9  109.09    8.80
  -1   1  -9  107.79    9.90
   1  -1   9  117.59   10.00
   1  -1   9  118.19    8.50
  -2   1  -9   21.10    5.70
  -2   1  -9   18.60    5.10
  -2   1  -9   18.50    6.30
  -2   1  -9   12.00    4.00
   2  -1   9   29.20    6.40
  -3   1  -9   28.80    5.40
  -3   1  -9   18.50    5.70
  -3   1  -9   28.00    5.50
  -3   1  -9   23.30    6.40
   3  -1   9   33.50    5.50
   3  -1   9   14.10    5.40
  -4   1  -9    6.30    5.70
  -4   1  -9    7.30    5.20
  -4   1  -9    8.10    4.50
  -4   1  -9   14.10    4.80
   4  -1   9   12.50    5.30
   4  -1   9   16.20    4.90
  -5   1  -9   53.69    8.30
  -5   1  -9   37.30    8.30
  -5   1  -9   42.90    6.60
  -5   1  -9   37.30    6.80
   5  -1   9   45.60    7.40
   5  -1   9   36.00    7.20
  -6   1  -9  138.69   13.30
  -6   1  -9  141.99   11.50
   6  -1   9  156.88   12.20
  -7   1  -9   84.59    9.80
  -7   1  -9   88.29   12.10
   7  -1   9   75.39    9.60
  -8   1  -9   69.29   11.40
   8  -1   9   51.99    8.20
  -9   1  -9   19.20    7.50
   9  -1   9    6.00    5.30
 -10   1  -9   79.19   13.10
 -10   1  -9  109.89   15.10
  10  -1   9   99.29   10.80
  11   1 -10  169.88   10.10
  10   1 -10  138.49   10.10
   9   1 -10    6.70    4.30
   8   1 -10   83.69    9.20
   7   1 -10  233.88   14.00
  -7  -1  10  264.27   14.10
   6   1 -10   16.90    5.60
  -6  -1  10   16.00    5.40
   5   1 -10   27.60    6.30
   5   1 -10   35.40    6.60
  -5  -1  10   31.90    4.80
  -5  -1  10   18.40    6.00
   4   1 -10  311.97   12.80
   4   1 -10  322.67   16.20
   4   1 -10  316.77   10.20
  -4  -1  10  314.67   16.20
  -4  -1  10  326.07   13.00
   3   1 -10   37.40    5.40
   3   1 -10   35.30    4.50
   3   1 -10   26.80    6.30
   3   1 -10   39.40    4.80
  -3  -1  10   40.30    5.40
  -3  -1  10   47.00    7.80
   2   1 -10  102.99    7.60
   2   1 -10   88.39    7.90
   2   1 -10  105.49    7.00
   2   1 -10  120.69   11.30
  -2  -1  10  106.19    8.00
  -2  -1  10   94.39   10.20
   1   1 -10   79.89    7.80
   1   1 -10   86.09    9.70
   1   1 -10   80.09    7.60
  -1  -1  10   66.79    9.60
  -1  -1  10   75.59    7.40
  -1  -1  10   89.39    8.40
   0   1 -10  155.08    9.80
   0   1 -10  140.59    9.90
   0   1 -10  141.79   12.40
   0  -1  10  133.59    9.70
   0  -1  10  133.49   12.20
  -1   1 -10  133.99   11.60
  -1   1 -10  138.89   10.00
  -1   1 -10  130.69   10.60
   1  -1  10  137.19   12.20
   1  -1  10  152.58    9.90
  -2   1 -10  156.38   12.90
  -2   1 -10  125.29   10.80
  -2   1 -10  151.68    9.20
  -2   1 -10  153.18   10.60
   2  -1  10  142.99   11.70
  -3   1 -10   31.30    7.20
  -3   1 -10   24.70    5.70
  -3   1 -10   33.80    5.70
  -3   1 -10   29.90    7.10
   3  -1  10   32.70    6.90
  -4   1 -10    2.50    4.30
  -4   1 -10    6.20    5.50
  -4   1 -10    8.50    6.10
  -4   1 -10    1.90    4.10
   4  -1  10    1.30    4.50
  -5   1 -10    1.60    4.30
  -5   1 -10   17.00    7.20
  -5   1 -10    9.70    4.80
  -5   1 -10    9.90    5.00
   5  -1  10    8.60    5.30
  -6   1 -10    9.00    5.70
  -6   1 -10    8.10    6.60
   6  -1  10   13.00    5.60
  -7   1 -10   31.20    8.80
  -7   1 -10   49.60    8.60
   7  -1  10   38.40    7.90
  -8   1 -10   31.20    9.60
   8  -1  10   30.50    7.70
  -9   1 -10   57.49   11.20
   9  -1  10   91.29   10.80
 -10   1 -10   67.49   13.00
 -10   1 -10   61.09   12.00
  10  -1  10   53.39    9.20
  10   1 -11   60.29    8.60
   9   1 -11   47.70    7.60
   8   1 -11    3.80    4.70
   7   1 -11   -4.60    4.40
   6   1 -11    1.20    4.80
  -6  -1  11   10.80    5.40
   5   1 -11   40.10    7.80
  -5  -1  11   34.80    7.10
   4   1 -11   79.29    5.00
   4   1 -11   97.09   10.60
   4   1 -11   81.19    7.10
  -4  -1  11   74.69    9.50
  -4  -1  11   83.49    7.30
   3   1 -11   12.50    3.10
   3   1 -11    1.90    4.70
   3   1 -11   16.10    4.50
   3   1 -11   11.70    3.20
  -3  -1  11    1.70    4.60
  -3  -1  11   15.50    4.10
   2   1 -11   63.69    6.80
   2   1 -11   62.79    7.60
   2   1 -11   63.99    6.30
   2   1 -11   75.39   10.50
  -2  -1  11   78.59   10.40
  -2  -1  11   77.09    8.40
   1   1 -11   62.19    7.80
   1   1 -11   61.69    7.60
   1   1 -11   71.49   10.60
  -1  -1  11   64.69    9.30
  -1  -1  11   73.69    8.40
   0   1 -11  364.26   15.20
   0   1 -11  324.47   18.00
   0   1 -11  330.37   15.50
   0  -1  11  372.06   15.80
   0  -1  11  355.06   18.90
  -1   1 -11   -0.30    4.90
  -1   1 -11    8.10    4.60
  -1   1 -11    7.50    4.80
   1  -1  11    2.10    5.40
  -2   1 -11  118.69   10.70
  -2   1 -11   97.99    9.50
  -2   1 -11  121.79   12.40
   2  -1  11  102.79   11.10
  -3   1 -11  202.98   14.60
  -3   1 -11  246.18   13.50
  -3   1 -11  249.78   15.00
  -3   1 -11  236.08   12.50
   3  -1  11  261.87   16.00
  -4   1 -11  244.08   15.90
  -4   1 -11  266.17   16.70
  -4   1 -11  234.28   13.80
  -4   1 -11  256.97   14.10
   4  -1  11  267.77   16.30
  -5   1 -11  184.28   14.90
  -5   1 -11  170.98   14.00
   5  -1  11  166.48   13.30
  -6   1 -11   77.39   11.50
  -6   1 -11   94.99   11.70
   6  -1  11   78.99   11.20
  -7   1 -11   29.60    7.70
  -7   1 -11   26.30    9.10
   7  -1  11   20.90    7.60
  -8   1 -11   -7.10    5.70
   8  -1  11    2.30    5.60
  -9   1 -11   55.69   11.00
  -9   1 -11   49.10   11.00
   9  -1  11   51.99    9.70
   9   1 -12   29.10    7.10
   8   1 -12   25.80    7.10
   7   1 -12   94.89   10.70
   6   1 -12  155.28   13.10
  -6  -1  12  120.39   11.60
   5   1 -12   26.40    7.30
  -5  -1  12   47.70    8.60
   4   1 -12   24.30    6.70
   4   1 -12   22.00    4.50
  -4  -1  12   30.80    7.30
   3   1 -12   87.69    7.90
   3   1 -12   81.99    6.30
   3   1 -12   79.39   10.00
  -3  -1  12   85.19   10.20
   2   1 -12   10.00    4.70
   2   1 -12   14.60    6.40
   2   1 -12   17.00    4.50
  -2  -1  12   23.00    6.60
   1   1 -12    4.60    4.00
   1   1 -12    6.30    5.60
   1   1 -12    2.60    4.00
  -1  -1  12    0.00    5.40
   0   1 -12   31.60    6.10
   0   1 -12   21.10    7.10
   0   1 -12   30.20    6.10
   0  -1  12   20.40    6.70
  -1   1 -12  309.67   16.10
  -1   1 -12  323.27   15.30
  -1   1 -12  333.17   18.80
   1  -1  12  320.27   18.90
  -2   1 -12    5.50    4.60
  -2   1 -12    1.40    6.10
  -2   1 -12    6.70    5.10
   2  -1  12    5.20    5.20
  -3   1 -12   50.59    8.70
  -3   1 -12   43.70    7.30
  -3   1 -12   44.10    8.50
   3  -1  12   42.00    8.80
  -4   1 -12    8.50    5.90
  -4   1 -12   11.30    5.20
  -4   1 -12   -9.50    5.00
  -4   1 -12    8.60    5.20
   4  -1  12    3.00    5.30
  -5   1 -12  174.38   15.00
  -5   1 -12  199.38   15.70
   5  -1  12  189.28   14.70
  -6   1 -12  106.39   13.80
  -6   1 -12  115.39   13.30
   6  -1  12  122.69   13.30
  -7   1 -12   11.20    7.30
   7  -1  12   22.30    7.60
  -8   1 -12    9.10    8.00
   8  -1  12   -0.80    5.70
   9   1 -13   25.40    7.60
   8   1 -13   12.40    6.50
   7   1 -13   17.90    7.30
   6   1 -13   55.59    9.40
   5   1 -13  214.58   15.90
  -5  -1  13  181.68   14.80
   4   1 -13   80.69    7.60
   4   1 -13   96.79   11.40
  -4  -1  13   89.89   11.70
   3   1 -13   12.10    4.30
   3   1 -13   24.30    4.20
   3   1 -13   19.40    7.50
  -3  -1  13    4.30    6.20
   2   1 -13    8.40    4.50
   2   1 -13   -7.40    4.50
   2   1 -13    5.00    3.80
  -2  -1  13    4.60    6.40
   1   1 -13    3.90    4.70
   1   1 -13    7.90    6.10
   1   1 -13    8.10    4.50
  -1  -1  13   16.30    7.30
   0   1 -13    2.40    4.50
   0   1 -13    3.30    4.80
   0   1 -13    8.10    6.20
   0  -1  13   14.30    6.80
  -1   1 -13   86.09    9.90
  -1   1 -13   93.69    9.70
  -1   1 -13   81.49   11.60
   1  -1  13   92.59   11.80
  -2   1 -13   86.29    9.80
  -2   1 -13   83.39   11.70
  -2   1 -13   95.29   10.80
   2  -1  13   83.29   11.90
  -3   1 -13   -3.70    5.90
  -3   1 -13   -1.00    4.40
  -3   1 -13   -9.80    4.50
   3  -1  13   16.20    7.40
  -4   1 -13   -4.90    5.90
  -4   1 -13    5.80    6.20
  -4   1 -13   20.10    6.30
   4  -1  13   -1.50    6.20
  -5   1 -13   12.60    6.60
  -5   1 -13    8.40    7.20
   5  -1  13    2.40    5.50
  -6   1 -13   55.39   10.30
  -6   1 -13   42.00    9.30
   6  -1  13   27.30    8.90
  -7   1 -13  108.29   15.30
   7  -1  13   95.69   13.30
   7   1 -14   17.10    7.80
   6   1 -14    5.20    6.70
   5   1 -14  106.09   13.10
  -5  -1  14   95.39   12.50
   4   1 -14  115.09   13.30
   4   1 -14  110.89    9.00
  -4  -1  14   88.79   12.50
   3   1 -14  160.78   14.40
   3   1 -14  147.69    8.40
   3   1 -14  166.48   10.90
  -3  -1  14  160.08   14.10
   2   1 -14  161.78   15.60
   2   1 -14  162.08   11.30
   2   1 -14  166.48   10.20
  -2  -1  14  177.08   15.70
   1   1 -14   59.49   10.30
   1   1 -14   68.79    8.60
   1   1 -14   64.89    9.40
  -1  -1  14   52.89   10.60
   0   1 -14    9.10    7.50
   0   1 -14    8.20    4.90
   0   1 -14    8.70    5.80
   0  -1  14   10.00    7.40
  -1   1 -14   96.49   10.60
  -1   1 -14   88.79   10.10
  -1   1 -14  100.89   13.80
   1  -1  14  116.19   13.30
  -2   1 -14   66.29    9.20
  -2   1 -14   59.49    9.60
  -2   1 -14   62.19   10.90
   2  -1  14   71.29   11.80
  -3   1 -14   87.09   13.20
  -3   1 -14   52.99    8.60
  -3   1 -14   77.39   11.60
   3  -1  14   65.79   11.90
  -4   1 -14  130.59   13.70
  -4   1 -14  125.99   15.00
   4  -1  14  161.48   16.10
  -5   1 -14   49.99   10.70
  -5   1 -14   42.80   10.30
   5  -1  14   45.10    9.90
  -6   1 -14   25.20    8.80
  -6   1 -14   28.00    9.20
   6  -1  14   46.20   10.70
   6   1 -15   -3.70    6.00
   5   1 -15    4.60    7.00
   4   1 -15   17.20    8.20
  -4  -1  15   19.20    7.90
   3   1 -15    1.90    3.10
   3   1 -15  -10.00    5.40
  -3  -1  15    0.50    6.60
   2   1 -15   50.89   11.00
   2   1 -15   56.89    7.30
   2   1 -15   60.29    8.50
  -2  -1  15   46.30    9.60
   1   1 -15   98.09    9.80
   1   1 -15   88.69   12.80
   1   1 -15  131.59   11.30
  -1  -1  15  113.69   14.60
   0   1 -15  113.09   10.70
   0   1 -15  135.79   15.60
   0   1 -15   95.29   11.10
   0  -1  15   93.69   13.90
  -1   1 -15   16.30    8.30
  -1   1 -15    5.10    5.20
  -1   1 -15   11.10    5.90
   1  -1  15    2.00    6.90
  -2   1 -15   96.29   11.10
  -2   1 -15   96.99   11.70
  -2   1 -15   88.39   13.80
   2  -1  15   92.39   13.10
  -3   1 -15   18.00    8.30
  -3   1 -15   10.80    7.10
  -3   1 -15    6.10    6.10
   3  -1  15    1.80    6.20
  -4   1 -15   45.60    9.80
  -4   1 -15   44.00   10.20
   4  -1  15   50.29   11.10
  -5   1 -15   51.39   11.40
  -5   1 -15   25.40    9.30
   5  -1  15   36.80   10.60
   4   1 -16   10.30    7.30
  -4  -1  16  -10.00    6.40
   3   1 -16   18.00    9.20
   3   1 -16    6.20    3.30
  -3  -1  16   22.70    9.70
   2   1 -16    1.70    3.90
   2   1 -16   -6.90    7.10
  -2  -1  16   -4.30    6.50
   1   1 -16   44.30    7.40
   1   1 -16   54.19    8.90
   1   1 -16   60.49   12.40
  -1  -1  16   34.60   10.50
   0   1 -16  104.09   12.10
   0   1 -16  124.19   16.10
   0   1 -16  110.29   11.30
   0  -1  16  107.29   14.50
  -1   1 -16   81.89   11.60
  -1   1 -16  120.09   14.90
  -1   1 -16   86.29   11.00
   1  -1  16   87.99   14.10
  -2   1 -16   18.30    7.00
  -2   1 -16   20.40    7.80
  -2   1 -16   21.60    9.30
   2  -1  16   34.90   10.70
   2   2  16   -0.50    6.40
  -2  -2 -16   16.30    6.60
  -2  -2 -16   14.10    7.10
  -2  -2 -16   30.20    7.50
  -2  -2 -16    7.40    8.60
   1   2  16  218.88   19.30
  -1  -2 -16  204.08   19.30
  -1  -2 -16  216.48   14.70
  -1  -2 -16  193.78   14.60
  -1  -2 -16  192.38   14.60
   0   2  16   -6.20    6.60
   0  -2 -16    1.40    4.70
   0  -2 -16    1.30    7.70
   0  -2 -16    6.70    5.80
  -1   2  16   36.30   10.40
   1  -2 -16   18.80    5.80
   1  -2 -16   10.70    7.90
  -2   2  16   -6.00    6.10
   2  -2 -16   -0.80    3.80
   2  -2 -16    0.70    6.50
  -3   2  16  207.48   18.70
   3  -2 -16  226.68    9.60
   3  -2 -16  258.97   19.20
  -4   2  16   -1.50    5.90
   4  -2 -16   -7.00    6.20
   5   2  15    5.10    7.90
  -5  -2 -15   -0.50    6.50
  -5  -2 -15    2.10    6.30
  -5  -2 -15    8.60    7.10
   4   2  15   82.99   13.30
  -4  -2 -15   88.89   12.50
  -4  -2 -15   54.49   11.40
  -4  -2 -15   85.99   12.80
   3   2  15    9.20    7.10
  -3  -2 -15   17.00    7.90
  -3  -2 -15    3.30    6.00
  -3  -2 -15    4.30    5.80
  -3  -2 -15    3.50    5.40
   2   2  15  229.08   18.00
  -2  -2 -15  176.08   17.80
  -2  -2 -15  207.58   14.90
  -2  -2 -15  194.48   14.90
  -2  -2 -15  193.68   13.90
   1   2  15   24.50    9.10
  -1  -2 -15    7.90    5.50
  -1  -2 -15   12.20    5.70
  -1  -2 -15   11.20    5.90
  -1  -2 -15   20.00    9.10
   0   2  15  231.38   18.50
   0  -2 -15  229.38   13.90
   0  -2 -15  234.38   14.30
   0  -2 -15  201.98   18.30
   0  -2 -15  219.68   13.50
  -1   2  15    7.40    7.20
   1  -2 -15    6.80    7.00
   1  -2 -15   10.20    5.10
   1  -2 -15   12.80    5.10
  -2   2  15   14.60    7.20
   2  -2 -15   16.30    4.50
   2  -2 -15   -2.60    7.00
  -3   2  15    5.60    6.90
   3  -2 -15    2.40    3.00
   3  -2 -15    5.80    6.80
  -4   2  15   84.79   13.20
   4  -2 -15   91.09   13.20
   5  -2 -15    3.10    6.10
   6  -2 -15  167.78   15.80
   6   2  14    1.30    6.50
  -6  -2 -14    3.30    6.70
  -6  -2 -14   -8.10    5.70
  -6  -2 -14   13.60    7.60
   5   2  14   42.10   10.50
  -5  -2 -14   27.40    8.60
  -5  -2 -14   48.20   10.00
  -5  -2 -14   56.49    9.80
   4   2  14    3.10    6.20
  -4  -2 -14    7.90    7.10
  -4  -2 -14    1.70    5.20
  -4  -2 -14    6.60    6.40
   3   2  14    1.70    6.60
  -3  -2 -14    9.50    5.70
  -3  -2 -14   12.50    6.30
  -3  -2 -14    7.70    5.60
  -3  -2 -14   -1.10    5.80
   2   2  14    6.10    6.10
  -2  -2 -14    5.60    5.50
  -2  -2 -14    6.50    5.60
  -2  -2 -14    5.40    7.20
   1   2  14    7.40    7.00
  -1  -2 -14   -8.00    4.00
  -1  -2 -14    3.90    7.10
  -1  -2 -14   -1.10    4.60
   0   2  14   85.89   13.10
   0  -2 -14   76.89    9.50
   0  -2 -14   86.19    9.00
   0  -2 -14  101.09   13.60
   0  -2 -14   75.89    9.30
  -1   2  14  195.18   16.50
   1  -2 -14  181.28   16.30
   1  -2 -14  182.58   11.50
   1  -2 -14  182.58   11.80
   1  -2 -14  169.58   10.80
  -2   2  14    8.10    6.80
   2  -2 -14    4.90    3.60
   2  -2 -14    3.40    6.80
   2  -2 -14    8.50    4.30
   2  -2 -14   11.20    4.20
  -3   2  14   65.29   10.50
   3  -2 -14   73.39   11.30
   3  -2 -14   61.29    5.90
   3  -2 -14   72.79    7.50
  -4   2  14   -0.20    5.80
   4  -2 -14    2.30    5.60
  -5   2  14    3.10    5.70
   5  -2 -14    8.10    6.80
   6  -2 -14   38.50    8.90
   7  -2 -14  103.49   12.50
   7   2  13    2.30    6.50
  -7  -2 -13    3.00    6.90
  -7  -2 -13   16.60    8.90
   6   2  13   95.29   13.30
  -6  -2 -13  102.69   13.30
  -6  -2 -13  105.49   13.30
  -6  -2 -13   99.49   13.20
   5   2  13   25.70    7.80
  -5  -2 -13    3.40    6.00
  -5  -2 -13   14.50    7.70
  -5  -2 -13   11.00    7.10
   4   2  13  206.98   16.00
  -4  -2 -13  209.28   14.20
  -4  -2 -13  177.28   14.60
  -4  -2 -13  164.08   15.60
   3   2  13   20.40    7.40
  -3  -2 -13   18.70    6.40
  -3  -2 -13   10.70    5.50
  -3  -2 -13    8.70    6.70
   2   2  13  119.89   12.80
  -2  -2 -13  129.09   14.10
  -2  -2 -13  114.09   11.20
  -2  -2 -13  115.89   11.10
   1   2  13   74.59   11.50
  -1  -2 -13   64.89    8.70
  -1  -2 -13   76.09   11.60
  -1  -2 -13   62.09    9.10
   0   2  13   23.70    7.80
   0  -2 -13   29.60    6.00
   0  -2 -13   29.50    6.30
   0  -2 -13   39.70    9.10
  -1   2  13    8.90    6.20
   1  -2 -13    7.90    4.10
   1  -2 -13    7.30    4.30
   1  -2 -13    2.20    6.20
  -2   2  13  351.36   20.30
   2  -2 -13  352.76   14.40
   2  -2 -13  335.67   19.70
   2  -2 -13  379.96   15.60
   2  -2 -13  374.36   14.20
  -3   2  13   30.50    8.20
   3  -2 -13   26.10    4.60
   3  -2 -13   21.10    8.00
   3  -2 -13   23.80    4.00
   3  -2 -13   24.30    3.80
  -4   2  13  178.48   14.70
   4  -2 -13  166.18   13.90
   4  -2 -13  179.18    9.10
  -5   2  13   11.40    6.60
   5  -2 -13    1.20    5.80
   6  -2 -13   88.19   12.10
   7  -2 -13   23.10    7.30
   8  -2 -13  155.18   13.60
   9  -2 -13   15.50    6.30
   8   2  12    7.70    6.10
  -8  -2 -12   -2.00    6.70
  -8  -2 -12    2.40    6.80
   7   2  12  153.38   15.00
  -7  -2 -12  125.49   14.80
  -7  -2 -12  146.49   15.10
   6   2  12    5.20    5.80
   6   2  12   13.60    5.90
  -6  -2 -12    7.40    6.40
  -6  -2 -12    3.00    6.60
  -6  -2 -12   -8.20    5.90
   5   2  12  187.28   13.60
   5   2  12  158.88   13.90
  -5  -2 -12  185.28   14.90
  -5  -2 -12  206.68   15.80
   4   2  12   -3.20    3.80
   4   2  12   -1.30    5.10
  -4  -2 -12    9.50    5.50
  -4  -2 -12    0.00    5.40
  -4  -2 -12    9.90    6.60
   3   2  12  182.98   11.70
   3   2  12  189.98   14.60
  -3  -2 -12  197.78   12.90
  -3  -2 -12  169.48   14.20
  -3  -2 -12  178.28   13.50
   2   2  12   39.70    5.70
   2   2  12   36.10    8.20
  -2  -2 -12   33.40    6.90
  -2  -2 -12   48.40    7.40
  -2  -2 -12   37.70    8.80
   1   2  12  377.76   20.20
  -1  -2 -12  364.26   20.20
  -1  -2 -12  335.77   16.30
  -1  -2 -12  340.27   16.00
   0   2  12   58.69    9.90
   0  -2 -12   74.89   11.30
   0  -2 -12   55.49    7.90
   0  -2 -12   54.29    7.70
  -1   2  12   -0.90    4.50
   1  -2 -12   -8.00    3.00
   1  -2 -12    0.80    5.70
   1  -2 -12   -5.20    3.20
  -2   2  12   63.49    9.50
   2  -2 -12   69.89   10.20
   2  -2 -12   64.49    6.80
   2  -2 -12   62.09    6.90
  -3   2  12  151.58   13.10
   3  -2 -12  159.98    9.00
   3  -2 -12  151.88    7.60
   3  -2 -12  154.58    7.40
   3  -2 -12  141.69   13.10
  -4   2  12  124.99   11.90
   4  -2 -12  125.99   11.70
  -5   2  12  210.48   14.40
   5  -2 -12  197.88   14.40
  -6   2  12   10.20    5.40
   6  -2 -12   19.40    6.60
   7  -2 -12    4.50    5.50
   8  -2 -12    2.50    5.40
   9  -2 -12    5.30    5.20
   9   2  11   75.39   11.00
  -9  -2 -11   82.09   13.80
  -9  -2 -11   51.19   11.30
   8   2  11   22.20    7.50
   8   2  11   -4.80    5.10
  -8  -2 -11    9.80    8.00
  -8  -2 -11    4.10    7.30
   7   2  11    2.80    5.50
   7   2  11   -8.70    4.50
  -7  -2 -11    3.50    5.80
  -7  -2 -11    8.80    6.40
  -7  -2 -11    5.20    7.60
   6   2  11   38.00    7.70
   6   2  11   38.40    8.60
  -6  -2 -11   46.50    9.10
  -6  -2 -11   49.10    9.70
   5   2  11    6.40    5.10
   5   2  11   12.30    5.50
  -5  -2 -11    7.00    5.90
  -5  -2 -11    7.00    6.50
   4   2  11   28.00    6.40
   4   2  11   29.10    6.80
  -4  -2 -11   30.00    7.90
  -4  -2 -11   16.60    5.40
  -4  -2 -11   32.40    7.60
   3   2  11   25.00    6.70
   3   2  11   33.90    6.20
  -3  -2 -11   14.40    5.00
  -3  -2 -11   26.90    7.60
  -3  -2 -11   16.90    6.10
   2   2  11   58.09    9.60
   2   2  11   56.99    7.00
  -2  -2 -11   38.00    7.00
  -2  -2 -11   51.49    7.50
  -2  -2 -11   28.30    7.40
   1   2  11    6.90    3.20
   1   2  11    8.30    5.30
  -1  -2 -11   11.20    4.90
  -1  -2 -11    9.90    4.70
  -1  -2 -11    2.90    5.80
   0   2  11  185.18    8.40
   0   2  11  206.68   11.90
   0   2  11  190.78   14.20
   0  -2 -11  187.38   11.20
   0  -2 -11  184.38   11.40
   0  -2 -11  185.58   14.50
  -1   2  11   48.20    8.10
  -1   2  11   57.29    8.30
  -1   2  11   67.49    7.20
   1  -2 -11   54.59    7.30
   1  -2 -11   47.00    6.90
   1  -2 -11   53.59    9.30
  -2   2  11  300.67   12.50
  -2   2  11  294.27   16.90
   2  -2 -11  311.47   12.90
   2  -2 -11  297.97   17.20
   2  -2 -11  292.27   12.30
  -3   2  11   35.30    7.10
  -3   2  11   21.00    4.10
   3  -2 -11   27.60    3.80
   3  -2 -11   26.60    4.40
   3  -2 -11   29.90    3.70
   3  -2 -11   28.10    3.80
   3  -2 -11   15.70    6.20
  -4   2  11   47.60    7.80
  -4   2  11   45.00    5.20
   4  -2 -11   43.70    7.70
  -5   2  11    5.00    4.80
   5  -2 -11   -0.40    4.80
  -6   2  11  491.35   21.30
   6  -2 -11  531.75   22.10
   7  -2 -11   16.10    6.20
   8  -2 -11   85.99    9.80
   9  -2 -11   -3.70    4.30
  10  -2 -11   19.30    5.70
  10   2  10   15.00    6.60
 -10  -2 -10   43.90   10.80
 -10  -2 -10   23.80   10.00
   9   2  10   12.50    6.20
  -9  -2 -10   13.80    8.10
  -9  -2 -10   16.60    8.40
   8   2  10   24.80    7.40
   8   2  10   29.20    7.90
  -8  -2 -10   27.70    8.70
  -8  -2 -10   38.60    9.10
   7   2  10   79.39   11.00
   7   2  10   93.29   10.90
  -7  -2 -10   71.79   10.10
  -7  -2 -10   87.39   12.20
  -7  -2 -10   83.49   11.80
   6   2  10    3.10    4.80
   6   2  10   -4.10    4.60
  -6  -2 -10   -7.40    4.50
  -6  -2 -10   -2.50    4.20
   5   2  10  260.37   16.10
   5   2  10  313.57   16.30
  -5  -2 -10  299.17   16.80
  -5  -2 -10  258.27   15.10
  -5  -2 -10  302.07   14.70
  -5  -2 -10  286.57   16.90
   4   2  10   -2.20    3.80
   4   2  10    6.40    5.00
  -4  -2 -10   -0.80    4.60
  -4  -2 -10   -1.90    4.10
  -4  -2 -10    0.10    4.70
  -4  -2 -10    6.20    4.30
   3   2  10  110.59   11.40
   3   2  10  101.39    9.10
  -3  -2 -10  128.29   11.20
  -3  -2 -10  110.89    9.70
  -3  -2 -10  116.69   11.90
   2   2  10    1.30    4.80
   2   2  10    1.90    3.40
  -2  -2 -10    6.80    4.70
  -2  -2 -10    4.30    5.20
  -2  -2 -10    4.50    4.90
   1   2  10  432.76   19.80
   1   2  10  427.56   15.00
  -1  -2 -10  416.66   17.10
  -1  -2 -10  406.66   19.40
  -1  -2 -10  426.06   16.80
   0   2  10    4.00    2.50
   0   2  10    6.50    4.20
   0   2  10    5.80    5.30
   0   2  10    2.00    3.60
   0  -2 -10    8.50    4.20
   0  -2 -10    7.90    5.30
   0  -2 -10    0.70    3.80
  -1   2  10  210.38   13.30
  -1   2  10  208.28   10.30
  -1   2  10  209.08    7.20
   1  -2 -10  180.08   10.20
   1  -2 -10  181.58   13.60
   1  -2 -10  200.68   10.50
  -2   2  10    5.60    3.00
  -2   2  10   -3.20    3.90
   2  -2 -10   -0.80    4.50
   2  -2 -10   -1.00    3.00
   2  -2 -10    0.40    3.00
  -3   2  10  104.49    6.90
  -3   2  10  113.39   10.70
   3  -2 -10  116.09    7.10
   3  -2 -10  109.19    6.10
   3  -2 -10  110.59   10.90
   3  -2 -10  108.39    5.50
  -4   2  10   43.60    7.10
  -4   2  10   41.30    5.10
   4  -2 -10   60.29    9.00
  -5   2  10  219.58   13.00
  -5   2  10  190.78    8.40
   5  -2 -10  197.58   12.90
   5  -2 -10  225.88   13.10
  -6   2  10   31.20    6.30
   6  -2 -10   23.30    6.00
  -7   2  10  218.38   13.30
   7  -2 -10  254.77   14.10
   8  -2 -10    5.70    5.10
   9  -2 -10  243.28   13.30
  10  -2 -10    1.00    3.80
  11  -2 -10    6.50    3.90
  10   2   9  199.48   14.00
 -10  -2  -9  191.88   16.90
 -10  -2  -9  200.78   17.90
   9   2   9   15.40    7.30
   9   2   9   13.50    6.30
  -9  -2  -9   27.10    8.40
  -9  -2  -9   14.60    7.50
   8   2   9   50.99    8.50
   8   2   9   48.10    9.10
  -8  -2  -9   60.39   10.80
  -8  -2  -9   42.90    9.70
   7   2   9   -7.40    4.50
   7   2   9    3.20    4.80
  -7  -2  -9    0.80    5.80
  -7  -2  -9    1.10    5.40
  -7  -2  -9    5.70    5.10
   6   2   9  150.38   12.10
   6   2   9  165.98   12.90
  -6  -2  -9  187.88   14.30
  -6  -2  -9  177.08   12.70
   5   2   9   65.89    9.30
   5   2   9   74.79    9.80
  -5  -2  -9   73.29    9.60
  -5  -2  -9   78.59    9.90
  -5  -2  -9   94.49    8.70
  -5  -2  -9   83.89    9.80
   4   2   9   68.79    9.50
   4   2   9   54.79    8.20
  -4  -2  -9   48.70    7.10
  -4  -2  -9   47.90    7.90
  -4  -2  -9   43.80    7.80
  -4  -2  -9   57.99    8.00
   3   2   9   24.80    5.10
   3   2   9   15.80    5.40
  -3  -2  -9   28.50    6.50
  -3  -2  -9   21.50    5.10
  -3  -2  -9   31.40    5.80
  -3  -2  -9   28.20    6.50
   2   2   9  514.95   18.30
   2   2   9  567.64   22.50
  -2  -2  -9  521.85   20.30
  -2  -2  -9  547.25   21.90
  -2  -2  -9  552.34   19.00
   1   2   9    0.90    4.10
   1   2   9    1.60    2.70
  -1  -2  -9    5.50    3.90
  -1  -2  -9   -0.30    4.90
  -1  -2  -9   -1.30    4.00
   0   2   9  107.29    9.70
   0   2   9   94.19    5.90
   0   2   9   92.19    8.00
   0   2   9   77.09    7.10
   0  -2  -9  108.39    9.80
   0  -2  -9   88.59    7.80
   0  -2  -9   98.89    7.90
  -1   2   9   -2.80    3.40
  -1   2   9    1.50    1.70
  -1   2   9    4.80    3.10
  -1   2   9    2.40    4.00
   1  -2  -9  -10.90    4.00
   1  -2  -9   -0.20    3.00
   1  -2  -9    0.20    3.10
  -2   2   9   94.79    8.80
  -2   2   9   79.29    6.10
  -2   2   9   83.59    8.30
   2  -2  -9   92.89    6.40
   2  -2  -9   82.09    8.70
   2  -2  -9   76.19    6.30
  -3   2   9  120.29    6.90
  -3   2   9  147.39   11.00
   3  -2  -9  143.19   10.60
   3  -2  -9  144.99    5.80
   3  -2  -9  153.48   11.20
   3  -2  -9  129.59    7.10
   3  -2  -9  138.39    6.20
  -4   2   9  168.08    7.70
  -4   2   9  175.38   11.70
   4  -2  -9  188.58   11.60
   4  -2  -9  187.88   12.10
  -5   2   9    0.40    3.80
  -5   2   9    2.90    2.60
   5  -2  -9    4.00    4.50
   5  -2  -9    3.70    3.90
  -6   2   9   25.10    3.60
  -6   2   9   29.50    5.80
  -6   2   9   27.50    3.80
   6  -2  -9   33.80    6.00
   6  -2  -9   22.10    5.50
  -7   2   9   20.40    4.90
  -7   2   9   11.70    3.00
   7  -2  -9   18.80    5.20
   8  -2  -9  114.79    9.00
   9  -2  -9   11.40    4.40
  10  -2  -9  410.56   15.60
  11  -2  -9    8.80    3.10
  11   2   8    5.50    4.80
 -11  -2  -8   -4.90    7.40
 -11  -2  -8   13.40    9.10
  10   2   8   45.00    9.70
  10   2   8   37.50    7.40
 -10  -2  -8   43.20    9.90
 -10  -2  -8   31.50    9.20
   9   2   8  166.78   15.20
   9   2   8  146.19   11.70
  -9  -2  -8  144.39   15.20
  -9  -2  -8  155.28   15.20
   8   2   8   77.19    9.10
   8   2   8   70.39   10.60
  -8  -2  -8   76.89   11.40
  -8  -2  -8   74.09    9.20
  -8  -2  -8   70.89   10.50
   7   2   8   45.60    7.40
   7   2   8   22.20    6.80
  -7  -2  -8   39.60    7.00
  -7  -2  -8   29.10    7.80
   6   2   8    1.00    4.30
   6   2   8    3.50    4.10
   6   2   8    2.20    4.60
  -6  -2  -8    3.10    4.00
  -6  -2  -8    4.50    5.90
  -6  -2  -8    7.20    5.50
  -6  -2  -8    7.50    4.90
   5   2   8  168.28   12.00
   5   2   8  173.48   12.30
   5   2   8  175.08   12.20
  -5  -2  -8  177.68   10.40
  -5  -2  -8  159.98   12.90
  -5  -2  -8  174.98   12.10
  -5  -2  -8  170.18   12.00
   4   2   8  206.68   12.30
   4   2   8  211.88   13.30
  -4  -2  -8  232.78   13.40
  -4  -2  -8  222.18   11.30
  -4  -2  -8  233.48   13.80
  -4  -2  -8  234.78   12.80
   3   2   8    1.80    3.30
   3   2   8    3.50    4.00
  -3  -2  -8    4.50    4.70
  -3  -2  -8    2.70    4.00
  -3  -2  -8    1.90    3.60
  -3  -2  -8   -2.10    3.30
   2   2   8   26.00    4.40
   2   2   8   24.40    6.20
  -2  -2  -8   22.00    6.20
  -2  -2  -8   20.30    5.30
  -2  -2  -8   29.60    5.10
   1   2   8  650.63   19.30
   1   2   8  608.74   23.10
  -1  -2  -8  660.73   20.20
  -1  -2  -8  606.64   22.80
  -1  -2  -8  631.54   21.00
   0   2   8  252.77    9.10
   0   2   8  218.48   10.70
   0   2   8  266.87   10.90
   0   2   8  242.98   13.40
   0  -2  -8  220.98   12.60
   0  -2  -8  248.38   11.00
   0  -2  -8  246.18   10.80
  -1   2   8  456.75   15.40
  -1   2   8  453.35   18.20
  -1   2   8  437.76   14.50
  -1   2   8  430.16   12.20
   1  -2  -8  417.06   14.50
   1  -2  -8  426.96   17.70
   1  -2  -8  425.16   14.70
  -2   2   8   69.49    6.50
  -2   2   8   68.49    5.20
  -2   2   8   57.49    7.50
   2  -2  -8   66.19    5.30
   2  -2  -8   56.99    6.90
   2  -2  -8   62.79    5.30
   2  -2  -8   62.39    7.40
  -3   2   8  139.09    6.60
  -3   2   8  136.39    9.60
   3  -2  -8  127.29    9.50
   3  -2  -8  132.89    5.00
   3  -2  -8  139.09    9.90
   3  -2  -8  130.39    6.60
   3  -2  -8  132.99    5.40
  -4   2   8   28.90    4.00
  -4   2   8   25.10    2.40
  -4   2   8   23.70    5.40
   4  -2  -8   24.40    5.20
   4  -2  -8   18.80    5.00
  -5   2   8  355.86   15.20
  -5   2   8  361.86   11.80
  -5   2   8  372.16   11.10
   5  -2  -8  349.57   15.60
   5  -2  -8  357.76   15.40
  -6   2   8   38.10    4.70
  -6   2   8   33.60    4.60
  -6   2   8   37.20    5.60
   6  -2  -8   30.50    5.50
   6  -2  -8   33.70    6.00
  -7   2   8   53.49    6.70
  -7   2   8   59.49    5.60
  -7   2   8   73.79    6.20
   7  -2  -8   64.79    7.20
   7  -2  -8   60.49    6.60
  -8   2   8    0.80    3.30
   8  -2  -8   -1.00    3.20
   9  -2  -8   66.29    6.60
  10  -2  -8    1.90    2.80
  11   2   7   13.80    5.20
 -11  -2  -7    6.70    7.60
 -11  -2  -7    6.70    7.30
  10   2   7    6.70    5.90
  10   2   7   12.80    4.90
 -10  -2  -7   15.10    8.00
 -10  -2  -7   13.70    7.70
   9   2   7    7.40    6.30
   9   2   7    3.60    4.30
  -9  -2  -7    1.10    6.60
  -9  -2  -7   -2.30    5.60
   8   2   7  355.76   19.70
   8   2   7  380.66   16.90
  -8  -2  -7  376.96   16.70
  -8  -2  -7  327.17   19.30
  -8  -2  -7  415.26   20.30
   7   2   7    3.60    3.80
   7   2   7   -0.50    4.00
   7   2   7    2.20    5.40
  -7  -2  -7   10.00    6.50
  -7  -2  -7    9.00    4.60
   6   2   7  299.27   15.20
   6   2   7  337.47   15.40
   6   2   7  314.37   16.60
  -6  -2  -7  331.37   16.80
  -6  -2  -7  334.27   17.10
  -6  -2  -7  314.67   15.20
   5   2   7   64.99    8.20
   5   2   7   62.49    7.90
   5   2   7   70.89    8.60
  -5  -2  -7   79.39    8.70
  -5  -2  -7   77.79    7.10
  -5  -2  -7   66.79    9.70
  -5  -2  -7   69.29    8.00
   4   2   7    3.40    3.80
   4   2   7    3.70    3.80
   4   2   7    1.20    3.80
  -4  -2  -7    2.30    3.70
  -4  -2  -7    2.20    4.20
  -4  -2  -7    3.90    3.30
  -4  -2  -7    0.60    4.70
   3   2   7   70.09    7.50
   3   2   7   67.89    7.10
   3   2   7   79.09    7.50
  -3  -2  -7   78.89    8.40
  -3  -2  -7   86.19    7.00
  -3  -2  -7   79.79    8.20
  -3  -2  -7   87.19    7.70
   2   2   7  243.98   12.60
   2   2   7  247.68   10.80
   2   2   7  244.98   12.10
  -2  -2  -7  242.58   10.70
  -2  -2  -7  239.98   11.50
  -2  -2  -7  243.28   12.60
  -2  -2  -7  220.58   10.40
   1   2   7   -2.30    3.10
   1   2   7   -0.70    2.20
   1   2   7   -0.10    3.20
  -1  -2  -7   -0.70    2.80
  -1  -2  -7    3.70    3.90
  -1  -2  -7    1.50    3.00
   0   2   7  117.69    5.70
   0   2   7   97.69    6.50
   0   2   7  106.59    7.00
   0   2   7  102.89    8.70
   0  -2  -7  110.99    8.10
   0  -2  -7  100.39    8.10
   0  -2  -7  115.09    7.10
   0  -2  -7  102.39    6.90
  -1   2   7   30.20    2.90
  -1   2   7   36.70    4.30
  -1   2   7   31.30    4.20
  -1   2   7   23.80    4.90
   1  -2  -7   27.50    5.40
   1  -2  -7   25.30    4.80
   1  -2  -7   38.00    4.50
   1  -2  -7   23.10    3.50
  -2   2   7  221.68    6.40
  -2   2   7  235.68    9.60
  -2   2   7  217.58    8.30
  -2   2   7  217.48   11.40
   2  -2  -7  221.38    8.40
   2  -2  -7  232.88   11.60
   2  -2  -7  230.48    8.40
   2  -2  -7  209.48   11.00
  -3   2   7    0.70    1.10
  -3   2   7    3.30    3.30
  -3   2   7    1.50    2.00
   3  -2  -7    0.60    1.10
   3  -2  -7    2.10    3.20
   3  -2  -7    0.50    1.80
   3  -2  -7    0.00    3.40
   3  -2  -7    0.20    1.00
   3  -2  -7    2.20    1.10
  -4   2   7  178.48    6.50
  -4   2   7  179.28    7.10
  -4   2   7  176.68    9.90
   4  -2  -7  161.48   10.10
   4  -2  -7  194.88   10.10
  -5   2   7    0.80    2.20
  -5   2   7   -2.00    2.00
  -5   2   7   -1.90    2.80
   5  -2  -7   -1.20    2.90
   5  -2  -7    0.70    3.40
  -6   2   7   52.49    6.10
  -6   2   7   58.59    5.10
  -6   2   7   59.29    5.60
   6  -2  -7   52.19    6.20
   6  -2  -7   61.19    6.90
  -7   2   7    3.50    3.20
  -7   2   7   -1.00    2.70
  -7   2   7    1.90    3.00
   7  -2  -7   -0.90    3.10
   7  -2  -7   -1.10    2.80
  -8   2   7  232.68   11.80
  -8   2   7  237.78   10.20
  -8   2   7  228.28   10.30
   8  -2  -7  227.78   10.50
  -9   2   7    9.20    4.50
   9  -2  -7    4.70    2.90
  10  -2  -7   43.70    3.80
  12   2   6    1.00    3.60
 -12  -2  -6   -8.60    6.20
 -12  -2  -6   -2.20    7.00
  11   2   6   33.10    6.00
 -11  -2  -6   41.70    9.80
 -11  -2  -6   34.10    9.10
  10   2   6   47.60    7.30
  10   2   6   52.79   10.60
 -10  -2  -6   78.89   11.70
 -10  -2  -6   45.30   10.20
   9   2   6   86.19    8.40
   9   2   6   62.59   10.20
  -9  -2  -6   88.19   12.30
  -9  -2  -6   89.89   12.20
   8   2   6   -0.80    4.40
   8   2   6    5.50    3.80
   8   2   6   -1.20    3.60
  -8  -2  -6   -2.50    5.40
  -8  -2  -6    3.50    4.00
  -8  -2  -6    6.00    5.50
   7   2   6   34.50    7.10
   7   2   6   42.70    6.60
   7   2   6   37.30    6.10
  -7  -2  -6   32.20    5.70
  -7  -2  -6   29.60    7.00
  -7  -2  -6   40.20    8.50
   6   2   6   11.20    4.30
   6   2   6   14.20    5.40
   6   2   6   24.40    5.40
  -6  -2  -6   10.70    4.40
  -6  -2  -6   19.70    6.70
  -6  -2  -6   13.10    5.50
   5   2   6  280.37   14.30
   5   2   6  290.27   13.70
   5   2   6  296.87   13.70
  -5  -2  -6  317.97   13.90
  -5  -2  -6  312.57   15.50
  -5  -2  -6  311.87   14.80
   4   2   6   10.50    4.20
   4   2   6    8.30    4.30
   4   2   6   11.10    4.10
  -4  -2  -6    9.90    4.10
  -4  -2  -6   15.60    4.50
  -4  -2  -6    7.50    4.60
   3   2   6  823.22   25.60
   3   2   6  871.51   27.00
   3   2   6  851.71   26.40
  -3  -2  -6  862.21   23.70
  -3  -2  -6  838.72   26.50
  -3  -2  -6  863.31   26.60
  -3  -2  -6  887.11   25.90
   2   2   6    7.10    3.00
   2   2   6    6.10    3.30
   2   2   6    5.40    3.60
  -2  -2  -6    3.80    3.70
  -2  -2  -6    4.50    3.50
  -2  -2  -6    3.50    2.80
  -2  -2  -6    0.00    2.70
   1   2   6   16.90    3.90
   1   2   6   13.50    4.40
   1   2   6   16.30    3.00
  -1  -2  -6    7.10    3.70
  -1  -2  -6   23.20    4.40
  -1  -2  -6   12.20    3.40
  -1  -2  -6   11.20    3.00
   0   2   6   13.50    3.00
   0   2   6   12.00    3.90
   0   2   6   23.90    3.30
   0   2   6   17.40    4.00
   0   2   6   19.30    3.20
   0  -2  -6   22.80    4.60
   0  -2  -6   14.00    3.10
   0  -2  -6   19.60    3.60
   0  -2  -6   15.30    4.40
  -1   2   6  160.58    9.00
  -1   2   6  169.88    8.90
  -1   2   6  177.08    7.80
  -1   2   6  171.78    5.90
  -1   2   6  176.18    7.00
   1  -2  -6  167.18    7.40
   1  -2  -6  159.38    9.00
   1  -2  -6  164.68    7.20
   1  -2  -6  160.78    8.90
  -2   2   6   23.40    3.50
  -2   2   6   24.30    3.20
  -2   2   6   21.10    4.40
  -2   2   6   20.10    3.90
   2  -2  -6   28.50    3.40
   2  -2  -6   25.90    4.50
   2  -2  -6   19.30    2.70
   2  -2  -6   19.60    4.50
  -3   2   6 1016.40   25.70
  -3   2   6 1020.20   29.30
  -3   2   6 1017.50   25.10
   3  -2  -6 1007.60   29.30
   3  -2  -6 1050.79   29.60
  -4   2   6    0.20    2.80
  -4   2   6    4.90    2.00
  -4   2   6    3.70    1.90
   4  -2  -6    6.10    3.30
   4  -2  -6    7.30    3.20
  -5   2   6  245.18    8.90
  -5   2   6  241.98   10.40
  -5   2   6  242.38    9.40
   5  -2  -6  251.67   10.70
   5  -2  -6  235.58   10.70
  -6   2   6   45.00    5.20
  -6   2   6   47.70    5.60
  -6   2   6   41.60    4.80
   6  -2  -6   50.79    5.50
   6  -2  -6   39.30    5.50
  -7   2   6  262.27   10.70
  -7   2   6  280.37   12.20
  -7   2   6  297.67   10.90
  -7   2   6  247.88    8.20
   7  -2  -6  273.17   11.00
  -8   2   6    2.10    3.10
  -8   2   6    3.30    3.60
  -8   2   6    3.20    2.40
  -8   2   6    5.60    2.50
   8  -2  -6    1.40    2.50
   8  -2  -6    6.10    2.70
  -9   2   6  692.93   19.60
  -9   2   6  666.63   24.00
   9  -2  -6  691.43   18.70
   9  -2  -6  673.13   18.60
 -10   2   6    2.80    4.50
 -11   2   6   88.89    9.20
  12   2   5   -2.50    3.00
 -12  -2  -5    1.70    7.60
 -12  -2  -5   -2.10    6.80
  11   2   5    8.60    3.80
  11   2   5    0.30    6.30
 -11  -2  -5    6.30    7.50
 -11  -2  -5    2.70    6.50
  10   2   5  127.69    9.00
  10   2   5  173.58   15.30
 -10  -2  -5  121.99   12.90
 -10  -2  -5  147.39   14.70
   9   2   5   17.80    7.30
   9   2   5   22.90    4.80
  -9  -2  -5   13.00    7.10
  -9  -2  -5   15.50    6.90
   8   2   5  139.89    9.40
   8   2   5  146.89   13.10
   8   2   5  149.29    9.20
  -8  -2  -5  160.28   12.70
  -8  -2  -5  157.88   13.30
  -8  -2  -5  154.98    9.30
   7   2   5   -1.20    4.80
   7   2   5   -0.20    3.50
   7   2   5    0.50    3.20
  -7  -2  -5   11.00    5.70
  -7  -2  -5   -3.40    4.40
  -7  -2  -5    1.40    3.40
  -7  -2  -5    5.60    4.90
   6   2   5  110.99    9.80
   6   2   5  115.69    8.30
   6   2   5  119.09    8.40
  -6  -2  -5  129.09   10.10
  -6  -2  -5  112.19   10.70
  -6  -2  -5  123.99    8.20
   5   2   5   25.40    5.50
   5   2   5   31.60    4.90
   5   2   5   22.00    4.70
  -5  -2  -5   21.70    4.40
  -5  -2  -5   28.50    6.20
  -5  -2  -5   26.60    5.40
   4   2   5  406.96   16.00
   4   2   5  404.26   15.50
   4   2   5  400.76   15.30
  -4  -2  -5  418.66   16.10
  -4  -2  -5  416.16   15.40
  -4  -2  -5  434.16   16.70
   3   2   5    2.10    3.30
   3   2   5    3.30    2.70
   3   2   5    1.50    3.00
  -3  -2  -5    4.80    3.20
  -3  -2  -5   -0.60    2.80
  -3  -2  -5    3.50    3.30
  -3  -2  -5    4.60    3.00
   2   2   5 1107.99   30.40
   2   2   5 1179.48   31.90
   2   2   5 1123.89   31.90
  -2  -2  -5 1052.49   31.50
  -2  -2  -5 1142.49   30.50
  -2  -2  -5 1158.88   31.90
  -2  -2  -5 1146.09   28.90
  -2  -2  -5 1121.79   31.10
   1   2   5   86.19    5.50
   1   2   5  100.09    7.40
   1   2   5   96.29    7.00
  -1  -2  -5   95.59    5.90
  -1  -2  -5   89.89    6.50
  -1  -2  -5  104.49    6.30
  -1  -2  -5   89.09    6.80
   0   2   5  204.98    9.90
   0   2   5  202.18    7.30
   0   2   5  204.38    9.40
   0   2   5  205.48    8.00
   0   2   5  208.08    8.20
   0  -2  -5  194.48    8.10
   0  -2  -5  211.58    9.80
   0  -2  -5  219.38    8.30
   0  -2  -5  209.28    9.70
  -1   2   5  540.55   17.60
  -1   2   5  562.14   15.80
  -1   2   5  563.04   15.30
  -1   2   5  563.44   18.10
   1  -2  -5  544.95   15.30
   1  -2  -5  544.25   17.80
   1  -2  -5  567.04   15.50
   1  -2  -5  574.64   18.20
  -2   2   5  575.74   15.30
  -2   2   5  579.84   15.80
  -2   2   5  574.64   18.20
  -2   2   5  575.54   18.00
   2  -2  -5  586.64   15.30
   2  -2  -5  581.74   14.60
   2  -2  -5  570.94   18.20
   2  -2  -5  565.94   18.00
  -3   2   5   79.39    5.90
  -3   2   5   80.99    4.40
  -3   2   5   77.79    4.00
  -3   2   5   72.29    5.90
  -3   2   5   77.59    4.10
   3  -2  -5   78.19    6.10
   3  -2  -5   79.09    6.10
  -4   2   5  302.97   11.20
  -4   2   5  294.17   10.10
  -4   2   5  300.37    9.50
  -4   2   5  311.27   11.40
   4  -2  -5  300.27   11.50
   4  -2  -5  309.97   11.40
  -5   2   5    3.60    2.40
  -5   2   5    2.40    2.30
  -5   2   5    0.90    2.00
  -5   2   5   -0.60    2.10
  -5   2   5    2.50    1.20
   5  -2  -5   -4.20    2.00
   5  -2  -5    3.90    2.40
  -6   2   5   50.49    4.60
  -6   2   5   51.89    3.60
  -6   2   5   50.49    5.80
   6  -2  -5   50.19    5.00
  -7   2   5    2.70    2.10
  -7   2   5    7.30    2.50
  -7   2   5    2.60    3.40
   7  -2  -5    1.30    2.30
   7  -2  -5    5.40    2.50
  -8   2   5  108.29    6.80
  -8   2   5  107.79    4.90
  -8   2   5  115.59    9.30
   8  -2  -5  116.49    5.40
   8  -2  -5  110.09    5.40
  -9   2   5    1.70    3.10
  -9   2   5    0.50    4.00
 -10   2   5  258.77   11.80
 -10   2   5  233.18   14.50
 -11   2   5    2.70    4.50
 -12   2   5  121.29   11.00
 -12  -2  -4   -5.90    6.30
 -12  -2  -4   16.60    7.60
  11   2   4    0.70    2.60
  11   2   4    3.50    5.60
 -11  -2  -4  -11.20    5.10
 -11  -2  -4   -1.60    6.00
  10   2   4   14.50    6.40
  10   2   4   14.10    3.80
 -10  -2  -4   18.50    7.20
 -10  -2  -4   14.90    6.90
   9   2   4  350.46   13.80
   9   2   4  375.76   20.00
  -9  -2  -4  368.06   19.50
  -9  -2  -4  354.56   18.70
   8   2   4    0.10    4.90
   8   2   4    3.90    3.00
   8   2   4    6.70    3.40
  -8  -2  -4    1.20    5.60
  -8  -2  -4    0.30    4.80
  -8  -2  -4    7.20    3.40
   7   2   4   42.80    7.60
   7   2   4   62.69    6.10
   7   2   4   49.90    6.30
  -7  -2  -4   56.99    6.00
  -7  -2  -4   59.39    8.60
  -7  -2  -4   52.59    7.70
  -7  -2  -4   42.30    7.40
   6   2   4    1.80    3.90
   6   2   4    1.60    2.70
   6   2   4   -1.60    2.80
  -6  -2  -4    0.90    4.40
  -6  -2  -4   -5.30    3.50
  -6  -2  -4    4.00    3.00
   5   2   4   -2.90    3.30
   5   2   4    0.40    2.50
   5   2   4   -0.80    2.80
  -5  -2  -4   -0.20    2.60
  -5  -2  -4    2.00    3.50
  -5  -2  -4    4.80    3.90
   4   2   4   -1.80    2.70
   4   2   4   -0.60    2.60
   4   2   4   -1.10    3.10
  -4  -2  -4    6.00    3.90
  -4  -2  -4   -1.30    2.80
  -4  -2  -4    2.00    2.50
  -4  -2  -4    1.30    2.80
   3   2   4  500.65   17.10
   3   2   4  537.95   17.10
   3   2   4  538.55   16.90
  -3  -2  -4  483.55   16.50
  -3  -2  -4  501.95   17.00
  -3  -2  -4  536.65   16.90
  -3  -2  -4  520.45   17.50
   2   2   4    2.00    3.00
   2   2   4   -0.10    2.40
   2   2   4   -0.10    2.40
  -2  -2  -4   -1.40    2.40
  -2  -2  -4    2.40    2.30
  -2  -2  -4   -4.90    2.20
  -2  -2  -4    1.40    2.70
   1   2   4    0.40    2.40
   1   2   4   -0.30    2.50
   1   2   4   -0.20    2.10
  -1  -2  -4    1.40    2.90
  -1  -2  -4   -1.50    2.40
  -1  -2  -4    0.80    2.10
  -1  -2  -4    0.80    2.70
  -1  -2  -4    0.70    2.10
   0   2   4   11.50    3.50
   0   2   4   11.40    2.00
   0   2   4   17.70    2.70
   0   2   4   14.70    2.90
   0   2   4   12.10    3.10
   0  -2  -4   11.80    2.60
   0  -2  -4    9.60    2.50
   0  -2  -4   10.30    3.10
   0  -2  -4   10.60    3.20
  -1   2   4  325.27   11.40
  -1   2   4  319.47    9.10
  -1   2   4  308.47    9.60
  -1   2   4  307.97   11.40
   1  -2  -4  303.27   11.30
   1  -2  -4  317.47   11.40
   1  -2  -4  307.17    9.10
   1  -2  -4  307.37    9.30
  -2   2   4   63.39    3.90
  -2   2   4   63.89    5.00
  -2   2   4   79.39    5.40
  -2   2   4   68.49    3.30
   2  -2  -4   70.09    3.30
   2  -2  -4   69.99    5.30
   2  -2  -4   65.79    5.20
   2  -2  -4   65.99    2.50
   2  -2  -4   65.29    2.60
  -3   2   4   63.49    4.10
  -3   2   4   57.19    3.40
  -3   2   4   63.99    3.10
  -3   2   4   60.29    4.70
  -3   2   4   53.09    4.50
   3  -2  -4   66.09    5.00
   3  -2  -4   56.99    4.90
  -4   2   4   -0.10    1.90
  -4   2   4    3.90    2.10
  -4   2   4    1.40    2.00
  -4   2   4   -0.70    1.60
  -4   2   4    3.10    1.10
   4  -2  -4    2.80    2.10
   4  -2  -4    1.70    2.30
  -5   2   4  103.09    5.30
  -5   2   4   97.49    5.20
  -5   2   4   98.39    6.40
  -5   2   4   97.49    4.50
   5  -2  -4   92.39    5.30
  -6   2   4   21.10    3.10
  -6   2   4   11.00    3.70
  -6   2   4   14.60    2.40
  -6   2   4   19.10    3.00
   6  -2  -4   16.00    2.60
   6  -2  -4   19.30    2.70
  -7   2   4  395.36   10.90
  -7   2   4  398.76   15.90
  -7   2   4  402.46   13.30
  -7   2   4  397.46   10.90
   7  -2  -4  397.16   11.30
   7  -2  -4  397.36   11.40
  -8   2   4  176.18    9.20
  -8   2   4  199.48   11.60
  -9   2   4   21.20    5.60
  -9   2   4   21.40    4.50
 -10   2   4   10.10    4.40
 -11   2   4  195.38   12.70
 -11   2   4  179.48   11.50
 -12   2   4    3.50    5.30
 -13   2   4  289.97   18.30
 -13  -2  -3   10.00    7.80
 -13  -2  -3    4.90    7.50
 -12  -2  -3  134.19   14.80
 -12  -2  -3  103.09   13.90
  11   2   3    2.30    5.40
  11   2   3    9.60    2.30
 -11  -2  -3   17.40    7.80
 -11  -2  -3    1.70    6.20
  10   2   3   41.60    4.70
  10   2   3   44.80    9.30
 -10  -2  -3   49.20    9.40
 -10  -2  -3   43.10    8.50
   9   2   3   16.30    3.20
   9   2   3    3.10    5.40
   9   2   3    7.00    2.90
  -9  -2  -3    8.10    6.00
  -9  -2  -3   11.20    3.00
  -9  -2  -3    8.40    6.10
   8   2   3    6.00    5.40
   8   2   3    3.30    2.80
  -8  -2  -3    2.50    2.70
  -8  -2  -3    8.40    5.50
  -8  -2  -3   13.00    5.60
   7   2   3   10.90    3.30
   7   2   3    6.20    5.00
  -7  -2  -3    8.80    2.90
  -7  -2  -3   13.50    5.70
  -7  -2  -3    8.30    5.20
  -7  -2  -3    6.90    4.60
   6   2   3  515.75   20.10
   6   2   3  513.35   16.50
   6   2   3  525.55   16.40
  -6  -2  -3  512.15   16.30
  -6  -2  -3  526.15   19.80
  -6  -2  -3  503.85   19.30
   5   2   3   45.40    6.80
   5   2   3   52.09    4.90
   5   2   3   54.39    5.20
  -5  -2  -3   45.80    6.70
  -5  -2  -3   57.39    4.90
  -5  -2  -3   52.59    4.90
   4   2   3 1309.17   35.60
   4   2   3 1350.86   37.20
   4   2   3 1398.66   35.70
  -4  -2  -3 1333.37   35.40
  -4  -2  -3 1419.26   35.70
  -4  -2  -3 1359.76   37.20
   3   2   3   32.40    4.80
   3   2   3   33.60    4.20
   3   2   3   28.60    4.30
  -3  -2  -3   37.60    4.20
  -3  -2  -3   28.60    4.20
  -3  -2  -3   20.70    3.80
   2   2   3  164.28    7.90
   2   2   3  174.08    7.80
   2   2   3  181.58    8.00
  -2  -2  -3  167.78    7.90
  -2  -2  -3  161.48    7.70
  -2  -2  -3  180.48    7.80
   1   2   3   31.70    4.30
   1   2   3   30.00    4.00
   1   2   3   38.00    4.70
  -1  -2  -3   30.80    3.90
  -1  -2  -3   36.80    5.00
  -1  -2  -3   39.10    4.30
  -1  -2  -3   36.50    4.40
   0   2   3 1500.85   35.30
   0   2   3 1524.25   38.00
   0   2   3 1539.95   38.20
   0   2   3 1524.25   36.30
   0  -2  -3 1430.76   37.90
   0  -2  -3 1511.15   35.20
   0  -2  -3 1542.15   38.10
   0  -2  -3 1495.05   36.30
  -1   2   3   53.59    4.80
  -1   2   3   46.50    4.50
  -1   2   3   53.69    2.80
  -1   2   3   52.99    3.60
   1  -2  -3   52.19    4.60
   1  -2  -3   51.59    4.40
   1  -2  -3   53.09    3.00
   1  -2  -3   51.19    3.40
  -2   2   3 3633.14   87.39
  -2   2   3 3685.93   87.59
  -2   2   3 3741.83   84.99
  -2   2   3 3750.12   81.79
   2  -2  -3 3759.42   87.69
   2  -2  -3 3624.54   87.49
  -3   2   3  255.77    8.50
  -3   2   3  246.98    8.30
  -3   2   3  246.18    6.50
  -3   2   3  244.78    8.60
   3  -2  -3  243.68    8.40
   3  -2  -3  247.48    8.50
  -4   2   3   16.50    2.30
  -4   2   3   24.60    2.70
  -4   2   3   12.80    2.30
  -4   2   3   14.80    3.00
   4  -2  -3   18.20    2.50
   4  -2  -3   16.80    2.40
  -5   2   3  121.99    4.90
  -5   2   3  127.09    5.00
  -5   2   3  124.79    7.50
  -5   2   3  126.29    5.90
   5  -2  -3  132.69    5.20
   5  -2  -3  127.19    5.20
  -6   2   3  563.14   14.30
  -6   2   3  556.54   19.10
  -6   2   3  597.34   17.20
  -6   2   3  582.14   14.30
   6  -2  -3  566.04   14.70
   6  -2  -3  585.44   14.80
  -7   2   3  103.69    8.40
  -7   2   3   95.09    6.90
  -8   2   3  654.73   23.30
  -8   2   3  651.63   20.90
  -9   2   3   79.59    8.00
  -9   2   3   59.89    8.90
 -10   2   3   12.40    5.40
 -10   2   3   25.60    5.40
 -11   2   3    5.90    5.10
 -11   2   3   12.10    5.30
 -12   2   3  170.58   12.50
 -12   2   3  152.48   13.20
 -13   2   3   -5.60    5.30
 -13  -2  -2   27.50    9.20
 -13  -2  -2   35.10   10.00
 -12  -2  -2   15.70    8.10
 -12  -2  -2   15.50    7.50
  11   2   2  121.09   13.50
 -11  -2  -2  121.99   13.20
 -11  -2  -2  116.59   13.10
  10   2   2   18.20    6.60
  10   2   2   16.90    2.30
  10   2   2   17.50    2.50
 -10  -2  -2   21.50    7.10
 -10  -2  -2    7.30    6.30
   9   2   2  291.27   10.10
   9   2   2  252.57   16.10
   9   2   2  294.77    9.90
  -9  -2  -2  290.87   16.50
  -9  -2  -2  303.97    9.50
  -9  -2  -2  298.47   16.90
   8   2   2    2.20    5.20
   8   2   2    2.30    2.10
   8   2   2   -1.80    2.20
  -8  -2  -2    0.40    4.70
  -8  -2  -2    1.50    2.20
  -8  -2  -2   -0.10    4.20
   7   2   2   74.49    5.30
   7   2   2   79.29    9.30
   7   2   2   81.99    5.20
  -7  -2  -2   70.59    5.00
  -7  -2  -2   80.09    9.20
  -7  -2  -2   82.89    9.00
   6   2   2   -0.10    0.60
   6   2   2    9.20    2.60
   6   2   2    1.70    3.90
  -6  -2  -2    6.40    2.30
  -6  -2  -2    4.20    3.90
  -6  -2  -2    0.90    3.80
  -6  -2  -2    3.30    2.20
   5   2   2 1158.68   30.20
   5   2   2 1152.28   33.40
   5   2   2 1136.09   30.00
  -5  -2  -2 1144.79   32.80
  -5  -2  -2 1174.98   30.00
  -5  -2  -2 1183.98   30.10
  -5  -2  -2 1157.78   33.30
   4   2   2   57.09    4.50
   4   2   2   53.99    4.20
   4   2   2   53.99    5.70
  -4  -2  -2   59.89    4.50
  -4  -2  -2   55.89    4.30
  -4  -2  -2   52.09    6.00
   3   2   2  433.16   14.70
   3   2   2  465.15   13.60
   3   2   2  446.96   13.60
  -3  -2  -2  455.85   13.50
  -3  -2  -2  445.46   13.50
  -3  -2  -2  457.95   15.00
   2   2   2 1853.41   45.10
   2   2   2 1847.62   45.30
   2   2   2 1866.21   45.10
  -2  -2  -2 1777.02   44.90
  -2  -2  -2 1830.72   45.00
  -2  -2  -2 1864.51   45.30
   1   2   2   13.30    2.30
   1   2   2   10.90    2.20
   1   2   2   11.80    2.40
  -1  -2  -2   18.80    2.70
  -1  -2  -2   14.30    2.40
  -1  -2  -2   11.70    2.30
   0   2   2   71.09    4.20
   0   2   2   68.09    3.30
   0   2   2   62.79    3.90
   0  -2  -2   71.99    4.00
   0  -2  -2   64.39    3.00
   0  -2  -2   68.49    3.40
   0  -2  -2   70.89    4.00
   0  -2  -2   64.79    3.10
  -1   2   2   62.99    3.70
  -1   2   2   64.29    3.70
  -1   2   2   71.09    2.80
   1  -2  -2   67.89    2.50
   1  -2  -2   67.79    3.90
   1  -2  -2   67.59    3.80
   1  -2  -2   68.59    2.50
  -2   2   2  211.88    6.90
  -2   2   2  204.18    6.90
   2  -2  -2  213.58    7.10
  -3   2   2    2.40    1.50
  -3   2   2    1.10    2.20
  -3   2   2    2.40    1.40
   3  -2  -2    2.60    1.50
   3  -2  -2    0.90    1.40
  -4   2   2   17.90    2.50
  -4   2   2   19.40    1.90
  -4   2   2   23.00    2.00
  -4   2   2   20.40    3.60
   4  -2  -2   16.70    2.00
   4  -2  -2   23.70    2.10
  -5   2   2  428.56   13.60
  -5   2   2  456.55   15.50
  -6   2   2   42.40    5.90
  -6   2   2   36.50    4.80
  -7   2   2  160.38   10.40
  -7   2   2  168.38    9.10
  -8   2   2   12.70    4.30
  -8   2   2   15.90    5.00
  -9   2   2  138.59   10.40
  -9   2   2  138.69    9.80
  -9   2   2  107.29   10.60
 -10   2   2   29.80    6.10
 -10   2   2   29.40    6.60
 -11   2   2   67.89   10.00
 -11   2   2   73.79    9.50
 -12   2   2   16.00    6.60
 -12   2   2    7.50    5.80
 -13   2   2    1.60    5.50
 -13   2   2   -3.20    5.80
 -13  -2  -1   11.30    7.30
 -13  -2  -1    9.50    7.30
 -12  -2  -1   -2.40    6.00
 -12  -2  -1    4.10    6.60
 -11  -2  -1   -0.30    6.00
 -11  -2  -1    5.50    6.10
  10   2   1  296.37   18.20
 -10  -2  -1  309.67   17.40
   9   2   1    1.00    4.50
  -9  -2  -1    4.60    5.10
   8   2   1    3.10    1.80
   8   2   1    6.70    2.00
   8   2   1   -1.70    4.70
  -8  -2  -1   -0.60    1.40
  -8  -2  -1    5.30    1.70
  -8  -2  -1   -3.90    4.30
  -8  -2  -1   -5.50    4.10
   7   2   1    6.50    4.50
   7   2   1    7.00    2.10
   7   2   1    8.30    2.10
  -7  -2  -1    6.80    1.90
  -7  -2  -1   10.70    4.90
  -7  -2  -1    5.50    2.00
  -7  -2  -1    3.40    4.50
   6   2   1   74.59    4.40
   6   2   1   79.49    7.90
   6   2   1   65.69    4.20
  -6  -2  -1   71.29    7.50
  -6  -2  -1   67.09    7.60
  -6  -2  -1   68.79    4.10
  -6  -2  -1   75.19    4.20
   5   2   1   43.20    6.40
   5   2   1   43.70    3.70
   5   2   1   49.30    3.50
  -5  -2  -1   41.30    3.40
  -5  -2  -1   46.80    3.50
  -5  -2  -1   35.80    5.40
  -5  -2  -1   39.70    5.60
   4   2   1  572.54   16.00
   4   2   1  601.64   18.90
  -4  -2  -1  583.74   18.30
  -4  -2  -1  591.24   15.80
  -4  -2  -1  572.14   15.80
  -4  -2  -1  618.94   18.90
   3   2   1    0.80    1.80
   3   2   1    0.80    2.80
   3   2   1   -0.10    1.00
  -3  -2  -1    0.90    1.80
  -3  -2  -1    4.50    2.70
  -3  -2  -1   -1.50    1.60
  -3  -2  -1    2.00    2.80
   2   2   1  651.03   16.90
   2   2   1  641.94   16.80
   2   2   1  642.14   17.80
  -2  -2  -1  631.24   17.70
  -2  -2  -1  653.43   17.70
  -2  -2  -1  630.14   16.80
  -2  -2  -1  643.14   16.80
   1   2   1  249.38    7.80
   1   2   1  274.77    8.10
   1   2   1  264.67    7.90
  -1  -2  -1  269.37    8.00
  -1  -2  -1  255.97    7.80
  -1  -2  -1  261.77    7.80
  -1  -2  -1  268.07    8.10
   0   2   1 1599.74   36.10
   0   2   1 1674.03   37.40
   0  -2  -1 1426.96   37.10
  -1   2   1  631.84   14.80
  -1   2   1  634.74   15.70
  -1   2   1  633.84   15.70
  -1   2   1  630.04   14.80
   1  -2  -1  633.44   15.70
  -2   2   1   49.80    2.30
  -2   2   1   48.00    2.40
   2  -2  -1   50.99    2.50
   2  -2  -1   52.89    2.40
  -3   2   1   30.10    4.30
  -3   2   1   30.90    1.40
   3  -2  -1   31.70    1.60
   3  -2  -1   32.20    1.70
  -4   2   1   73.49    5.80
  -5   2   1    0.90    2.70
  -6   2   1  815.22   25.50
  -7   2   1   75.69    8.10
  -7   2   1   59.19    6.80
  -8   2   1    3.70    4.40
  -8   2   1   -1.10    3.80
  -8   2   1    3.50    4.30
  -9   2   1   24.40    6.30
  -9   2   1   26.90    5.90
  -9   2   1   29.40    6.40
 -10   2   1  447.46   19.90
 -10   2   1  479.65   20.00
 -11   2   1   -3.30    4.70
 -11   2   1    0.40    5.00
 -12   2   1  329.67   18.50
 -12   2   1  328.77   18.10
 -13   2   1   42.20    8.80
 -13   2   1   34.60    8.90
 -13  -2   0   64.19   11.20
 -13  -2   0   71.59   10.90
 -12  -2   0   20.70    7.40
 -12  -2   0   15.60    7.10
 -11  -2   0  118.39   12.20
 -11  -2   0  124.59   12.70
  10   2   0    3.10    5.00
 -10  -2   0    9.70    5.60
   9   2   0    3.30    5.40
  -9  -2   0    2.00    4.90
   8   2   0   16.10    5.70
  -8  -2   0   13.60    5.70
  -8  -2   0   28.30    6.10
   7   2   0  713.23   18.40
   7   2   0  710.53   18.30
   7   2   0  702.93   25.00
  -7  -2   0  717.33   17.80
  -7  -2   0  718.93   17.80
  -7  -2   0  761.62   24.20
  -7  -2   0  761.02   25.20
   6   2   0  166.88   10.40
   6   2   0  182.38    6.10
   6   2   0  171.58    6.20
  -6  -2   0  180.28    5.90
  -6  -2   0  184.88    5.90
  -6  -2   0  171.98   10.30
  -6  -2   0  172.98    9.90
   5   2   0  640.84   16.60
   5   2   0  645.94   16.70
   5   2   0  643.04   20.70
  -5  -2   0  621.44   19.80
  -5  -2   0  634.64   16.50
  -5  -2   0  655.93   20.70
  -5  -2   0  633.34   16.40
   4   2   0   11.80    3.20
   4   2   0   11.00    1.80
   4   2   0    9.10    1.80
  -4  -2   0    9.10    3.30
  -4  -2   0    6.70    2.80
  -4  -2   0   10.70    1.70
  -4  -2   0   10.30    1.80
   3   2   0   28.70    3.80
   3   2   0   30.00    2.80
  -3  -2   0   33.40    2.70
  -3  -2   0   32.60    2.70
  -3  -2   0   34.90    4.40
  -3  -2   0   24.30    3.80
   2   2   0    0.20    2.00
   2   2   0    2.00    1.70
   2   2   0    1.10    1.30
  -2  -2   0    4.60    2.00
  -2  -2   0    6.80    1.40
  -2  -2   0    5.90    2.20
  -2  -2   0    5.80    1.40
   1   2   0 4653.13  107.59
   1   2   0 4439.56  108.29
   1   2   0 4424.06  108.09
  -1  -2   0 4857.91  109.69
  -1  -2   0 4738.33  109.29
  -1  -2   0 4734.93  105.59
  -1   2   0 4775.62  108.79
  -1   2   0 4791.82  108.49
  -1   2   0 4769.32  109.19
   1  -2   0 4280.17  108.69
  -2   2   0    3.30    1.70
  -2   2   0    5.60    2.20
  -2   2   0    1.90    0.80
  -2   2   0    2.30    0.80
   2  -2   0    3.60    0.90
   2  -2   0    2.60    0.80
  -3   2   0   33.40    1.50
  -3   2   0   27.60    4.20
  -3   2   0   28.80    3.70
   3  -2   0   26.90    1.60
   3  -2   0   27.00    1.60
  -4   2   0   11.20    3.10
  -5   2   0  600.54   19.70
  -6   2   0  163.78    9.50
  -6   2   0  198.68   10.70
  -7   2   0  702.93   23.60
  -7   2   0  722.03   24.60
  -8   2   0   33.00    6.10
  -8   2   0   43.20    6.80
  -8   2   0   31.70    6.30
  -9   2   0    7.10    5.40
  -9   2   0   12.70    5.30
 -10   2   0    3.20    5.30
 -10   2   0   12.40    5.60
 -11   2   0   99.79   11.50
 -11   2   0  134.99   12.20
 -12   2   0   14.00    6.90
 -12   2   0    8.70    6.70
 -13   2   0   50.29    9.90
 -13   2   0   60.89   10.40
 -13  -2   1   41.40    9.30
 -13  -2   1   31.60    8.60
 -12  -2   1  393.76   20.70
 -12  -2   1  355.36   19.40
 -11  -2   1   -4.70    4.80
  10   2  -1  441.96   21.30
 -10  -2   1  450.45   19.80
   9   2  -1   20.10    6.60
  -9  -2   1   27.80    6.40
  -9  -2   1   40.10    7.80
   8   2  -1   -3.50    4.00
  -8  -2   1   -6.80    3.60
  -8  -2   1    4.40    4.60
   7   2  -1   56.39    7.70
   7   2  -1   63.19    2.80
  -7  -2   1   56.19    7.60
  -7  -2   1   70.39    7.30
   6   2  -1  798.52   19.70
   6   2  -1  751.22   19.70
   6   2  -1  826.82   25.40
  -6  -2   1  804.72   24.00
  -6  -2   1  783.02   19.30
  -6  -2   1  809.92   19.40
  -6  -2   1  762.22   24.60
   5   2  -1    0.50    1.30
   5   2  -1   -1.70    1.20
   5   2  -1    2.30    3.00
  -5  -2   1   -1.10    1.10
  -5  -2   1   -2.00    2.50
  -5  -2   1    1.30    2.80
  -5  -2   1   -1.20    1.20
   4   2  -1   73.99    6.00
   4   2  -1   79.39    3.70
   4   2  -1   78.29    3.60
  -4  -2   1   77.49    3.50
  -4  -2   1   72.09    5.40
  -4  -2   1   80.59    5.90
  -4  -2   1   73.09    3.50
   3   2  -1   36.70    4.40
   3   2  -1   33.90    2.60
   3   2  -1   34.70    3.80
   3   2  -1   32.10    2.80
  -3  -2   1   33.50    4.40
  -3  -2   1   38.00    2.80
  -3  -2   1   42.60    4.20
  -3  -2   1   35.30    2.70
   2   2  -1   48.20    3.00
   2   2  -1   49.30    3.60
   2   2  -1   48.40    3.40
  -2  -2   1   45.90    2.90
  -2  -2   1   46.70    3.30
  -2  -2   1   47.90    2.90
  -2  -2   1   51.09    3.70
   1   2  -1  630.84   15.60
   1   2  -1  639.74   15.20
  -1  -2   1  618.14   14.10
  -1  -2   1  607.14   15.20
  -1  -2   1  617.84   15.60
  -1  -2   1  581.84   15.40
  -1  -2   1  598.74   15.50
   0   2  -1 1583.74   36.60
   0  -2   1 1494.15   36.50
  -1   2  -1  281.97    7.90
  -1   2  -1  281.97    7.90
  -1   2  -1  277.77    6.80
  -1   2  -1  277.37    8.30
   1  -2   1  273.87    7.90
   1  -2   1  280.47    8.30
  -2   2  -1  653.53   17.80
  -2   2  -1  662.23   16.60
  -2   2  -1  637.74   17.90
  -2   2  -1  650.53   16.60
   2  -2   1  659.73   17.90
   2  -2   1  647.94   16.60
  -3   2  -1   -1.20    2.60
  -3   2  -1   -2.80    2.80
  -3   2  -1    3.00    1.40
  -3   2  -1   -0.10    1.30
   3  -2   1    1.30    1.40
   3  -2   1    0.30    1.30
   3  -2   1    3.00    2.70
  -4   2  -1  596.04   15.40
  -4   2  -1  599.04   18.60
  -4   2  -1  599.14   15.30
  -4   2  -1  609.14   19.00
   4  -2   1  611.54   15.60
   4  -2   1  581.04   19.00
   4  -2   1  592.14   15.50
  -5   2  -1   42.50    6.00
  -5   2  -1   41.70    2.80
  -5   2  -1   41.80    2.70
  -5   2  -1   41.40    5.40
   5  -2   1   39.20    5.70
   5  -2   1   42.40    2.90
   5  -2   1   44.90    3.00
  -6   2  -1   79.19    7.80
  -6   2  -1   78.99    7.60
  -6   2  -1   77.29    3.20
  -6   2  -1   77.29    3.20
   6  -2   1   62.49    7.10
   6  -2   1   74.09    3.50
   6  -2   1   79.89    3.50
  -7   2  -1    5.30    4.40
  -7   2  -1    5.80    4.20
  -8   2  -1    3.70    4.40
  -8   2  -1   -1.10    4.30
  -9   2  -1   -8.50    4.20
  -9   2  -1    2.70    5.10
 -10   2  -1  280.27   16.40
 -10   2  -1  302.27   17.10
 -11   2  -1   -1.80    5.70
 -11   2  -1   13.90    6.40
 -12   2  -1   13.90    7.30
 -12   2  -1   15.50    7.10
 -13   2  -1   -7.60    6.70
 -13   2  -1   -1.20    6.40
 -13  -2   2    2.10    6.40
 -13  -2   2   -3.90    5.60
 -12  -2   2    9.40    6.40
 -11  -2   2   51.79    8.20
 -10  -2   2   28.10    6.20
   9   2  -2  136.49   11.60
  -9  -2   2  122.39   10.90
  -9  -2   2  119.09   10.10
   8   2  -2   10.50    5.60
  -8  -2   2   25.30    5.80
  -8  -2   2   20.70    5.20
   7   2  -2  139.09   10.10
   7   2  -2  152.18    5.00
   7   2  -2  146.19    5.00
  -7  -2   2  132.29    8.90
  -7  -2   2  156.98   10.20
   6   2  -2   36.30    2.90
   6   2  -2   33.50    2.80
   6   2  -2   28.80    5.00
  -6  -2   2   43.90    6.00
  -6  -2   2   29.00    2.60
  -6  -2   2   31.40    2.60
  -6  -2   2   35.60    5.30
   5   2  -2  437.56   12.50
   5   2  -2  453.15   12.50
   5   2  -2  451.35   15.60
  -5  -2   2  454.65   12.30
  -5  -2   2  442.26   15.40
  -5  -2   2  457.25   14.60
  -5  -2   2  449.26   12.30
   4   2  -2   19.00    2.80
   4   2  -2   10.30    2.80
   4   2  -2   17.00    2.70
   4   2  -2   20.20    2.50
  -4  -2   2   16.80    2.60
  -4  -2   2   20.40    2.70
  -4  -2   2   19.40    2.90
  -4  -2   2   21.60    3.30
   3   2  -2    0.40    0.80
   3   2  -2    1.80    1.70
   3   2  -2    0.20    1.70
   3   2  -2    4.30    2.10
  -3  -2   2    5.10    1.70
  -3  -2   2    3.20    1.90
  -3  -2   2    2.60    1.70
  -3  -2   2    3.40    2.10
   2   2  -2  213.98    7.00
   2   2  -2  212.98    7.30
   2   2  -2  211.78    7.40
   2   2  -2  229.58    7.00
  -2  -2   2  210.28    7.30
  -2  -2   2  219.48    7.30
  -2  -2   2  215.28    7.00
  -2  -2   2  210.18    7.50
  -2  -2   2  219.28    7.00
   1   2  -2   67.49    2.90
   1   2  -2   69.29    3.90
   1   2  -2   69.69    3.80
   1   2  -2   69.59    4.00
   1   2  -2   65.19    3.20
  -1  -2   2   68.79    3.70
  -1  -2   2   68.79    3.80
  -1  -2   2   66.99    3.00
  -1  -2   2   64.99    3.20
  -1  -2   2   74.69    3.90
   0   2  -2   55.79    3.60
   0   2  -2   65.59    3.20
   0   2  -2   62.89    3.50
   0   2  -2   63.99    3.70
   0  -2   2   60.89    3.70
   0  -2   2   59.09    3.70
   0  -2   2   61.29    3.60
  -1   2  -2   15.50    2.70
  -1   2  -2   18.20    2.40
  -1   2  -2   20.60    3.00
  -1   2  -2   23.40    3.20
  -1   2  -2   14.90    1.90
   1  -2   2   22.80    2.30
   1  -2   2   19.30    3.00
   1  -2   2   14.40    2.30
   1  -2   2   19.90    3.00
  -2   2  -2 1873.41   45.40
  -2   2  -2 1811.72   45.60
  -2   2  -2 1918.01   45.00
  -2   2  -2 1836.02   44.90
   2  -2   2 1750.62   45.20
   2  -2   2 1891.21   44.90
   2  -2   2 1884.61   45.70
   2  -2   2 1811.92   44.90
  -3   2  -2  473.05   15.40
  -3   2  -2  467.85   15.30
  -3   2  -2  473.85   13.50
  -3   2  -2  463.85   13.40
   3  -2   2  474.55   13.60
   3  -2   2  473.65   15.60
   3  -2   2  467.05   13.60
  -4   2  -2   63.59    6.30
  -4   2  -2   60.19    4.10
  -4   2  -2   63.89    6.30
  -4   2  -2   57.49    4.00
   4  -2   2   55.69    4.00
   4  -2   2   56.59    6.40
  -5   2  -2 1135.59   33.40
  -5   2  -2 1160.38   29.70
  -5   2  -2 1181.78   33.50
  -5   2  -2 1155.48   29.60
   5  -2   2 1188.48   29.90
   5  -2   2 1229.08   34.20
  -6   2  -2    4.00    3.90
  -6   2  -2    4.90    1.90
  -6   2  -2    3.80    2.00
  -6   2  -2    1.60    3.40
   6  -2   2    1.50    1.90
   6  -2   2   -1.10    3.50
   6  -2   2    5.30    2.10
  -7   2  -2   76.19    4.40
  -7   2  -2   85.59    9.20
  -7   2  -2   75.59    4.40
  -7   2  -2   69.49    8.70
   7  -2   2   76.09    4.60
   7  -2   2   78.99    4.70
  -8   2  -2    3.20    1.60
  -8   2  -2   -0.40    5.20
  -8   2  -2   -2.50    4.30
  -8   2  -2   -0.20    1.60
   8  -2   2    3.10    1.80
   8  -2   2   -1.20    1.70
  -9   2  -2  302.97   16.40
  -9   2  -2  299.97   16.70
 -10   2  -2    8.20    5.90
 -10   2  -2   16.40    6.60
 -11   2  -2  136.59   14.00
 -11   2  -2  122.49   13.20
 -12   2  -2    3.80    6.70
 -12   2  -2   21.60    7.90
 -13   2  -2   28.00    9.30
 -13   2  -2   26.70    8.60
 -13  -2   3    4.90    6.70
 -13  -2   3    2.40    5.50
 -12  -2   3  131.79   11.80
 -11  -2   3    8.00    5.00
 -10  -2   3   26.30    5.80
  -9  -2   3   67.79    8.20
  -9  -2   3   62.39    8.80
   8   2  -3  679.83   24.00
  -8  -2   3  643.84   21.70
  -8  -2   3  677.53   23.70
   7   2  -3  100.69    4.80
   7   2  -3   93.49    4.70
   7   2  -3  102.29    8.60
  -7  -2   3  105.89    8.80
  -7  -2   3   89.69    4.20
  -7  -2   3  100.89    7.40
  -7  -2   3  102.99    4.40
   6   2  -3  585.74   16.10
   6   2  -3  582.14   19.40
   6   2  -3  582.14   16.10
  -6  -2   3  593.64   19.40
  -6  -2   3  575.14   17.90
  -6  -2   3  567.94   15.70
  -6  -2   3  581.14   15.80
   5   2  -3  128.49    5.80
   5   2  -3  118.09    7.20
   5   2  -3  106.99    5.20
  -5  -2   3  119.69    7.30
  -5  -2   3  119.09    5.40
  -5  -2   3  132.89    5.60
  -5  -2   3  119.79    6.40
   4   2  -3   15.50    3.00
   4   2  -3   19.50    2.80
   4   2  -3   15.00    2.60
   4   2  -3   14.10    2.30
  -4  -2   3   21.00    3.10
  -4  -2   3   20.10    3.00
  -4  -2   3   16.80    3.00
  -4  -2   3   16.00    2.60
   3   2  -3  240.28    7.90
   3   2  -3  244.08    8.70
   3   2  -3  234.78    8.10
   3   2  -3  240.38    8.70
  -3  -2   3  241.48    6.10
  -3  -2   3  243.88    8.80
  -3  -2   3  239.18    7.90
  -3  -2   3  236.78    8.60
  -3  -2   3  254.07    8.60
  -3  -2   3  246.28    8.20
   2   2  -3 3604.04   83.09
   2   2  -3 3518.25   85.89
   2   2  -3 3773.42   86.09
   2   2  -3 3679.13   85.09
   2   2  -3 3664.93   83.09
  -2  -2   3 3599.04   85.99
  -2  -2   3 3538.05   82.99
  -2  -2   3 3573.24   85.79
  -2  -2   3 3691.43   84.99
  -2  -2   3 3585.54   80.39
   1   2  -3   73.49    4.70
   1   2  -3   68.69    4.90
   1   2  -3   68.59    3.80
   1   2  -3   67.69    5.10
   1   2  -3   66.29    3.90
  -1  -2   3   70.39    4.50
  -1  -2   3   67.69    5.10
  -1  -2   3   65.99    4.10
  -1  -2   3   63.19    5.10
   0   2  -3 1481.55   37.10
   0   2  -3 1503.05   37.20
   0   2  -3 1497.75   36.40
   0   2  -3 1423.16   34.30
   0   2  -3 1442.76   34.60
   0  -2   3 1495.15   34.50
   0  -2   3 1470.55   36.30
   0  -2   3 1413.36   37.00
   0  -2   3 1512.55   37.10
  -1   2  -3   37.40    4.70
  -1   2  -3   31.20    4.50
  -1   2  -3   32.30    3.60
  -1   2  -3   31.50    3.80
  -1   2  -3   31.10    4.40
   1  -2   3   31.30    3.70
   1  -2   3   30.60    4.50
   1  -2   3   34.30    4.10
   1  -2   3   35.80    4.60
  -2   2  -3  156.38    8.00
  -2   2  -3  161.68    7.30
  -2   2  -3  168.08    7.30
  -2   2  -3  155.68    7.30
  -2   2  -3  154.88    6.00
   2  -2   3  170.48    7.90
   2  -2   3  158.48    7.00
   2  -2   3  160.58    7.50
   2  -2   3  149.88    7.00
  -3   2  -3   35.00    5.00
  -3   2  -3   43.00    4.30
  -3   2  -3   38.40    4.30
  -3   2  -3   34.70    4.80
   3  -2   3   40.00    5.40
   3  -2   3   35.30    4.70
   3  -2   3   35.50    4.00
   3  -2   3   30.00    4.00
  -4   2  -3 1333.57   36.70
  -4   2  -3 1322.47   34.40
  -4   2  -3 1346.17   36.60
  -4   2  -3 1341.87   34.40
   4  -2   3 1361.66   34.60
   4  -2   3 1285.77   34.50
   4  -2   3 1349.86   36.80
  -5   2  -3   48.80    6.70
  -5   2  -3   46.40    4.40
  -5   2  -3   52.49    4.40
  -5   2  -3   49.70    6.50
   5  -2   3   44.60    4.60
   5  -2   3   43.60    6.40
   5  -2   3   50.19    4.80
  -6   2  -3  538.35   16.30
  -6   2  -3  537.55   20.10
  -6   2  -3  538.25   20.00
  -6   2  -3  523.75   16.00
   6  -2   3  540.95   16.40
   6  -2   3  488.15   20.00
  -7   2  -3    5.80    5.20
  -7   2  -3    8.70    5.00
  -7   2  -3   10.30    2.80
   7  -2   3    7.00    2.80
   7  -2   3   10.20    5.30
  -8   2  -3    8.10    2.60
  -8   2  -3    0.30    5.50
   8  -2   3    2.70    2.50
   8  -2   3    2.30    2.40
  -9   2  -3   15.70    6.50
   9  -2   3    7.90    2.70
   9  -2   3   13.10    2.70
 -10   2  -3   47.60    8.90
 -10   2  -3   32.00    8.20
  10  -2   3   43.90    3.40
  10  -2   3   36.10    3.30
 -11   2  -3    1.20    6.00
 -11   2  -3   14.10    6.70
 -12   2  -3  115.79   13.90
 -12   2  -3  122.99   14.00
 -13   2  -3   -9.00    6.50
 -13   2  -3   -8.20    6.50
 -13  -2   4  270.37   17.60
 -12  -2   4   10.00    5.60
 -11  -2   4  194.08   12.30
 -10  -2   4   13.80    4.80
  -9  -2   4   26.80    5.80
  -9  -2   4   23.10    5.10
   8   2  -4  187.38    7.20
   8   2  -4  204.98    7.40
  -8  -2   4  191.18    6.70
  -8  -2   4  202.18   10.40
  -8  -2   4  198.08    6.80
  -8  -2   4  202.48   12.00
   7   2  -4  400.36   12.40
   7   2  -4  380.66   12.30
  -7  -2   4  410.66   15.70
  -7  -2   4  378.86   12.00
  -7  -2   4  379.56   12.00
  -7  -2   4  384.76   14.00
   6   2  -4   16.70    2.90
   6   2  -4    7.30    2.20
   6   2  -4    2.20    3.00
  -6  -2   4   13.30    3.10
  -6  -2   4   11.50    3.50
  -6  -2   4   12.70    2.70
  -6  -2   4   13.50    2.70
   5   2  -4   92.69    5.40
   5   2  -4   90.99    6.30
   5   2  -4   88.69    5.60
   5   2  -4   90.79    5.20
  -5  -2   4   88.59    6.00
  -5  -2   4   89.09    5.40
  -5  -2   4   98.99    5.60
  -5  -2   4   97.29    5.50
   4   2  -4    1.60    2.20
   4   2  -4    2.10    1.60
   4   2  -4    1.50    2.00
   4   2  -4    0.60    2.30
  -4  -2   4    4.60    2.00
  -4  -2   4    5.20    2.30
  -4  -2   4   -0.10    2.00
  -4  -2   4    2.70    2.30
  -4  -2   4    2.60    1.10
  -4  -2   4    2.50    2.20
   3   2  -4   49.30    4.70
   3   2  -4   57.79    3.60
   3   2  -4   58.79    4.90
   3   2  -4   52.89    3.50
  -3  -2   4   64.79    3.50
  -3  -2   4   60.49    4.90
  -3  -2   4   57.19    4.60
  -3  -2   4   59.19    3.60
  -3  -2   4   64.69    3.80
  -3  -2   4   55.99    4.80
   2   2  -4   76.39    3.50
   2   2  -4   66.59    5.20
   2   2  -4   78.29    5.00
   2   2  -4   85.49    5.90
   2   2  -4   86.79    4.20
  -2  -2   4   76.79    5.60
  -2  -2   4   78.09    5.50
  -2  -2   4   72.29    4.20
  -2  -2   4   77.69    4.90
   1   2  -4  290.37   11.00
   1   2  -4  323.67   10.50
   1   2  -4  306.07    9.50
   1   2  -4  303.77   11.10
   1   2  -4  303.17    9.40
  -1  -2   4  319.37    9.80
  -1  -2   4  305.57   11.00
  -1  -2   4  314.07   11.30
  -1  -2   4  311.67   10.20
   0   2  -4    8.50    1.80
   0   2  -4   14.70    3.30
   0   2  -4   10.80    2.70
   0   2  -4   13.50    3.40
   0   2  -4    9.80    3.30
   0  -2   4    9.60    3.10
   0  -2   4    8.60    2.60
   0  -2   4    8.10    2.50
   0  -2   4   12.90    3.30
  -1   2  -4   -1.60    2.90
  -1   2  -4   -1.10    2.30
  -1   2  -4   -2.00    2.10
  -1   2  -4   -2.00    2.70
  -1   2  -4    1.40    2.00
   1  -2   4   -0.50    2.60
   1  -2   4   -0.30    0.70
   1  -2   4   -1.80    2.30
   1  -2   4   -0.30    2.50
  -2   2  -4    0.20    2.00
  -2   2  -4    1.60    2.50
  -2   2  -4   -0.20    3.20
  -2   2  -4   -1.20    2.20
  -2   2  -4   -2.40    2.60
   2  -2   4    1.20    2.30
   2  -2   4    5.20    2.50
   2  -2   4    1.90    2.40
   2  -2   4    4.10    2.80
  -3   2  -4  543.45   17.40
  -3   2  -4  521.15   16.70
  -3   2  -4  528.05   16.80
  -3   2  -4  534.25   14.70
  -3   2  -4  514.75   17.70
   3  -2   4  517.95   17.40
   3  -2   4  533.45   17.50
   3  -2   4  538.35   17.00
   3  -2   4  528.15   16.80
  -4   2  -4    2.30    2.70
  -4   2  -4   -1.20    3.20
  -4   2  -4    2.20    2.60
  -4   2  -4    4.90    3.50
   4  -2   4    0.90    3.40
   4  -2   4    5.10    2.80
   4  -2   4    4.10    2.70
  -5   2  -4    1.80    2.60
  -5   2  -4    2.50    3.80
  -5   2  -4    6.40    3.60
   5  -2   4    3.50    3.70
   5  -2   4   -0.90    2.40
   5  -2   4    3.70    2.80
  -6   2  -4   -1.10    4.10
  -6   2  -4    2.70    3.80
  -6   2  -4    5.00    2.90
   6  -2   4   -5.80    3.60
   6  -2   4    6.20    2.90
   6  -2   4    0.30    2.80
  -7   2  -4   61.69    8.50
  -7   2  -4   65.69    6.00
  -7   2  -4   59.19    8.60
   7  -2   4   55.19    5.70
   7  -2   4   60.29    8.60
   7  -2   4   62.39    6.00
  -8   2  -4    5.20    5.80
  -8   2  -4    3.70    2.90
   8  -2   4    2.10    3.10
  -9   2  -4  349.47   18.30
   9  -2   4  347.97   12.80
   9  -2   4  359.96   13.10
 -10   2  -4   25.30    7.60
 -10   2  -4   21.50    7.40
  10  -2   4   16.90    3.40
 -11   2  -4   10.20    7.30
 -11   2  -4    0.00    5.90
  11  -2   4   -1.80    1.80
 -12   2  -4    4.60    6.20
 -12   2  -4   11.70    7.90
 -11  -2   5   -3.60    4.10
 -10  -2   5  241.68   14.70
 -10  -2   5  258.97   12.60
   9   2  -5    4.70    2.10
   9   2  -5    2.70    1.90
  -9  -2   5    2.50    3.40
  -9  -2   5    1.70    4.00
   8   2  -5  123.39    6.50
   8   2  -5  110.69    6.40
  -8  -2   5  118.39    7.90
  -8  -2   5  113.99    6.10
  -8  -2   5  109.39    9.10
   7   2  -5   -1.00    2.40
  -7  -2   5    0.60    3.10
  -7  -2   5    2.00    2.80
  -7  -2   5    4.90    2.50
   6   2  -5   52.69    5.30
   6   2  -5   48.80    5.10
  -6  -2   5   44.20    4.70
  -6  -2   5   48.00    5.60
  -6  -2   5   47.00    4.70
  -6  -2   5   45.00    5.60
   5   2  -5    3.40    2.70
   5   2  -5    0.60    1.80
   5   2  -5   -1.40    2.30
  -5  -2   5    3.80    2.00
  -5  -2   5    5.70    2.60
  -5  -2   5   -1.70    2.00
  -5  -2   5    3.40    2.60
   4   2  -5  298.07    9.30
   4   2  -5  299.87   11.50
   4   2  -5  272.37   11.30
  -4  -2   5  294.77   11.30
  -4  -2   5  289.67   10.70
  -4  -2   5  303.97    9.50
  -4  -2   5  288.87    9.20
  -4  -2   5  287.87   11.00
   3   2  -5   74.19    6.00
   3   2  -5   79.69    6.10
   3   2  -5   80.59    4.20
  -3  -2   5   71.39    5.10
  -3  -2   5   82.19    5.80
  -3  -2   5   79.49    6.00
  -3  -2   5   78.29    4.60
   2   2  -5  599.34   16.10
   2   2  -5  584.24   18.70
   2   2  -5  600.94   17.40
   2   2  -5  571.54   18.60
   2   2  -5  598.44   15.50
  -2  -2   5  625.34   18.70
  -2  -2   5  609.34   18.90
  -2  -2   5  588.24   16.30
  -2  -2   5  598.84   17.20
   1   2  -5  547.25   16.20
   1   2  -5  539.75   15.10
   1   2  -5  534.85   17.60
   1   2  -5  547.95   17.60
  -1  -2   5  539.55   15.30
  -1  -2   5  526.45   16.00
  -1  -2   5  543.65   17.70
  -1  -2   5  517.95   17.10
   0   2  -5  204.68    9.00
   0   2  -5  212.58   10.10
   0   2  -5  208.18    8.30
   0   2  -5  212.08    7.00
   0   2  -5  228.28   10.10
   0  -2   5  207.68    8.80
   0  -2   5  227.88    9.90
   0  -2   5  209.18    8.20
   0  -2   5  210.48   10.10
  -1   2  -5   97.19    7.20
  -1   2  -5   98.59    6.00
  -1   2  -5  107.79    6.90
  -1   2  -5  109.99    5.70
   1  -2   5  105.59    7.20
   1  -2   5  101.39    7.30
   1  -2   5  104.69    6.70
  -2   2  -5 1124.09   31.90
  -2   2  -5 1150.98   32.00
  -2   2  -5 1145.39   30.60
  -2   2  -5 1189.38   29.30
  -2   2  -5 1192.18   32.20
   2  -2   5 1177.78   31.80
   2  -2   5 1106.99   32.10
   2  -2   5 1123.49   30.70
   2  -2   5 1129.99   31.90
  -3   2  -5    0.70    2.80
  -3   2  -5    1.70    2.70
  -3   2  -5    5.50    3.30
  -3   2  -5    0.40    2.40
  -3   2  -5    0.50    3.30
   3  -2   5   -0.90    3.00
   3  -2   5    6.30    3.30
   3  -2   5    2.00    3.30
   3  -2   5   -1.40    2.60
  -4   2  -5  407.96   12.80
  -4   2  -5  419.56   15.80
  -4   2  -5  412.46   16.30
  -4   2  -5  388.46   14.70
   4  -2   5  392.06   15.00
   4  -2   5  423.96   15.20
   4  -2   5  396.46   15.90
  -5   2  -5   22.40    6.00
  -5   2  -5   16.00    4.00
  -5   2  -5   25.70    5.40
   5  -2   5   19.10    4.80
   5  -2   5   33.60    5.00
   5  -2   5   25.60    4.70
  -6   2  -5  103.29   10.00
  -6   2  -5  107.29   10.10
  -6   2  -5  112.99    8.00
   6  -2   5  121.09   10.40
   6  -2   5  123.69    8.20
   6  -2   5  142.29    8.40
  -7   2  -5   -0.80    4.70
  -7   2  -5    2.80    5.40
  -7   2  -5   -1.10    2.80
   7  -2   5   -2.20    3.10
   7  -2   5   -3.20    4.10
   7  -2   5   -0.70    2.90
  -8   2  -5  147.99   12.60
  -8   2  -5  148.79    9.00
   8  -2   5  162.08    9.30
   8  -2   5  172.18    9.80
  -9   2  -5   20.50    7.30
   9  -2   5   15.10    4.10
 -10   2  -5  152.68   14.40
 -10   2  -5  144.59   14.00
  10  -2   5  144.69    8.70
 -11   2  -5    7.10    6.70
 -11   2  -5   15.20    8.00
  11  -2   5    0.60    3.00
 -12   2  -5    6.90    8.00
 -12   2  -5   -7.50    6.20
  10   2  -6    2.30    1.90
 -10  -2   6    5.60    3.70
 -10  -2   6   -9.50    3.40
   9   2  -6  682.73   20.10
   9   2  -6  679.33   20.20
  -9  -2   6  702.23   24.20
  -9  -2   6  717.33   21.50
   8   2  -6    6.90    3.20
  -8  -2   6    3.20    3.80
  -8  -2   6    8.30    3.10
  -8  -2   6    9.70    3.30
   7   2  -6  273.07   11.50
  -7  -2   6  268.37   12.10
  -7  -2   6  265.87   10.00
  -7  -2   6  250.87   10.80
  -7  -2   6  269.87   11.80
   6   2  -6   56.89    5.70
   6   2  -6   51.99    6.00
  -6  -2   6   44.00    4.40
  -6  -2   6   42.40    5.60
  -6  -2   6   58.39    6.10
  -6  -2   6   49.50    5.40
   5   2  -6  251.07    8.60
   5   2  -6  239.58   11.20
   5   2  -6  255.87   11.20
  -5  -2   6  250.97    9.10
  -5  -2   6  252.37    8.50
  -5  -2   6  244.48   10.90
  -5  -2   6  262.47   10.60
   4   2  -6   -1.60    2.60
   4   2  -6    2.80    1.60
   4   2  -6    2.80    3.30
  -4  -2   6    2.60    2.40
  -4  -2   6    0.90    2.80
   3   2  -6  975.90   26.80
   3   2  -6 1027.50   28.90
   3   2  -6  981.10   28.80
   3   2  -6  979.80   22.50
   3   2  -6 1001.70   25.10
  -3  -2   6  973.50   25.50
  -3  -2   6 1016.60   28.90
  -3  -2   6  971.60   26.60
   2   2  -6   15.50    4.00
   2   2  -6   16.80    2.60
   2   2  -6   10.70    3.10
   2   2  -6   14.20    4.10
   2   2  -6   14.60    2.70
  -2  -2   6   24.70    3.70
  -2  -2   6   19.30    4.00
  -2  -2   6   14.60    3.60
  -2  -2   6   22.10    3.70
   1   2  -6  156.68    7.40
   1   2  -6  187.58    9.90
   1   2  -6  166.08    8.20
   1   2  -6  180.58    9.60
  -1  -2   6  170.18    7.90
  -1  -2   6  176.38    9.60
  -1  -2   6  168.08    9.20
  -1  -2   6  175.08    7.90
   0   2  -6   22.70    4.90
   0   2  -6   16.70    3.70
   0   2  -6   20.70    2.90
   0   2  -6   16.40    4.00
   0   2  -6   20.60    3.60
   0  -2   6   31.60    4.60
   0  -2   6   17.40    4.00
   0  -2   6   22.60    4.70
   0  -2   6   17.10    3.10
  -1   2  -6   14.20    3.80
  -1   2  -6   14.00    2.70
  -1   2  -6   15.90    3.40
  -1   2  -6   23.50    4.50
  -1   2  -6   19.70    4.40
   1  -2   6   11.90    3.90
   1  -2   6   11.50    3.00
   1  -2   6   20.30    3.70
   1  -2   6   16.90    4.00
  -2   2  -6    6.80    3.00
  -2   2  -6    6.80    2.90
  -2   2  -6    8.80    3.60
  -2   2  -6    6.50    3.70
   2  -2   6   10.20    4.00
   2  -2   6    8.60    2.90
   2  -2   6    6.20    3.50
   2  -2   6    4.90    3.60
  -3   2  -6  867.41   24.00
  -3   2  -6  887.01   27.50
  -3   2  -6  841.82   26.70
  -3   2  -6  874.11   25.90
   3  -2   6  860.61   27.00
   3  -2   6  845.12   26.00
   3  -2   6  914.11   27.10
   3  -2   6  896.61   27.00
  -4   2  -6   14.20    4.40
  -4   2  -6   10.20    3.90
  -4   2  -6    8.20    3.20
  -4   2  -6   18.40    5.70
   4  -2   6    8.80    4.00
   4  -2   6    9.50    3.90
   4  -2   6    8.20    3.80
  -5   2  -6  296.47   14.30
  -5   2  -6  296.37   11.30
  -5   2  -6  270.47   13.00
  -5   2  -6  276.57   14.90
   5  -2   6  290.77   14.50
   5  -2   6  269.67   13.20
   5  -2   6  291.97   13.40
  -6   2  -6   21.20    4.90
  -6   2  -6    5.80    5.00
  -6   2  -6   22.30    5.80
   6  -2   6   22.20    5.10
   6  -2   6   15.50    4.60
   6  -2   6   24.00    6.10
  -7   2  -6   42.00    6.10
  -7   2  -6   36.00    8.10
   7  -2   6   45.50    6.70
   7  -2   6   35.00    6.00
  -8   2  -6    7.10    5.80
  -8   2  -6    7.70    3.90
   8  -2   6    3.10    3.30
   8  -2   6    4.10    4.00
  -9   2  -6   84.59   11.90
   9  -2   6   79.19    8.00
 -10   2  -6   54.79   10.50
 -10   2  -6   55.59   10.00
  10  -2   6   58.89    7.30
 -11   2  -6   44.10   10.10
 -11   2  -6   40.30   10.20
  11  -2   6   35.60    5.70
 -12   2  -6   -6.10    7.00
 -12   2  -6   -3.30    7.50
  12  -2   6   -0.20    3.00
  10   2  -7   35.60    4.80
   9   2  -7   13.60    3.70
  -9  -2   7   11.60    4.40
  -9  -2   7    8.20    3.30
   8   2  -7  225.88   10.90
  -8  -2   7  236.58   11.60
  -8  -2   7  238.18    9.20
  -8  -2   7  236.68   10.70
   7   2  -7   -4.10    2.90
   7   2  -7    4.90    3.70
  -7  -2   7    7.20    3.90
  -7  -2   7    2.20    3.10
  -7  -2   7   -1.30    2.90
  -7  -2   7   -1.80    2.20
   6   2  -7   64.49    6.80
   6   2  -7   64.89    7.00
  -6  -2   7   53.59    5.10
  -6  -2   7   65.19    6.40
  -6  -2   7   58.09    6.40
  -6  -2   7   58.69    4.40
   5   2  -7    1.10    1.90
   5   2  -7    4.50    3.60
   5   2  -7   -0.70    3.30
  -5  -2   7   -2.90    2.90
  -5  -2   7   -3.70    2.60
   4   2  -7  182.88   10.40
   4   2  -7  186.88   10.40
   4   2  -7  180.18    6.90
  -4  -2   7  180.28   10.10
  -4  -2   7  185.58    8.70
   3   2  -7    0.20    1.70
   3   2  -7    7.10    3.90
   3   2  -7   -1.80    2.50
   3   2  -7   -3.60    3.00
   3   2  -7   -0.80    1.50
  -3  -2   7   -3.90    2.40
  -3  -2   7   -0.10    3.20
   2   2  -7  232.58   11.30
   2   2  -7  219.38    8.50
   2   2  -7  231.38    9.80
   2   2  -7  222.58   11.30
   2   2  -7  232.88    8.70
  -2  -2   7  201.68   10.90
  -2  -2   7  219.98    9.40
  -2  -2   7  214.18    9.40
   1   2  -7   26.50    4.40
   1   2  -7   33.60    4.30
   1   2  -7   36.30    5.80
   1   2  -7   15.10    4.40
  -1  -2   7   22.80    5.00
  -1  -2   7   32.60    4.60
  -1  -2   7   35.10    4.60
   0   2  -7  104.29    8.20
   0   2  -7  110.59    5.10
   0   2  -7  106.19    8.30
   0   2  -7  117.49    7.80
   0   2  -7  103.09    7.00
   0  -2   7  101.49    7.00
   0  -2   7   99.09    8.10
   0  -2   7   99.19    6.80
  -1   2  -7   -2.90    1.90
  -1   2  -7    0.70    2.70
  -1   2  -7    2.20    3.40
  -1   2  -7   -3.40    3.10
   1  -2   7   -6.70    2.30
   1  -2   7    1.90    3.00
   1  -2   7    0.90    3.50
   1  -2   7    1.50    3.10
  -2   2  -7  243.78   10.40
  -2   2  -7  231.98   10.50
  -2   2  -7  231.88   12.10
  -2   2  -7  259.77   12.80
   2  -2   7  245.88   12.10
   2  -2   7  252.37   11.90
  -3   2  -7   66.89    8.40
  -3   2  -7   76.79    8.00
  -3   2  -7   66.19    6.60
  -3   2  -7   59.19    6.30
   3  -2   7   72.29    7.70
   3  -2   7   70.19    7.80
   3  -2   7   61.19    7.00
  -4   2  -7    3.00    4.20
  -4   2  -7    1.50    3.60
  -4   2  -7    2.10    4.80
  -4   2  -7   -0.20    3.00
   4  -2   7    5.80    4.30
   4  -2   7    0.40    3.70
   4  -2   7    5.70    3.90
  -5   2  -7   73.49    7.00
  -5   2  -7   67.49    8.60
  -5   2  -7   71.79    9.80
  -5   2  -7   74.19    8.10
   5  -2   7   78.99    8.90
   5  -2   7   75.59    8.30
   5  -2   7   66.19    7.90
  -6   2  -7  323.47   13.10
  -6   2  -7  313.17   17.40
  -6   2  -7  311.97   15.00
  -6   2  -7  324.57   16.50
   6  -2   7  339.47   15.20
   6  -2   7  302.17   15.10
  -7   2  -7    5.40    5.70
  -7   2  -7   -1.50    3.30
  -7   2  -7   -1.80    3.70
   7  -2   7   -1.40    3.70
   7  -2   7    8.50    4.50
  -8   2  -7  404.16   20.60
  -8   2  -7  362.16   16.10
   8  -2   7  342.37   16.20
  -9   2  -7    8.20    6.60
   9  -2   7   -7.50    3.20
 -10   2  -7   15.10    7.90
  10  -2   7    7.30    4.50
 -11   2  -7   23.10    8.90
 -11   2  -7   26.10    9.40
  11  -2   7    8.10    4.40
  11   2  -8  215.68    9.00
  10   2  -8   -5.70    2.90
   9   2  -8   74.69    7.20
   8   2  -8    6.00    4.00
  -8  -2   8    3.90    2.20
   7   2  -8   63.89    7.10
   7   2  -8   61.29    7.50
  -7  -2   8   64.19    7.00
  -7  -2   8   63.29    7.30
   6   2  -8   38.70    6.00
   6   2  -8   32.60    5.80
  -6  -2   8   35.70    5.30
  -6  -2   8   25.00    5.20
   5   2  -8  367.36   15.90
   5   2  -8  374.46   11.10
   5   2  -8  390.56   16.00
  -5  -2   8  359.46   13.70
  -5  -2   8  371.96   15.80
   4   2  -8   21.90    2.90
   4   2  -8   31.40    5.80
   4   2  -8   26.10    5.80
  -4  -2   8   23.00    5.30
  -4  -2   8   19.10    4.10
   3   2  -8  137.99    6.50
   3   2  -8  128.89   10.40
   3   2  -8  136.59    9.80
   3   2  -8  132.99    7.90
   3   2  -8  137.39    6.00
  -3  -2   8  119.59    9.50
  -3  -2   8  135.29    8.00
   2   2  -8   62.99    6.30
   2   2  -8   58.89    4.90
   2   2  -8   49.60    7.10
   2   2  -8   55.09    7.60
   2   2  -8   59.29    5.40
  -2  -2   8   46.70    6.80
  -2  -2   8   54.89    6.20
  -2  -2   8   61.69    6.00
   1   2  -8  436.76   15.90
   1   2  -8  445.56   14.80
   1   2  -8  443.46   17.90
  -1  -2   8  438.96   15.60
  -1  -2   8  435.76   15.10
  -1  -2   8  403.96   17.40
   0   2  -8  260.57   11.10
   0   2  -8  242.18   11.60
   0   2  -8  262.87   13.70
   0  -2   8  234.88   11.10
   0  -2   8  244.38   10.90
   0  -2   8  241.98   13.30
  -1   2  -8  595.24   22.70
  -1   2  -8  655.73   21.80
  -1   2  -8  664.33   20.40
  -1   2  -8  676.83   19.10
   1  -2   8  651.83   21.50
   1  -2   8  578.64   22.60
   1  -2   8  643.64   19.90
  -2   2  -8   32.30    5.90
  -2   2  -8   21.60    4.10
  -2   2  -8   25.00    4.90
  -2   2  -8   26.20    5.70
   2  -2   8   28.70    5.90
  -3   2  -8    4.70    3.60
  -3   2  -8    6.50    4.80
  -3   2  -8    3.70    5.20
  -3   2  -8    1.40    3.40
   3  -2   8    1.10    4.00
  -4   2  -8  234.28   14.10
  -4   2  -8  195.68   10.70
  -4   2  -8  208.38   11.80
  -4   2  -8  211.88   12.80
   4  -2   8  207.38   12.90
   4  -2   8  191.18   12.40
  -5   2  -8  152.38    9.80
  -5   2  -8  173.48   13.40
  -5   2  -8  178.88   12.00
  -5   2  -8  159.48   11.50
   5  -2   8  140.79   11.30
   5  -2   8  175.48   11.80
  -6   2  -8    7.90    4.80
  -6   2  -8    5.40    6.30
  -6   2  -8    6.30    5.30
  -6   2  -8    5.90    3.80
   6  -2   8    4.40    4.50
   6  -2   8    1.50    4.00
  -7   2  -8   59.59    9.80
  -7   2  -8   56.09    8.30
   7  -2   8   47.50    7.70
  -8   2  -8   74.09   11.10
   8  -2   8   83.49    9.40
  -9   2  -8  146.99   15.10
   9  -2   8  172.08   12.10
 -10   2  -8   57.09   10.90
  10  -2   8   30.80    6.70
 -11   2  -8    9.00    7.90
 -11   2  -8    5.20    7.40
  11  -2   8    1.40    4.50
  11   2  -9    1.30    3.30
  10   2  -9  419.06   16.50
   9   2  -9    6.80    4.20
   8   2  -9  118.09    9.40
   7   2  -9   13.10    4.80
  -7  -2   9   10.20    4.70
   6   2  -9   30.30    5.90
   6   2  -9   29.10    6.30
  -6  -2   9   27.00    4.80
  -6  -2   9   25.90    5.50
   5   2  -9   -1.40    3.90
   5   2  -9    0.50    1.70
   5   2  -9    2.20    4.60
  -5  -2   9    1.60    4.20
  -5  -2   9   -0.40    3.40
   4   2  -9  160.78   11.10
   4   2  -9  160.28    9.20
   4   2  -9  169.58    7.10
   4   2  -9  182.48   11.70
  -4  -2   9  186.68    9.40
  -4  -2   9  182.78   11.70
   3   2  -9  141.29    7.00
   3   2  -9  131.29    6.50
   3   2  -9  127.19    8.20
   3   2  -9  135.09   10.80
  -3  -2   9  147.59    8.50
  -3  -2   9  134.69   10.70
   2   2  -9   84.99    6.10
   2   2  -9   76.39    6.50
   2   2  -9   74.09    7.20
   2   2  -9   78.19    8.60
  -2  -2   9   84.49    7.20
  -2  -2   9   77.69    8.50
  -2  -2   9   94.49    7.70
   1   2  -9    6.50    3.60
   1   2  -9    1.20    4.20
   1   2  -9    0.90    3.80
  -1  -2   9   -3.20    3.20
  -1  -2   9    9.50    3.70
  -1  -2   9    0.50    4.50
   0   2  -9   93.69    7.80
   0   2  -9   91.09    8.30
   0   2  -9   98.39   10.20
   0  -2   9   97.69    8.00
   0  -2   9  104.59    8.10
   0  -2   9  103.29   10.10
  -1   2  -9   -0.90    4.20
  -1   2  -9    0.90    2.60
  -1   2  -9   -0.10    3.60
  -1   2  -9    1.90    4.30
   1  -2   9    3.90    3.80
   1  -2   9    3.00    4.60
  -2   2  -9  570.34   21.40
  -2   2  -9  536.75   18.50
  -2   2  -9  549.45   19.40
  -2   2  -9  598.54   22.90
   2  -2   9  592.74   23.20
  -3   2  -9   21.30    4.90
  -3   2  -9   23.20    6.50
  -3   2  -9   41.90    6.40
  -3   2  -9   25.50    6.60
   3  -2   9   31.20    7.10
  -4   2  -9   47.50    6.90
  -4   2  -9   58.79    9.00
  -4   2  -9   46.70    6.50
  -4   2  -9   52.59    8.20
   4  -2   9   60.99    8.70
  -5   2  -9   90.69    9.90
  -5   2  -9   83.39    9.80
  -5   2  -9   88.09    8.70
  -5   2  -9   85.59   11.40
   5  -2   9  102.49   10.50
  -6   2  -9  169.28   13.60
  -6   2  -9  167.28   12.30
   6  -2   9  168.68   12.50
  -7   2  -9   -2.10    4.30
  -7   2  -9   -3.70    5.70
   7  -2   9    1.50    4.90
  -8   2  -9   41.40   10.30
   8  -2   9   32.10    7.20
  -9   2  -9   14.90    7.80
   9  -2   9   23.10    6.30
 -10   2  -9  191.68   18.00
 -10   2  -9  225.28   18.40
  10  -2   9  188.28   13.70
  11   2 -10    7.30    4.30
  10   2 -10    6.10    4.40
   9   2 -10  237.88   13.40
   8   2 -10    5.10    4.80
   7   2 -10  239.78   14.00
  -7  -2  10  234.88   13.50
   6   2 -10   29.10    6.60
  -6  -2  10   41.30    7.00
   5   2 -10  202.58    7.40
   5   2 -10  215.78   13.60
   5   2 -10  216.28   13.40
  -5  -2  10  211.48   10.60
  -5  -2  10  223.58   13.50
   4   2 -10   66.69    9.30
   4   2 -10   53.09    4.60
   4   2 -10   54.29    6.50
  -4  -2  10   57.89    6.80
  -4  -2  10   46.80    7.40
   3   2 -10  112.69    6.60
   3   2 -10  120.89    8.50
   3   2 -10  109.29    6.60
   3   2 -10  111.19   10.90
  -3  -2  10   90.69    7.90
  -3  -2  10  120.99   10.80
   2   2 -10   -1.40    4.90
   2   2 -10   -0.40    2.50
   2   2 -10    0.00    3.70
   2   2 -10   -1.00    3.30
  -2  -2  10   -0.30    4.00
  -2  -2  10    0.70    3.50
  -2  -2  10   -4.00    4.60
   1   2 -10  206.48   10.70
   1   2 -10  195.38   13.10
   1   2 -10  201.48   11.50
  -1  -2  10  212.18   13.80
  -1  -2  10  188.28   11.10
   0   2 -10   11.60    6.10
   0   2 -10    9.80    4.40
   0   2 -10   -0.50    4.00
   0  -2  10    1.20    4.20
   0  -2  10    3.90    5.20
  -1   2 -10  436.36   16.80
  -1   2 -10  391.96   17.80
  -1   2 -10  404.46   19.40
   1  -2  10  439.36   20.10
   1  -2  10  416.66   16.20
  -2   2 -10   11.00    5.50
  -2   2 -10    7.70    5.80
  -2   2 -10    4.00    3.40
  -2   2 -10    1.30    4.30
   2  -2  10   11.20    5.50
  -3   2 -10  105.29   10.80
  -3   2 -10  111.29    9.00
  -3   2 -10  105.29   11.20
  -3   2 -10  110.09    9.90
   3  -2  10  115.39   10.90
  -4   2 -10    3.90    4.50
  -4   2 -10    5.50    5.40
  -4   2 -10    4.20    4.20
  -4   2 -10    0.40    5.00
   4  -2  10    0.30    4.20
  -5   2 -10  290.27   14.30
  -5   2 -10  285.07   15.20
  -5   2 -10  322.07   17.60
  -5   2 -10  272.27   16.20
   5  -2  10  289.97   16.40
  -6   2 -10    3.30    6.50
  -6   2 -10    0.70    4.90
   6  -2  10    5.20    5.30
  -7   2 -10   82.69   10.20
  -7   2 -10   88.49   12.00
   7  -2  10   89.29   10.80
  -8   2 -10   28.60    9.40
   8  -2  10   25.20    7.30
  -9   2 -10    5.50    7.30
   9  -2  10    5.30    5.40
 -10   2 -10   25.00    9.60
 -10   2 -10   30.60    9.40
  10  -2  10   13.70    6.40
  10   2 -11   14.30    5.40
   9   2 -11    6.80    4.80
   8   2 -11   95.59   10.30
   7   2 -11   15.70    6.10
   6   2 -11  536.65   22.40
  -6  -2  11  494.65   21.50
   5   2 -11    6.20    5.50
  -5  -2  11   14.50    5.90
   4   2 -11   47.80    7.80
   4   2 -11   47.80    6.40
   4   2 -11   47.60    5.10
  -4  -2  11   52.99    6.70
  -4  -2  11   44.80    8.20
   3   2 -11   25.20    6.80
   3   2 -11   31.20    4.30
   3   2 -11   26.20    5.20
   3   2 -11   22.40    3.90
  -3  -2  11   21.10    4.80
  -3  -2  11   23.40    6.60
   2   2 -11  285.47   13.70
   2   2 -11  279.17   12.00
   2   2 -11  283.47   12.20
   2   2 -11  284.07   16.80
  -2  -2  11  304.07   16.50
   1   2 -11   49.10    7.00
   1   2 -11   40.60    7.70
   1   2 -11   61.19    7.50
  -1  -2  11   59.79    8.00
  -1  -2  11   53.29    9.10
   0   2 -11  195.08   12.30
   0   2 -11  173.18   11.10
   0   2 -11  164.58   13.10
   0  -2  11  191.48   11.60
   0  -2  11  152.98   12.70
  -1   2 -11   19.00    5.30
  -1   2 -11   15.80    5.70
  -1   2 -11   18.30    6.70
   1  -2  11    9.60    5.80
   1  -2  11   17.00    5.00
  -2   2 -11   44.50    7.80
  -2   2 -11   45.20    8.30
  -2   2 -11   43.90    6.70
  -2   2 -11   51.99    6.50
   2  -2  11   62.29    9.70
  -3   2 -11   16.60    6.20
  -3   2 -11   21.60    5.70
  -3   2 -11   13.60    4.60
  -3   2 -11   23.20    7.00
   3  -2  11   17.90    7.10
  -4   2 -11   20.90    5.80
  -4   2 -11   20.90    5.60
  -4   2 -11   14.10    6.20
  -4   2 -11   20.00    7.30
   4  -2  11    8.60    6.20
  -5   2 -11    6.60    5.80
  -5   2 -11   10.50    6.80
   5  -2  11    3.00    5.40
  -6   2 -11   48.10    9.00
  -6   2 -11   57.59    9.80
   6  -2  11   44.90    8.80
  -7   2 -11    2.60    5.20
  -7   2 -11    8.00    7.30
   7  -2  11    3.30    5.70
  -8   2 -11    8.40    7.70
   8  -2  11    3.50    6.00
  -9   2 -11   57.49   11.20
   9  -2  11   60.69   10.00
   9   2 -12   -0.50    4.60
   8   2 -12    6.90    5.60
   7   2 -12   14.00    6.10
   6   2 -12    8.90    5.80
  -6  -2  12   11.50    5.90
   5   2 -12  221.48   15.30
  -5  -2  12  216.18   14.90
   4   2 -12  127.19    9.00
   4   2 -12  117.79   12.30
  -4  -2  12  135.69   12.50
   3   2 -12  171.88   13.90
   3   2 -12  161.88    8.30
   3   2 -12  149.99   10.10
  -3  -2  12  153.58   13.20
   2   2 -12   51.89    6.70
   2   2 -12   65.49   10.20
   2   2 -12   46.20    6.80
  -2  -2  12   53.39    8.80
   1   2 -12    0.80    3.90
   1   2 -12    4.60    5.90
   1   2 -12   -2.20    3.40
  -1  -2  12   -0.70    4.50
   0   2 -12   54.49    9.60
   0   2 -12   47.00    7.40
   0   2 -12   53.89    7.10
   0  -2  12   74.19   10.70
  -1   2 -12  324.77   15.50
  -1   2 -12  311.37   16.10
  -1   2 -12  334.07   19.20
   1  -2  12  336.27   18.70
  -2   2 -12   34.20    8.10
  -2   2 -12   50.09    8.20
  -2   2 -12   48.90    7.30
   2  -2  12   48.80    9.10
  -3   2 -12  178.18   14.90
  -3   2 -12  188.78   14.00
  -3   2 -12  185.38   11.20
  -3   2 -12  191.98   12.80
   3  -2  12  195.98   15.50
  -4   2 -12    2.80    6.10
  -4   2 -12   -5.10    3.90
  -4   2 -12   -3.10    4.70
  -4   2 -12   -5.70    4.70
   4  -2  12   12.80    6.40
  -5   2 -12  206.08   15.90
  -5   2 -12  170.18   15.00
   5  -2  12  192.88   14.90
  -6   2 -12    5.30    7.20
  -6   2 -12    3.10    6.10
   6  -2  12   -1.70    5.30
  -7   2 -12  148.39   15.70
   7  -2  12  106.09   13.40
  -8   2 -12  -10.30    6.10
   8  -2  12   -5.60    5.00
   9   2 -13   10.00    6.00
   8   2 -13  127.19   13.00
   7   2 -13   28.40    7.70
   6   2 -13   85.59   12.10
   5   2 -13    5.50    5.90
  -5  -2  13    1.60    5.50
   4   2 -13  171.48   10.60
   4   2 -13  192.58   14.70
  -4  -2  13  158.78   14.10
   3   2 -13   12.40    3.70
   3   2 -13   18.10    5.30
   3   2 -13   18.40    7.60
  -3  -2  13   18.90    7.10
   2   2 -13  361.56   20.00
   2   2 -13  351.76   16.40
   2   2 -13  328.97   14.20
  -2  -2  13  389.46   21.00
   1   2 -13    7.90    6.00
   1   2 -13   -0.30    4.00
   1   2 -13    1.90    4.50
  -1  -2  13   -4.60    5.20
   0   2 -13   35.10    6.40
   0   2 -13   23.00    7.50
   0   2 -13   30.90    6.80
   0  -2  13   28.20    7.90
  -1   2 -13   66.09   10.60
  -1   2 -13   81.99   10.10
  -1   2 -13   66.59    9.00
   1  -2  13   78.29   11.20
  -2   2 -13  107.39   10.60
  -2   2 -13  142.49   14.40
  -2   2 -13  122.29   11.90
   2  -2  13   97.69   12.10
  -3   2 -13    6.50    6.70
  -3   2 -13    8.10    6.00
  -3   2 -13   20.00    5.90
   3  -2  13   18.60    7.30
  -4   2 -13  210.78   16.80
  -4   2 -13  187.88   15.10
   4  -2  13  202.18   16.80
  -5   2 -13    4.40    6.30
  -5   2 -13   13.30    7.50
   5  -2  13    2.80    6.30
  -6   2 -13   98.59   13.60
  -6   2 -13  100.59   13.10
   6  -2  13  112.09   13.60
  -7   2 -13    3.00    7.30
   7  -2  13    8.50    7.00
   7   2 -14   63.19   10.60
   6   2 -14   23.20    8.30
   5   2 -14    1.70    5.10
  -5  -2  14    1.00    6.30
   4   2 -14    8.30    6.40
   4   2 -14    1.80    3.70
  -4  -2  14   -3.60    5.70
   3   2 -14   83.09    6.70
   3   2 -14   64.89    8.20
   3   2 -14   54.19   10.80
  -3  -2  14   82.29   12.10
   2   2 -14    7.50    7.00
   2   2 -14    4.20    3.80
   2   2 -14    4.80    4.80
  -2  -2  14    7.50    6.20
   1   2 -14  171.38   12.60
   1   2 -14  182.48   11.70
   1   2 -14  175.98   15.30
  -1  -2  14  169.28   15.10
   0   2 -14  107.09   13.00
   0   2 -14   86.79    9.90
   0   2 -14  104.09   11.00
   0  -2  14   79.89   12.00
  -1   2 -14   -1.10    4.50
  -1   2 -14    2.90    5.80
  -1   2 -14    3.20    5.20
   1  -2  14    3.90    6.80
  -2   2 -14   11.10    7.40
  -2   2 -14    5.90    5.20
  -2   2 -14    0.40    5.60
   2  -2  14    8.00    6.20
  -3   2 -14    9.50    6.70
  -3   2 -14    0.60    4.90
  -3   2 -14    1.00    5.80
   3  -2  14    3.30    7.30
  -4   2 -14   -4.90    5.70
  -4   2 -14   -3.90    6.10
   4  -2  14   -3.30    6.10
  -5   2 -14   32.40    8.80
  -5   2 -14   37.10    9.70
   5  -2  14   54.69   10.70
  -6   2 -14    1.90    7.10
  -6   2 -14    2.90    7.00
   6  -2  14   -0.90    5.70
   6   2 -15  158.68   15.90
   5   2 -15    5.70    6.90
   4   2 -15   54.29   10.70
  -4  -2  15   74.09   12.20
   3   2 -15    3.40    3.10
   3   2 -15    0.10    5.00
   3   2 -15   12.20    7.40
  -3  -2  15    0.50    5.50
   2   2 -15    8.00    6.80
   2   2 -15    7.00    4.10
   2   2 -15   10.40    5.70
  -2  -2  15   11.20    7.40
   1   2 -15    0.20    5.20
   1   2 -15    5.60    7.20
   1   2 -15    6.30    4.60
  -1  -2  15    5.60    6.50
   0   2 -15  220.78   17.80
   0   2 -15  206.58   13.60
   0   2 -15  229.88   15.20
   0  -2  15  217.98   17.60
  -1   2 -15   12.70    7.70
  -1   2 -15   12.70    6.30
  -1   2 -15   19.30    6.40
   1  -2  15   18.80    8.40
  -2   2 -15  181.28   15.00
  -2   2 -15  220.98   14.70
  -2   2 -15  188.18   17.90
   2  -2  15  240.98   19.20
  -3   2 -15   11.30    7.40
  -3   2 -15    0.70    5.80
  -3   2 -15   -2.40    5.30
   3  -2  15    3.40    7.50
  -4   2 -15  101.79   13.50
  -4   2 -15  110.99   15.20
   4  -2  15  103.29   14.90
  -5   2 -15    3.10    7.30
  -5   2 -15   -7.60    6.20
   5  -2  15   13.80    7.50
   4   2 -16   -0.60    6.60
  -4  -2  16   -4.90    7.00
   3   2 -16  214.38   10.10
   3   2 -16  243.98   19.80
  -3  -2  16  195.08   18.40
   2   2 -16   -6.40    6.70
   2   2 -16    6.50    4.10
  -2  -2  16   -0.40    7.30
   1   2 -16   19.40    5.90
   1   2 -16   18.90    6.50
   1   2 -16   14.90    9.00
  -1  -2  16   30.40    9.00
   0   2 -16   13.20    5.80
   0   2 -16   -4.40    5.30
   0   2 -16    8.30    8.00
   0  -2  16    5.60    7.00
  -1   2 -16  199.38   15.60
  -1   2 -16  185.78   17.50
  -1   2 -16  210.38   14.60
   1  -2  16  182.88   17.30
  -2   2 -16   11.60    7.00
  -2   2 -16   14.50    6.70
  -2   2 -16   14.00    8.30
   2  -2  16   15.10    8.70
   2   3  16   71.29   12.70
  -2  -3 -16   56.89    9.90
  -2  -3 -16   53.89    9.10
  -2  -3 -16   55.59    9.60
  -2  -3 -16   71.39   13.50
   1   3  16    3.10    7.50
  -1  -3 -16   -7.90    7.00
  -1  -3 -16   14.00    6.10
  -1  -3 -16    7.10    5.80
  -1  -3 -16   -0.40    5.40
   0   3  16  141.79   16.50
   0  -3 -16  143.69   16.90
   0  -3 -16  116.69   11.30
  -1   3  16   96.29   13.80
   1  -3 -16   66.59    9.00
   1  -3 -16   73.69   12.70
  -2   3  16    4.80    7.50
   2  -3 -16   -2.10    6.50
   2  -3 -16    4.90    4.00
  -3   3  16   -1.30    6.80
   3  -3 -16    7.70    7.30
   3  -3 -16    3.60    2.80
  -4   3  16   10.00    8.10
   4  -3 -16   -0.40    6.90
  -5  -3 -15   19.50    7.90
  -5  -3 -15    2.90    6.90
   4   3  15    8.40    7.30
  -4  -3 -15    2.20    5.90
  -4  -3 -15   11.00    7.70
  -4  -3 -15   -2.80    6.10
   3   3  15  101.39   13.60
  -3  -3 -15   77.79   11.00
  -3  -3 -15   60.89   10.10
  -3  -3 -15   81.79   11.10
  -3  -3 -15   77.29   12.80
   2   3  15   17.20    8.40
  -2  -3 -15    5.10    7.50
  -2  -3 -15    3.00    5.50
  -2  -3 -15    3.50    5.00
  -2  -3 -15    9.50    6.60
   1   3  15   17.40    7.60
  -1  -3 -15   19.00    6.40
  -1  -3 -15   19.80    6.30
  -1  -3 -15   21.70    8.70
  -1  -3 -15    9.60    5.80
   0   3  15   32.90    9.80
   0  -3 -15   32.20    6.80
   0  -3 -15   31.20    6.50
   0  -3 -15   23.50    6.30
   0  -3 -15   25.10    9.00
  -1   3  15  183.28   16.10
   1  -3 -15  173.58   11.60
   1  -3 -15  165.38   16.70
   1  -3 -15  163.98   11.60
  -2   3  15   35.00    9.50
   2  -3 -15   32.90    9.20
   2  -3 -15   18.30    4.70
  -3   3  15   84.19   12.10
   3  -3 -15   88.89    6.50
   3  -3 -15  102.89   13.80
  -4   3  15   14.40    7.70
   4  -3 -15   17.00    7.50
   5  -3 -15   27.00    9.00
   6  -3 -15   -3.50    5.60
   6   3  14    8.50    7.70
  -6  -3 -14    4.20    7.30
  -6  -3 -14    3.20    7.00
  -6  -3 -14    1.40    6.40
   5   3  14  186.28   17.10
  -5  -3 -14  152.98   16.40
  -5  -3 -14  190.18   16.00
  -5  -3 -14  198.18   16.80
   4   3  14   26.70    8.90
  -4  -3 -14   18.70    7.20
  -4  -3 -14   10.90    6.50
  -4  -3 -14   18.60    8.10
   3   3  14   48.70   10.40
  -3  -3 -14   61.79    8.90
  -3  -3 -14   92.09   13.80
  -3  -3 -14   47.90    9.00
  -3  -3 -14   78.69   11.20
   2   3  14  150.98   15.50
  -2  -3 -14  147.49   12.40
  -2  -3 -14  148.29   14.80
  -2  -3 -14  131.69   12.50
  -2  -3 -14  149.19   12.60
   1   3  14  105.89   13.10
  -1  -3 -14   88.29   12.40
  -1  -3 -14   88.99   10.30
  -1  -3 -14  126.79   11.20
  -1  -3 -14  110.89   10.80
   0   3  14   22.20    7.80
   0  -3 -14   33.20    6.40
   0  -3 -14   41.20    9.40
   0  -3 -14   34.90    6.90
   0  -3 -14   38.50    6.90
  -1   3  14  114.99   13.30
   1  -3 -14  148.19   10.60
   1  -3 -14  143.89   10.50
   1  -3 -14  135.39    9.80
   1  -3 -14  120.29   14.40
  -2   3  14  119.19   13.10
   2  -3 -14  134.99   13.80
   2  -3 -14  105.19    8.50
   2  -3 -14  137.89    9.80
  -3   3  14   40.90    9.40
   3  -3 -14   42.50    5.30
   3  -3 -14   60.69   11.50
  -4   3  14  153.88   14.60
   4  -3 -14  223.38   16.80
  -5   3  14  117.19   13.20
   5  -3 -14  127.79   13.80
   6  -3 -14    6.30    6.40
   7  -3 -14   28.00    8.20
   7   3  13  156.18   15.30
  -7  -3 -13  118.19   15.20
  -7  -3 -13  138.49   15.30
   6   3  13  121.09   12.50
   6   3  13  114.39   13.80
  -6  -3 -13  112.79   14.00
  -6  -3 -13  118.39   14.20
  -6  -3 -13  130.09   14.60
   5   3  13    2.00    5.00
   5   3  13    2.20    5.70
  -5  -3 -13    5.80    5.90
  -5  -3 -13   -2.60    5.90
  -5  -3 -13   -6.90    5.40
   4   3  13   31.10    6.70
   4   3  13   28.50    9.00
  -4  -3 -13   38.20    8.50
  -4  -3 -13   21.70    8.20
  -4  -3 -13   26.70    7.10
  -4  -3 -13   44.20    8.50
   3   3  13   63.19    8.60
   3   3  13   67.19   11.60
  -3  -3 -13   55.69    8.90
  -3  -3 -13   64.39    9.60
  -3  -3 -13   69.39    9.80
  -3  -3 -13   70.89   11.30
   2   3  13    3.00    3.60
   2   3  13   11.90    6.90
  -2  -3 -13    2.20    5.00
  -2  -3 -13    7.10    5.40
  -2  -3 -13   -1.90    6.20
  -2  -3 -13    5.70    4.50
   1   3  13    4.30    6.10
  -1  -3 -13   -2.20    4.10
  -1  -3 -13    3.50    4.40
  -1  -3 -13    0.00    5.60
  -1  -3 -13    4.30    4.80
   0   3  13  182.68   14.90
   0  -3 -13  192.48   15.20
   0  -3 -13  179.98   11.60
   0  -3 -13  186.68   11.90
   0  -3 -13  188.58   11.60
  -1   3  13   74.99   10.80
   1  -3 -13   81.19   11.90
   1  -3 -13   69.39    7.60
   1  -3 -13   68.79    8.10
   1  -3 -13   79.89    8.20
  -2   3  13   12.40    6.50
   2  -3 -13   18.20    4.80
   2  -3 -13   14.50    7.10
   2  -3 -13   21.00    4.60
   2  -3 -13   25.10    4.50
  -3   3  13    2.10    5.90
   3  -3 -13    3.10    2.70
   3  -3 -13    1.70    6.10
   3  -3 -13    4.20    3.30
  -4   3  13    3.20    5.60
   4  -3 -13   -3.20    5.20
  -5   3  13   72.59   10.90
   5  -3 -13   72.59   11.10
   6  -3 -13   66.59   10.20
   7  -3 -13   28.20    7.90
   8  -3 -13    9.20    6.00
   9  -3 -13   -0.90    4.90
   8   3  12    4.80    6.00
  -8  -3 -12    4.40    7.50
  -8  -3 -12    3.70    7.40
   7   3  12    7.60    6.40
   7   3  12   16.30    7.10
  -7  -3 -12   15.10    7.60
  -7  -3 -12   32.90    9.00
   6   3  12   75.99   10.50
   6   3  12   91.59   12.10
  -6  -3 -12   62.09   10.50
  -6  -3 -12   93.19   12.20
  -6  -3 -12   94.29   12.70
   5   3  12   48.90    9.10
   5   3  12   49.00    8.50
  -5  -3 -12   52.79    9.60
  -5  -3 -12   45.10    9.20
  -5  -3 -12   57.59   10.70
   4   3  12  279.47   15.10
   4   3  12  239.08   17.00
  -4  -3 -12  226.58   15.70
  -4  -3 -12  266.57   16.40
  -4  -3 -12  233.68   16.90
  -4  -3 -12  254.77   14.60
   3   3  12   20.60    5.60
   3   3  12    6.50    5.70
  -3  -3 -12   16.90    6.90
  -3  -3 -12   19.90    5.90
  -3  -3 -12   18.30    6.70
   2   3  12    1.40    3.30
   2   3  12    6.80    5.30
  -2  -3 -12   -7.10    5.20
  -2  -3 -12   -1.50    4.40
  -2  -3 -12   -3.60    4.00
   1   3  12    2.10    5.60
   1   3  12    2.90    3.10
  -1  -3 -12    2.80    4.10
  -1  -3 -12    0.90    4.20
  -1  -3 -12   -1.60    6.00
   0   3  12   59.99    5.30
   0   3  12   51.99    9.30
   0  -3 -12   59.09    7.70
   0  -3 -12   57.39    7.90
   0  -3 -12   78.49   11.10
  -1   3  12    1.20    4.80
   1  -3 -12    5.50    6.10
   1  -3 -12    6.10    4.10
   1  -3 -12   -0.10    3.40
   1  -3 -12    1.50    3.10
  -2   3  12  366.96   18.90
   2  -3 -12  335.57   13.80
   2  -3 -12  311.97   13.10
   2  -3 -12  328.07   18.30
   2  -3 -12  320.17   12.60
  -3   3  12   14.20    6.40
   3  -3 -12    9.60    5.60
   3  -3 -12   16.60    3.80
   3  -3 -12   14.60    3.10
   3  -3 -12   11.90    2.80
  -4   3  12   57.69    9.10
   4  -3 -12   37.30    8.40
  -5   3  12   33.80    7.50
   5  -3 -12   23.00    7.00
  -6   3  12  168.08   13.10
   6  -3 -12  190.88   13.90
   7  -3 -12   31.60    7.60
   8  -3 -12  101.39   11.00
   9  -3 -12   53.19    8.40
   9   3  11   14.70    7.10
  -9  -3 -11   30.60    9.60
  -9  -3 -11   26.20    9.90
   8   3  11   13.60    7.30
   8   3  11   17.70    7.40
  -8  -3 -11   29.00    9.00
  -8  -3 -11   32.60    9.10
   7   3  11    9.10    6.10
   7   3  11   -4.30    4.80
  -7  -3 -11    5.20    6.50
  -7  -3 -11    4.50    6.00
  -7  -3 -11   -0.70    6.30
   6   3  11  344.47   18.90
   6   3  11  336.27   19.20
  -6  -3 -11  338.37   20.00
  -6  -3 -11  366.66   20.40
  -6  -3 -11  362.06   19.80
   5   3  11  146.59   13.10
   5   3  11  156.88   12.50
  -5  -3 -11  160.48   13.80
  -5  -3 -11  158.18   13.90
  -5  -3 -11  132.29   13.10
   4   3  11   45.10    8.60
   4   3  11   41.30    7.10
  -4  -3 -11   42.00    8.30
  -4  -3 -11   38.00    6.90
  -4  -3 -11   28.90    7.30
   3   3  11  313.27   15.00
   3   3  11  335.97   18.60
  -3  -3 -11  317.87   15.30
  -3  -3 -11  329.97   17.00
  -3  -3 -11  338.77   18.60
   2   3  11  115.79   11.40
   2   3  11  138.29    9.30
  -2  -3 -11  125.69   10.70
  -2  -3 -11  130.19   10.50
  -2  -3 -11  114.79   11.70
   1   3  11   72.29    9.70
   1   3  11   56.49    6.30
  -1  -3 -11   58.69    8.20
  -1  -3 -11   59.49    9.30
  -1  -3 -11   78.79    8.70
   0   3  11  313.07   17.20
   0   3  11  289.57   11.10
   0  -3 -11  291.17   13.60
   0  -3 -11  284.87   13.80
   0  -3 -11  305.17   17.10
  -1   3  11   56.49    4.20
  -1   3  11   49.99    8.80
  -1   3  11   66.59    8.10
   1  -3 -11   59.69    7.10
   1  -3 -11   51.29    6.50
   1  -3 -11   51.69    8.50
  -2   3  11   41.50    7.50
  -2   3  11   27.30    4.70
   2  -3 -11   25.80    4.60
   2  -3 -11   30.60    7.10
   2  -3 -11   39.00    5.80
   2  -3 -11   30.50    4.30
  -3   3  11  144.39   12.20
  -3   3  11  140.79    7.80
   3  -3 -11  152.08   12.50
   3  -3 -11  130.99    6.10
   3  -3 -11  145.59    7.90
   3  -3 -11  137.59    6.30
   3  -3 -11  131.49    6.80
  -4   3  11  107.39   10.70
   4  -3 -11  114.59   11.30
  -5   3  11    6.10    4.90
   5  -3 -11    4.50    5.20
  -6   3  11   85.29    9.50
   6  -3 -11   95.29   10.10
   7  -3 -11   16.60    5.90
   8  -3 -11   12.50    5.40
   9  -3 -11   19.70    5.90
  10  -3 -11  130.39   10.60
  10   3  10  202.98   15.00
 -10  -3 -10  211.38   18.90
 -10  -3 -10  167.68   17.80
   9   3  10    6.40    5.80
   9   3  10   -2.70    6.00
  -9  -3 -10    3.70    6.40
  -9  -3 -10   -3.20    6.60
   8   3  10    2.80    6.10
   8   3  10   -1.30    4.90
  -8  -3 -10    1.20    6.30
  -8  -3 -10   -4.90    6.20
   7   3  10   25.30    7.20
   7   3  10   28.70    7.70
  -7  -3 -10   22.60    7.00
  -7  -3 -10   29.50    8.50
  -7  -3 -10   21.60    7.60
   6   3  10   24.80    6.90
   6   3  10   19.50    6.60
  -6  -3 -10   14.70    6.10
  -6  -3 -10   14.80    6.20
  -6  -3 -10    7.90    6.50
   5   3  10   11.60    5.00
   5   3  10    6.50    5.40
  -5  -3 -10    0.60    4.60
  -5  -3 -10    2.60    5.20
  -5  -3 -10   -3.70    4.10
  -5  -3 -10    3.80    4.60
   4   3  10    0.80    4.40
   4   3  10    4.00    4.90
  -4  -3 -10    5.60    4.60
  -4  -3 -10    9.30    6.20
  -4  -3 -10    3.50    5.40
   3   3  10   24.60    6.70
   3   3  10   36.60    6.10
  -3  -3 -10   22.20    6.70
  -3  -3 -10   31.10    6.70
  -3  -3 -10   28.70    6.00
   2   3  10   69.59   10.20
   2   3  10   47.50    6.70
  -2  -3 -10   59.49    8.30
  -2  -3 -10   44.90    8.10
  -2  -3 -10   36.10    6.60
   1   3  10  327.87   12.80
   1   3  10  318.97   16.90
  -1  -3 -10  305.37   14.70
  -1  -3 -10  316.07   16.90
  -1  -3 -10  342.97   14.70
   0   3  10   81.19    5.90
   0   3  10   83.59   10.40
   0  -3 -10   80.29    8.20
   0  -3 -10   89.39   10.80
   0  -3 -10   73.69    7.70
  -1   3  10   80.39    4.80
  -1   3  10   77.69    8.40
  -1   3  10   68.99    9.00
   1  -3 -10   90.69    7.40
   1  -3 -10   77.19   10.50
   1  -3 -10   72.69    7.50
  -2   3  10    1.40    2.70
  -2   3  10    4.30    4.40
   2  -3 -10    2.40    3.00
   2  -3 -10   -3.50    2.80
   2  -3 -10   -0.50    2.30
   2  -3 -10   -4.60    4.20
  -3   3  10    3.30    2.70
  -3   3  10   -1.80    4.30
   3  -3 -10    3.80    5.40
   3  -3 -10    0.20    2.50
   3  -3 -10    2.50    2.40
   3  -3 -10    3.80    2.10
   3  -3 -10    3.10    1.90
  -4   3  10  108.89   10.20
  -4   3  10   83.99    5.60
   4  -3 -10   89.39    9.90
  -5   3  10  185.38    7.70
  -5   3  10  226.18   13.00
   5  -3 -10  198.48   12.90
   5  -3 -10  199.08   12.50
  -6   3  10   60.59    8.00
   6  -3 -10   68.39    9.10
  -7   3  10  107.79   10.70
   7  -3 -10   90.09    9.60
   8  -3 -10   -8.10    3.60
   9  -3 -10    2.70    4.20
  10  -3 -10   34.50    5.90
  11  -3 -10   75.69    7.00
  10   3   9   16.30    6.40
 -10  -3  -9   15.30    8.30
 -10  -3  -9   17.80    9.30
   9   3   9   70.49   11.60
   9   3   9   44.30    8.40
  -9  -3  -9   54.79   10.30
  -9  -3  -9   51.39   10.50
   8   3   9  224.38   14.30
   8   3   9  185.88   15.40
  -8  -3  -9  196.68   16.50
   7   3   9  199.68   13.90
   7   3   9  201.38   14.90
  -7  -3  -9  187.08   15.20
  -7  -3  -9  186.28   15.10
  -7  -3  -9  230.18   14.50
   6   3   9   -3.40    4.20
   6   3   9   -5.60    3.80
  -6  -3  -9    1.90    4.50
  -6  -3  -9    4.70    5.40
  -6  -3  -9    3.50    5.00
   5   3   9   90.29   10.30
   5   3   9   96.49   10.20
  -5  -3  -9   88.79   10.30
  -5  -3  -9  119.69   11.00
  -5  -3  -9   97.29    9.00
  -5  -3  -9  107.99   10.30
   4   3   9   38.30    7.60
   4   3   9   25.60    5.70
  -4  -3  -9   33.30    6.40
  -4  -3  -9   32.20    7.20
  -4  -3  -9   28.20    5.70
  -4  -3  -9   20.90    6.50
   3   3   9   11.00    5.40
   3   3   9   10.40    4.30
  -3  -3  -9   13.60    5.50
  -3  -3  -9   13.80    4.80
  -3  -3  -9   12.20    5.40
   2   3   9  154.18    9.50
   2   3   9  150.48   12.00
  -2  -3  -9  167.98   10.30
  -2  -3  -9  162.28   10.90
  -2  -3  -9  152.48   11.70
   1   3   9  255.17   14.30
   1   3   9  265.07   11.00
  -1  -3  -9  251.67   14.40
  -1  -3  -9  244.58   12.10
  -1  -3  -9  239.08   12.20
   0   3   9  137.69    9.10
   0   3   9  148.19   11.60
   0   3   9  136.99    7.20
   0  -3  -9  163.38   12.00
   0  -3  -9  133.89    8.80
   0  -3  -9  152.68    9.30
  -1   3   9  244.18    8.50
  -1   3   9  241.98   11.70
  -1   3   9  236.38   13.80
  -1   3   9  238.28   10.30
   1  -3  -9  227.28   13.40
   1  -3  -9  223.48   10.70
   1  -3  -9  248.88   10.70
  -2   3   9  148.39   11.00
  -2   3   9  126.99    7.10
  -2   3   9  133.89    4.90
   2  -3  -9  126.39    7.50
   2  -3  -9  144.29   11.30
   2  -3  -9  148.79    7.70
  -3   3   9   -4.90    3.50
  -3   3   9    3.70    2.40
   3  -3  -9    2.50    1.60
   3  -3  -9    5.30    4.80
   3  -3  -9    3.80    1.80
   3  -3  -9    0.90    3.80
   3  -3  -9   -1.50    2.10
   3  -3  -9    1.30    2.00
  -4   3   9  129.59   10.30
  -4   3   9  152.88    6.80
   4  -3  -9  166.28   11.40
   4  -3  -9  145.49   10.60
  -5   3   9  192.98   11.70
  -5   3   9  206.08    7.70
  -5   3   9  198.98    6.90
   5  -3  -9  188.38   11.80
   5  -3  -9  206.18   12.40
  -6   3   9   47.60    4.50
  -6   3   9   49.90    4.30
  -6   3   9   49.00    6.90
   6  -3  -9   58.59    7.70
   6  -3  -9   56.29    7.50
  -7   3   9  131.49    9.60
  -7   3   9  153.08    7.70
   7  -3  -9  135.19    9.90
   8  -3  -9   62.69    7.50
   9  -3  -9    6.70    3.90
  10  -3  -9  110.89    8.00
  11   3   8   35.50    7.50
 -11  -3  -8   32.80   10.20
 -11  -3  -8   44.80   10.70
  10   3   8   58.49    8.40
 -10  -3  -8   48.90   11.10
 -10  -3  -8   64.79   11.20
   9   3   8   66.49   10.70
   9   3   8   87.99    9.90
  -9  -3  -8   85.09   12.80
  -9  -3  -8   64.79   10.40
   8   3   8  136.39   11.50
   8   3   8  121.89   13.20
  -8  -3  -8  147.49   14.10
  -8  -3  -8  138.49   14.00
  -8  -3  -8  138.19   11.10
   7   3   8  303.77   17.50
   7   3   8  277.07   15.40
  -7  -3  -8  293.37   15.50
  -7  -3  -8  275.97   17.30
  -7  -3  -8  294.77   17.10
   6   3   8  114.19   10.10
   6   3   8  110.09   10.40
   6   3   8   94.49   10.60
  -6  -3  -8  114.79    9.10
  -6  -3  -8   97.19   10.70
  -6  -3  -8   97.49   11.50
  -6  -3  -8   85.59    9.30
  -6  -3  -8   95.69   11.00
   5   3   8  139.29   11.20
   5   3   8  143.79   11.20
  -5  -3  -8  140.49   11.30
  -5  -3  -8  134.69   11.00
  -5  -3  -8  124.29   11.90
  -5  -3  -8  155.48    9.80
   4   3   8   29.70    6.10
   4   3   8   21.80    5.40
  -4  -3  -8   26.30    5.60
  -4  -3  -8   32.00    5.60
  -4  -3  -8   27.10    6.20
  -4  -3  -8   31.40    6.50
   3   3   8  174.08   10.60
   3   3   8  196.48   12.40
  -3  -3  -8  190.18   11.70
  -3  -3  -8  184.48   12.30
  -3  -3  -8  197.48   10.40
   2   3   8   67.79    8.10
   2   3   8   62.59    6.60
  -2  -3  -8   82.79    8.00
  -2  -3  -8   72.39    7.30
  -2  -3  -8   63.79    8.70
   1   3   8  677.83   20.30
   1   3   8  660.93   24.00
  -1  -3  -8  685.93   20.80
  -1  -3  -8  631.14   23.50
  -1  -3  -8  663.33   21.60
   0   3   8   37.50    5.10
   0   3   8   50.89    7.20
   0   3   8   43.50    4.50
   0  -3  -8   37.20    5.10
   0  -3  -8   44.20    6.00
   0  -3  -8   28.90    5.90
  -1   3   8   61.99    4.30
  -1   3   8   57.69    6.30
  -1   3   8   52.99    7.40
  -1   3   8   61.19    5.30
   1  -3  -8   71.89    6.20
   1  -3  -8   77.59    7.90
   1  -3  -8   62.99    5.70
  -2   3   8   -0.50    1.40
  -2   3   8    0.80    2.10
  -2   3   8   -1.00    3.40
  -2   3   8   -1.90    2.90
   2  -3  -8    3.80    3.40
   2  -3  -8   -1.50    3.40
   2  -3  -8    2.10    2.50
   2  -3  -8   -1.10    2.20
  -3   3   8  383.76   11.60
  -3   3   8  375.46   15.90
   3  -3  -8  360.06   11.60
   3  -3  -8  362.96    9.80
   3  -3  -8  356.36    9.80
   3  -3  -8  376.26   16.20
   3  -3  -8  362.36   10.20
   3  -3  -8  371.56   15.90
  -4   3   8   65.49    7.70
  -4   3   8   65.99    3.90
  -4   3   8   70.59    4.50
   4  -3  -8   66.49    7.90
   4  -3  -8   67.29    7.90
  -5   3   8   16.40    2.70
  -5   3   8   17.10    2.80
  -5   3   8   14.20    4.60
   5  -3  -8   19.40    4.90
   5  -3  -8   19.80    5.40
  -6   3   8   14.90    2.90
  -6   3   8   11.00    2.90
  -6   3   8    3.60    3.80
   6  -3  -8    9.30    4.40
   6  -3  -8   10.20    4.20
  -7   3   8   10.70    3.10
  -7   3   8   15.90    3.70
  -7   3   8   27.10    4.90
   7  -3  -8   19.70    4.60
   7  -3  -8    6.70    3.50
  -8   3   8   41.40    5.60
   8  -3  -8   57.29    6.70
   9  -3  -8  323.07   13.20
  10  -3  -8   81.39    6.10
  11   3   7   35.40    6.70
 -11  -3  -7   36.30    9.60
 -11  -3  -7   26.50    9.70
  10   3   7   42.10   10.00
  10   3   7   14.30    5.50
 -10  -3  -7   40.90    9.70
 -10  -3  -7   14.50    8.00
   9   3   7   21.00    5.50
   9   3   7    9.90    6.60
  -9  -3  -7   -1.10    6.80
  -9  -3  -7    5.20    6.90
   8   3   7   97.99   11.70
   8   3   7  114.69   10.00
  -8  -3  -7   96.19   12.00
  -8  -3  -7   98.69   12.20
  -8  -3  -7   98.29    9.40
   7   3   7   50.19    7.70
   7   3   7   42.00    8.30
   7   3   7   57.79    8.50
  -7  -3  -7   78.19    8.80
  -7  -3  -7   47.80    8.10
  -7  -3  -7   74.79   10.90
   6   3   7    1.20    4.40
   6   3   7    7.30    4.60
   6   3   7    7.80    4.50
  -6  -3  -7    4.70    5.50
  -6  -3  -7   -0.60    4.50
  -6  -3  -7   10.20    6.20
  -6  -3  -7   -0.50    4.20
   5   3   7    1.30    3.40
   5   3   7   -3.20    4.00
   5   3   7    2.20    4.10
  -5  -3  -7    6.90    5.10
  -5  -3  -7    2.90    4.20
  -5  -3  -7    5.30    4.40
   4   3   7   28.10    6.30
   4   3   7   25.40    5.50
   4   3   7   31.60    6.10
  -4  -3  -7   19.70    5.40
  -4  -3  -7   16.40    4.00
  -4  -3  -7   26.20    6.30
  -4  -3  -7   33.80    5.70
   3   3   7   36.60    5.30
   3   3   7   35.30    5.90
   3   3   7   26.80    5.70
  -3  -3  -7   41.30    5.80
  -3  -3  -7   37.60    6.10
  -3  -3  -7   28.20    5.00
  -3  -3  -7   33.50    5.90
   2   3   7  103.89    8.60
   2   3   7  136.39    8.10
   2   3   7  130.09    9.10
  -2  -3  -7  121.79    8.50
  -2  -3  -7  130.19    9.30
  -2  -3  -7  131.99    8.00
   1   3   7  370.06   12.90
   1   3   7  376.46   15.90
  -1  -3  -7  360.26   13.20
  -1  -3  -7  364.66   13.80
  -1  -3  -7  354.76   15.40
   0   3   7  161.08    8.30
   0   3   7  150.48    6.80
   0   3   7  132.09    9.70
   0  -3  -7  138.29    7.80
   0  -3  -7  163.28    8.00
   0  -3  -7  148.59    9.60
   0  -3  -7  157.38   10.10
  -1   3   7   14.00    3.30
  -1   3   7   19.20    2.50
  -1   3   7   19.30    3.10
  -1   3   7   10.50    3.90
   1  -3  -7   21.00    3.40
   1  -3  -7   19.60    3.50
   1  -3  -7   23.70    4.50
   1  -3  -7   20.00    4.60
  -2   3   7  419.46   16.50
  -2   3   7  439.16   12.80
  -2   3   7  413.76   14.00
   2  -3  -7  405.66   16.20
   2  -3  -7  422.96   12.80
   2  -3  -7  449.16   16.70
   2  -3  -7  410.66   12.70
  -3   3   7  118.89    5.20
  -3   3   7   98.99    8.00
   3  -3  -7  116.59    8.50
   3  -3  -7  108.09    5.10
   3  -3  -7  116.69    8.40
  -4   3   7  474.85   17.60
  -4   3   7  488.95   13.60
  -4   3   7  493.15   14.00
   4  -3  -7  498.15   17.80
   4  -3  -7  502.45   18.00
  -5   3   7  132.49    6.70
  -5   3   7  118.49    8.30
  -5   3   7  134.59    5.90
   5  -3  -7  135.09    8.70
   5  -3  -7  116.59    8.60
  -6   3   7   92.39    7.30
  -6   3   7  108.19    7.00
  -6   3   7  102.49    5.70
   6  -3  -7  103.29    8.00
   6  -3  -7   98.29    7.50
  -7   3   7   73.49    5.70
  -7   3   7   70.69    6.70
  -7   3   7   56.09    6.00
   7  -3  -7   64.79    6.30
   7  -3  -7   55.99    6.60
  -8   3   7   50.49    5.30
  -8   3   7   51.29    7.00
  -8   3   7   40.40    5.40
   8  -3  -7   49.20    5.80
  -9   3   7  242.08   13.00
   9  -3  -7  235.88    9.80
 -10   3   7   73.69    7.40
  10  -3  -7   61.39    4.00
  12   3   6    4.90    4.00
 -12  -3  -6   16.20    8.40
 -12  -3  -6   16.80    8.00
  11   3   6   20.80    5.30
 -11  -3  -6   21.60    8.90
 -11  -3  -6   25.10    8.50
  10   3   6   53.59    9.80
  10   3   6   43.50    6.50
 -10  -3  -6   64.89   10.80
 -10  -3  -6   26.20    8.10
   9   3   6   73.99   10.80
   9   3   6   66.29    7.90
  -9  -3  -6   67.79   10.90
  -9  -3  -6   82.89   11.10
   8   3   6  386.36   20.30
   8   3   6  455.15   19.30
   8   3   6  431.36   17.60
  -8  -3  -6  403.46   20.10
  -8  -3  -6  394.36   16.70
  -8  -3  -6  449.66   21.10
   7   3   6   -2.10    4.70
   7   3   6    1.00    3.80
   7   3   6    1.00    3.90
  -7  -3  -6    4.10    5.20
  -7  -3  -6    1.30    4.00
  -7  -3  -6   -0.30    5.20
   6   3   6   23.20    5.30
   6   3   6   34.60    6.80
   6   3   6   37.70    6.10
  -6  -3  -6   24.30    6.30
  -6  -3  -6   40.70    7.60
  -6  -3  -6   21.00    5.90
  -6  -3  -6   24.90    5.40
   5   3   6   24.80    5.70
   5   3   6   29.20    5.40
   5   3   6   25.50    5.40
  -5  -3  -6   26.90    5.90
  -5  -3  -6   34.80    5.80
  -5  -3  -6   35.00    6.20
   4   3   6   38.30    6.20
   4   3   6   32.30    5.60
   4   3   6   41.60    6.10
  -4  -3  -6   38.00    6.00
  -4  -3  -6   34.40    5.70
  -4  -3  -6   39.60    6.20
   3   3   6  409.46   15.60
   3   3   6  343.57   14.30
   3   3   6  344.47   14.80
  -3  -3  -6  377.66   15.20
  -3  -3  -6  367.46   14.40
  -3  -3  -6  367.86   15.30
  -3  -3  -6  366.06   13.00
   2   3   6  207.78   10.50
   2   3   6  216.28    9.70
   2   3   6  195.78   10.60
  -2  -3  -6  209.18   10.30
  -2  -3  -6  206.78   10.80
  -2  -3  -6  208.98    9.30
  -2  -3  -6  215.08    9.70
   1   3   6   20.00    3.50
   1   3   6   16.20    4.20
   1   3   6   21.70    4.30
  -1  -3  -6   13.40    3.40
  -1  -3  -6   12.50    4.10
  -1  -3  -6   27.00    4.80
  -1  -3  -6   20.90    3.80
   0   3   6  328.97   13.90
   0   3   6  356.06   13.80
   0   3   6  356.06   12.10
   0   3   6  343.47   11.20
   0  -3  -6  345.57   12.00
   0  -3  -6  374.16   14.20
   0  -3  -6  333.37   14.00
   0  -3  -6  373.76   12.20
  -1   3   6    3.00    1.70
  -1   3   6    2.60    2.60
  -1   3   6    3.90    3.10
  -1   3   6    3.20    1.90
  -1   3   6    4.70    2.90
   1  -3  -6    4.50    2.10
   1  -3  -6    4.50    3.20
   1  -3  -6    2.60    2.90
   1  -3  -6    4.20    2.40
  -2   3   6  171.98    6.30
  -2   3   6  163.38    9.00
  -2   3   6  176.18    7.70
  -2   3   6  166.08    9.30
   2  -3  -6  182.68    9.50
   2  -3  -6  176.88    6.50
   2  -3  -6  183.48    9.70
   2  -3  -6  170.28    6.60
   2  -3  -6  172.78    5.80
  -3   3   6  273.97    8.20
  -3   3   6  280.97   11.80
   3  -3  -6  264.47   11.50
   3  -3  -6  243.58   11.40
  -4   3   6  116.89    4.90
  -4   3   6  122.39    5.90
  -4   3   6  120.19    7.40
   4  -3  -6  109.99    7.80
   4  -3  -6  118.39    7.70
  -5   3   6    6.80    2.20
  -5   3   6    9.40    3.20
  -5   3   6    5.90    2.60
   5  -3  -6    4.80    3.20
   5  -3  -6    7.50    3.20
  -6   3   6  119.89    6.30
  -6   3   6  123.49    7.60
  -6   3   6  126.99    7.40
   6  -3  -6  110.59    7.50
   6  -3  -6  132.99    7.60
  -7   3   6  165.98    5.40
  -7   3   6  171.28    9.70
  -7   3   6  158.48    7.90
  -7   3   6  149.69    7.70
   7  -3  -6  164.38    8.40
  -8   3   6    5.90    3.30
  -8   3   6    6.60    4.10
  -8   3   6    6.00    2.20
  -8   3   6    5.80    2.50
   8  -3  -6    4.60    2.50
   8  -3  -6    6.30    2.80
  -9   3   6   96.89    5.90
  -9   3   6   80.99    9.00
   9  -3  -6   93.59    4.90
   9  -3  -6   96.99    5.00
 -10   3   6    8.50    4.10
 -10   3   6    3.50    4.70
 -11   3   6   -4.00    4.00
  12   3   5   22.70    4.40
 -12  -3  -5   12.90    8.30
 -12  -3  -5   17.90    9.00
  11   3   5    1.30    3.60
  11   3   5   12.30    6.80
 -11  -3  -5   -5.40    5.20
 -11  -3  -5    8.80    7.00
  10   3   5   26.80    5.00
  10   3   5   18.60    7.40
 -10  -3  -5    5.00    6.80
 -10  -3  -5   10.20    6.80
   9   3   5   32.80    8.40
   9   3   5   33.90    5.60
  -9  -3  -5   34.10    8.00
  -9  -3  -5   28.80    7.70
   8   3   5  278.77   12.60
   8   3   5  246.78   12.50
   8   3   5  267.87   16.60
  -8  -3  -5  274.67   16.90
  -8  -3  -5  281.57   12.60
  -8  -3  -5  280.77   16.80
   7   3   5   57.59    8.80
   7   3   5   52.39    7.10
   7   3   5   62.09    6.90
  -7  -3  -5   69.49    9.30
  -7  -3  -5   56.59    8.50
  -7  -3  -5   60.29    6.90
  -7  -3  -5   61.49    8.90
   6   3   5   91.49    7.80
   6   3   5   82.79    9.70
   6   3   5   97.59    7.90
  -6  -3  -5   93.99    9.90
  -6  -3  -5  101.49    7.90
  -6  -3  -5   96.99    9.60
  -6  -3  -5   84.99   10.00
   5   3   5    0.60    3.40
   5   3   5    1.80    2.90
   5   3   5    0.50    3.30
  -5  -3  -5   -0.70    3.60
  -5  -3  -5    0.50    3.30
  -5  -3  -5    1.20    4.20
   4   3   5  138.29    8.40
   4   3   5  100.09    7.50
   4   3   5  129.59    8.90
  -4  -3  -5  127.69    8.90
  -4  -3  -5  126.89    9.30
  -4  -3  -5  115.99    8.10
   3   3   5   33.00    5.00
   3   3   5   29.00    4.90
   3   3   5   26.20    4.80
  -3  -3  -5   30.10    4.60
  -3  -3  -5   27.30    4.40
  -3  -3  -5   28.10    5.00
   2   3   5  322.97   13.00
   2   3   5  324.17   12.90
   2   3   5  331.87   12.20
  -2  -3  -5  310.27   11.90
  -2  -3  -5  325.17   11.10
  -2  -3  -5  317.57   12.70
  -2  -3  -5  308.77   12.30
  -2  -3  -5  322.77   13.10
   1   3   5  218.48    8.80
   1   3   5  227.28   10.60
   1   3   5  226.18   10.10
  -1  -3  -5  214.18    8.70
  -1  -3  -5  213.78   10.10
  -1  -3  -5  211.88    9.20
  -1  -3  -5  222.68   10.30
   0   3   5   80.69    5.40
   0   3   5   87.39    6.20
   0   3   5   75.89    4.70
   0   3   5   71.99    6.20
   0  -3  -5   90.69    6.40
   0  -3  -5   74.19    5.00
   0  -3  -5   79.09    6.40
   0  -3  -5   83.19    5.40
  -1   3   5   14.20    2.20
  -1   3   5   14.40    3.70
  -1   3   5    9.50    2.50
  -1   3   5   16.30    3.70
   1  -3  -5   11.10    3.70
   1  -3  -5   13.40    2.30
   1  -3  -5   17.40    3.80
   1  -3  -5   13.70    2.60
  -2   3   5  291.07   11.20
  -2   3   5  282.87    9.60
  -2   3   5  289.27    8.40
  -2   3   5  302.37   11.70
   2  -3  -5  291.27    7.80
   2  -3  -5  292.07   11.40
   2  -3  -5  318.37   12.00
   2  -3  -5  301.47    8.50
   2  -3  -5  297.87    8.50
  -3   3   5   52.59    5.20
  -3   3   5   67.49    5.40
  -3   3   5   58.89    3.10
  -3   3   5   56.59    3.90
   3  -3  -5   55.79    5.30
   3  -3  -5   47.70    5.20
  -4   3   5  104.99    6.40
  -4   3   5  104.99    4.60
  -4   3   5   89.89    6.10
  -4   3   5  101.29    5.60
   4  -3  -5   98.99    6.30
   4  -3  -5  100.59    6.60
  -5   3   5    4.90    2.50
  -5   3   5    7.60    1.30
  -5   3   5    9.90    2.90
  -5   3   5    4.10    2.50
  -5   3   5    6.40    2.10
   5  -3  -5    7.30    2.70
   5  -3  -5    7.80    2.80
  -6   3   5   77.19    6.40
  -6   3   5   59.59    3.60
  -6   3   5   63.69    4.90
   6  -3  -5   66.89    5.30
  -7   3   5  128.69    9.00
  -7   3   5  111.89    5.80
  -7   3   5  104.79    5.60
   7  -3  -5  121.09    6.20
   7  -3  -5  114.59    6.20
  -8   3   5   91.89    8.70
  -8   3   5   81.59    4.00
  -8   3   5   84.59    6.00
   8  -3  -5   86.49    4.60
   8  -3  -5   82.39    4.60
  -9   3   5  348.37   16.30
  -9   3   5  334.57   12.70
 -10   3   5   -0.20    3.30
 -10   3   5   -1.60    3.80
 -10   3   5    1.60    4.70
 -11   3   5    2.50    4.40
 -12   3   5   40.30    8.00
 -12  -3  -4   23.10    8.30
 -12  -3  -4   15.50    8.10
  11   3   4   46.80   10.20
  11   3   4   53.89    5.90
 -11  -3  -4   37.70    9.20
 -11  -3  -4   46.30    9.50
  10   3   4   17.80    7.10
  10   3   4   22.00    4.40
 -10  -3  -4   26.90    8.10
 -10  -3  -4   23.70    8.00
   9   3   4   63.19    9.70
   9   3   4   76.19    6.70
  -9  -3  -4   70.59   10.00
  -9  -3  -4   65.79    9.60
   8   3   4   23.80    4.30
   8   3   4   33.90    5.10
   8   3   4   23.60    6.30
  -8  -3  -4   27.50    4.60
  -8  -3  -4   13.40    6.10
  -8  -3  -4   25.00    7.10
   7   3   4    7.70    3.50
   7   3   4    6.20    3.60
   7   3   4    3.60    5.00
  -7  -3  -4    8.00    5.50
  -7  -3  -4   15.10    6.10
  -7  -3  -4    6.80    3.30
  -7  -3  -4    4.50    4.90
   6   3   4  107.39    7.70
   6   3   4  108.39    7.60
   6   3   4  117.89   10.10
  -6  -3  -4  101.39    9.10
  -6  -3  -4  124.49    7.80
  -6  -3  -4  114.19   10.10
  -6  -3  -4  127.59   10.30
   5   3   4  134.69    7.90
   5   3   4  132.29    8.00
   5   3   4  134.89    9.40
  -5  -3  -4  134.69    8.00
  -5  -3  -4  126.29    9.50
  -5  -3  -4  147.09    9.80
   4   3   4  116.19    7.30
   4   3   4  103.09    7.70
   4   3   4  121.89    7.60
  -4  -3  -4  119.19    7.20
  -4  -3  -4  104.69    7.20
  -4  -3  -4  114.09    7.80
   3   3   4  590.04   19.00
   3   3   4  617.94   19.10
   3   3   4  564.34   19.00
  -3  -3  -4  641.04   19.10
  -3  -3  -4  594.94   18.80
  -3  -3  -4  611.24   19.20
  -3  -3  -4  599.24   19.50
   2   3   4   32.70    4.60
   2   3   4   43.80    5.20
   2   3   4   25.70    3.90
  -2  -3  -4   37.00    4.50
  -2  -3  -4   33.30    4.90
  -2  -3  -4   33.20    4.70
  -2  -3  -4   36.70    5.30
   1   3   4  137.69    7.70
   1   3   4  145.89    6.70
   1   3   4  148.39    8.00
  -1  -3  -4  150.68    7.80
  -1  -3  -4  139.09    7.40
  -1  -3  -4  125.49    6.70
   0   3   4    2.10    2.90
   0   3   4    2.50    2.40
   0   3   4   -0.10    2.40
   0  -3  -4    1.50    2.70
   0  -3  -4   -1.50    1.90
   0  -3  -4    2.10    2.10
   0  -3  -4   -1.00    2.60
  -1   3   4  489.75   12.80
  -1   3   4  476.45   15.60
  -1   3   4  473.75   13.50
  -1   3   4  508.15   15.50
   1  -3  -4  489.85   13.20
   1  -3  -4  496.75   12.90
   1  -3  -4  509.65   15.70
   1  -3  -4  482.75   12.80
   1  -3  -4  464.15   15.40
  -2   3   4  394.56   13.00
  -2   3   4  392.56   11.00
  -2   3   4  390.86   13.10
  -2   3   4  402.06   10.10
   2  -3  -4  403.56   13.10
   2  -3  -4  392.96    9.40
   2  -3  -4  399.06   10.10
   2  -3  -4  394.16    9.40
   2  -3  -4  369.46   13.00
  -3   3   4  473.85   14.40
  -3   3   4  466.45   11.90
  -3   3   4  467.95   11.80
  -3   3   4  463.55   14.40
   3  -3  -4  439.46   14.40
   3  -3  -4  451.05   14.30
  -4   3   4  108.29    3.40
  -4   3   4  111.19    5.70
  -4   3   4  109.39    6.10
  -4   3   4  113.39    5.90
   4  -3  -4  112.69    6.00
   4  -3  -4  100.39    5.80
  -5   3   4   98.59    5.20
  -5   3   4  104.69    4.50
  -5   3   4  118.49    5.60
  -5   3   4  101.59    6.70
   5  -3  -4   96.09    5.50
  -6   3   4   21.10    3.10
  -6   3   4   22.50    4.30
  -6   3   4   22.50    2.90
  -6   3   4   21.30    3.00
   6  -3  -4   19.70    2.80
   6  -3  -4   23.90    3.40
  -7   3   4  100.39    6.30
  -7   3   4   99.09    4.10
  -7   3   4   98.49    4.10
  -7   3   4   96.59    8.30
   7  -3  -4  108.19    4.60
   7  -3  -4   93.49    4.50
  -8   3   4  659.33   23.40
  -8   3   4  665.43   20.20
  -9   3   4   80.39    7.10
  -9   3   4   90.89    9.70
 -10   3   4   25.10    5.10
 -10   3   4   21.50    5.70
 -11   3   4  136.49   10.40
 -11   3   4  149.29   11.40
 -12   3   4   23.90    6.70
 -13  -3  -3    1.60    7.20
 -13  -3  -3   -1.30    7.00
 -12  -3  -3   79.69   11.80
 -12  -3  -3   95.09   13.60
  11   3   3  118.19   14.00
  11   3   3   93.49    5.50
 -11  -3  -3  104.19   13.10
 -11  -3  -3  102.99   13.10
  10   3   3  227.98   16.10
  10   3   3  222.18    9.60
 -10  -3  -3  227.58   16.00
 -10  -3  -3  203.68   15.40
   9   3   3   91.69    6.20
   9   3   3  103.99   11.70
   9   3   3  100.59    6.80
  -9  -3  -3  115.69   11.80
  -9  -3  -3   89.99   11.30
  -9  -3  -3  100.59    6.50
   8   3   3    8.70    3.30
   8   3   3   10.50    6.00
  -8  -3  -3   12.70    3.30
  -8  -3  -3    8.00    5.50
   7   3   3   70.89    6.10
   7   3   3   65.29    6.20
   7   3   3   81.29    9.30
  -7  -3  -3   62.99    8.30
  -7  -3  -3   66.99    8.50
  -7  -3  -3   74.29    5.90
   6   3   3    0.50    3.90
   6   3   3    0.20    2.60
   6   3   3    3.90    2.60
  -6  -3  -3    0.50    2.40
  -6  -3  -3    2.50    4.20
  -6  -3  -3    1.60    4.50
   5   3   3   25.30    4.00
   5   3   3   16.80    4.70
   5   3   3   24.20    3.70
  -5  -3  -3   29.20    4.30
  -5  -3  -3   20.80    4.40
  -5  -3  -3   19.10    4.50
  -5  -3  -3   16.90    3.40
   4   3   3  524.45   16.00
   4   3   3  481.95   17.40
   4   3   3  479.05   15.90
  -4  -3  -3  486.75   17.10
  -4  -3  -3  487.65   17.10
  -4  -3  -3  514.65   15.90
  -4  -3  -3  496.65   15.80
   3   3   3  228.68    9.20
   3   3   3  203.38    8.70
   3   3   3  210.78    9.60
  -3  -3  -3  210.98    9.70
  -3  -3  -3  215.08    8.90
  -3  -3  -3  209.38    9.80
  -3  -3  -3  202.98    9.00
   2   3   3  130.79    6.80
   2   3   3  114.39    6.60
   2   3   3  121.29    6.90
  -2  -3  -3  115.69    6.70
  -2  -3  -3  129.29    6.70
  -2  -3  -3  108.09    6.70
   1   3   3  228.98    9.30
   1   3   3  224.28    8.40
   1   3   3  226.98    9.00
  -1  -3  -3  224.48    9.10
  -1  -3  -3  228.98    9.10
  -1  -3  -3  228.58    8.50
   0   3   3    3.60    2.70
   0   3   3    5.20    2.40
   0   3   3    3.90    2.50
   0  -3  -3    4.80    2.00
   0  -3  -3    6.00    3.00
   0  -3  -3    4.80    2.00
   0  -3  -3    6.50    2.20
   0  -3  -3    7.20    2.70
  -1   3   3    8.10    2.80
  -1   3   3   13.50    2.70
  -1   3   3   14.00    2.40
   1  -3  -3   15.30    2.00
   1  -3  -3   16.50    2.10
   1  -3  -3   11.00    3.20
   1  -3  -3   13.70    2.20
   1  -3  -3   13.90    3.00
  -2   3   3  357.96   11.30
  -2   3   3  351.96    9.20
  -2   3   3  351.96    8.60
  -2   3   3  351.06   11.30
   2  -3  -3  333.97   11.20
   2  -3  -3  363.26   11.40
  -3   3   3   23.00    3.30
  -3   3   3   26.30    1.80
  -3   3   3   25.40    3.40
   3  -3  -3   24.90    3.30
   3  -3  -3   27.20    3.40
  -4   3   3  115.89    5.00
  -4   3   3  109.79    4.50
  -4   3   3  110.89    6.40
  -4   3   3  117.99    5.00
   4  -3  -3  103.09    5.00
   4  -3  -3   88.49    4.50
  -5   3   3   81.59    3.90
  -5   3   3   73.59    6.20
  -5   3   3   76.09    4.70
  -5   3   3   78.49    3.90
   5  -3  -3   78.49    4.10
   5  -3  -3   83.79    4.10
  -6   3   3  142.69    4.40
  -6   3   3  144.99    8.70
  -6   3   3  145.79    4.50
  -6   3   3  153.48    7.20
   6  -3  -3  148.19    4.90
   6  -3  -3  135.79    4.80
  -7   3   3   73.89    6.20
  -7   3   3   82.69    7.80
  -8   3   3   69.69    8.40
  -8   3   3   71.39    6.90
  -9   3   3   18.40    5.80
  -9   3   3    5.80    4.00
  -9   3   3    9.20    4.80
 -10   3   3   51.49    7.10
 -10   3   3   46.90    7.30
 -11   3   3   61.89    8.40
 -11   3   3   51.19    8.30
 -12   3   3  147.09   11.90
 -12   3   3  141.89   12.30
 -13   3   3   44.00    9.00
 -13  -3  -2   13.70    8.30
 -13  -3  -2    1.90    6.90
 -12  -3  -2    7.70    6.90
 -12  -3  -2   -3.80    5.90
  11   3   2   -3.50    4.90
 -11  -3  -2   11.00    6.90
 -11  -3  -2    4.00    6.50
  10   3   2    5.90    2.20
  10   3   2    6.20    5.70
  10   3   2    2.30    1.80
 -10  -3  -2    2.50    6.10
 -10  -3  -2   -4.40    4.60
   9   3   2  205.48    8.30
   9   3   2  203.28   14.80
   9   3   2  207.38    8.50
  -9  -3  -2  199.48   14.00
  -9  -3  -2  205.58    8.00
   8   3   2   61.39    5.30
   8   3   2   67.49    5.00
   8   3   2   48.20    8.40
  -8  -3  -2   62.99    8.70
  -8  -3  -2   71.19    9.70
  -8  -3  -2   62.79    5.00
   7   3   2   78.39    5.30
   7   3   2   76.89    5.70
   7   3   2   70.29    9.10
  -7  -3  -2   76.69    9.00
  -7  -3  -2   83.59    9.20
  -7  -3  -2   80.49    5.40
   6   3   2   48.80    4.80
   6   3   2   44.50    6.60
  -6  -3  -2   48.20    6.80
  -6  -3  -2   50.99    7.20
  -6  -3  -2   45.80    4.40
  -6  -3  -2   50.49    4.50
   5   3   2  302.77   13.10
   5   3   2  258.67    9.70
   5   3   2  267.47   10.00
  -5  -3  -2  252.17   12.20
  -5  -3  -2  272.57   12.30
  -5  -3  -2  269.57    9.80
  -5  -3  -2  267.57    9.70
   4   3   2   18.30    3.10
   4   3   2   21.10    3.10
   4   3   2   15.20    3.60
  -4  -3  -2   21.60    3.90
  -4  -3  -2   23.60    3.60
  -4  -3  -2   21.40    4.10
  -4  -3  -2   26.20    3.80
   3   3   2  560.84   17.70
   3   3   2  561.14   16.40
   3   3   2  582.94   16.40
  -3  -3  -2  556.74   16.20
  -3  -3  -2  553.14   16.20
  -3  -3  -2  543.95   17.30
  -3  -3  -2  563.34   17.50
   2   3   2   74.89    4.90
   2   3   2   83.89    6.00
   2   3   2   78.19    5.20
  -2  -3  -2   70.69    4.90
  -2  -3  -2   64.49    5.00
  -2  -3  -2   67.19    5.20
  -2  -3  -2   87.19    6.00
   1   3   2  415.76   12.40
   1   3   2  380.16   12.20
   1   3   2  415.36   12.20
  -1  -3  -2  401.36   12.40
  -1  -3  -2  426.76   12.20
  -1  -3  -2  443.16   12.70
   0   3   2   24.40    2.50
   0   3   2   24.20    3.30
   0   3   2   22.40    2.90
   0  -3  -2   20.90    3.20
   0  -3  -2   25.00    2.70
   0  -3  -2   23.80    2.40
   0  -3  -2   28.60    3.50
  -1   3   2  148.79    6.00
  -1   3   2  170.68    6.10
  -1   3   2  150.88    4.40
  -1   3   2  152.38    4.80
   1  -3  -2  144.19    5.90
   1  -3  -2  159.88    6.10
   1  -3  -2  149.88    4.40
   1  -3  -2  158.28    4.50
   1  -3  -2  158.18    4.60
  -2   3   2   19.10    2.50
  -2   3   2   24.80    3.10
  -2   3   2   20.60    1.80
   2  -3  -2   17.80    2.50
   2  -3  -2   18.50    2.70
  -3   3   2  395.26   10.80
  -3   3   2  386.36   10.80
   3  -3  -2  382.66   10.80
   3  -3  -2  393.46   10.90
  -4   3   2   29.10    4.40
  -4   3   2   23.20    2.10
  -4   3   2   21.90    2.10
   4  -3  -2   24.90    2.20
   4  -3  -2   21.30    2.30
  -5   3   2  469.75   16.10
  -6   3   2  513.75   18.10
  -6   3   2  500.35   16.00
  -7   3   2  562.14   18.30
  -7   3   2  542.45   20.10
  -8   3   2  286.47   12.90
  -8   3   2  259.07   12.90
  -8   3   2  283.67   14.60
  -9   3   2    5.70    4.10
  -9   3   2   -6.40    3.60
  -9   3   2   -2.50    4.40
 -10   3   2    2.80    3.90
 -10   3   2   -0.10    4.50
 -11   3   2   22.30    6.10
 -11   3   2   25.00    6.80
 -12   3   2  164.98   12.80
 -12   3   2  131.29   12.60
 -13   3   2  124.29   12.60
 -13   3   2   72.89   10.70
 -13  -3  -1   26.40    9.30
 -13  -3  -1   32.50    9.00
 -12  -3  -1  289.07   18.80
 -12  -3  -1  281.77   18.70
  11   3   1  161.28   14.80
 -11  -3  -1  145.29   13.80
 -11  -3  -1  162.38   14.10
  10   3   1   59.99    9.90
 -10  -3  -1   72.89   10.10
   9   3   1    2.40    1.90
   9   3   1   -0.40    1.60
   9   3   1    2.50    5.30
  -9  -3  -1    0.00    1.40
  -9  -3  -1    5.80    5.40
   8   3   1   13.60    2.60
   8   3   1   15.00    2.70
   8   3   1   11.00    5.90
  -8  -3  -1   20.50    6.20
  -8  -3  -1   16.40    2.50
  -8  -3  -1   14.10    5.70
   7   3   1   33.70    5.90
   7   3   1   42.40    4.00
   7   3   1   36.10    4.00
  -7  -3  -1   53.09    7.20
  -7  -3  -1   39.50    3.90
  -7  -3  -1   41.30    3.80
  -7  -3  -1   52.09    7.50
   6   3   1  352.06   15.40
   6   3   1  366.06   11.70
   6   3   1  373.66   11.50
  -6  -3  -1  361.76   15.60
  -6  -3  -1  386.86   15.50
  -6  -3  -1  386.26   11.50
  -6  -3  -1  362.06   11.40
   5   3   1  351.96   11.30
   5   3   1  348.97   14.40
  -5  -3  -1  368.96   11.20
  -5  -3  -1  366.06   14.50
  -5  -3  -1  366.36   11.10
  -5  -3  -1  337.07   13.80
   4   3   1  595.84   16.30
   4   3   1  548.65   18.50
  -4  -3  -1  583.34   16.20
  -4  -3  -1  563.64   18.10
  -4  -3  -1  588.34   18.60
  -4  -3  -1  592.44   16.10
   3   3   1  228.28    8.00
   3   3   1  230.18    7.80
  -3  -3  -1  226.18    7.90
  -3  -3  -1  229.78    7.80
  -3  -3  -1  226.78    9.50
  -3  -3  -1  230.78    9.40
   2   3   1  496.35   14.50
   2   3   1  488.55   13.40
   2   3   1  469.95   13.90
   2   3   1  469.25   13.40
  -2  -3  -1  471.85   13.30
  -2  -3  -1  475.95   13.30
  -2  -3  -1  481.45   14.30
  -2  -3  -1  459.55   14.00
   1   3   1  271.77    8.30
   1   3   1  286.57    8.40
   1   3   1  271.17    8.40
  -1  -3  -1  275.57    8.40
  -1  -3  -1  262.57    8.20
  -1  -3  -1  275.77    8.50
   0   3   1  359.46    9.50
   0   3   1  347.57   10.00
   0   3   1  363.86   10.10
   0  -3  -1  359.76   10.10
   0  -3  -1  367.76   10.10
   0  -3  -1  357.26    9.50
  -1   3   1    8.30    1.20
  -1   3   1    6.60    1.40
  -1   3   1   10.00    1.00
  -1   3   1    8.90    1.20
  -1   3   1    8.90    1.50
  -1   3   1    7.20    1.00
   1  -3  -1    6.80    1.50
   1  -3  -1    8.90    1.20
  -2   3   1  478.75   11.70
  -2   3   1  457.05   11.60
  -2   3   1  457.45   11.90
   2  -3  -1  390.36   11.50
   2  -3  -1  470.55   11.70
  -3   3   1  355.66   11.90
  -3   3   1  361.26    9.20
  -3   3   1  352.06    9.10
  -3   3   1  351.46   10.80
   3  -3  -1  355.46    9.20
   3  -3  -1  357.86    9.20
  -4   3   1    1.80    2.60
  -4   3   1    4.50    2.50
  -5   3   1  285.97   12.00
  -6   3   1  222.78   10.40
  -6   3   1  224.68   11.30
  -7   3   1  171.98   10.80
  -7   3   1  175.68   10.30
  -8   3   1  114.49    9.60
  -8   3   1  123.49    9.40
  -8   3   1  135.89   10.60
  -9   3   1   78.29    8.80
  -9   3   1   69.99    8.90
  -9   3   1   68.79    9.50
 -10   3   1  243.88   14.40
 -10   3   1  269.67   14.60
 -11   3   1   -0.70    5.10
 -11   3   1    6.00    5.30
 -12   3   1   -4.60    5.10
 -12   3   1   -1.90    5.50
 -13   3   1   27.40    7.70
 -13   3   1   15.50    6.70
 -13  -3   0   19.40    7.90
 -13  -3   0   -3.30    5.80
 -12  -3   0   47.40    9.20
 -12  -3   0   51.89    9.90
  11   3   0  132.89   13.50
 -11  -3   0  113.59   12.10
  10   3   0  112.59   12.30
 -10  -3   0  117.39   11.30
   9   3   0   13.80    5.80
  -9  -3   0   18.80    6.00
   8   3   0   50.39    3.30
   8   3   0   51.29    3.60
   8   3   0   65.99    8.60
  -8  -3   0   49.80    2.80
  -8  -3   0   52.99    7.90
  -8  -3   0   53.29    7.70
   7   3   0   53.79    3.60
   7   3   0   51.99    7.80
   7   3   0   58.29    4.00
  -7  -3   0   54.49    7.80
  -7  -3   0   61.29    7.90
  -7  -3   0   57.49    3.50
  -7  -3   0   52.09    3.50
   6   3   0   32.90    3.20
   6   3   0   36.10    3.40
   6   3   0   20.70    4.90
  -6  -3   0   26.40    5.10
  -6  -3   0   25.70    4.80
  -6  -3   0   30.80    3.00
  -6  -3   0   27.80    2.90
   5   3   0   18.00    2.50
   5   3   0   17.60    2.40
   5   3   0   15.00    3.80
  -5  -3   0   12.80    2.10
  -5  -3   0   14.40    4.00
  -5  -3   0   20.10    2.80
  -5  -3   0   15.70    4.10
   4   3   0  569.94   15.60
   4   3   0  548.65   18.10
  -4  -3   0  596.94   15.60
  -4  -3   0  585.14   15.60
  -4  -3   0  576.14   18.20
  -4  -3   0  605.04   18.00
   3   3   0 1321.97   33.60
   3   3   0 1327.97   34.30
   3   3   0 1312.77   32.50
  -3  -3   0 1317.97   32.40
  -3  -3   0 1352.16   34.20
  -3  -3   0 1313.77   33.70
  -3  -3   0 1364.86   32.50
   2   3   0    0.40    1.90
   2   3   0    3.70    1.70
   2   3   0    7.50    1.80
   2   3   0    3.20    2.30
  -2  -3   0    5.90    1.80
  -2  -3   0    2.70    1.70
  -2  -3   0    4.20    2.00
  -2  -3   0    9.50    2.60
   1   3   0   13.20    1.90
   1   3   0   15.40    2.10
  -1  -3   0   13.50    2.10
  -1  -3   0   11.60    1.80
  -1  -3   0   12.80    2.00
   0   3   0   -0.30    0.80
   0   3   0   -0.30    0.60
   0   3   0    0.00    0.60
   0   3   0   -0.60    0.70
   0  -3   0   -0.80    0.70
  -1   3   0   18.40    2.00
  -1   3   0   14.00    1.70
  -1   3   0   15.20    1.80
   1  -3   0   17.50    1.90
   1  -3   0   15.30    1.80
  -2   3   0    6.30    2.10
  -2   3   0    5.20    1.30
  -2   3   0    5.50    1.20
   2  -3   0    6.80    2.00
   2  -3   0    6.80    1.40
   2  -3   0    4.60    1.20
  -3   3   0 1364.16   34.30
  -3   3   0 1322.07   31.20
  -3   3   0 1303.77   31.10
  -3   3   0 1335.07   33.40
   3  -3   0 1313.17   31.20
   3  -3   0 1311.77   31.20
  -4   3   0  577.14   18.30
  -4   3   0  600.24   17.70
   4  -3   0  582.94   14.10
   4  -3   0  582.34   14.10
  -5   3   0   10.80    3.60
  -5   3   0   11.20    3.40
  -6   3   0   23.80    4.80
  -6   3   0   23.80    4.70
  -7   3   0   68.99    8.20
  -7   3   0   62.89    7.50
  -8   3   0   65.99    8.80
  -8   3   0   43.60    6.80
  -9   3   0   21.70    6.30
  -9   3   0   21.60    5.70
 -10   3   0  110.39   10.90
 -10   3   0  122.39   11.50
 -11   3   0  134.29   12.10
 -11   3   0  114.09   11.80
 -12   3   0   30.00    7.70
 -12   3   0   33.60    8.30
 -13   3   0    8.70    6.80
 -13   3   0    1.40    6.30
 -13  -3   1   22.70    8.20
 -13  -3   1   12.70    7.10
 -12  -3   1    4.00    5.80
 -11  -3   1    7.20    5.60
  10   3  -1  276.67   16.70
 -10  -3   1  252.07   15.00
   9   3  -1   77.19   10.60
  -9  -3   1   97.59    9.70
  -9  -3   1   94.79   10.50
   8   3  -1  126.09    4.50
   8   3  -1  137.79   11.00
  -8  -3   1  138.79   11.00
  -8  -3   1  126.69   10.10
   7   3  -1  174.58    6.30
   7   3  -1  175.68    6.20
   7   3  -1  179.28   11.30
  -7  -3   1  180.78   10.50
  -7  -3   1  181.78    5.90
  -7  -3   1  189.38   11.30
  -7  -3   1  184.18    5.80
   6   3  -1  187.08   10.70
   6   3  -1  212.68    7.10
   6   3  -1  199.58    7.00
  -6  -3   1  198.78    6.80
  -6  -3   1  211.88    6.80
  -6  -3   1  224.88   10.60
  -6  -3   1  218.38   11.10
   5   3  -1  266.67    8.50
   5   3  -1  274.17   11.80
   5   3  -1  266.17    8.50
  -5  -3   1  259.17   11.00
  -5  -3   1  263.27   11.40
  -5  -3   1  278.07    8.40
  -5  -3   1  280.97    8.40
   4   3  -1    5.80    1.80
   4   3  -1    3.90    2.30
   4   3  -1    7.30    2.80
   4   3  -1    3.80    1.50
  -4  -3   1    7.10    1.70
  -4  -3   1    5.20    1.60
  -4  -3   1    0.90    2.50
  -4  -3   1    2.90    2.60
   3   3  -1  361.96   11.50
   3   3  -1  360.96   10.50
   3   3  -1  384.76   12.10
  -3  -3   1  353.06   10.40
  -3  -3   1  364.76   11.60
  -3  -3   1  361.16   10.40
  -3  -3   1  361.36   11.90
   2   3  -1  435.26   12.60
   2   3  -1  452.25   12.40
   2   3  -1  468.35   13.00
   2   3  -1  461.15   12.50
  -2  -3   1  438.26   12.30
  -2  -3   1  453.45   12.70
  -2  -3   1  459.25   12.30
  -2  -3   1  434.26   12.70
   1   3  -1    8.50    1.70
   1   3  -1    6.60    1.60
   1   3  -1    7.40    1.50
   1   3  -1    7.90    1.10
  -1  -3   1    8.40    1.60
  -1  -3   1    6.90    1.50
  -1  -3   1    7.80    1.10
  -1  -3   1    4.60    1.60
  -1  -3   1    5.50    1.40
   0   3  -1  358.86    9.80
   0   3  -1  370.86   10.20
   0   3  -1  365.66   10.10
   0   3  -1  370.76   10.10
   0   3  -1  352.16    9.20
   0  -3   1  353.46   10.00
   0  -3   1  367.16    9.90
   0  -3   1  354.06   10.00
   0  -3   1  355.46   10.10
  -1   3  -1  258.07    8.20
  -1   3  -1  271.87    8.00
  -1   3  -1  268.77    8.00
  -1   3  -1  269.07    6.90
   1  -3   1  267.77    6.60
   1  -3   1  279.97    8.10
   1  -3   1  268.07    8.10
   1  -3   1  274.47    8.30
  -2   3  -1  496.65   12.90
  -2   3  -1  494.05   14.10
  -2   3  -1  466.75   12.80
   2  -3   1  464.15   13.80
   2  -3   1  470.15   12.80
  -3   3  -1  232.88    7.20
  -3   3  -1  237.68    7.20
  -3   3  -1  234.58    9.40
  -3   3  -1  217.68    9.30
   3  -3   1  219.58    7.20
  -4   3  -1  590.04   18.20
  -4   3  -1  583.94   15.20
  -4   3  -1  581.74   15.20
  -4   3  -1  582.64   18.70
   4  -3   1  591.74   15.30
   4  -3   1  576.94   15.30
  -5   3  -1  353.86    9.90
  -5   3  -1  361.06   13.90
  -5   3  -1  357.06    9.90
  -5   3  -1  362.66   14.40
   5  -3   1  361.46   10.10
   5  -3   1  355.46   10.00
  -6   3  -1  338.87   14.80
  -6   3  -1  360.36   14.90
  -6   3  -1  360.46    9.60
  -6   3  -1  369.76    9.70
   6  -3   1  363.66   10.00
   6  -3   1  372.56   10.00
  -7   3  -1   53.59    8.00
  -7   3  -1   40.00    6.40
  -8   3  -1   20.40    5.90
  -8   3  -1   21.60    6.00
  -9   3  -1   -1.80    4.60
  -9   3  -1    1.40    4.90
 -10   3  -1   70.99   10.10
 -10   3  -1   79.39   10.10
 -11   3  -1  159.98   13.50
 -11   3  -1  142.59   13.20
 -12   3  -1  258.97   17.30
 -12   3  -1  253.07   17.30
 -13   3  -1   21.90    8.60
 -13   3  -1   36.70    9.10
 -13  -3   2  112.79   12.60
 -13  -3   2  100.69   13.30
 -12  -3   2  141.69   12.90
 -11  -3   2   23.30    6.90
  10   3  -2   -0.50    4.30
 -10  -3   2   -1.00    4.50
   9   3  -2    1.20    5.10
  -9  -3   2   -1.10    4.10
  -9  -3   2    0.40    4.00
   8   3  -2  275.97    7.90
   8   3  -2  270.57   14.60
  -8  -3   2  272.97   13.40
  -8  -3   2  277.47   14.50
   7   3  -2  527.65   14.30
   7   3  -2  510.05   19.60
   7   3  -2  531.75   14.40
  -7  -3   2  522.15   13.90
  -7  -3   2  520.15   18.50
  -7  -3   2  525.85   19.60
  -7  -3   2  537.75   14.00
   6   3  -2  529.15   18.70
   6   3  -2  527.45   14.80
   6   3  -2  508.25   14.80
  -6  -3   2  541.55   14.60
  -6  -3   2  578.04   19.00
  -6  -3   2  562.34   17.90
  -6  -3   2  540.05   14.60
   5   3  -2  448.06   12.90
   5   3  -2  445.86   12.90
   5   3  -2  428.96   15.50
  -5  -3   2  453.45   15.50
  -5  -3   2  459.75   14.90
  -5  -3   2  452.85   12.80
  -5  -3   2  444.46   12.70
   4   3  -2   23.10    3.60
   4   3  -2   21.50    3.10
   4   3  -2   23.20    3.30
  -4  -3   2   24.30    2.90
  -4  -3   2   21.80    3.20
  -4  -3   2   23.90    3.50
  -4  -3   2   28.00    3.00
   3   3  -2  385.26   11.90
   3   3  -2  402.16   11.70
   3   3  -2  396.66   12.20
   3   3  -2  381.26   11.60
  -3  -3   2  396.56   12.00
  -3  -3   2  386.66   12.20
  -3  -3   2  418.26   11.80
  -3  -3   2  395.56   11.60
   2   3  -2   23.70    3.20
   2   3  -2   13.90    2.60
   2   3  -2   17.40    2.70
   2   3  -2   23.20    3.20
  -2  -3   2   21.50    2.10
  -2  -3   2   18.60    3.00
  -2  -3   2   21.10    2.80
  -2  -3   2   17.50    2.50
  -2  -3   2   18.20    2.70
   1   3  -2  147.49    4.90
   1   3  -2  142.99    6.10
   1   3  -2  142.39    6.00
   1   3  -2  153.18    6.00
   1   3  -2  152.78    5.50
  -1  -3   2  145.79    5.90
  -1  -3   2  146.69    5.00
  -1  -3   2  149.79    5.50
  -1  -3   2  150.78    6.00
  -1  -3   2  148.69    6.10
   0   3  -2   26.10    3.10
   0   3  -2   22.60    3.20
   0   3  -2   24.50    3.10
   0   3  -2   17.60    2.50
   0  -3   2   24.00    2.90
   0  -3   2   32.30    3.30
   0  -3   2   23.90    3.00
   0  -3   2   21.50    2.40
  -1   3  -2  361.36   11.40
  -1   3  -2  384.76   10.20
  -1   3  -2  398.96   11.60
  -1   3  -2  381.16   11.80
   1  -3   2  371.96   11.50
   1  -3   2  385.06   10.00
   1  -3   2  405.76   11.70
   1  -3   2  401.86   11.90
  -2   3  -2   73.29    4.50
  -2   3  -2   77.29    5.60
  -2   3  -2   78.59    5.70
  -2   3  -2   82.29    4.80
   2  -3   2   74.59    4.70
   2  -3   2   75.19    5.70
   2  -3   2   79.89    4.90
  -3   3  -2  564.24   17.70
  -3   3  -2  578.64   17.70
  -3   3  -2  561.44   15.90
  -3   3  -2  555.04   15.80
   3  -3   2  583.64   17.40
   3  -3   2  567.34   16.00
   3  -3   2  586.34   16.00
  -4   3  -2   24.90    3.10
  -4   3  -2   25.20    4.70
  -4   3  -2   18.90    4.00
  -4   3  -2   26.70    3.30
   4  -3   2   21.50    3.20
  -5   3  -2  254.77    8.60
  -5   3  -2  252.87   11.80
  -5   3  -2  252.67   11.90
  -5   3  -2  249.08    8.60
   5  -3   2  251.57    8.80
  -6   3  -2   51.49    3.90
  -6   3  -2   42.60    6.50
  -6   3  -2   43.70    6.50
  -6   3  -2   46.90    3.80
   6  -3   2   51.09    4.00
   6  -3   2   50.79    4.00
  -7   3  -2   66.09    8.50
  -7   3  -2   64.49    4.10
  -7   3  -2   77.49    4.30
  -7   3  -2   57.19    8.40
   7  -3   2   76.29    4.50
   7  -3   2   63.79    4.40
  -8   3  -2   52.69    8.50
  -8   3  -2   42.70    7.40
  -8   3  -2   52.09    3.30
  -8   3  -2   58.29    3.30
   8  -3   2   55.89    3.70
   8  -3   2   52.99    3.70
  -9   3  -2  204.78   14.10
 -10   3  -2    8.30    5.70
 -10   3  -2    2.90    5.60
 -11   3  -2    7.60    6.90
 -11   3  -2    5.60    6.00
 -12   3  -2    7.60    6.40
 -12   3  -2    2.90    6.20
 -13   3  -2   12.40    7.70
 -13   3  -2   -0.90    7.10
 -13  -3   3   36.10    8.30
 -12  -3   3  145.39   12.60
 -11  -3   3   55.29    8.30
 -10  -3   3   43.50    7.00
   9   3  -3   11.00    4.80
  -9  -3   3    3.30    4.40
  -9  -3   3   12.10    4.70
   8   3  -3   72.99    4.10
   8   3  -3   71.09    4.10
   8   3  -3   78.79    8.90
  -8  -3   3   79.99    8.00
  -8  -3   3   82.59    3.70
  -8  -3   3   75.89    3.60
  -8  -3   3   78.59    8.70
   7   3  -3   82.59    4.60
   7   3  -3   80.29    7.90
   7   3  -3   84.09    4.90
  -7  -3   3   69.99    7.70
  -7  -3   3   81.09    4.40
  -7  -3   3   79.19    4.40
  -7  -3   3   81.69    7.20
   6   3  -3  142.79    8.60
   6   3  -3  133.19    6.10
   6   3  -3  131.49    6.20
  -6  -3   3  136.19    5.90
  -6  -3   3  125.59    8.40
  -6  -3   3  138.29    7.80
  -6  -3   3  133.49    5.90
   5   3  -3   80.79    5.40
   5   3  -3   76.39    4.90
   5   3  -3   74.89    6.10
  -5  -3   3   85.09    5.80
  -5  -3   3   89.19    5.00
  -5  -3   3   77.79    4.70
  -5  -3   3   79.89    6.20
   4   3  -3   99.79    5.50
   4   3  -3  100.59    5.90
   4   3  -3   92.39    5.40
   4   3  -3   99.49    5.30
  -4  -3   3   87.59    5.10
  -4  -3   3  104.59    5.30
  -4  -3   3  111.49    6.10
  -4  -3   3   98.09    5.50
   3   3  -3   30.00    3.30
   3   3  -3   21.60    3.10
   3   3  -3   30.90    4.00
   3   3  -3   30.90    3.50
  -3  -3   3   35.00    3.60
  -3  -3   3   37.90    3.90
  -3  -3   3   32.30    4.00
  -3  -3   3   33.50    3.90
  -3  -3   3   26.90    2.20
  -3  -3   3   30.40    3.50
   2   3  -3  364.26   11.90
   2   3  -3  360.86   10.20
   2   3  -3  379.46   11.80
   2   3  -3  366.66    9.10
   2   3  -3  384.36   12.20
   2   3  -3  373.96   10.90
  -2  -3   3  375.26   12.00
  -2  -3   3  380.96   12.00
  -2  -3   3  379.86   10.90
  -2  -3   3  368.56   11.70
  -2  -3   3  375.36   10.20
   1   3  -3   10.50    2.90
   1   3  -3   11.60    3.20
   1   3  -3   10.70    2.20
   1   3  -3    9.40    2.10
   1   3  -3   14.00    2.90
  -1  -3   3   10.10    2.60
  -1  -3   3   12.00    3.20
  -1  -3   3   10.90    2.20
  -1  -3   3    8.80    2.70
   0   3  -3    5.40    2.90
   0   3  -3    4.00    2.20
   0   3  -3    9.20    2.90
   0   3  -3    5.50    2.90
   0  -3   3    8.40    2.30
   0  -3   3    5.50    2.70
   0  -3   3    4.20    2.80
   0  -3   3    4.90    2.80
  -1   3  -3  230.98    9.40
  -1   3  -3  243.28    8.30
  -1   3  -3  235.38    8.80
  -1   3  -3  236.68    7.90
  -1   3  -3  237.18    9.00
   1  -3   3  223.78    9.10
   1  -3   3  245.58    9.30
   1  -3   3  225.98    8.80
   1  -3   3  224.98    7.60
  -2   3  -3  114.39    5.00
  -2   3  -3  122.59    6.40
  -2   3  -3  113.59    6.50
  -2   3  -3  119.69    6.20
   2  -3   3  114.89    6.50
   2  -3   3  107.79    6.10
   2  -3   3  107.89    6.20
  -3   3  -3  213.58    9.90
  -3   3  -3  209.48    9.50
  -3   3  -3  215.18    8.50
  -3   3  -3  211.58    8.50
   3  -3   3  208.68    8.50
   3  -3   3  213.28    8.70
   3  -3   3  213.08    9.60
  -4   3  -3  503.35   17.50
  -4   3  -3  476.25   17.10
  -4   3  -3  506.75   15.20
  -4   3  -3  483.45   15.10
   4  -3   3  501.85   15.30
   4  -3   3  496.15   15.40
  -5   3  -3   17.40    3.10
  -5   3  -3   13.60    4.30
  -5   3  -3   20.90    3.30
  -5   3  -3   21.30    4.80
   5  -3   3   19.00    3.30
   5  -3   3   26.00    3.80
  -6   3  -3    2.40    3.40
  -6   3  -3    3.00    4.20
  -6   3  -3    2.10    2.20
   6  -3   3   -0.90    2.20
   6  -3   3    1.50    1.50
  -7   3  -3   74.19    8.80
  -7   3  -3   65.09    8.90
  -7   3  -3   79.49    5.40
   7  -3   3   73.59    5.50
  -8   3  -3    7.70    6.00
  -8   3  -3   12.70    3.00
   8  -3   3    6.80    2.70
   8  -3   3    9.50    2.80
  -9   3  -3   88.09   10.90
   9  -3   3  100.49    5.60
   9  -3   3  104.19    5.50
 -10   3  -3  230.08   15.50
 -10   3  -3  188.08   15.00
  10  -3   3  214.98    7.10
  10  -3   3  211.88    7.00
 -11   3  -3   99.89   12.40
 -11   3  -3   96.79   12.40
 -12   3  -3   65.79   11.00
 -12   3  -3   99.69   12.40
 -13   3  -3   -1.40    7.00
 -13   3  -3   10.10    7.70
 -12  -3   4   20.90    6.50
 -11  -3   4   98.29    9.90
 -10  -3   4   28.20    5.90
   9   3  -4   73.29    4.00
   9   3  -4   74.29    3.90
  -9  -3   4   64.59    7.80
  -9  -3   4   85.39    9.30
   8   3  -4  659.23   18.40
   8   3  -4  660.43   18.50
   8   3  -4  682.73   23.40
  -8  -3   4  659.63   23.10
  -8  -3   4  636.84   21.20
  -8  -3   4  658.93   18.00
   7   3  -4  104.29    8.60
   7   3  -4  112.09    6.20
   7   3  -4   98.39    5.80
  -7  -3   4  114.19    8.50
  -7  -3   4   98.19    5.70
  -7  -3   4  107.69    7.60
   6   3  -4   17.70    4.00
   6   3  -4   22.70    3.50
  -6  -3   4   19.00    3.60
  -6  -3   4   20.90    3.20
  -6  -3   4   18.70    3.80
  -6  -3   4   18.50    3.10
   5   3  -4   98.89    6.50
   5   3  -4  104.69    6.10
   5   3  -4   97.79    5.70
   5   3  -4  104.19    5.80
  -5  -3   4   99.19    5.80
  -5  -3   4   92.49    6.30
  -5  -3   4   94.39    5.80
  -5  -3   4   92.19    5.70
   4   3  -4  115.09    5.60
   4   3  -4  114.59    5.90
   4   3  -4  113.29    6.60
   4   3  -4  119.89    6.50
  -4  -3   4  123.19    6.40
  -4  -3   4  126.29    6.60
  -4  -3   4  109.19    5.80
  -4  -3   4  112.59    5.90
  -4  -3   4  103.79    6.20
  -4  -3   4  120.09    4.30
   3   3  -4  437.46   14.40
   3   3  -4  473.15   14.70
   3   3  -4  432.26   12.40
   3   3  -4  443.16   12.90
  -3  -3   4  468.05   12.20
  -3  -3   4  475.95   14.20
  -3  -3   4  452.95   14.50
  -3  -3   4  447.86   14.30
  -3  -3   4  436.16   12.80
   2   3  -4  422.16   12.00
   2   3  -4  408.96   13.60
   2   3  -4  406.66   10.90
   2   3  -4  424.56   13.90
   2   3  -4  405.76   13.00
   2   3  -4  402.56   10.40
  -2  -3   4  424.16   12.00
  -2  -3   4  395.86   13.30
  -2  -3   4  424.16   11.80
  -2  -3   4  401.56   13.60
  -2  -3   4  417.36   12.90
   1   3  -4  465.35   15.40
   1   3  -4  492.45   14.70
   1   3  -4  503.55   15.70
   1   3  -4  485.75   13.90
   1   3  -4  501.45   13.50
  -1  -3   4  497.35   13.70
  -1  -3   4  490.35   15.50
  -1  -3   4  479.05   14.50
  -1  -3   4  459.05   15.30
   0   3  -4    0.50    2.10
   0   3  -4    1.70    1.50
   0   3  -4    2.60    3.00
   0   3  -4   -1.10    2.30
   0   3  -4    2.10    2.50
   0  -3   4    1.80    2.10
   0  -3   4    1.70    2.60
   0  -3   4    2.60    2.60
   0  -3   4   -1.70    2.70
  -1   3  -4  143.99    6.30
  -1   3  -4  133.59    6.30
  -1   3  -4  153.68    7.70
  -1   3  -4  148.09    7.80
  -1   3  -4  126.99    7.10
   1  -3   4  133.69    7.20
   1  -3   4  142.39    7.10
   1  -3   4  138.19    7.70
  -2   3  -4   33.40    4.50
  -2   3  -4   28.80    4.30
  -2   3  -4   36.90    3.90
  -2   3  -4   35.90    5.10
  -2   3  -4   34.00    4.30
   2  -3   4   26.30    4.00
   2  -3   4   28.70    4.40
   2  -3   4   30.00    4.20
  -3   3  -4  608.24   16.40
  -3   3  -4  594.94   18.60
  -3   3  -4  619.64   18.70
  -3   3  -4  583.74   19.40
  -3   3  -4  612.74   19.10
   3  -3   4  598.04   18.80
   3  -3   4  607.14   18.70
   3  -3   4  618.44   19.50
  -4   3  -4  115.09    8.10
  -4   3  -4  118.29    8.30
  -4   3  -4  110.79    6.80
  -4   3  -4  106.39    6.70
   4  -3   4  121.99    7.00
   4  -3   4  114.19    7.20
  -5   3  -4  131.09    9.30
  -5   3  -4  140.69    9.60
  -5   3  -4  128.19    7.30
   5  -3   4  126.99    7.50
   5  -3   4  134.39    7.40
  -6   3  -4  119.49    9.90
  -6   3  -4  104.19   10.10
  -6   3  -4  128.89    7.30
   6  -3   4  114.09    7.20
   6  -3   4  112.49    7.30
  -7   3  -4    6.10    4.60
  -7   3  -4    7.70    3.10
  -7   3  -4   10.50    6.00
   7  -3   4    7.30    3.30
   7  -3   4    5.70    3.10
  -8   3  -4   28.30    4.30
  -8   3  -4   18.50    6.90
   8  -3   4   28.30    4.40
  -9   3  -4   92.59   11.30
   9  -3   4   66.29    5.60
   9  -3   4   65.29    5.90
 -10   3  -4   27.60    8.00
  10  -3   4   22.70    3.70
 -11   3  -4   56.99   10.30
 -11   3  -4   43.10    9.00
  11  -3   4   43.50    3.70
 -12   3  -4    7.10    7.50
 -12   3  -4   13.40    8.10
 -11  -3   5   -1.00    4.20
 -10  -3   5    2.40    4.70
 -10  -3   5   -2.80    3.50
   9   3  -5  365.36   11.70
   9   3  -5  342.97   11.60
  -9  -3   5  362.36   14.60
  -9  -3   5  348.77   16.30
   8   3  -5   60.69    5.30
   8   3  -5   86.19    5.90
  -8  -3   5   86.99    8.40
  -8  -3   5   76.09    5.40
  -8  -3   5   82.29    7.20
   7   3  -5  111.99    7.10
  -7  -3   5  113.79    8.50
  -7  -3   5  117.09    8.30
  -7  -3   5  124.59    7.50
  -7  -3   5  124.69    6.80
   6   3  -5   70.69    6.30
   6   3  -5   70.59    5.80
   6   3  -5   63.19    5.20
   6   3  -5   64.29    5.80
  -6  -3   5   64.49    6.10
  -6  -3   5   67.89    6.50
  -6  -3   5   59.99    5.40
  -6  -3   5   57.69    5.40
   5   3  -5    1.40    2.90
   5   3  -5    3.30    2.00
   5   3  -5   10.70    3.00
   5   3  -5    3.50    2.40
  -5  -3   5    4.40    2.20
  -5  -3   5   10.10    3.30
  -5  -3   5    4.70    2.40
  -5  -3   5    5.80    2.80
   4   3  -5  110.79    7.10
   4   3  -5  130.19    7.20
   4   3  -5  107.79    5.50
   4   3  -5  126.69    5.70
  -4  -3   5  117.49    5.70
  -4  -3   5  123.49    7.00
  -4  -3   5  118.39    7.00
  -4  -3   5  118.49    7.10
   3   3  -5   61.49    4.10
   3   3  -5   58.19    5.50
   3   3  -5   53.59    3.10
   3   3  -5   70.59    6.00
  -3  -3   5   58.99    5.10
  -3  -3   5   66.99    5.50
  -3  -3   5   50.09    4.00
  -3  -3   5   56.09    4.20
  -3  -3   5   66.39    5.90
   2   3  -5  265.77   11.10
   2   3  -5  275.57   10.30
   2   3  -5  271.97    8.70
   2   3  -5  271.07    9.20
   2   3  -5  255.77   10.80
  -2  -3   5  281.27    9.50
  -2  -3   5  289.77   10.20
  -2  -3   5  273.27   11.00
  -2  -3   5  294.97   11.50
   1   3  -5    8.20    3.00
   1   3  -5   13.70    2.80
   1   3  -5   11.00    1.40
   1   3  -5   10.40    3.30
   1   3  -5   12.70    2.60
   1   3  -5   16.00    3.50
  -1  -3   5   12.80    2.70
  -1  -3   5   10.40    3.50
  -1  -3   5   13.50    3.00
  -1  -3   5    9.20    3.60
   0   3  -5   73.19    5.80
   0   3  -5   73.29    4.00
   0   3  -5   80.09    6.70
   0   3  -5   77.09    5.30
   0  -3   5   81.89    6.10
   0  -3   5   80.99    5.80
   0  -3   5   83.09    6.70
   0  -3   5   70.29    5.10
  -1   3  -5  219.68    8.90
  -1   3  -5  240.28   10.20
  -1   3  -5  226.08    8.60
  -1   3  -5  209.98   10.10
   1  -3   5  241.78   10.00
   1  -3   5  256.17   10.70
   1  -3   5  257.17   11.00
  -2   3  -5  344.17   11.40
  -2   3  -5  319.77   13.20
  -2   3  -5  331.57   12.00
  -2   3  -5  344.07   13.20
  -2   3  -5  317.97   12.90
   2  -3   5  339.37   12.90
   2  -3   5  337.67   13.30
   2  -3   5  359.56   13.30
  -3   3  -5   24.20    4.40
  -3   3  -5   21.60    3.40
  -3   3  -5   32.50    5.60
  -3   3  -5   31.00    4.80
  -3   3  -5   26.40    4.50
   3  -3   5   26.50    4.50
   3  -3   5   24.90    4.40
   3  -3   5   20.70    4.10
  -4   3  -5  119.69    8.50
  -4   3  -5  119.39    7.70
  -4   3  -5   97.49    6.00
  -4   3  -5  109.69    8.60
   4  -3   5  117.09    7.60
   4  -3   5  110.59    7.60
  -5   3  -5   -3.10    2.80
  -5   3  -5    1.30    3.80
  -5   3  -5    3.90    3.50
   5  -3   5   -0.20    2.80
   5  -3   5    6.20    3.30
  -6   3  -5   78.69    8.90
  -6   3  -5   78.69    7.00
  -6   3  -5   76.29    9.10
   6  -3   5   92.49    7.20
   6  -3   5   89.99    7.30
  -7   3  -5   60.39    9.20
  -7   3  -5   65.29    6.50
  -7   3  -5   62.29    9.20
   7  -3   5   53.19    6.40
   7  -3   5   51.59    6.50
  -8   3  -5  272.67   12.00
  -8   3  -5  268.17   16.50
   8  -3   5  267.87   12.30
   8  -3   5  276.27   12.20
  -9   3  -5   33.70    8.30
   9  -3   5   27.70    4.90
 -10   3  -5   17.00    7.20
  10  -3   5   20.10    4.30
 -11   3  -5   -4.10    6.10
 -11   3  -5    3.40    6.80
  11  -3   5    3.80    3.00
 -12   3  -5   18.30    8.30
 -12   3  -5   23.80    8.60
  10   3  -6    4.60    2.30
 -10  -3   6    1.20    4.40
 -10  -3   6   -2.10    3.40
   9   3  -6   94.29    6.40
   9   3  -6   84.79    6.40
  -9  -3   6  112.69    7.90
  -9  -3   6  113.99    9.40
   8   3  -6    7.70    3.30
  -8  -3   6    4.60    3.80
  -8  -3   6    4.40    3.10
  -8  -3   6    6.40    3.40
   7   3  -6  149.79    8.60
   7   3  -6  154.98    8.50
  -7  -3   6  140.09    8.20
  -7  -3   6  146.49    7.60
  -7  -3   6  142.99    9.20
  -7  -3   6  130.49    8.70
   6   3  -6  123.19    8.20
   6   3  -6  132.39    7.90
   6   3  -6  120.89    6.50
  -6  -3   6  145.09    8.60
  -6  -3   6  121.19    7.30
  -6  -3   6  108.99    6.40
  -6  -3   6  136.29    8.00
   5   3  -6    4.60    3.10
   5   3  -6    8.80    3.60
   5   3  -6    5.10    2.20
  -5  -3   6   11.10    3.50
  -5  -3   6    8.00    2.50
  -5  -3   6    4.40    3.10
   4   3  -6   98.49    7.70
   4   3  -6  107.99    7.50
   4   3  -6  121.09    5.60
  -4  -3   6  112.39    5.60
  -4  -3   6  103.79    7.30
  -4  -3   6  119.79    7.00
   3   3  -6  289.37   12.30
   3   3  -6  292.37    9.60
   3   3  -6  294.67   12.50
   3   3  -6  282.57    7.70
   3   3  -6  269.27   10.80
  -3  -3   6  288.67   10.20
  -3  -3   6  302.57   12.40
  -3  -3   6  278.57   10.80
   2   3  -6  165.38    9.40
   2   3  -6  167.68    9.30
   2   3  -6  155.38    8.00
   2   3  -6  164.38    6.80
   2   3  -6  160.68    7.00
  -2  -3   6  167.28    7.60
  -2  -3   6  148.19    9.10
  -2  -3   6  169.08    8.00
   1   3  -6    7.00    3.40
   1   3  -6    2.30    3.20
   1   3  -6    0.30    2.40
   1   3  -6    5.30    2.90
  -1  -3   6    2.70    2.60
  -1  -3   6    1.80    2.40
  -1  -3   6    2.90    3.30
  -1  -3   6    3.10    2.80
   0   3  -6  339.67   13.00
   0   3  -6  345.17   10.40
   0   3  -6  351.26   12.10
   0   3  -6  340.17   13.90
   0   3  -6  346.67   13.80
   0  -3   6  360.16   12.00
   0  -3   6  347.87   13.70
   0  -3   6  375.96   13.10
   0  -3   6  333.67   13.90
  -1   3  -6   16.50    4.10
  -1   3  -6   10.90    3.70
  -1   3  -6   22.90    3.90
  -1   3  -6   20.50    4.30
  -1   3  -6   19.70    3.00
   1  -3   6   14.30    3.70
   1  -3   6   19.80    4.60
   1  -3   6   20.80    3.50
   1  -3   6   25.00    4.60
  -2   3  -6  204.58    9.00
  -2   3  -6  197.58   10.60
  -2   3  -6  204.98    9.20
  -2   3  -6  177.48   10.00
   2  -3   6  217.38   10.50
   2  -3   6  182.08   10.10
   2  -3   6  192.98   10.10
  -3   3  -6  349.57   14.80
  -3   3  -6  359.66   12.70
  -3   3  -6  368.86   14.20
  -3   3  -6  355.26   15.40
   3  -3   6  365.56   15.00
   3  -3   6  374.76   15.20
   3  -3   6  382.86   14.80
  -4   3  -6   33.30    5.40
  -4   3  -6   26.90    5.20
  -4   3  -6   31.80    5.80
  -4   3  -6   32.50    4.40
   4  -3   6   25.40    4.80
   4  -3   6   27.80    5.00
  -5   3  -6   29.80    4.40
  -5   3  -6   20.70    5.40
  -5   3  -6   41.60    6.90
  -5   3  -6   32.50    5.30
   5  -3   6   27.30    5.30
   5  -3   6   20.80    4.80
  -6   3  -6   33.40    5.50
  -6   3  -6   39.30    8.00
  -6   3  -6   32.80    6.70
  -6   3  -6   29.30    4.60
   6  -3   6   32.00    5.70
   6  -3   6   37.20    5.90
  -7   3  -6   -2.00    4.90
  -7   3  -6    1.40    3.70
   7  -3   6   -5.10    3.10
   7  -3   6   -2.30    3.10
  -8   3  -6  407.36   16.60
  -8   3  -6  430.36   20.80
   8  -3   6  442.96   17.30
   8  -3   6  420.36   16.90
  -9   3  -6   89.19   12.50
   9  -3   6   89.09    8.30
 -10   3  -6   40.10    8.90
  10  -3   6   46.70    6.80
 -11   3  -6   22.60    8.30
 -11   3  -6   21.70    8.80
  11  -3   6   20.60    4.70
 -12   3  -6   -1.60    7.00
 -12   3  -6   17.60    8.40
  12  -3   6    3.40    3.20
  11   3  -7  113.89    5.30
  10   3  -7   64.09    5.90
   9   3  -7  234.98   10.90
  -9  -3   7  255.37   10.70
  -9  -3   7  228.78   12.50
   8   3  -7   49.80    6.30
   8   3  -7   50.69    6.00
  -8  -3   7   74.49    6.60
  -8  -3   7   49.30    5.30
  -8  -3   7   49.80    6.60
   7   3  -7   72.59    7.40
   7   3  -7   77.89    6.90
  -7  -3   7   66.09    5.50
  -7  -3   7   66.69    6.90
  -7  -3   7   65.69    7.50
   6   3  -7  100.39    7.90
   6   3  -7   96.69    5.60
   6   3  -7   83.49    7.90
  -6  -3   7   99.59    7.60
  -6  -3   7   79.19    7.40
  -6  -3   7   91.59    5.70
   5   3  -7  123.69    9.00
   5   3  -7  126.99    6.20
   5   3  -7  143.99    9.50
  -5  -3   7  145.59    8.20
  -5  -3   7  125.79    8.80
   4   3  -7  498.85   18.30
   4   3  -7  482.45   14.40
   4   3  -7  512.05   18.20
  -4  -3   7  507.55   16.60
  -4  -3   7  480.55   17.90
   3   3  -7  132.89    9.00
   3   3  -7  114.99    5.90
   3   3  -7  117.39    8.50
   3   3  -7  104.39    7.00
   3   3  -7  112.09    5.00
  -3  -3   7  125.39    7.30
  -3  -3   7  135.09    8.90
   2   3  -7  407.96   16.80
   2   3  -7  444.76   13.60
   2   3  -7  447.36   13.90
   2   3  -7  440.16   15.30
   2   3  -7  452.35   16.80
  -2  -3   7  455.95   17.30
  -2  -3   7  431.86   15.00
  -2  -3   7  457.35   14.70
   1   3  -7   21.10    4.20
   1   3  -7   16.70    4.60
   1   3  -7   18.90    4.90
   1   3  -7   27.80    4.00
  -1  -3   7   13.80    3.60
  -1  -3   7   14.10    3.40
  -1  -3   7   13.80    4.60
   0   3  -7  141.99    9.80
   0   3  -7  154.68    9.90
   0   3  -7  137.99    8.40
   0   3  -7  143.69    6.00
   0   3  -7  144.19    7.90
   0  -3   7  143.49    8.40
   0  -3   7  130.69    7.70
   0  -3   7  143.79    9.70
  -1   3  -7  368.76   12.40
  -1   3  -7  359.86   15.40
  -1   3  -7  367.26   14.70
  -1   3  -7  382.46   13.50
   1  -3   7  378.66   13.20
   1  -3   7  368.66   15.70
   1  -3   7  341.07   14.10
   1  -3   7  397.56   15.80
  -2   3  -7  130.59    9.60
  -2   3  -7  106.99    8.50
  -2   3  -7  118.29    7.40
  -2   3  -7  128.39    8.00
   2  -3   7  130.59    9.40
   2  -3   7  114.39    8.60
   2  -3   7  122.29    8.70
  -3   3  -7   33.90    5.10
  -3   3  -7   23.10    4.30
  -3   3  -7   25.00    5.40
  -3   3  -7   25.00    5.10
   3  -3   7   31.50    5.80
   3  -3   7   36.80    5.60
  -4   3  -7   25.20    6.70
  -4   3  -7   24.40    4.40
  -4   3  -7   12.50    4.80
  -4   3  -7   22.10    4.80
   4  -3   7   16.10    4.70
   4  -3   7   19.10    5.20
  -5   3  -7   -1.80    3.20
  -5   3  -7    5.90    4.30
  -5   3  -7   -0.30    4.00
  -5   3  -7    6.30    5.90
   5  -3   7    6.40    4.30
   5  -3   7    1.60    3.70
  -6   3  -7    8.50    4.90
  -6   3  -7    1.90    3.40
  -6   3  -7   -0.60    5.00
  -6   3  -7   -1.20    3.90
   6  -3   7    4.60    4.50
   6  -3   7    4.00    4.00
  -7   3  -7   51.29    6.60
  -7   3  -7   54.49    8.90
  -7   3  -7   52.49    7.20
   7  -3   7   59.49    7.70
   7  -3   7   51.99    7.40
  -8   3  -7  103.59   11.60
  -8   3  -7   95.59    8.90
   8  -3   7  103.39    9.30
  -9   3  -7    8.60    6.50
   9  -3   7    6.80    4.60
 -10   3  -7   33.80    9.50
  10  -3   7   26.20    5.70
 -11   3  -7   21.70    8.90
 -11   3  -7   37.40    9.80
  11  -3   7   23.00    5.50
  11   3  -8   -0.10    2.70
  10   3  -8  102.49    7.80
   9   3  -8  295.07   13.20
   8   3  -8   48.20    6.60
  -8  -3   8   46.60    4.60
   7   3  -8   23.70    4.90
   7   3  -8   15.90    4.80
  -7  -3   8   16.20    4.70
  -7  -3   8   10.80    4.10
   6   3  -8   12.20    4.60
   6   3  -8    6.50    2.50
   6   3  -8   12.50    4.30
  -6  -3   8    5.70    4.00
  -6  -3   8   16.30    4.40
   5   3  -8   21.40    3.00
   5   3  -8   26.10    5.50
   5   3  -8   19.90    5.10
  -5  -3   8   16.10    4.10
  -5  -3   8   15.50    4.80
   4   3  -8   61.19    7.30
   4   3  -8   77.69    8.00
   4   3  -8   58.59    4.60
  -4  -3   8   60.09    6.60
  -4  -3   8   68.39    7.80
   3   3  -8  341.57   10.90
   3   3  -8  340.77   13.50
   3   3  -8  344.97   11.90
   3   3  -8  379.56   15.70
   3   3  -8  385.76   16.80
  -3  -3   8  344.97   15.30
  -3  -3   8  353.86   13.50
   2   3  -8    0.00    3.10
   2   3  -8    0.40    2.50
   2   3  -8    7.30    4.10
   2   3  -8    5.00    4.10
   2   3  -8    2.90    2.30
  -2  -3   8    2.30    3.00
  -2  -3   8    4.00    3.10
  -2  -3   8   -3.70    3.50
   1   3  -8   49.50    7.20
   1   3  -8   58.29    6.90
   1   3  -8   68.69    6.20
  -1  -3   8   66.39    8.10
  -1  -3   8   60.89    6.30
  -1  -3   8   67.89    6.70
   0   3  -8   37.20    3.80
   0   3  -8   32.30    5.40
   0   3  -8   40.50    5.90
   0   3  -8   32.30    5.90
   0  -3   8   43.10    5.80
   0  -3   8   38.20    5.20
   0  -3   8   25.30    5.40
  -1   3  -8  691.53   21.50
  -1   3  -8  722.73   23.50
  -1   3  -8  700.93   24.60
  -1   3  -8  690.83   20.20
   1  -3   8  678.73   21.00
   1  -3   8  709.13   23.10
   1  -3   8  684.83   24.70
  -2   3  -8   59.09    7.40
  -2   3  -8   57.39    6.20
  -2   3  -8   67.99    7.20
  -2   3  -8   61.19    8.50
   2  -3   8   76.89    8.70
  -3   3  -8  183.18   10.20
  -3   3  -8  178.38   12.20
  -3   3  -8  186.98   11.70
  -3   3  -8  213.08   10.90
   3  -3   8  181.08   11.90
  -4   3  -8   36.00    5.60
  -4   3  -8   24.60    6.20
  -4   3  -8   21.10    5.30
  -4   3  -8   34.50    6.80
   4  -3   8   27.70    6.30
   4  -3   8   36.60    7.00
  -5   3  -8  143.19    9.60
  -5   3  -8  147.29   11.40
  -5   3  -8  135.99   10.90
  -5   3  -8  157.48   12.30
   5  -3   8  153.88   11.30
   5  -3   8  150.18   11.30
  -6   3  -8   91.89    9.70
  -6   3  -8  103.59   12.20
  -6   3  -8   85.89    8.00
  -6   3  -8   87.79   10.10
   6  -3   8   77.49    9.20
   6  -3   8   99.19    9.40
  -7   3  -8  285.47   17.30
  -7   3  -8  296.57   15.20
   7  -3   8  286.17   15.20
  -8   3  -8  111.59   12.50
   8  -3   8  127.29   10.60
  -9   3  -8   79.19   12.00
   9  -3   8   64.79    8.80
 -10   3  -8   47.90   10.10
  10  -3   8   51.89    7.70
 -11   3  -8   32.80   10.30
 -11   3  -8   30.90    9.50
  11  -3   8   26.40    6.20
  11   3  -9   39.00    5.40
  10   3  -9   99.89    8.60
   9   3  -9    2.10    4.30
   8   3  -9   49.00    7.20
   7   3  -9  146.69   10.80
  -7  -3   9  169.58   11.00
   6   3  -9   58.49    7.50
   6   3  -9   58.59    4.30
   6   3  -9   63.89    8.50
  -6  -3   9   54.79    7.80
  -6  -3   9   46.60    6.40
   5   3  -9  187.78   12.20
   5   3  -9  187.48   11.80
   5   3  -9  193.28    7.70
  -5  -3   9  180.38   10.10
  -5  -3   9  209.78   12.60
   4   3  -9  152.28   11.50
   4   3  -9  152.68    9.20
   4   3  -9  157.98   11.10
   4   3  -9  163.08    7.30
  -4  -3   9  153.28   11.20
  -4  -3   9  172.48    9.40
   3   3  -9   -3.90    3.90
   3   3  -9    0.50    3.40
   3   3  -9   -4.50    2.10
   3   3  -9   -0.60    2.40
  -3  -3   9    2.10    3.40
  -3  -3   9   -5.20    4.00
   2   3  -9  126.89   10.20
   2   3  -9  126.69    7.60
   2   3  -9  121.99    8.90
   2   3  -9  136.29    7.60
  -2  -3   9  144.59   10.60
  -2  -3   9  139.59    8.60
  -2  -3   9  143.79    9.00
   1   3  -9  220.88   13.20
   1   3  -9  229.98   10.80
   1   3  -9  216.08   11.80
  -1  -3   9  235.48   11.30
  -1  -3   9  239.28   11.60
  -1  -3   9  210.28   13.30
   0   3  -9  143.09   11.00
   0   3  -9  156.48   10.20
   0   3  -9  160.58    9.50
   0  -3   9  162.18    9.50
   0  -3   9  132.59   10.60
  -1   3  -9  246.48   13.20
  -1   3  -9  239.28   14.40
  -1   3  -9  261.87   12.10
  -1   3  -9  243.58   10.10
   1  -3   9  226.68   11.40
   1  -3   9  254.77   14.10
  -2   3  -9  176.18   12.20
  -2   3  -9  167.88   12.00
  -2   3  -9  201.18   11.00
  -2   3  -9  179.38    9.50
   2  -3   9  175.38   12.10
  -3   3  -9   10.60    6.10
  -3   3  -9    9.60    5.70
  -3   3  -9   18.90    5.10
  -3   3  -9   15.10    4.40
   3  -3   9   13.80    5.10
  -4   3  -9   24.40    5.60
  -4   3  -9   25.60    6.70
  -4   3  -9   28.20    7.60
  -4   3  -9   24.50    5.20
   4  -3   9   32.60    6.50
  -5   3  -9  107.69   10.10
  -5   3  -9  105.79    9.10
  -5   3  -9   91.59   10.10
  -5   3  -9  101.89   11.90
   5  -3   9   90.39   10.10
  -6   3  -9    1.70    6.00
  -6   3  -9    7.30    4.80
   6  -3   9   -2.10    4.50
  -7   3  -9  206.98   13.40
  -7   3  -9  191.28   15.70
   7  -3   9  229.68   14.40
  -8   3  -9  223.08   17.40
   8  -3   9  233.88   14.60
  -9   3  -9   27.20    8.90
   9  -3   9   49.40    8.10
 -10   3  -9   21.00    9.10
  10  -3   9    9.10    5.50
  11   3 -10   68.69    8.10
  10   3 -10   35.80    6.50
   9   3 -10    0.20    4.10
   8   3 -10    3.60    4.80
   7   3 -10   80.69    9.40
  -7  -3  10   78.39    9.20
   6   3 -10   47.40    7.80
  -6  -3  10   64.09    8.40
   5   3 -10  200.38    7.80
   5   3 -10  225.48   14.90
   5   3 -10  187.08   12.80
  -5  -3  10  184.88   12.50
  -5  -3  10  201.58   10.70
   4   3 -10  101.59   10.70
   4   3 -10   87.89    5.80
   4   3 -10   91.69    7.70
  -4  -3  10   75.29    8.70
  -4  -3  10  100.49    8.00
   3   3 -10    4.80    2.70
   3   3 -10    3.60    2.70
   3   3 -10    0.00    3.60
   3   3 -10    0.40    4.90
  -3  -3  10   -3.70    4.10
  -3  -3  10    6.80    3.80
   2   3 -10    1.70    3.90
   2   3 -10    5.20    4.70
   2   3 -10   -1.00    3.30
   2   3 -10    0.10    2.60
  -2  -3  10   -3.00    4.40
  -2  -3  10    3.80    3.90
  -2  -3  10    0.00    3.50
   1   3 -10   74.79    8.10
   1   3 -10   85.29    7.80
   1   3 -10   73.59    9.90
  -1  -3  10   68.19    8.00
  -1  -3  10   95.29   10.30
   0   3 -10   81.49    8.30
   0   3 -10   83.69    8.80
   0   3 -10   91.39   10.10
   0  -3  10   71.59    9.90
   0  -3  10   86.09    8.40
  -1   3 -10  334.47   17.30
  -1   3 -10  320.17   15.90
  -1   3 -10  354.46   14.90
  -1   3 -10  348.47   12.50
   1  -3  10  312.37   16.90
   1  -3  10  322.47   14.10
  -2   3 -10   63.29    9.30
  -2   3 -10   46.10    7.90
  -2   3 -10   57.99    8.30
  -2   3 -10   49.70    6.50
   2  -3  10   60.99    8.80
  -3   3 -10   49.70    6.40
  -3   3 -10   48.50    8.20
  -3   3 -10   42.00    6.80
  -3   3 -10   26.90    6.80
   3  -3  10   27.40    6.50
  -4   3 -10   12.00    6.10
  -4   3 -10   -4.60    5.20
  -4   3 -10   -4.50    3.90
  -4   3 -10    8.20    4.60
   4  -3  10    7.80    4.90
  -5   3 -10    2.00    4.80
  -5   3 -10    4.30    4.50
  -5   3 -10    4.10    5.90
  -5   3 -10   -1.10    3.80
   5  -3  10   -5.40    3.70
  -6   3 -10   14.40    5.90
  -6   3 -10   20.10    7.00
   6  -3  10   10.90    5.90
  -7   3 -10   21.60    8.40
  -7   3 -10   28.60    7.00
   7  -3  10   24.50    7.10
  -8   3 -10   -3.30    6.40
   8  -3  10    5.10    5.10
  -9   3 -10    0.50    6.50
   9  -3  10    6.00    5.30
 -10   3 -10  233.98   18.90
  10  -3  10  170.18   14.10
  10   3 -11  130.39   11.00
   9   3 -11   14.90    5.50
   8   3 -11   11.70    5.50
   7   3 -11   26.80    6.90
   6   3 -11  107.49   11.20
  -6  -3  11   88.89    9.90
   5   3 -11    8.00    5.30
  -5  -3  11    7.40    4.80
   4   3 -11   96.39    8.30
   4   3 -11  127.99   11.70
  -4  -3  11  100.99   10.70
   3   3 -11  136.29    7.50
   3   3 -11  101.79    9.00
   3   3 -11  136.69   12.20
   3   3 -11  141.69    7.90
  -3  -3  11  117.19   11.50
   2   3 -11   32.60    5.10
   2   3 -11   30.60    5.80
   2   3 -11   29.30    4.80
   2   3 -11   29.70    6.90
  -2  -3  11   16.40    6.10
   1   3 -11   42.30    6.00
   1   3 -11   47.20    8.40
   1   3 -11   42.50    6.80
  -1  -3  11   52.49    9.10
  -1  -3  11   39.80    6.20
   0   3 -11  287.37   14.90
   0   3 -11  282.87   17.20
   0   3 -11  335.57   14.50
   0  -3  11  279.57   17.10
   0  -3  11  278.87   13.90
  -1   3 -11   48.10    9.10
  -1   3 -11   62.09    9.10
  -1   3 -11   62.59    8.30
   1  -3  11   38.60    7.90
   1  -3  11   58.49    7.80
  -2   3 -11  131.49   11.60
  -2   3 -11  124.89   10.40
  -2   3 -11  113.69   11.50
  -2   3 -11  133.49    8.70
   2  -3  11  108.09   11.20
  -3   3 -11  281.47   16.60
  -3   3 -11  351.06   15.70
  -3   3 -11  303.27   14.20
  -3   3 -11  304.97   17.90
   3  -3  11  299.27   17.80
  -4   3 -11   61.69    8.80
  -4   3 -11   50.99    8.70
  -4   3 -11   47.60    7.20
  -4   3 -11   61.99    9.60
   4  -3  11   47.60    8.70
  -5   3 -11  138.69   13.10
  -5   3 -11  149.09   13.30
   5  -3  11  160.78   13.00
  -6   3 -11  383.16   20.00
  -6   3 -11  345.07   20.60
   6  -3  11  354.36   19.80
  -7   3 -11    3.40    5.40
  -7   3 -11   -7.00    6.10
   7  -3  11    1.40    5.20
  -8   3 -11   24.30    8.80
   8  -3  11   35.40    8.30
  -9   3 -11   24.30    9.20
   9  -3  11   22.80    7.50
   9   3 -12   57.69    9.00
   8   3 -12   66.29    9.90
   7   3 -12   19.60    6.80
   6   3 -12  169.08   13.60
  -6  -3  12  186.28   13.60
   5   3 -12   41.40    8.40
  -5  -3  12   26.90    7.20
   4   3 -12   54.49    7.00
   4   3 -12   42.40    8.70
  -4  -3  12   69.19    9.50
   3   3 -12   15.70    3.90
   3   3 -12   10.90    4.50
   3   3 -12   23.40    7.00
  -3  -3  12    6.70    5.70
   2   3 -12  291.67   12.90
   2   3 -12  316.47   15.00
   2   3 -12  302.87   17.60
  -2  -3  12  322.67   18.20
   1   3 -12    0.50    4.80
   1   3 -12   -1.30    4.10
   1   3 -12   14.80    4.50
  -1  -3  12   -1.40    4.70
   0   3 -12   55.09    9.10
   0   3 -12   67.29    8.20
   0   3 -12   46.90    7.60
   0  -3  12   48.80    9.00
  -1   3 -12    3.30    4.40
  -1   3 -12    7.60    5.40
  -1   3 -12   15.10    6.80
   1  -3  12    6.20    5.50
  -2   3 -12    5.30    4.50
  -2   3 -12   -3.60    4.70
  -2   3 -12    0.50    5.30
   2  -3  12    2.00    5.70
  -3   3 -12   21.10    6.00
  -3   3 -12   11.90    4.30
  -3   3 -12    3.20    6.00
  -3   3 -12   14.70    6.20
   3  -3  12    3.90    6.00
  -4   3 -12  232.48   16.60
  -4   3 -12  239.08   16.60
  -4   3 -12  245.88   14.70
  -4   3 -12  235.98   13.90
   4  -3  12  251.67   17.10
  -5   3 -12   31.50    8.40
  -5   3 -12   49.30    9.60
   5  -3  12   36.80    8.50
  -6   3 -12   97.09   13.50
  -6   3 -12  107.99   12.50
   6  -3  12   70.19   10.80
  -7   3 -12    9.40    8.50
   7  -3  12    7.70    6.30
  -8   3 -12    4.10    7.40
   8  -3  12   -5.60    5.10
   9   3 -13    8.50    6.20
   8   3 -13    7.50    6.10
   7   3 -13   17.90    7.10
   6   3 -13   54.99    9.70
   5   3 -13   92.49   12.00
  -5  -3  13   76.89   11.00
   4   3 -13    4.80    4.20
   4   3 -13    9.70    6.20
  -4  -3  13    3.50    5.80
   3   3 -13    2.30    6.00
   3   3 -13    2.30    3.00
   3   3 -13    9.40    4.50
  -3  -3  13   -5.30    5.40
   2   3 -13   21.80    5.00
   2   3 -13   11.90    5.20
   2   3 -13   17.20    7.00
  -2  -3  13   26.50    8.00
   1   3 -13   90.59   11.60
   1   3 -13   88.79    9.00
   1   3 -13   83.99    9.60
  -1  -3  13   96.19   12.50
   0   3 -13  171.18   14.60
   0   3 -13  190.28   13.20
   0   3 -13  199.98   12.20
   0  -3  13  159.58   14.20
  -1   3 -13    5.10    5.40
  -1   3 -13   -1.80    5.30
  -1   3 -13   -5.00    4.20
   1  -3  13   -1.00    5.60
  -2   3 -13    2.30    4.90
  -2   3 -13    3.60    5.30
  -2   3 -13   10.10    6.90
   2  -3  13    5.40    5.90
  -3   3 -13   56.49    9.40
  -3   3 -13   85.09   11.50
  -3   3 -13   63.39    8.50
   3  -3  13   46.10    9.50
  -4   3 -13   22.30    8.00
  -4   3 -13   29.80    8.80
   4  -3  13   19.80    7.50
  -5   3 -13    2.70    6.80
  -5   3 -13   -6.50    5.60
   5  -3  13   -1.30    6.00
  -6   3 -13  120.99   14.40
  -6   3 -13  143.59   14.80
   6  -3  13  119.39   13.80
  -7   3 -13  136.89   16.00
   7  -3  13  152.88   15.30
   7   3 -14   17.70    7.40
   6   3 -14   -3.30    5.70
   5   3 -14  143.79   14.40
  -5  -3  14  119.49   13.50
   4   3 -14  156.58   15.10
   4   3 -14  197.88   11.90
  -4  -3  14  169.78   15.30
   3   3 -14   55.09    8.20
   3   3 -14   48.20   10.30
   3   3 -14   46.80    5.70
  -3  -3  14   36.00    9.10
   2   3 -14  127.09    9.30
   2   3 -14  115.49   10.80
   2   3 -14  126.99   13.40
  -2  -3  14  129.99   14.20
   1   3 -14  120.89   14.40
   1   3 -14  132.89   10.60
   1   3 -14  158.58   12.30
  -1  -3  14  122.69   13.40
   0   3 -14   29.60    6.50
   0   3 -14   24.60    7.00
   0   3 -14   32.30    9.20
   0  -3  14   40.80    9.90
  -1   3 -14  113.09   11.50
  -1   3 -14   97.19   13.70
  -1   3 -14  101.09   10.80
   1  -3  14  123.79   14.60
  -2   3 -14  120.89   11.50
  -2   3 -14  156.48   15.70
  -2   3 -14  141.69   13.40
   2  -3  14  107.79   13.00
  -3   3 -14   62.89   10.80
  -3   3 -14   53.79    8.60
  -3   3 -14   50.09    9.30
   3  -3  14   55.69   10.80
  -4   3 -14    6.00    6.20
  -4   3 -14   29.50    8.30
   4  -3  14   20.00    8.30
  -5   3 -14  160.78   16.60
  -5   3 -14  168.48   15.60
   5  -3  14  193.98   16.80
  -6   3 -14    0.90    6.80
   6  -3  14    6.60    6.70
   6   3 -15   -0.40    6.60
   5   3 -15   26.40    9.30
   4   3 -15   17.70    8.10
  -4  -3  15    7.90    7.60
   3   3 -15  128.39   15.00
   3   3 -15   86.69    9.70
   3   3 -15   90.99    7.10
  -3  -3  15  101.49   13.80
   2   3 -15   22.20    8.90
   2   3 -15   40.30    6.30
   2   3 -15   14.20    6.10
  -2  -3  15   10.40    7.20
   1   3 -15  169.58   11.80
   1   3 -15  149.49   15.20
   1   3 -15  148.29   12.80
  -1  -3  15  144.39   15.80
   0   3 -15   25.10    7.40
   0   3 -15   21.80    6.30
   0   3 -15   25.80    9.50
   0  -3  15   22.30    9.20
  -1   3 -15   14.90    8.70
  -1   3 -15   13.60    6.80
  -1   3 -15   15.00    6.10
   1  -3  15   24.00    8.60
  -2   3 -15   10.40    6.60
  -2   3 -15    5.00    7.60
  -2   3 -15   15.60    6.50
   2  -3  15   27.70    9.20
  -3   3 -15   65.59   11.10
  -3   3 -15   92.39   14.30
  -3   3 -15   61.39    9.50
   3  -3  15   75.29   12.50
  -4   3 -15    9.70    7.80
  -4   3 -15   -4.10    6.50
   4  -3  15   -9.70    5.90
  -5   3 -15    7.90    7.50
   4   3 -16    2.80    6.80
  -4  -3  16    2.90    7.20
   3   3 -16    0.70    6.40
   3   3 -16    4.90    3.30
  -3  -3  16    2.80    6.60
   2   3 -16   21.80    8.60
   2   3 -16    7.70    4.30
  -2  -3  16    9.00    8.70
   1   3 -16   86.29   13.80
   1   3 -16   94.89    9.80
   1   3 -16   90.89   11.70
  -1  -3  16   87.09   13.10
   0   3 -16  109.29   12.80
   0   3 -16  104.49   11.00
   0   3 -16  107.59   15.80
   0  -3  16   80.39   13.70
  -1   3 -16    7.90    5.70
  -1   3 -16    0.50    6.30
  -1   3 -16   17.30    8.80
   1  -3  16    6.90    7.10
  -2   3 -16   61.99   10.90
  -2   3 -16   65.99   12.40
  -2   3 -16   69.09    9.90
   2  -3  16   52.19   11.70
   2   4  16   56.79   11.80
  -2  -4 -16   77.79   13.80
  -2  -4 -16   58.09    9.50
  -2  -4 -16   57.29    9.60
  -2  -4 -16   48.40    9.20
   1   4  16    2.30    8.00
  -1  -4 -16   19.40    9.40
  -1  -4 -16   15.20    6.40
  -1  -4 -16   11.20    5.80
  -1  -4 -16   28.40    7.30
   0   4  16  128.69   16.20
   0  -4 -16   86.29   10.40
   0  -4 -16  115.19   16.00
  -1   4  16   18.50    9.00
   1  -4 -16   24.90    6.00
   1  -4 -16   36.50   10.50
  -2   4  16  215.68   18.60
   2  -4 -16  204.98   11.30
   2  -4 -16  222.28   18.40
  -3   4  16    7.80    7.90
   3  -4 -16    9.20    7.80
   3  -4 -16    5.30    2.80
   3  -4 -16    8.40    2.90
   4  -4 -16   78.39   13.40
   4   4  15   -4.40    6.20
  -4  -4 -15    8.30    6.80
  -4  -4 -15    5.00    7.70
  -4  -4 -15    4.00    6.00
   3   4  15  164.18   16.10
  -3  -4 -15  143.69   13.40
  -3  -4 -15  159.28   14.20
  -3  -4 -15  144.99   13.20
  -3  -4 -15  155.68   16.80
   2   4  15   28.80    9.80
  -2  -4 -15   30.70    7.30
  -2  -4 -15   31.20    7.50
  -2  -4 -15   29.40    9.40
  -2  -4 -15    4.40    6.20
   1   4  15  324.07   20.90
  -1  -4 -15  266.37   19.50
  -1  -4 -15  274.87   16.30
  -1  -4 -15  262.37   15.70
  -1  -4 -15  297.27   16.40
   0   4  15   56.29   10.90
   0  -4 -15   70.59    9.00
   0  -4 -15   47.00    7.70
   0  -4 -15   41.80    7.50
   0  -4 -15   49.60   10.60
  -1   4  15   25.50    8.50
   1  -4 -15    9.60    8.00
   1  -4 -15   13.50    5.10
  -2   4  15   -3.20    6.50
   2  -4 -15   -3.30    3.50
   2  -4 -15    0.60    6.70
  -3   4  15   87.59   12.90
   3  -4 -15   67.69   12.00
   3  -4 -15   89.29    6.20
  -4   4  15   -2.70    5.30
   4  -4 -15   -0.80    6.60
   5  -4 -15   60.59   11.50
   6  -4 -15   80.89   12.30
   6   4  14  186.38   17.40
  -6  -4 -14  189.88   17.50
  -6  -4 -14  186.68   17.10
  -6  -4 -14  166.08   15.90
   5   4  14   24.40    8.40
  -5  -4 -14    4.20    7.30
  -5  -4 -14   -0.80    6.30
  -5  -4 -14   20.20    8.00
   4   4  14    1.10    6.50
  -4  -4 -14   -8.90    6.00
  -4  -4 -14    2.20    6.30
  -4  -4 -14    0.40    5.70
   3   4  14    8.50    7.40
  -3  -4 -14   -0.60    5.70
  -3  -4 -14    6.50    5.70
  -3  -4 -14   -4.60    5.70
  -3  -4 -14    9.50    5.70
   2   4  14   12.30    7.50
  -2  -4 -14    4.80    5.40
  -2  -4 -14   13.00    6.00
  -2  -4 -14    7.00    5.50
  -2  -4 -14   12.60    7.90
   1   4  14   -2.40    6.20
  -1  -4 -14    0.60    4.60
  -1  -4 -14    1.10    4.70
  -1  -4 -14   -0.90    6.50
  -1  -4 -14    2.60    4.80
   0   4  14  145.69   14.50
   0  -4 -14  162.18   11.70
   0  -4 -14  152.68   15.50
   0  -4 -14  157.38   11.30
   0  -4 -14  156.98   11.40
  -1   4  14    8.40    6.80
   1  -4 -14    2.90    3.80
   1  -4 -14    4.30    4.20
   1  -4 -14   -3.60    3.70
   1  -4 -14    7.20    6.80
  -2   4  14   13.20    7.80
   2  -4 -14   28.40    5.10
   2  -4 -14   36.00    5.80
   2  -4 -14   36.60    9.20
  -3   4  14    3.60    5.60
   3  -4 -14   12.60    3.30
   3  -4 -14    2.50    5.90
  -4   4  14   45.90   10.00
   4  -4 -14   52.29    9.90
  -5   4  14    8.50    6.40
   5  -4 -14    3.10    6.00
   6  -4 -14   67.19   10.70
   7  -4 -14   15.10    7.10
   7   4  13    5.10    6.50
   7   4  13    8.70    6.60
  -7  -4 -13    1.40    6.80
  -7  -4 -13  -11.70    5.50
   6   4  13   35.00    8.90
   6   4  13   18.60    7.10
  -6  -4 -13   27.60    8.30
  -6  -4 -13   14.10    7.90
  -6  -4 -13   25.30    8.70
   5   4  13  227.48   15.40
   5   4  13  241.38   17.60
  -5  -4 -13  210.58   16.60
  -5  -4 -13  194.58   15.80
  -5  -4 -13  246.38   17.40
   4   4  13   21.20    7.30
   4   4  13   12.80    5.70
  -4  -4 -13    7.00    6.70
  -4  -4 -13   22.40    7.50
  -4  -4 -13   16.00    6.10
  -4  -4 -13   35.10    8.10
   3   4  13  283.07   18.80
   3   4  13  323.67   16.00
  -3  -4 -13  334.97   18.40
  -3  -4 -13  364.16   17.50
  -3  -4 -13  392.16   21.80
  -3  -4 -13  291.67   17.30
   2   4  13   13.00    7.20
   2   4  13   13.00    4.50
  -2  -4 -13   17.20    5.90
  -2  -4 -13   18.90    6.00
  -2  -4 -13    7.10    5.20
  -2  -4 -13    0.90    5.80
   1   4  13   72.69   10.70
   1   4  13   60.69    6.80
  -1  -4 -13   57.39    7.90
  -1  -4 -13   74.59    9.10
  -1  -4 -13   70.09    9.00
  -1  -4 -13   77.39   11.50
   0   4  13   34.60    8.70
   0  -4 -13   34.80    8.50
   0  -4 -13   21.90    5.70
   0  -4 -13   44.20    6.80
   0  -4 -13   18.10    5.60
  -1   4  13  284.77   18.20
   1  -4 -13  271.27   13.20
   1  -4 -13  266.37   13.20
   1  -4 -13  258.57   17.30
   1  -4 -13  239.18   12.40
  -2   4  13   28.50    7.90
   2  -4 -13   28.10    4.90
   2  -4 -13   33.90    5.50
   2  -4 -13   30.00    8.70
   2  -4 -13   39.60    5.10
  -3   4  13  358.86   19.90
   3  -4 -13  353.56   12.30
   3  -4 -13  360.56   19.90
   3  -4 -13  368.66   13.80
  -4   4  13   55.39    9.70
   4  -4 -13   48.30    9.70
  -5   4  13   30.10    8.10
   5  -4 -13   13.90    7.00
   6  -4 -13   11.20    6.70
   7  -4 -13  124.29   13.10
   8  -4 -13    6.20    5.70
   8   4  12  199.68   16.20
   8   4  12  170.28   15.90
  -8  -4 -12  196.18   17.80
  -8  -4 -12  159.88   16.80
   7   4  12   25.90    7.80
   7   4  12   33.40    8.70
  -7  -4 -12   35.60    9.10
  -7  -4 -12   26.20    8.70
   6   4  12    6.30    5.70
   6   4  12   -6.30    4.50
  -6  -4 -12    3.70    5.90
  -6  -4 -12   -3.20    5.80
  -6  -4 -12    3.70    6.10
   5   4  12   17.40    6.30
   5   4  12   17.80    7.20
  -5  -4 -12   14.10    6.90
  -5  -4 -12   15.20    6.90
  -5  -4 -12    6.70    6.50
   4   4  12  226.58   14.10
   4   4  12  256.07   17.60
  -4  -4 -12  256.07   16.20
  -4  -4 -12  221.58   14.00
  -4  -4 -12  243.68   15.80
  -4  -4 -12  285.47   17.90
   3   4  12   -3.10    5.50
   3   4  12   -4.60    3.40
  -3  -4 -12    3.80    4.90
  -3  -4 -12   -3.00    4.60
  -3  -4 -12   -1.10    5.20
  -3  -4 -12    0.20    4.20
   2   4  12  222.98   12.10
   2   4  12  214.68   15.50
  -2  -4 -12  262.57   17.20
  -2  -4 -12  221.38   13.90
  -2  -4 -12  213.98   13.20
  -2  -4 -12  241.98   14.20
   1   4  12   94.59    7.70
   1   4  12  116.69   12.60
  -1  -4 -12  112.89    9.90
  -1  -4 -12  111.79    9.80
  -1  -4 -12  100.49   12.40
  -1  -4 -12  101.59    9.70
   0   4  12    4.70    5.80
   0   4  12    2.50    2.50
   0  -4 -12    0.80    3.70
   0  -4 -12   -6.40    3.10
   0  -4 -12   -3.90    5.40
   0  -4 -12    0.00    3.70
  -1   4  12   26.50    3.60
  -1   4  12   28.50    7.20
   1  -4 -12   25.60    7.80
   1  -4 -12   23.50    4.80
   1  -4 -12   21.80    4.70
   1  -4 -12   30.10    5.40
  -2   4  12   11.10    5.60
   2  -4 -12   11.10    3.80
   2  -4 -12   15.30    3.70
   2  -4 -12   11.40    3.80
   2  -4 -12   11.90    6.00
  -3   4  12    8.10    5.50
   3  -4 -12    1.20    5.50
   3  -4 -12    2.90    2.50
   3  -4 -12    2.70    2.10
   3  -4 -12    3.60    2.80
  -4   4  12   87.29   10.90
   4  -4 -12  113.59   12.10
  -5   4  12  254.87   15.70
   5  -4 -12  245.98   16.10
  -6   4  12   17.50    6.40
   6  -4 -12   29.40    7.50
   7  -4 -12   19.60    6.50
   8  -4 -12    2.90    5.20
   9  -4 -12    1.80    4.70
   9   4  11    2.40    5.80
  -9  -4 -11   -1.70    6.60
  -9  -4 -11   -6.30    6.10
   8   4  11   -1.10    5.90
   8   4  11   -1.90    5.20
  -8  -4 -11    5.20    6.30
  -8  -4 -11    3.20    7.50
   7   4  11   61.49    9.90
   7   4  11   70.39   10.80
  -7  -4 -11   65.59   10.80
  -7  -4 -11   76.29   11.20
  -7  -4 -11   69.19   12.10
   6   4  11    0.20    5.30
   6   4  11   -2.40    4.80
  -6  -4 -11   -2.20    5.70
  -6  -4 -11   -1.80    5.60
  -6  -4 -11   11.40    6.60
   5   4  11   24.30    6.40
   5   4  11   21.20    7.00
  -5  -4 -11   22.40    6.80
  -5  -4 -11   29.90    7.60
  -5  -4 -11   31.50    7.70
   4   4  11   27.20    7.30
   4   4  11   15.70    5.50
  -4  -4 -11   21.20    6.70
  -4  -4 -11   23.20    7.30
  -4  -4 -11   31.20    6.60
  -4  -4 -11    3.50    5.40
   3   4  11   15.10    5.00
   3   4  11    8.30    5.80
  -3  -4 -11   13.60    6.50
  -3  -4 -11   16.10    5.10
  -3  -4 -11   22.40    6.20
  -3  -4 -11   24.10    6.50
   2   4  11    7.00    5.50
   2   4  11   17.40    4.30
  -2  -4 -11   22.90    7.70
  -2  -4 -11    7.50    5.00
  -2  -4 -11   21.70    5.90
  -2  -4 -11   20.10    6.10
   1   4  11  214.68   10.60
   1   4  11  231.58   15.60
  -1  -4 -11  220.58   12.40
  -1  -4 -11  213.88   15.30
  -1  -4 -11  228.38   12.50
  -1  -4 -11  196.78   11.80
   0   4  11    6.00    2.90
   0   4  11    0.80    5.00
   0  -4 -11    4.50    4.10
   0  -4 -11   -3.40    5.60
   0  -4 -11    1.70    3.80
   0  -4 -11    3.20    4.00
  -1   4  11   10.20    2.60
  -1   4  11   12.20    5.70
  -1   4  11   13.90    4.80
   1  -4 -11    8.30    3.60
   1  -4 -11    4.40    6.10
   1  -4 -11   15.10    4.40
   1  -4 -11   13.00    4.20
  -2   4  11   57.29    9.00
   2  -4 -11   46.40    5.90
   2  -4 -11   47.80    5.20
   2  -4 -11   39.70    5.20
   2  -4 -11   31.00    7.80
  -3   4  11  216.58   13.80
   3  -4 -11  221.58    8.70
   3  -4 -11  212.98    7.80
   3  -4 -11  214.68    7.90
   3  -4 -11  219.18    9.30
   3  -4 -11  202.18   14.30
  -4   4  11   13.00    5.80
   4  -4 -11   18.90    6.20
  -5   4  11  329.87   17.20
   5  -4 -11  364.26   18.30
  -6   4  11    7.00    4.90
   6  -4 -11   14.10    5.80
   7  -4 -11  154.28   12.30
   8  -4 -11    3.30    4.80
   9  -4 -11   83.39    9.60
  10  -4 -11   -0.90    4.30
  10   4  10    0.10    5.60
 -10  -4 -10   12.40    8.60
 -10  -4 -10   -4.10    6.60
   9   4  10    0.00    6.20
   9   4  10   -1.10    5.00
  -9  -4 -10   16.70    7.50
  -9  -4 -10   -6.70    6.30
   8   4  10    6.00    5.40
   8   4  10   -6.50    5.20
  -8  -4 -10   10.00    7.40
  -8  -4 -10   -1.90    5.80
   7   4  10    4.10    5.20
   7   4  10   10.00    6.10
  -7  -4 -10    7.90    6.70
  -7  -4 -10    9.00    6.70
  -7  -4 -10    1.20    5.30
   6   4  10  296.47   17.30
   6   4  10  347.17   18.10
  -6  -4 -10  292.67   16.80
  -6  -4 -10  335.77   19.10
  -6  -4 -10  343.77   19.10
   5   4  10   18.70    5.80
   5   4  10   22.50    6.30
  -5  -4 -10   20.90    6.90
  -5  -4 -10   25.50    7.30
  -5  -4 -10   20.50    5.70
  -5  -4 -10   30.00    7.50
   4   4  10  230.08   15.30
   4   4  10  237.18   13.70
  -4  -4 -10  233.28   14.80
  -4  -4 -10  245.88   14.80
  -4  -4 -10  229.68   13.00
  -4  -4 -10  228.48   14.50
   3   4  10    1.10    5.40
   3   4  10    5.90    4.20
  -3  -4 -10   -3.00    5.30
  -3  -4 -10   11.30    5.00
  -3  -4 -10   10.50    5.40
   2   4  10   33.70    7.30
   2   4  10   30.40    5.30
  -2  -4 -10   25.60    7.40
  -2  -4 -10   21.60    5.50
  -2  -4 -10   16.00    5.60
   1   4  10   29.80    4.70
   1   4  10   22.60    6.90
  -1  -4 -10   33.20    6.10
  -1  -4 -10   24.60    5.70
  -1  -4 -10   46.30    8.30
   0   4  10  321.47   17.20
   0   4  10  345.27   12.40
   0  -4 -10  335.77   14.40
   0  -4 -10  317.17   13.80
   0  -4 -10  337.97   17.90
   0  -4 -10  367.66   14.50
  -1   4  10   34.60    6.10
  -1   4  10   34.80    7.50
  -1   4  10   29.90    4.10
   1  -4 -10   37.70    5.60
   1  -4 -10   24.30    5.00
   1  -4 -10   25.90    6.50
   1  -4 -10   33.10    5.10
  -2   4  10  190.78   12.80
  -2   4  10  188.38    6.70
   2  -4 -10  202.98    9.40
   2  -4 -10  210.68    8.70
   2  -4 -10  190.38    9.40
   2  -4 -10  189.68   13.00
  -3   4  10   -1.10    4.40
  -3   4  10    3.20    2.50
   3  -4 -10    5.30    2.00
   3  -4 -10    5.10    5.30
   3  -4 -10    6.00    1.80
   3  -4 -10    6.70    2.50
   3  -4 -10    1.20    2.40
  -4   4  10   19.30    2.90
  -4   4  10    5.80    4.90
   4  -4 -10    5.50    4.80
  -5   4  10   80.19    9.10
  -5   4  10   79.19    4.30
   5  -4 -10   92.59    9.10
   5  -4 -10   78.49    9.70
  -6   4  10  138.49   10.60
  -6   4  10  149.49    6.10
   6  -4 -10  172.48   11.80
   7  -4 -10   13.70    5.20
   8  -4 -10  332.37   16.00
   9  -4 -10    6.70    4.40
  10  -4 -10   16.60    4.80
  11  -4 -10   13.70    4.20
  10   4   9   -1.60    5.00
 -10  -4  -9    2.30    7.50
 -10  -4  -9   -9.20    6.50
   9   4   9  286.57   19.30
   9   4   9  227.48   15.40
  -9  -4  -9  267.67   19.20
  -9  -4  -9  250.47   19.10
   8   4   9  154.28   12.60
   8   4   9  166.58   14.70
  -8  -4  -9  152.68   15.20
  -8  -4  -9  170.98   14.80
   7   4   9   23.20    6.80
   7   4   9   14.50    6.10
  -7  -4  -9   27.20    8.20
  -7  -4  -9   22.70    7.60
  -7  -4  -9    9.70    5.40
   6   4   9   50.29    8.10
   6   4   9   52.69    8.40
  -6  -4  -9   58.39   10.00
  -6  -4  -9   54.99    9.20
  -6  -4  -9   66.29    9.20
   5   4   9   11.60    5.50
   5   4   9    8.50    4.70
  -5  -4  -9    3.40    4.30
  -5  -4  -9    5.80    5.40
  -5  -4  -9    6.40    4.90
  -5  -4  -9    6.20    5.80
  -5  -4  -9    7.30    5.30
   4   4   9   -2.40    3.90
   4   4   9   -0.50    4.80
  -4  -4  -9    0.50    5.10
  -4  -4  -9    7.80    5.60
  -4  -4  -9   -7.30    3.80
  -4  -4  -9   -4.90    4.50
   3   4   9  319.77   14.50
   3   4   9  285.37   15.60
  -3  -4  -9  281.77   15.60
  -3  -4  -9  302.17   15.10
  -3  -4  -9  297.47   13.90
   2   4   9    1.20    3.40
   2   4   9    4.90    5.00
  -2  -4  -9   -1.00    4.70
  -2  -4  -9   12.10    4.30
  -2  -4  -9    7.40    4.70
   1   4   9   54.19    6.20
   1   4   9   84.29    9.10
  -1  -4  -9   48.50    6.20
  -1  -4  -9   55.09    8.40
  -1  -4  -9   70.19    7.50
   0   4   9   17.50    3.40
   0   4   9   17.20    6.00
   0  -4  -9   12.80    5.30
   0  -4  -9   19.50    4.40
   0  -4  -9   14.60    4.20
  -1   4   9   95.09    8.00
  -1   4   9   75.29    5.10
  -1   4   9   86.79    9.00
   1  -4  -9   67.69    6.90
   1  -4  -9   65.49    6.00
   1  -4  -9   93.69   10.00
   1  -4  -9   71.89    6.40
  -2   4   9   22.50    5.70
  -2   4   9   31.00    3.40
   2  -4  -9   31.80    4.50
   2  -4  -9   26.30    6.20
   2  -4  -9   28.30    3.60
   2  -4  -9   34.00    4.30
  -3   4   9  117.29    5.90
  -3   4   9  104.79    4.50
  -3   4   9  117.79   10.20
   3  -4  -9   94.19    5.60
   3  -4  -9  121.29   10.10
   3  -4  -9  110.89    4.50
   3  -4  -9  143.29   10.90
   3  -4  -9  103.59    5.30
   3  -4  -9  109.69    4.50
  -4   4   9   46.50    3.40
  -4   4   9   49.40    3.90
  -4   4   9   50.89    7.30
   4  -4  -9   50.69    7.70
   4  -4  -9   58.09    8.20
  -5   4   9  153.78   10.70
  -5   4   9  146.49    5.60
  -5   4   9  140.19    6.30
   5  -4  -9  136.79   10.10
   5  -4  -9  156.18   11.30
  -6   4   9   33.60    4.40
  -6   4   9   31.90    6.00
  -6   4   9   33.70    3.20
   6  -4  -9   24.70    5.80
   6  -4  -9   32.50    5.80
  -7   4   9   11.70    4.30
  -7   4   9   19.50    3.70
[truncated: 7,012,736 more chars]
